# Supplementary material for: Genome-wide identification of SMALL AUXIN UP RNA (SAUR) gene family and its expression profiles in response to abiotic stress and auxin in tea plants ( Camellia sinensis )
Source: PeerJ journal article supplement (doi:10.7717/peerj.20681), 2026-01-30
Supplement: IAA_SAUR10_12_16_71.xlsx [file IAA_SAUR10_12_16_71.xlsx]

## Sheet: Quantification Amplification
	Cycle	A1	A2	A3	A4	A5	A6	A7	A8	A9	A10	A11	A12	B1	B2	B3	B4	B5	B6	B7	B8	B9	B10	B11	B12	C1	C2	C3	C4	C5	C6	C7	C8	C9	C10	C11	C12	D1	D2	D3	D4	D5	D6	D7	D8	D9	D10	D11	D12
	1	14.8202	4.17425	44.0622	54.1771	26.9416	51.0129	23.685	58.0815	33.7605	54.0418	25.1485	36.1368	-3.95915	-23.7328	-36.1374	-23.3165	-6.17319	-4.81095	19.2928	8.82332	10.9067	35.3766	-3.81522	3.57815	-28.2824	-8.79259	-12.0654	-2.0783	-4.9895	-15.0487	-0.16664	-6.02984	21.8191	18.356	27.4605	28.3116	-26.0738	-33.5704	-14.3344	5.58147	-0.113174	-18.7877	-18.8448	-15.436	-31.8899	-0.0749123	13.5329	22.669
	2	-1.12945	0.656848	-9.33024	-3.02605	-1.11186	-6.16667	-1.24819	-0.373933	-1.59442	5.36866	5.17314	-9.01912	-0.591637	-1.79051	-3.10281	-2.85127	-2.08237	-5.89019	5.52528	-4.96976	-6.65266	4.43973	-1.40446	0.73595	-0.952285	-3.0919	-4.76855	4.93708	2.00089	-6.89355	-5.9176	1.50874	-8.97475	3.95701	-3.00111	-2.58062	-0.102397	-7.67925	-9.17886	-2.00289	-8.582	-4.4361	-0.106526	0.744219	-5.38851	2.86513	-1.4116	-0.0781807
	3	1.99047	2.06881	-1.71585	0.515841	-0.641114	0.763955	-1.85315	0.690218	-4.92798	2.70943	3.39858	-4.13739	-2.57711	0.713505	-2.74839	1.55725	-2.75282	-2.49832	0.594468	0.318155	-2.9349	1.30336	2.16326	2.08791	2.04816	-1.38969	-0.562662	2.32612	2.00732	1.15483	1.08696	-0.0663708	-2.67015	1.40577	-0.730119	2.95433	1.27651	-0.174155	-3.38003	-1.44622	-3.53252	1.9841	-2.58049	0.0898043	-1.23197	-1.20465	2.68537	-5.20329
	4	-1.97941	2.73111	-2.72924	1.07098	-1.4327	2.92093	0.199333	-0.823427	1.12817	5.99472	3.58238	4.34807	1.3163	1.73094	-0.959978	-0.137736	0.363704	-2.15713	0.858817	5.88271	0.125915	5.05828	3.03508	0.44115	-5.15622	2.34994	-1.1963	5.11992	0.146511	-1.65923	0.017631	-2.40457	-0.1656	2.37968	2.76305	1.21672	0.564186	4.58234	-0.710933	1.85769	4.33106	-2.90492	1.86146	0.237874	2.34667	-0.67319	-1.48967	2.7422
	5	3.48038	2.88233	0.150931	1.60062	3.61502	1.06652	6.35402	1.63531	1.00317	-2.85767	-5.04416	-4.39373	3.81605	2.63211	1.55181	1.53549	4.59916	0.524249	0.386874	-0.967607	2.85745	-3.28593	4.60296	-0.876053	5.95813	-0.538115	0.970945	-4.11806	0.627122	-0.868398	4.27396	3.2148	3.61379	-0.27617	1.04967	-5.75428	0.878053	1.71144	1.23504	4.18985	-0.325165	1.74041	3.67556	-0.113413	1.87391	5.09414	0.503516	2.53567
	6	4.28537	-2.07023	2.54399	1.63047	2.04779	1.48767	-1.35214	0.502395	2.4039	0.0850956	1.75557	-0.19572	1.29204	2.74238	-2.63138	3.15521	2.10082	1.76029	2.45355	-2.04422	-0.000390449	3.92839	-0.153739	0.0291209	4.84286	2.71624	0.666298	3.88323	2.69959	2.72239	1.166	4.97995	-2.08815	0.630952	6.0814	-0.942092	0.691635	-1.21175	2.64218	4.37782	4.58059	-4.02991	1.7921	5.19018	-1.10955	2.03676	3.35214	-0.104923
	7	-0.724	-3.70871	-1.11301	-2.60091	4.00474	1.55274	-3.83825	0.843717	-1.67956	0.0430606	1.53163	0.516783	4.38265	2.09078	1.93143	-1.52402	0.258813	0.929982	1.37535	-1.76688	2.42868	-3.33792	-1.96457	-0.948071	-2.92836	3.52359	2.55719	-0.844832	4.33691	3.72246	-1.91642	2.78572	-3.12175	-2.06432	-0.14315	0.83137	1.86038	0.256216	1.57523	-4.66666	-1.08866	1.04865	0.540068	2.1156	-1.33185	-1.74565	-2.58613	4.08061
	8	3.13265	1.87248	1.93699	2.17647	0.0301743	0.698773	3.43498	4.74871	3.53561	-0.497846	-0.795293	-0.268077	-0.653617	-1.42781	1.09002	-0.100659	4.02162	1.53483	0.219938	1.68053	-0.100164	0.140667	-0.146823	3.2457	-0.0583893	0.531594	-0.166996	-0.48417	0.595655	-2.1682	-2.57836	2.93389	3.07725	3.39367	1.03694	-1.33922	1.33266	-0.562797	0.272935	-1.88894	-0.260743	2.76171	1.22269	2.02736	0.0244893	-1.1206	-1.57923	-1.83381
	9	1.06905	6.521	2.66004	3.73138	-1.47093	3.5127	4.96096	-0.97356	1.03047	5.29838	4.88589	7.24409	-0.36418	-1.98808	4.11392	2.5444	0.0631266	-0.162621	1.30008	1.90621	-1.61668	2.58043	-0.444962	-1.28129	0.798183	1.32511	1.85622	2.42902	0.471294	-0.694199	-1.53058	-2.19133	0.79463	1.25139	-4.88569	3.06426	-3.03537	-0.210627	2.11392	3.46717	3.23755	2.6722	-0.225949	-1.34851	2.8397	-0.167178	1.26939	-3.04109
	10	0.677646	-0.996112	1.83192	-5.41796	0.642988	-4.08775	-2.29841	2.56339	2.94411	-3.21271	0.678553	0.632923	0.0972846	-3.50804	-2.67164	-2.47614	-2.02746	2.46648	2.78699	1.49916	-0.186762	-1.30528	-4.7151	-0.153086	1.4837	2.5676	-1.36899	-2.05009	-4.86147	1.26538	2.39651	1.11304	0.615865	1.90864	-3.11516	3.66775	0.894185	3.42763	0.351605	1.30142	-1.14203	-0.112657	0.140609	-2.50143	-0.735484	0.694494	2.88039	5.55036
	11	-2.59559	-1.30644	-3.03562	1.03003	1.50823	0.0278984	-0.969661	-1.60704	1.41226	-3.7413	-1.93791	2.8966	-2.28306	2.37593	0.0103329	-0.317955	3.06189	-1.99276	-0.74986	1.23772	1.5847	2.46232	-2.30626	-4.60035	-0.105509	-1.93838	-0.135705	-0.268689	-0.896288	1.05613	3.14116	0.510004	3.1863	0.304588	-0.0946415	-0.608536	2.82547	1.49067	0.744812	-0.575744	0.00126069	3.30883	1.17618	2.78867	-0.984871	0.055431	0.257734	-1.24629
	12	3.3249	3.87994	2.86906	3.21577	6.01742	-1.53639	0.950466	-1.01644	2.52367	1.64847	4.13742	0.79628	0.532436	5.59081	1.79839	3.97155	5.10051	-0.876459	0.909142	0.318324	7.63038	2.2849	1.06486	-4.02477	3.94767	3.93281	2.84824	5.81304	-2.33579	-0.179049	3.61045	3.4599	0.706094	1.2779	7.3309	5.03263	-0.424926	1.73603	-0.701202	5.04348	2.81518	-1.18476	5.02825	1.6219	1.72597	1.33809	6.26172	-1.21588
	13	7.89075	5.56879	5.56462	8.34854	12.2219	0.711359	11.2073	6.30822	0.124363	6.98467	5.01909	-0.331056	6.06876	9.23892	0.456385	8.23482	12.4645	1.04299	8.39254	7.9738	-0.355887	6.13156	9.40559	2.21929	9.76124	11.1708	-2.58606	8.26523	8.27087	2.89877	14.6655	10.3138	-1.80084	7.40703	10.5754	1.82193	7.2794	9.42479	2.24265	16.0142	16.6626	-1.27458	14.1786	7.76652	-1.54793	13.4434	10.3723	2.02216
	14	17.9396	15.7932	-3.22019	24.8564	29.2629	1.67227	22.1233	23.7845	1.70908	12.2433	20.9189	1.05254	17.9321	20.4102	1.09972	26.9243	28.7723	3.40928	22.1498	18.9037	-0.307316	16.896	15.4849	3.45339	24.8341	21.4744	1.56688	24.67	21.6781	-1.12528	34.9662	22.6651	3.08361	14.5747	26.6801	-3.24269	21.0726	25.0967	0.704332	28.3407	27.1831	0.359347	23.5004	19.4346	-2.49243	22.9182	30.8285	1.32755
	15	47.4266	40.6541	2.15743	58.4995	61.9267	1.51397	55.2377	47.5339	1.92692	41.6852	52.337	-1.10073	42.2881	44.4692	2.78383	48.8767	57.6785	2.34266	51.675	36.0548	-5.91338	34.0394	50.8121	0.754842	59.1873	50.9109	-4.22159	59.1975	61.6777	-2.92632	63.6704	45.4065	0.261545	41.9419	64.8663	-2.16501	47.1627	52.7495	0.243633	52.1614	49.4478	1.25668	52.234	46.7527	2.07215	47.8853	56.612	-4.67886
	16	83.9755	90.3436	-2.58951	99.9411	116.132	-1.89194	103.12	84.6318	-1.51278	83.5033	98.3916	-1.16363	82.8591	89.0425	2.53262	100.865	115.266	-1.23465	96.4547	76.1261	-3.55012	76.7997	102.275	2.33056	106.295	101.377	1.33855	112.11	113.88	-0.505804	123.094	95.3439	4.52841	84.183	125.277	1.42396	96.1083	99.2739	-0.782992	103.69	111.98	-2.92245	104.913	86.2619	1.3375	89.5411	107.75	3.47898
	17	156.781	164.571	3.35335	184.781	202.294	-6.12657	180.394	164.167	-2.09811	149.741	191.066	0.812359	153.454	165.916	2.46703	179.482	196.763	1.48516	180.49	142.001	2.56107	146.545	182.052	0.841918	190.713	180.472	-0.491469	201.16	218.384	-4.0824	216.723	181.433	-1.93638	157.552	220.735	-1.95779	170.317	177.728	-0.783374	188.503	192.435	0.722793	183.027	164.486	1.60078	158.681	187.754	-1.71354
	18	253.832	269.819	0.288695	295.879	313.75	-2.99658	293.813	279.232	-2.89267	254.994	308.579	-2.05147	257.618	275.687	-2.07064	292.933	311.724	2.47164	296.5	237.381	2.30811	249.011	292.826	5.54738	309.288	295.679	3.62176	332.144	347.612	0.364448	354.79	312.822	-0.0380608	267.884	358.907	-0.236657	278.731	291.545	-0.507406	307.899	302.28	0.27904	300.213	271.153	0.274708	265.596	304.414	3.0902
	19	349.292	374.392	-3.85382	403.224	421.239	-1.0633	404.596	393.424	-0.637415	364.995	424.237	-2.23223	358.07	385.753	-3.13635	402.649	418.61	1.54965	410.681	335.949	-2.44374	356.701	403.731	1.17827	425.837	412.42	1.09418	458.794	470.185	5.33561	489.012	442.878	0.0469492	383.099	495.102	3.41819	385.961	407.987	1.0964	424.148	407.023	2.03059	415.299	383.036	-2.1302	377.28	418.036	2.50174
	20	436.234	469.255	-2.68399	494.96	512.38	-3.48267	502.404	499.047	-1.13045	469.993	531.338	-2.55768	447.404	483.439	-2.96567	498.775	510.092	-2.46249	511.616	428.37	-0.73785	460.516	503.006	-2.71698	529.999	516.827	-3.02435	568.728	573.737	0.759855	607.318	560.358	-1.22328	490.823	617.681	-7.67007	481.816	511.687	-5.12447	525.607	498.237	-2.41134	518.26	488.93	1.89433	483.387	516.728	0.0980734
	21	502.337	542.494	0.0638626	564.045	579.89	0.488599	576.347	580.235	-5.25264	552.986	609.236	-0.516474	514.492	558.79	3.71424	567.561	574.207	-3.13339	586.489	501.346	-0.281537	539.599	576.26	-0.694477	609.783	596.027	0.0512787	646.71	646.859	0.418905	693.355	653.224	-3.84873	576.742	706.279	-3.63334	552.64	590.211	-3.98136	600.982	562.067	-1.81616	593.717	569.018	0.619918	568.629	591.024	-2.21262
	22	547.377	590.837	2.65384	607.556	621.909	-1.43104	625.637	636.191	-2.89124	610.711	660.038	3.28771	561.753	606.985	-2.05893	614.372	616.943	-0.518201	633.873	551.215	2.4897	594.095	621.003	-5.95691	664.102	646.869	1.67846	697.777	694.546	2.08982	751.074	715.961	-0.226548	632.095	762.858	-0.466271	601.275	639.444	-0.00942729	652.397	603.452	3.72364	642.816	622.441	-0.456597	627.849	642.136	-3.93256
	23	574.395	620.572	1.85151	632.704	646.086	5.53831	656.107	668.453	1.04689	644.59	687.997	-0.260458	590.036	637.159	-0.0216274	641.855	642.881	5.08312	662.872	578.255	1.31572	627.351	652.104	-1.6198	697.871	680.501	1.01872	727.5	722.977	4.20819	785.845	753.896	2.67159	668.194	800.79	4.1748	632.532	673.295	7.73484	684.918	628.131	0.240612	669.286	654.252	3.79259	662.276	674.652	-0.510788
	24	592.818	635.732	10.1887	649.584	660.923	8.61633	673.34	688.099	9.68139	665.497	706.588	2.07094	608.295	656.444	4.01523	660.615	657.567	11.1189	680.351	595.19	4.23099	651.314	668.515	5.11046	720.313	701.688	6.44838	748.977	740.663	12.9806	808.262	775.339	7.21474	690.082	823.541	4.76568	652.226	694.687	6.76147	703.482	644.635	8.62126	686.139	674.964	8.5153	683.451	694.521	3.87228
	25	604.16	643.882	16.4086	659.946	667.206	14.1659	681.892	697.725	12.5555	675.512	719.345	8.80764	619.995	666.887	16.4433	669.723	665.151	24.3864	691.434	602.925	15.0641	665.936	682.555	-0.427704	733.668	715.055	16.1513	759.412	750.393	27.0658	820.23	786.029	16.5709	705.469	837.201	9.58983	662.183	707.917	19.7674	713.998	654.388	22.7741	696.965	683.884	16.0121	695.653	705.313	4.20422
	26	613.798	649.275	32.7554	667.726	672.977	32.6823	686.872	706.307	30.5526	683.658	726.675	26.9982	627.4	673.315	34.7752	675.963	669.368	49.6355	698.598	611.615	39.6526	677.635	686.504	17.8752	744.222	723.828	31.1535	766.436	755.024	49.7255	831.246	793.169	34.8032	714.351	841.251	28.5395	670.454	714.094	31.9705	720.695	658.109	44.0944	704.376	690.323	37.9621	704.926	714.85	16.4119
	27	617.11	651.801	71.6019	670.333	673.667	66.9534	689.363	709.059	62.858	689.21	728.016	44.1493	631.539	674.78	62.9168	676.61	672.634	91.349	699.515	614.172	74.3147	680.947	691.702	38.1909	748.664	726.004	66.7896	766.586	756.258	95.1622	835.177	793.904	78.6398	719.901	844.201	52.3806	674.993	716.813	63.6774	725.118	657.96	84.7073	708.648	690.067	77.9816	711.56	719.951	38.3512
	28	620.391	651.627	131.977	672.345	675.181	130.091	690.822	708.93	127.659	694.713	727.49	88.8008	633.898	676.434	123.147	678.392	675.8	167.979	700.915	615.716	133.147	683.707	690.285	71.5258	752.914	728.188	118.22	766.763	753.455	170.794	838.259	794.017	131.67	723.005	845.963	87.5577	679.866	719.268	118.792	726.931	659.121	148.308	708.571	689.479	143.515	715.07	721.374	78.7267
	29	621.708	649.857	222.297	671.055	672.57	222.515	692.94	704.313	209.161	695.609	723.839	155.53	636.699	675.659	198.265	678.705	674.945	274.18	699.286	613.776	232.656	680.149	689.667	141.025	755.813	727.444	211.734	765.266	749.561	292.914	837.881	790.079	242.283	723.685	845.621	167.566	680.644	719.26	207.389	725.019	658.937	252.584	709.498	686.287	241.901	720.117	717.431	139.79
	30	623.091	649.052	317.995	670.19	670.2	320.06	691.831	700.332	326.737	695.44	722.121	259.14	637.703	674.301	314.461	679.645	671.596	383.949	699.379	609.99	340.827	677.977	686.431	241.872	757.459	726.918	313.878	763.316	745.434	418.22	838.026	788.109	365.354	721.906	842.075	278.895	681.129	718.51	314.485	724.282	659.199	360.639	707.615	685.142	347.706	719.716	716.526	244.154
	31	621.445	647.115	412.497	666.84	666.788	415.544	691.428	697.126	434.344	690.747	718.79	363.066	636.955	671.436	418.655	677.943	666.963	488.392	697.895	607.137	445.64	675.959	683.677	347.397	757.229	724.061	418.557	760.842	741.193	535.509	837.517	785.293	489.763	719.837	838.362	391.825	678.698	718.077	418.087	720.043	655.898	462.46	706.837	684.918	450.696	719.078	713.211	350.026
	32	619.067	645.573	490.67	663.99	665.518	489.562	690.073	694.929	520.796	688.636	716.287	461.96	634.557	667.996	503.32	675.696	663.86	570.216	697.247	604.215	529.688	674.642	679.687	447.665	754.798	721.555	506.14	759.063	737.171	628.377	837.118	782.127	595.975	716.922	833.763	494.348	675.658	716.683	505.737	720.108	653.662	543.411	706.34	683.962	532.97	715.248	713.494	448.227
	33	615.334	641.235	547.626	662.056	664.324	540.543	689.942	692.25	583.27	684.544	713.495	536.836	632.139	663.465	566.496	673.889	661.498	624.331	693.193	603.804	586.54	675.538	677.916	527.414	753.209	720.605	568.858	757.241	734.18	693.295	835.518	776.576	668.889	715.191	833.023	575.917	675.49	714.58	571.228	717.183	651.61	598.876	705.474	682.357	587.674	714.874	708.745	524.488
	34	610.725	639.697	584.864	661.897	663.12	572.461	689.421	690.885	619.617	682.371	711.856	588.732	627.624	660.148	608.745	669.625	660.867	657.154	688.478	601.697	622.18	672.832	677.818	580.48	750.892	719.164	608.392	754.486	732.521	732.512	832.208	771.963	715.093	713.719	833.65	630.036	673.625	710.153	611.241	717.024	650.159	636.07	703.701	680.966	622.705	713.249	705.447	577.831
	35	603.051	636.612	606.756	661.037	660.443	594.909	687.738	689.468	642.567	681.865	711.703	619.57	624.582	658.781	635.121	666.949	660.135	675.81	686.002	599.358	644.462	672.431	680.241	612.894	748.654	717.741	633.152	751.638	731.998	756.005	830.305	770.09	742.36	712.439	832.685	663.832	674.316	708.864	639.323	715.432	648.913	659.911	701.906	678.831	643.529	713.922	702.439	611.917
	36	597.636	634.39	618.275	658.375	658.385	605.062	687.032	689.932	653.656	681.398	708.679	634.995	623.057	658.024	646.247	664.431	659.815	686.566	686.091	596.497	656.649	669.649	677.545	634.292	745.403	715.975	644.486	749.036	728.196	765.259	829.2	768.603	754.583	711.672	830.424	682.189	669.965	705.914	655.252	713.187	648.882	672.789	698.721	677.37	655.235	712.205	702.709	630.016
	37	593.956	632.55	624.465	655.933	655.997	606.925	685.336	688.66	660.234	681.277	705.391	644.948	620.998	657.509	650.06	664.324	655.918	691.458	687.223	594.6	663.102	668.153	674.086	644.324	741.846	712.206	649.393	745.82	723.994	769.92	828.749	767.15	758.042	708.972	825.707	689.925	669.363	702.785	664.725	710.192	648.522	677.868	695.436	673.174	660.431	711.432	702.992	637.756
	38	590.28	628.97	626.222	655.165	654.86	603.756	683.026	686.217	660.298	676.794	702.968	646.53	618.881	655.616	649.13	662.406	654.178	693.478	685.423	594.825	662.173	665.635	668.237	651.142	739.249	709.052	645.901	743.218	718.202	769.456	826.561	763.726	756.023	705.821	822.831	690.954	666.372	699.673	666.828	707.198	645.66	676.069	691.138	670.14	659.157	709.716	701.738	637.019
	39	587.854	626.42	625.547	653.388	652.363	601.8	679.83	683.906	659.271	672.308	700.329	647.151	615.642	653.439	647.175	661.334	651.982	692.6	682.641	593.227	659.526	663.029	667.833	650.754	735.661	705.69	645.96	738.753	714.36	768.519	822.804	759.227	756.502	703.296	820.157	687.551	665.37	698.416	664.241	705.715	642.849	674.766	688.94	664.248	659.395	709.933	702.933	638.626
	40	587.01	623.085	622.473	648.916	649.445	600.262	676.53	684.325	660.785	668.054	695.332	643.266	613.328	650.446	645.693	661.385	650.396	689.267	676.978	589.388	656.836	658.797	669.638	653.566	731.025	704.517	646.987	732.674	709.44	766.42	817.482	752.829	757.73	702.126	820	682.802	662.917	697.832	657.354	703.575	641.108	673.589	687.342	657.874	660.874	710.364	706.867	641.19
[truncated: 48 more columns]

## Sheet: Quantification Cq Results
	Well	Fluor	Target	Content	Sample	Biological Set Name	Cq	Cq Mean	Cq Std. Dev	Starting Quantity (SQ)	Log Starting Quantity	SQ Mean	SQ Std. Dev	Set Point	Well Note
	A01	SYBR	O/N	Unkn	Actin		15.5191	15.5191	0				0	60
	A02	SYBR	O/N	Unkn	GAPDH		15.5181	15.5181	0				0	60
	A03	SYBR	O/N	Unkn	SAUR10		26.8661	26.8661	0				0	60
	A04	SYBR	3h	Unkn	Actin		15.1906	15.1906	0				0	60
	A05	SYBR	3h	Unkn	GAPDH		15.0825	15.0825	0				0	60
	A06	SYBR	3h	Unkn	SAUR10		26.9838	26.9838	0				0	60
	A07	SYBR	6h	Unkn	Actin		15.2331	15.2331	0				0	60
	A08	SYBR	6h	Unkn	GAPDH		15.5085	15.5085	0				0	60
	A09	SYBR	6h	Unkn	SAUR10		27.0546	27.0546	0				0	60
	A10	SYBR	0h	Unkn	Actin		15.591	15.591	0				0	60
	A11	SYBR	0h	Unkn	GAPDH		15.3053	15.3053	0				0	60
	A12	SYBR	0h	Unkn	SAUR10		27.4983	27.4983	0				0	60
	B01	SYBR	O/N	Unkn	Actin		15.5943	15.5943	0				0	60
	B02	SYBR	O/N	Unkn	GAPDH		15.492	15.492	0				0	60
	B03	SYBR	O/N	Unkn	SAUR10		27.0578	27.0578	0				0	60
	B04	SYBR	3h	Unkn	Actin		15.337	15.337	0				0	60
	B05	SYBR	3h	Unkn	GAPDH		15.1514	15.1514	0				0	60
	B06	SYBR	3h	Unkn	SAUR10		26.4019	26.4019	0				0	60
	B07	SYBR	6h	Unkn	Actin		15.3288	15.3288	0				0	60
	B08	SYBR	6h	Unkn	GAPDH		15.7572	15.7572	0				0	60
	B09	SYBR	6h	Unkn	SAUR10		26.7716	26.7716	0				0	60
	B10	SYBR	0h	Unkn	Actin		15.7568	15.7568	0				0	60
	B11	SYBR	0h	Unkn	GAPDH		15.3029	15.3029	0				0	60
	B12	SYBR	0h	Unkn	SAUR10		27.8462	27.8462	0				0	60
	C01	SYBR	O/N	Unkn	Actin		15.1531	15.1531	0				0	60
	C02	SYBR	O/N	Unkn	GAPDH		15.3069	15.3069	0				0	60
	C03	SYBR	O/N	Unkn	SAUR10		26.989	26.989	0				0	60
	C04	SYBR	3h	Unkn	Actin		15.1361	15.1361	0				0	60
	C05	SYBR	3h	Unkn	GAPDH		15.0904	15.0904	0				0	60
	C06	SYBR	3h	Unkn	SAUR10		26.367	26.367	0				0	60
	C07	SYBR	6h	Unkn	Actin		15.0459	15.0459	0				0	60
	C08	SYBR	6h	Unkn	GAPDH		15.4204	15.4204	0				0	60
	C09	SYBR	6h	Unkn	SAUR10		26.7208	26.7208	0				0	60
	C10	SYBR	0h	Unkn	Actin		15.579	15.579	0				0	60
	C11	SYBR	0h	Unkn	GAPDH		15.0254	15.0254	0				0	60
	C12	SYBR	0h	Unkn	SAUR10		27.3985	27.3985	0				0	60
	D01	SYBR	O/N	Unkn	Actin		15.393	15.393	0				0	60
	D02	SYBR	O/N	Unkn	GAPDH		15.2934	15.2934	0				0	60
	D03	SYBR	O/N	Unkn	SAUR10		27.0494	27.0494	0				0	60
	D04	SYBR	3h	Unkn	Actin		15.2763	15.2763	0				0	60
	D05	SYBR	3h	Unkn	GAPDH		15.2711	15.2711	0				0	60
	D06	SYBR	3h	Unkn	SAUR10		26.5492	26.5492	0				0	60
	D07	SYBR	6h	Unkn	Actin		15.2689	15.2689	0				0	60
	D08	SYBR	6h	Unkn	GAPDH		15.4972	15.4972	0				0	60
	D09	SYBR	6h	Unkn	SAUR10		26.7106	26.7106	0				0	60
	D10	SYBR	0h	Unkn	Actin		15.4444	15.4444	0				0	60
	D11	SYBR	0h	Unkn	GAPDH		15.1914	15.1914	0				0	60
	D12	SYBR	0h	Unkn	SAUR10		27.6947	27.6947	0				0	60
	E01	SYBR	O/N	Unkn	SAUR12		23.532	23.532	0				0	60
	E02	SYBR	O/N	Unkn	SAUR16		23.0531	23.0531	0				0	60
	E03	SYBR	O/N	Unkn	SAUR71		22.761	22.761	0				0	60
	E04	SYBR	3h	Unkn	SAUR12		23.9671	23.9671	0				0	60
	E05	SYBR	3h	Unkn	SAUR16		23.563	23.563	0				0	60
	E06	SYBR	3h	Unkn	SAUR71		24.6693	24.6693	0				0	60
	E07	SYBR	6h	Unkn	SAUR12		24.0562	24.0562	0				0	60
	E08	SYBR	6h	Unkn	SAUR16		24.203	24.203	0				0	60
	E09	SYBR	6h	Unkn	SAUR71		23.3686	23.3686	0				0	60
	E10	SYBR	0h	Unkn	SAUR12		25.9553	25.9553	0				0	60
	E11	SYBR	0h	Unkn	SAUR16		23.4987	23.4987	0				0	60
	E12	SYBR	0h	Unkn	SAUR71		25.6924	25.6924	0				0	60
	F01	SYBR	O/N	Unkn	SAUR12		23.3327	23.3327	0				0	60
	F02	SYBR	O/N	Unkn	SAUR16		22.8184	22.8184	0				0	60
	F03	SYBR	O/N	Unkn	SAUR71		23.0403	23.0403	0				0	60
	F04	SYBR	3h	Unkn	SAUR12		24.0185	24.0185	0				0	60
	F05	SYBR	3h	Unkn	SAUR16		23.571	23.571	0				0	60
	F06	SYBR	3h	Unkn	SAUR71		24.9544	24.9544	0				0	60
	F07	SYBR	6h	Unkn	SAUR12		24.1288	24.1288	0				0	60
	F08	SYBR	6h	Unkn	SAUR16		24.2548	24.2548	0				0	60
	F09	SYBR	6h	Unkn	SAUR71		23.457	23.457	0				0	60
	F10	SYBR	0h	Unkn	SAUR12		25.995	25.995	0				0	60
	F11	SYBR	0h	Unkn	SAUR16		23.467	23.467	0				0	60
	F12	SYBR	0h	Unkn	SAUR71		25.6596	25.6596	0				0	60
	G01	SYBR	O/N	Unkn	SAUR12		23.1253	23.1253	0				0	60
	G02	SYBR	O/N	Unkn	SAUR16		22.759	22.759	0				0	60
	G03	SYBR	O/N	Unkn	SAUR71		22.8468	22.8468	0				0	60
	G04	SYBR	3h	Unkn	SAUR12		23.8042	23.8042	0				0	60
	G05	SYBR	3h	Unkn	SAUR16		23.5274	23.5274	0				0	60
	G06	SYBR	3h	Unkn	SAUR71		24.3617	24.3617	0				0	60
	G07	SYBR	6h	Unkn	SAUR12		24.261	24.261	0				0	60
	G08	SYBR	6h	Unkn	SAUR16		24.004	24.004	0				0	60
	G09	SYBR	6h	Unkn	SAUR71		23.1833	23.1833	0				0	60
	G10	SYBR	0h	Unkn	SAUR12		25.9248	25.9248	0				0	60
	G11	SYBR	0h	Unkn	SAUR16		23.2165	23.2165	0				0	60
	G12	SYBR	0h	Unkn	SAUR71		25.5604	25.5604	0				0	60
	H01	SYBR	O/N	Unkn	SAUR12		23.2664	23.2664	0				0	60
	H02	SYBR	O/N	Unkn	SAUR16		22.9752	22.9752	0				0	60
	H03	SYBR	O/N	Unkn	SAUR71		23.1582	23.1582	0				0	60
	H04	SYBR	3h	Unkn	SAUR12		24.0088	24.0088	0				0	60
	H05	SYBR	3h	Unkn	SAUR16		23.6254	23.6254	0				0	60
	H06	SYBR	3h	Unkn	SAUR71		24.7208	24.7208	0				0	60
	H07	SYBR	6h	Unkn	SAUR12		24.0779	24.0779	0				0	60
	H08	SYBR	6h	Unkn	SAUR16		24.4036	24.4036	0				0	60
	H09	SYBR	6h	Unkn	SAUR71		23.5022	23.5022	0				0	60
	H10	SYBR	0h	Unkn	SAUR12		25.7035	25.7035	0				0	60
	H11	SYBR	0h	Unkn	SAUR16		23.5029	23.5029	0				0	60
	H12	SYBR	0h	Unkn	SAUR71		26.1786	26.1786	0				0	60

## Sheet: Melt Curve Peak Results
	Well	Fluor	Target	Content	Sample	Melt Temperature	Peak Height	Begin Temperature	End Temperature	Well Note
	A01	SYBR	O/N	Unkn	Actin	83	146.635	78.5	87.5
	A02	SYBR	O/N	Unkn	GAPDH	84	158.872	80	87.5
	A03	SYBR	O/N	Unkn	SAUR10	83	112.478	76.5	87
	A04	SYBR	3h	Unkn	Actin	83	153.194	78.5	87
	A05	SYBR	3h	Unkn	GAPDH	84	163.326	80	87.5
	A06	SYBR	3h	Unkn	SAUR10	83	110.944	76	89
	A07	SYBR	6h	Unkn	Actin	83	157.179	78	87.5
	A08	SYBR	6h	Unkn	GAPDH	84	162.234	79.5	89.5
	A09	SYBR	6h	Unkn	SAUR10	83	127.456	76.5	89
	A10	SYBR	0h	Unkn	Actin	83	155.969	78	87.5
	A11	SYBR	0h	Unkn	GAPDH	84	173.36	79	87.5
	A12	SYBR	0h	Unkn	SAUR10	83	120.202	71	87
	B01	SYBR	O/N	Unkn	Actin	83	141.279	76.5	86.5
	B02	SYBR	O/N	Unkn	GAPDH	84	155.708	79.5	89.5
	B03	SYBR	O/N	Unkn	SAUR10	83	113.873	67.5	88
	B04	SYBR	3h	Unkn	Actin	83	152.015	77	87
	B05	SYBR	3h	Unkn	GAPDH	84	155.377	79.5	88.5
	B06	SYBR	3h	Unkn	SAUR10	83	119.591	77	87.5
	B07	SYBR	6h	Unkn	Actin	83	157.213	77.5	86.5
	B08	SYBR	6h	Unkn	GAPDH	84	139.734	79.5	87.5
	B09	SYBR	6h	Unkn	SAUR10	83	124.16	77	87.5
	B10	SYBR	0h	Unkn	Actin	83	150.68	76	86.5
	B11	SYBR	0h	Unkn	GAPDH	84	167.352	79.5	89
	B12	SYBR	0h	Unkn	SAUR10	83	124.456	69.5	88
	C01	SYBR	O/N	Unkn	Actin	83	166.024	78	88.5
	C02	SYBR	O/N	Unkn	GAPDH	84	160.978	80.5	89.5
	C03	SYBR	O/N	Unkn	SAUR10	83	111.66	76	88.5
	C04	SYBR	3h	Unkn	Actin	83	173.84	77.5	86.5
	C05	SYBR	3h	Unkn	GAPDH	84	180.272	80	90
	C06	SYBR	3h	Unkn	SAUR10	83	135.306	76.5	87.5
	C07	SYBR	6h	Unkn	Actin	83	176.588	77.5	87
	C08	SYBR	6h	Unkn	GAPDH	84	181.276	78	88
	C09	SYBR	6h	Unkn	SAUR10	83	135.55	68	88
	C10	SYBR	0h	Unkn	Actin	83	154.089	78	86.5
	C11	SYBR	0h	Unkn	GAPDH	84	198.636	80	87.5
	C12	SYBR	0h	Unkn	SAUR10	83	124.482	71.5	87
	D01	SYBR	O/N	Unkn	Actin	83	148.908	77.5	86.5
	D02	SYBR	O/N	Unkn	GAPDH	84	159.88	79	87.5
	D03	SYBR	O/N	Unkn	SAUR10	83	115.823	77	89
	D04	SYBR	3h	Unkn	Actin	83	161.167	77.5	86.5
	D05	SYBR	3h	Unkn	GAPDH	84	153.94	80	87.5
	D06	SYBR	3h	Unkn	SAUR10	83	119.183	75.5	87
	D07	SYBR	6h	Unkn	Actin	83	154.62	76.5	86.5
	D08	SYBR	6h	Unkn	GAPDH	84	158.569	80	88
	D09	SYBR	6h	Unkn	SAUR10	83	122.677	67.5	87.5
	D10	SYBR	0h	Unkn	Actin	83	157.089	78	86.5
	D11	SYBR	0h	Unkn	GAPDH	84	170.889	78.5	87.5
	D12	SYBR	0h	Unkn	SAUR10	83	120.391	71	87
	E01	SYBR	O/N	Unkn	SAUR12	85.5	63.6585	81	91
	E02	SYBR	O/N	Unkn	SAUR16	83.5	119.729	77.5	87
	E03	SYBR	O/N	Unkn	SAUR71	85	148.426	81	88.5
	E04	SYBR	3h	Unkn	SAUR12	86	87.1276	81	89.5
	E05	SYBR	3h	Unkn	SAUR16	83.5	137.588	79.5	88
	E06	SYBR	3h	Unkn	SAUR71	85	163.379	78	89
	E07	SYBR	6h	Unkn	SAUR12	85.5	98.7699	80.5	90
	E08	SYBR	6h	Unkn	SAUR16	83.5	131.45	78.5	88
	E09	SYBR	6h	Unkn	SAUR71	85	158.725	80.5	88.5
	E10	SYBR	0h	Unkn	SAUR12	86	76.4036	80.5	90
	E11	SYBR	0h	Unkn	SAUR16	83.5	151.812	70.5	87
	E12	SYBR	0h	Unkn	SAUR71	85	159.346	80.5	88.5
	F01	SYBR	O/N	Unkn	SAUR12	85.5	66.774	80.5	90
	F02	SYBR	O/N	Unkn	SAUR16	83.5	122.98	79	88
	F03	SYBR	O/N	Unkn	SAUR71	85	133.26	79.5	90.5
	F04	SYBR	3h	Unkn	SAUR12	86	85.4164	80	89.5
	F05	SYBR	3h	Unkn	SAUR16	83.5	134.023	79	89.5
	F06	SYBR	3h	Unkn	SAUR71	85	166.268	80.5	90
	F07	SYBR	6h	Unkn	SAUR12	85.5	90.8792	80.5	90.5
	F08	SYBR	6h	Unkn	SAUR16	83.5	127.415	79.5	88.5
	F09	SYBR	6h	Unkn	SAUR71	85	160.479	81	88.5
	F10	SYBR	0h	Unkn	SAUR12	86	75.4152	81	90.5
	F11	SYBR	0h	Unkn	SAUR16	83.5	141.643	79.5	87.5
	F12	SYBR	0h	Unkn	SAUR71	85	163.17	80.5	89
	G01	SYBR	O/N	Unkn	SAUR12	85.5	71.2383	80.5	90
	G02	SYBR	O/N	Unkn	SAUR16	83.5	130.204	78	89.5
	G03	SYBR	O/N	Unkn	SAUR71	85	143.212	80	88.5
	G04	SYBR	3h	Unkn	SAUR12	86	95.5986	81	90.5
	G05	SYBR	3h	Unkn	SAUR16	83.5	154.274	78	88
	G06	SYBR	3h	Unkn	SAUR71	85	188.182	80	89.5
	G07	SYBR	6h	Unkn	SAUR12	85.5	98.9793	80	89.5
	G08	SYBR	6h	Unkn	SAUR16	83.5	155.581	79	88.5
	G09	SYBR	6h	Unkn	SAUR71	85	184.439	81	88.5
	G10	SYBR	0h	Unkn	SAUR12	86	92.9244	80	92.5
	G11	SYBR	0h	Unkn	SAUR16	83.5	179.192	70	87.5
	G12	SYBR	0h	Unkn	SAUR71	85	184.446	81	88.5
	H01	SYBR	O/N	Unkn	SAUR12	85.5	65.2194	81	90
	H02	SYBR	O/N	Unkn	SAUR16	83.5	113.878	79.5	86.5
	H03	SYBR	O/N	Unkn	SAUR71	85	128.919	81	88.5
	H04	SYBR	3h	Unkn	SAUR12	86	87.1994	80.5	90
	H05	SYBR	3h	Unkn	SAUR16	83.5	142.243	79	88.5
	H06	SYBR	3h	Unkn	SAUR71	85	171.549	81	89
	H07	SYBR	6h	Unkn	SAUR12	85.5	90.827	79.5	91
	H08	SYBR	6h	Unkn	SAUR16	83.5	135.019	77	87.5
	H09	SYBR	6h	Unkn	SAUR71	85	180.306	80.5	88.5
	H10	SYBR	0h	Unkn	SAUR12	86	78.1651	80	89.5
	H11	SYBR	0h	Unkn	SAUR16	83.5	166.308	78.5	87
	H12	SYBR	0h	Unkn	SAUR71	85	163.121	79	89

## Sheet: Melt Curve RFU Results
	Temperature	A1	A2	A3	A4	A5	A6	A7	A8	A9	A10	A11	A12	B1	B2	B3	B4	B5	B6	B7	B8	B9	B10	B11	B12	C1	C2	C3	C4	C5	C6	C7	C8	C9	C10	C11	C12	D1	D2	D3	D4	D5	D6	D7	D8	D9	D10	D11	D12
	65	3005.96	3005.4	2932.83	2995.01	3033	2957.06	3033.82	3071.58	2966.72	3028.14	3101.88	2925.85	2984.72	3024.58	2962.47	3018.36	3026.92	2998.21	3046.92	2970.95	2961.94	3001.92	3047.44	2978.42	3099.9	3090.4	2940.36	3109.28	3142.31	3060.33	3152.23	3150.67	3060.21	3053.79	3190.27	2977.16	3021.34	3091.95	2959.85	3060.51	2985.34	2963.86	3036.78	3036.74	2983.39	3047.28	3052.37	2945.16
	65.5	3006.05	3005.57	2931.7	2994.66	3033.03	2956.98	3034.55	3069.16	2965.13	3027.3	3101.18	2925.33	2983.39	3024.25	2959.42	3015.87	3024.38	2993.67	3044.79	2969.28	2961.12	3001.76	3046.51	2976.7	3099.25	3087.61	2939.3	3107	3140.83	3058.22	3148.06	3148.54	3057.68	3051.31	3188.27	2975.39	3019.64	3087.83	2956.66	3059.53	2983.74	2963.63	3034.74	3035.04	2981.64	3045.04	3050.81	2943.38
	66	3006.13	3005.74	2930.58	2994.31	3033.06	2956.9	3035.27	3066.73	2963.54	3026.46	3100.48	2924.81	2982.06	3023.92	2956.36	3013.38	3021.85	2989.13	3042.65	2967.61	2960.31	3001.59	3045.57	2974.98	3098.6	3084.83	2938.25	3104.73	3139.35	3056.12	3143.89	3146.41	3055.16	3048.84	3186.27	2973.61	3017.94	3083.71	2953.48	3058.56	2982.13	2963.4	3032.7	3033.34	2979.9	3042.79	3049.25	2941.61
	66.5	3006.22	3005.91	2929.45	2993.95	3033.09	2956.82	3035.99	3064.3	2961.95	3025.61	3099.78	2924.28	2980.74	3023.6	2953.31	3010.89	3019.32	2984.59	3040.52	2965.93	2959.5	3001.43	3044.63	2973.26	3097.95	3082.05	2937.19	3102.46	3137.86	3054.01	3139.71	3144.28	3052.63	3046.36	3184.28	2971.83	3016.23	3079.58	2950.29	3057.58	2980.52	2963.16	3030.66	3031.64	2978.15	3040.55	3047.69	2939.83
	67	3006.3	3006.07	2928.33	2993.6	3033.12	2956.74	3036.72	3061.87	2960.36	3024.77	3099.08	2923.76	2979.41	3023.27	2950.26	3008.4	3016.78	2980.05	3038.38	2964.26	2958.69	3001.27	3043.7	2971.54	3097.3	3079.27	2936.13	3100.18	3136.38	3051.91	3135.54	3142.14	3050.11	3043.88	3182.28	2970.06	3014.53	3075.46	2947.1	3056.6	2978.92	2962.93	3028.62	3029.94	2976.4	3038.3	3046.13	2938.06
	67.5	3006.39	3006.24	2927.2	2993.25	3033.15	2956.66	3037.44	3059.44	2958.77	3023.93	3098.39	2923.24	2978.08	3022.94	2947.2	3005.91	3014.25	2975.52	3036.25	2962.59	2957.87	3001.11	3042.76	2969.81	3096.65	3076.49	2935.07	3097.91	3134.9	3049.8	3131.37	3140.01	3047.58	3041.4	3180.28	2968.28	3012.83	3071.34	2943.91	3055.63	2977.31	2962.69	3026.58	3028.24	2974.66	3036.06	3044.57	2936.28
	68	3006.47	3006.41	2926.08	2992.9	3033.18	2956.58	3038.17	3057.01	2957.19	3023.09	3097.69	2922.71	2976.75	3022.61	2944.15	3003.42	3011.72	2970.98	3034.12	2960.92	2957.06	3000.94	3041.83	2968.09	3095.99	3073.71	2934.02	3095.64	3133.41	3047.7	3127.2	3137.88	3045.06	3038.93	3178.28	2966.5	3011.12	3067.21	2940.73	3054.65	2975.71	2962.46	3024.53	3026.54	2972.91	3033.81	3043.01	2934.51
	68.5	3006.6	3006.82	2925.15	2992.57	3034.06	2956.34	3039.06	3054.28	2956.16	3022.27	3097.82	2922.4	2974.71	3021.51	2940.8	3000.34	3009.29	2966.49	3031.61	2958.95	2955.9	2999.95	3041.39	2967.19	3094.83	3070.34	2933.23	3092.87	3131.56	3045.05	3123.03	3134.95	3042.39	3036.22	3176.77	2965.29	3008.84	3062.56	2937.06	3053.09	2973.84	2961.7	3022.5	3024.26	2970.78	3032.24	3042.32	2933.23
	69	3006.53	3007.75	2924.29	2992.49	3034.96	2955.88	3039.69	3051.43	2955.67	3021.48	3097.8	2922.98	2971.87	3020.08	2937.19	2997.02	3006.78	2961.69	3028.67	2956.32	2954.95	2999.29	3041.52	2966.33	3092.94	3066.46	2932.69	3089.33	3129.5	3041.89	3118.85	3131.31	3038.73	3033.54	3175.12	2963.95	3005.83	3057.04	2932.88	3050.65	2971.49	2960	3020.11	3021.4	2968.47	3031.24	3042.31	2932.66
	69.5	3005.47	3008.64	2923.01	2992.53	3036.27	2954.9	3039.7	3048.43	2955.65	3020.48	3097.96	2924.02	2968.46	3017.72	2933.47	2993.65	3004.02	2956.71	3025.45	2952.94	2953.91	2998.53	3041.6	2965.73	3089.91	3061.74	2931.75	3085.31	3126.96	3038.04	3114.26	3126.98	3034.43	3030.63	3173.96	2962.54	3002.3	3050.8	2928.13	3047.27	2968.61	2957.36	3016.59	3017.7	2965.6	3030.97	3042.73	2932.83
	70	3003.45	3009.17	2921.45	2992.43	3037.62	2953.22	3039.07	3044.98	2955.71	3019.26	3098.58	2925.06	2963.54	3014.31	2929.6	2989.86	3001.27	2951.79	3021.73	2949.36	2952.7	2997.02	3041.45	2965.39	3085.59	3056.01	2930.25	3080.93	3123.67	3033.22	3109.11	3121.69	3029.9	3027.49	3173.07	2961.29	2997.78	3044.32	2922.48	3043.05	2965.44	2953.25	3012.02	3013.11	2962.22	3031.15	3043.65	2932.97
	70.5	2999.75	3009.32	2919.34	2991.93	3038.5	2950.18	3036.76	3041.27	2955.09	3017.56	3098.8	2925.95	2957.33	3009.22	2925.33	2985.57	2998.2	2946.4	3017.01	2944.6	2950.29	2994.48	3041.06	2964.63	3079.53	3048.72	2927.44	3075.79	3119.48	3026.91	3103.04	3115.24	3024.29	3023.28	3172.11	2959.7	2991.41	3037.43	2916.26	3037.77	2961.74	2947.6	3006.08	3007.47	2958.06	3031.07	3044.74	2933.47
	71	2994.38	3008.23	2916.16	2990.02	3038.17	2945.82	3033.02	3036.98	2953.7	3014.88	3097.98	2925.99	2949.83	3002.98	2920.96	2981.02	2994.09	2940.44	3011.29	2938.83	2946.83	2991.33	3040.33	2963.89	3071.95	3040.33	2923.2	3070.14	3114.18	3019.5	3095.57	3107.57	3017.49	3018.4	3170.95	2957.91	2983.48	3029.51	2909.16	3031.63	2957.59	2940.77	2998.59	3000.83	2953.02	3030.26	3045.97	2933.93
	71.5	2987.09	3005.03	2911.66	2986.69	3036.3	2939.81	3027.47	3031.56	2951.07	3010.92	3096.05	2924.15	2941.48	2995.02	2915.81	2976.05	2989.02	2933.54	3004.84	2931.98	2941.68	2986.8	3038.69	2962.79	3062.77	3030.26	2916.94	3063.9	3107.62	3010.76	3087.19	3098.81	3010.07	3012.28	3169.52	2956.28	2974.04	3020.86	2901.24	3024.23	2952.91	2932.61	2989.7	2992.51	2946.5	3028.48	3046.54	2933.66
	72	2978.56	3000.07	2905.61	2981.25	3032.43	2932.18	3019.99	3024.94	2946.71	3005.31	3092.4	2920.29	2931.99	2985.53	2910.12	2970.37	2983.14	2925.91	2997.68	2924.06	2934.65	2980.9	3036.73	2960.85	3052.43	3019.39	2909.12	3057.06	3099.97	3000.82	3077.69	3088.66	3001.58	3005.48	3167.08	2954.57	2963.32	3011.5	2892.9	3015.67	2947.46	2923.12	2980.18	2983.48	2939.17	3025.68	3046.44	2932.34
	72.5	2968.73	2993.13	2897.91	2973.46	3026.31	2923.01	3010.91	3016.97	2940.98	2998.11	3086.55	2914.3	2922.21	2974.71	2903.52	2963.93	2975.86	2917.14	2989.83	2914.54	2926.02	2973.79	3033.28	2957.95	3041.19	3007.54	2899.16	3048.97	3091.16	2989.9	3067.33	3077.74	2991.77	2997.38	3163.27	2952.03	2951.8	3001.03	2884.04	3005.9	2940.82	2912.66	2969.89	2973.6	2930.36	3021.27	3044.51	2929.68
	73	2958.44	2984.17	2888.75	2963.87	3018.24	2913.16	3000.64	3007.72	2933.66	2989.09	3078.98	2906.18	2912.13	2963.53	2895.72	2956.59	2967.25	2907.68	2981.22	2904.17	2916.06	2965.58	3028.93	2954.04	3029.31	2995.48	2887.97	3039.85	3081.19	2977.99	3056.13	3066.01	2981.41	2988.95	3157.87	2948.58	2940.32	2989.77	2874.62	2995.53	2933.07	2901.65	2959.09	2962.98	2920.6	3015.83	3041.21	2925.4
	73.5	2947.67	2973.72	2878.32	2953.58	3008.47	2902.57	2989.56	2997.45	2924.72	2978.54	3069.33	2896.35	2902	2951.46	2886.74	2948.31	2958.11	2897.33	2972.35	2893.13	2904.98	2956.43	3022.82	2947.92	3016.82	2982.9	2875.74	3029.2	3070.39	2965.34	3044.75	3053.83	2970.49	2979.64	3150.47	2943.39	2928.93	2978.51	2864.78	2984	2924.06	2889.87	2948.04	2951.78	2910.47	3008.76	3035.62	2919.35
	74	2936.91	2962.54	2867.16	2942.3	2997.8	2891.81	2977.85	2986.46	2914.1	2966.99	3058.51	2885.54	2891.46	2939.37	2876.95	2938.7	2948.26	2886.43	2962.75	2881.9	2893.2	2946.28	3015.32	2940.01	3004.24	2970.64	2863.3	3017.85	3058.86	2952.03	3032.82	3041.17	2958.85	2969.67	3141.33	2936.46	2917.73	2967.14	2854.42	2972.2	2913.97	2877.96	2937.08	2940.72	2900.2	3000.17	3028.34	2911.33
	74.5	2925.7	2950.86	2855.74	2931.09	2986.45	2880.91	2966.07	2974.9	2902.6	2955.08	3047.15	2873.89	2880.94	2927.42	2866.16	2928.15	2937.64	2874.79	2952.5	2870.71	2881.27	2935.78	3005.69	2930.61	2991.62	2958.24	2850.33	3005.38	3046.69	2938.37	3020.59	3028.31	2946.9	2958.7	3130.27	2927.41	2906.69	2955.89	2843.43	2960.18	2903.29	2866.22	2925.84	2929.3	2889.31	2989.95	3019.28	2901.61
	75	2914.43	2938.99	2844.21	2920.03	2974.9	2870.01	2953.97	2963.41	2890.4	2942.88	3035.25	2861.85	2870.5	2915.8	2854.84	2917.2	2926.78	2862.93	2941.57	2859.87	2869.08	2925.17	2995.57	2920.05	2978.84	2946.34	2837.86	2992.66	3034.25	2924.53	3008.16	3014.94	2934.89	2947.35	3117.75	2916.97	2895.86	2944.8	2832	2948.03	2892.45	2854.62	2914.72	2917.66	2878.69	2978.94	3008.88	2891.06
	75.5	2903.01	2927.31	2832.79	2909.02	2962.97	2858.93	2941.93	2951.86	2877.95	2930.91	3022.78	2849.51	2860.21	2904.05	2843.44	2906.16	2915.74	2850.67	2930.54	2849.41	2857.47	2914.31	2984.16	2908.43	2966.32	2934.62	2825.6	2979.94	3021.72	2911.13	2995.61	3001.32	2922.3	2934.88	3104.39	2905.32	2885.19	2933.43	2820.27	2935.7	2881.54	2842.88	2903.88	2906.28	2867.99	2966.89	2997.38	2879.32
	76	2891.43	2915.74	2821.38	2897.91	2951.1	2848.09	2929.68	2940.23	2865.6	2919.17	3010.61	2837.26	2850	2892.83	2831.78	2894.92	2904.44	2838.41	2919.23	2839.13	2845.9	2903.23	2972.56	2896.39	2953.99	2923.1	2813.49	2967.77	3009.3	2897.69	2982.86	2987.94	2909.15	2922.32	3090.38	2893.2	2874.55	2921.64	2808.59	2923.83	2870.68	2831.17	2893.12	2895.06	2856.76	2954.66	2984.93	2866.7
	76.5	2879.93	2904.27	2809.96	2886.8	2939.22	2837.07	2917.96	2928.59	2853.66	2907.49	2998.34	2824.89	2840.03	2881.67	2819.98	2883.95	2892.84	2826.33	2908.14	2828.83	2834.61	2892.45	2960.35	2884.11	2941.96	2911.65	2801.17	2955.57	2997.02	2884.49	2969.94	2974.8	2895.79	2909.97	3076	2880.58	2863.94	2909.54	2796.99	2912.16	2860.12	2819.23	2882.41	2883.73	2845.09	2942.34	2971.99	2854.1
	77	2868.87	2892.79	2798.49	2875.74	2927.47	2825.92	2906.38	2917.13	2841.69	2895.67	2985.6	2812.45	2830.23	2870.45	2808.09	2873	2881.51	2814.56	2897.26	2818.59	2823.21	2881.18	2948.14	2871.88	2929.76	2900.24	2788.83	2943.7	2984.92	2871.13	2957.03	2962.01	2881.95	2898.01	3062.01	2867.3	2853.41	2897.19	2785.53	2900.66	2849.33	2806.99	2871.6	2872.54	2833.32	2930.37	2959.25	2841.62
	77.5	2857.89	2881.34	2786.46	2864.7	2915.86	2814.55	2895.19	2905.36	2829.34	2883.98	2973.14	2799.9	2820.03	2859.27	2795.62	2862.01	2870.26	2802.35	2886.75	2808.64	2811.83	2869.81	2935.9	2858.97	2917.9	2888.81	2776.08	2932.34	2972.73	2857.35	2944.13	2949.76	2867.5	2885.89	3048.14	2853.1	2842.99	2885.01	2773.85	2889.49	2838.43	2794.21	2860.7	2861.53	2820.85	2918.36	2947	2828.59
	78	2847.11	2869.94	2773.62	2853.86	2904.56	2802.81	2884.32	2893.85	2816.77	2872.29	2960.97	2787.02	2809.58	2848.49	2782.61	2850.92	2859.31	2789.56	2876.1	2799.07	2799.8	2858.34	2924.09	2845.52	2905.87	2877.1	2762.96	2920.6	2960.38	2842.65	2931.22	2937.75	2852.32	2874.59	3034.41	2838.51	2832.35	2873.15	2761.57	2878.21	2827.77	2780.9	2849.69	2850.42	2807.85	2906.56	2934.67	2814.97
	78.5	2836.56	2858.65	2760.37	2842.84	2893.25	2790.01	2873.73	2882.46	2803.86	2860.51	2948.93	2773.38	2799.17	2837.76	2769.16	2839.85	2848.38	2775.78	2865.17	2789.48	2787.35	2846.88	2912.53	2831.92	2893.87	2865.46	2749.34	2908.37	2947.73	2827.22	2917.88	2925.46	2836.53	2863.24	3021.18	2823.06	2821.48	2861.74	2748.57	2866.76	2817.19	2766.86	2838.43	2839.29	2794.1	2894.76	2923.48	2801.1
	79	2825.58	2847.63	2746.18	2831.94	2881.9	2776.5	2862.2	2871.36	2790.16	2848.02	2937.05	2758.98	2788.48	2827.02	2755.06	2828.48	2837.85	2760.79	2853.41	2780.11	2774.3	2834.82	2901.7	2817.83	2881.23	2853.81	2735.06	2895.53	2934.95	2810.88	2903.98	2912.98	2819.8	2850.7	3008.15	2806.6	2810.32	2850.71	2734.72	2854.64	2806.56	2752.11	2826.25	2828.37	2780.31	2882.22	2912.26	2786.41
	79.5	2813.7	2836.81	2730.92	2820.06	2870.63	2762.09	2849.85	2860.22	2775.61	2834.82	2925.43	2744.05	2776.88	2816.41	2739.9	2816.8	2827.19	2744.73	2840.24	2771.02	2760.6	2822.03	2891.41	2802.53	2867.9	2842.31	2719.88	2881.96	2921.91	2793.55	2889.11	2900.31	2801.97	2836.95	2994.95	2789.85	2798.45	2839.82	2719.6	2841.86	2796.01	2736.03	2813.25	2817.68	2765.82	2868.85	2900.76	2770.73
	80	2800.75	2826.28	2714.93	2807.39	2859.35	2746.8	2836.06	2849.27	2759.98	2819.78	2913.27	2727.78	2764.78	2805.81	2723.94	2804.13	2816.55	2728.13	2825.2	2761.79	2745.46	2807.28	2880.87	2786.14	2853.25	2830.41	2703.36	2866.31	2909.15	2775	2872.47	2887.36	2782.41	2821.78	2981.82	2772.07	2785.46	2828.67	2703.39	2827.66	2785.82	2718.81	2798.57	2807.15	2750.78	2853.95	2889.05	2753.82
	80.5	2784.83	2815.62	2697.36	2791.57	2847.93	2729.59	2818.41	2837.84	2742.15	2800.77	2900.63	2708.77	2749.79	2794.84	2705.99	2788.51	2805.52	2709.89	2806.02	2751.68	2727.48	2788.84	2870.2	2767.06	2835.61	2818.93	2684.61	2847.12	2896.5	2754.1	2851.14	2874.55	2760.29	2801.94	2968.44	2750.8	2769.57	2817.53	2685.2	2810.42	2775.35	2699.57	2779.85	2796.69	2733.41	2834.67	2877.06	2734.54
	81	2762.4	2804.62	2675.77	2768.84	2836.29	2708.72	2792.35	2825.8	2718.72	2773.69	2887.25	2684.28	2728.45	2783.28	2683.7	2765.62	2794.21	2687.87	2778.38	2741.12	2704.14	2762.35	2858.72	2741.69	2810.45	2807.3	2661.5	2819.36	2883.35	2727.97	2820.22	2861.3	2732.28	2772.88	2954.2	2723.3	2747.31	2805.7	2662.76	2785.51	2764.51	2676.09	2752.65	2785.65	2711.01	2806.25	2863.97	2709.63
	81.5	2728	2791.81	2647.07	2733	2823.08	2680.6	2753.02	2811.72	2686.33	2733.87	2871.74	2650.99	2695.38	2770.54	2653.71	2729.97	2781.29	2658.41	2737.21	2728.38	2671.55	2722.84	2844.88	2706.77	2771.85	2794.6	2630.88	2776.68	2868.27	2692.54	2773.95	2845.39	2694.24	2730.58	2937.54	2686.73	2713	2792.2	2632.25	2747.22	2752.06	2644.42	2712.1	2772.28	2679.05	2764.34	2849.34	2675.81
	82	2679.57	2772.66	2608.95	2682.42	2803.08	2643.25	2698.59	2790.12	2642.85	2678.94	2848.41	2606.82	2648.9	2751.39	2614.22	2679.4	2761.44	2618.61	2681.08	2707.79	2627.82	2668.99	2823.17	2660.79	2717.56	2775.68	2591.17	2716.93	2845.19	2645.44	2710.65	2819.97	2644.78	2673.89	2911.8	2639.06	2664.21	2772.28	2592.02	2692.9	2732.82	2603.14	2656.58	2750.29	2636.24	2707.26	2827	2631.36
	82.5	2618.07	2740.19	2561.69	2617.75	2769.93	2596.52	2630.18	2754.92	2588.85	2610.89	2811.14	2553.08	2589.27	2719.57	2565.53	2615	2728.81	2568.29	2611.35	2674.6	2574.01	2602.79	2787.99	2605.16	2648.07	2744.62	2543.08	2641.95	2806.57	2587.37	2632.09	2778.61	2585.07	2604.39	2869.6	2582.22	2601.51	2739.75	2542.52	2624.16	2700.04	2552.23	2588.02	2714.19	2582.87	2636.61	2790.45	2577.32
	83	2547.32	2691.84	2507.4	2543.44	2720.49	2542.9	2552.97	2703.56	2526.91	2534.32	2756.72	2493.66	2520.97	2672.21	2510.44	2540.95	2680.96	2510.62	2533.64	2627.77	2513.41	2528.67	2736.06	2543.74	2567.73	2697.14	2488.86	2556.88	2749.96	2521.6	2544.65	2718.84	2518.46	2527.7	2807.54	2520.36	2529.51	2690.95	2486.47	2545.49	2651.88	2494.44	2511.5	2661.85	2522.82	2558.51	2737.18	2517.76
	83.5	2474.76	2628.31	2451.36	2468.11	2655	2487.72	2476.64	2636.75	2463.92	2458.38	2685.72	2435.23	2451.19	2610.04	2453.84	2466.56	2618.14	2450.96	2457.68	2568.11	2452.24	2455.55	2667.91	2483.07	2485.88	2633.81	2433.62	2472.21	2676.14	2454.74	2459.54	2641.87	2452.24	2453.84	2726.3	2460.13	2455.95	2626.84	2429	2466.79	2588.99	2435.38	2436.99	2594.84	2462.68	2483.08	2667.49	2459.25
	84	2412.91	2552.15	2401.18	2404.48	2576.57	2438.51	2413.37	2557.81	2408.1	2394.71	2601.64	2385.24	2391.96	2535.13	2403.91	2403.97	2542.96	2397.51	2395.01	2499.13	2398.65	2395.15	2586.8	2430.8	2416.2	2556.81	2385.45	2402.06	2588.74	2396.25	2389.8	2552.64	2395.39	2394	2629.86	2409.18	2393.1	2550.08	2378.8	2400.88	2514.23	2383.45	2376.09	2516.84	2410.79	2421.57	2584.48	2409.14
	84.5	2367.39	2473.42	2362.45	2358.02	2495.67	2400.26	2367.92	2478.58	2365.23	2348.91	2516.65	2348.24	2348.62	2458.24	2365.9	2358.34	2466.68	2356.4	2350.41	2431.97	2357.66	2352.01	2504.6	2392.11	2364.68	2476.84	2348.75	2351.72	2500.45	2351.88	2339.98	2465.13	2352.52	2351.69	2532.53	2371.63	2347.13	2470.86	2340.59	2353.69	2439.06	2343.8	2333.4	2440.33	2371.55	2378.02	2500.86	2371.91
	85	2337.69	2406.03	2336.19	2328.47	2425.8	2374.41	2339.83	2411.61	2335.75	2319.98	2444.37	2324.38	2321.2	2392.04	2340.39	2329.67	2401.5	2328.83	2323.26	2377.05	2330.07	2325.02	2433.72	2366.61	2331.66	2407.25	2323.97	2320.57	2426.09	2322.17	2309.42	2392.62	2324.55	2325.87	2449.2	2347.12	2318.34	2402.42	2314.88	2324.51	2376.07	2317.37	2307.46	2377.15	2345.78	2351.75	2429.44	2348.06
	85.5	2322.13	2356.27	2321.41	2313.83	2374.01	2359.65	2326.55	2362.71	2318.6	2305.63	2391.58	2311.79	2307.66	2343.09	2325.75	2315.77	2353.5	2313	2310.41	2337.92	2314.4	2311.57	2380.96	2352.25	2314.78	2355.7	2310.21	2305.67	2371.79	2305.82	2295.03	2340.34	2309.52	2314.06	2387.97	2334.03	2303.73	2352.03	2300.4	2310.65	2330.45	2302.74	2295.47	2331.97	2331.48	2339.7	2376.97	2335.26
	86	2316.93	2324.23	2314.96	2309.17	2340.94	2352.77	2322.93	2332	2310.54	2301.07	2358.48	2306.77	2303.9	2311.41	2319.78	2311.63	2322.66	2306.23	2306.25	2314.01	2307.37	2307.5	2347.2	2346.12	2309.18	2322.25	2304.52	2301.8	2337.45	2298.99	2290.63	2308.04	2303.35	2311.19	2349.31	2329.11	2299.31	2319.75	2294.47	2306.95	2301.9	2296.58	2292.26	2304.07	2325.48	2336.35	2343.63	2329.98
	86.5	2315.3	2308.52	2312.86	2308.05	2324.53	2349.75	2322.4	2317.4	2307.19	2300.11	2342.56	2304.97	2303.44	2295.75	2317.89	2310.56	2307.71	2304.11	2305.18	2303.39	2304.98	2306.45	2330.58	2344.38	2307.32	2305.66	2302.13	2300.94	2320.99	2296.35	2289.24	2293.4	2301.39	2310.96	2330.69	2327.56	2298.68	2303.73	2292.18	2306.45	2288.86	2294.56	2291.71	2291.58	2323.2	2335.73	2327.62	2328.15
	87	2314.4	2303.81	2311.96	2307.47	2319.65	2348.07	2322.16	2312.52	2305.11	2299.71	2337.5	2304.07	2303.48	2290.34	2317.01	2310.24	2302.89	2303.31	2304.52	2300.44	2304.26	2305.49	2324.85	2343.5	2306.41	2300.17	2300.87	2300.56	2316.07	2295.35	2288.31	2288.94	2300.84	2310.71	2324.48	2327.22	2298.45	2298.63	2290.94	2306.06	2285.12	2293.49	2290.69	2288.07	2322.29	2335.34	2322.14	2327.41
	87.5	2314.08	2303.18	2310.87	2306.97	2319.1	2346.72	2322.2	2311.22	2304.23	2299.7	2336.16	2303.15	2303.22	2289.02	2316.29	2309.84	2301.81	2302.82	2303.54	2299.54	2303.94	2304.72	2323.51	2342.97	2305.81	2298.71	2300.09	2300.23	2314.81	2295.07	2287.76	2288.09	2300.47	2310.68	2323.4	2327.4	2297.83	2297.57	2290.2	2305.54	2284.5	2292.49	2289.63	2287.35	2321.65	2335.11	2321.33	2326.8
	88	2313.75	2302.9	2309.81	2306.16	2319.27	2345.41	2322.13	2310.38	2303.86	2299.61	2335.23	2302.33	2302.28	2288.37	2315.92	2309.43	2301.04	2302.46	2302.6	2298.78	2304	2304.62	2323.02	2342.59	2305.33	2297.84	2299.49	2299.98	2313.94	2294.53	2286.94	2287.74	2300.18	2310.45	2322.79	2327.64	2297.61	2296.89	2289.76	2304.99	2283.88	2291.39	2288.89	2287.06	2321.23	2334.77	2321.17	2326.12
	88.5	2313.48	2302.46	2308.82	2305.47	2319.17	2344.51	2321.88	2309.67	2303.73	2299.44	2334.07	2301.29	2301.2	2287.8	2315.45	2308.92	2300.55	2301.87	2302.14	2297.88	2303.94	2304.24	2322.42	2342.48	2304.94	2297.15	2299.23	2299.28	2313.56	2294.28	2286.08	2287.55	2300.09	2309.95	2321.8	2327.38	2297.24	2296.03	2289.22	2304.18	2283.31	2290.51	2288.18	2286.9	2320.61	2334.53	2321.25	2325.48
	89	2313.31	2301.92	2307.89	2304.89	2319.12	2344.03	2321.48	2309.15	2303.61	2299.18	2333.14	2300.68	2300.37	2287.26	2314.83	2308.77	2300.34	2301.01	2301.51	2297.02	2303.58	2303.48	2322.18	2341.81	2304.79	2296.49	2299.28	2298.89	2313.22	2294.44	2285.43	2287	2299.84	2309.3	2320.76	2326.94	2296.72	2295.17	2288.94	2303.46	2282.76	2289.69	2287.47	2286.57	2319.93	2334.12	2321.24	2324.94
	89.5	2312.94	2301.32	2307	2304.31	2318.73	2343.57	2320.7	2309.09	2303.83	2298.48	2332.56	2300.07	2299.4	2286.92	2314.31	2308.32	2300.02	2300.02	2300.63	2296.08	2302.98	2303.11	2322.14	2341.51	2304.22	2296.03	2299.38	2298.21	2312.97	2293.85	2284.91	2286.55	2299.7	2308.98	2320.15	2326.2	2296.05	2294.47	2288.97	2302.6	2282.19	2289.22	2287.13	2286.18	2319.33	2333.58	2321.3	2324.52
	90	2312.32	2300.6	2306.54	2303.79	2318.17	2342.82	2319.81	2309.09	2303.55	2297.36	2332.05	2299.82	2298.97	2286.62	2314.27	2307.94	2299.7	2298.88	2300.08	2295.37	2302.41	2302.73	2322.3	2341.37	2303.48	2295.98	2299.48	2297.56	2312.89	2292.99	2284.12	2285.88	2299.48	2308.64	2319.54	2325.19	2295.8	2293.9	2288.69	2301.56	2281.55	2289.16	2286.86	2285.76	2319.05	2333.1	2321.03	2324.25
	90.5	2311.94	2299.96	2306.06	2303.39	2317.19	2342.51	2318.9	2309.28	2303.21	2296.77	2331.46	2299.13	2299.01	2286.22	2314.17	2307.51	2299.36	2297.9	2299.46	2294.83	2301.63	2301.98	2322.29	2341.71	2302.73	2295.6	2299.1	2296.61	2312.92	2292.3	2283.67	2285.24	2299.2	2308.41	2319.13	2324.14	2295.17	2293.34	2288.11	2300.66	2281.06	2289.07	2286.39	2284.96	2318.96	2332.6	2320.13	2323.98
	91	2311.45	2299.45	2305.8	2303.13	2316.28	2342.08	2318.29	2309.08	2302.55	2296.49	2330.87	2298.81	2299.22	2285.95	2314.07	2306.92	2299.03	2297.43	2298.73	2294.44	2301.05	2301.68	2322.54	2341.56	2301.86	2295.04	2298.44	2295.92	2312.47	2291.53	2283.42	2284.75	2298.48	2308.15	2319.3	2323.08	2294.72	2292.7	2287.71	2300.3	2280.39	2288.82	2285.97	2284	2318.91	2331.99	2318.95	2323.5
	91.5	2310.98	2299.07	2305.86	2302.86	2315.33	2341.53	2317.75	2308.78	2302.11	2296.28	2330.37	2298.39	2299.37	2285.62	2314.1	2306.14	2298.41	2297.5	2298.04	2294.13	2300.72	2301.67	2322.6	2341.72	2301.15	2294.6	2297.64	2295.53	2312.1	2290.44	2283.25	2284.45	2298.01	2307.7	2319.75	2322.32	2294.21	2292.27	2287.36	2300.01	2279.59	2288.89	2285.41	2283.31	2319.04	2331.77	2318.11	2323.12
	92	2310.38	2298.6	2305.87	2302.34	2314.56	2341.04	2317.82	2308.31	2301.3	2296.41	2329.55	2297.85	2299.37	2285.35	2313.96	2305.5	2297.87	2297.47	2297.6	2294.16	2300.52	2301.15	2322.27	2341.51	2300.65	2294.26	2296.45	2295.31	2311.41	2290.04	2282.96	2284.1	2297.23	2307.08	2319.89	2321.53	2293.82	2292.01	2286.76	2299.99	2279.07	2288.78	2284.79	2282.51	2318.99	2331.79	2317.37	2322.83
	92.5	2309.81	2298.01	2305.78	2301.61	2313.98	2340.74	2317.66	2307.85	2300.84	2297.04	2328.98	2297.1	2299.02	2284.85	2313.22	2304.96	2297.33	2297.53	2297.19	2294.03	2300.21	2300.95	2321.88	2341.03	2299.89	2293.59	2295.02	2295.03	2310.9	2289.74	2282.73	2283.76	2296.41	2306.37	2319.8	2321.18	2293.08	2291.65	2286.56	2300.33	2278.49	2288.13	2284.3	2281.66	2318.54	2331.72	2316.54	2322.09
	93	2308.83	2297.55	2305.55	2300.93	2313.73	2339.98	2317.56	2307.25	2300.21	2297.14	2328.35	2296.66	2298.6	2284.24	2312.43	2304.42	2296.96	2297.58	2296.89	2293.97	2299.69	2300.71	2321.59	2339.91	2299.14	2293.19	2293.9	2295.08	2310.04	2289.42	2282.27	2283.42	2295.53	2305.35	2319.77	2320.57	2292.43	2291.2	2286.62	2300.5	2278.05	2287.59	2283.87	2281.23	2317.79	2331.52	2316.12	2321.52
	93.5	2307.67	2297.08	2304.94	2299.99	2313.57	2339.25	2317.25	2307.38	2299.62	2296.77	2327.78	2295.41	2297.87	2283.47	2311.76	2304.48	2296.25	2296.96	2296.95	2294.18	2298.89	2300.22	2320.63	2338.75	2298.47	2292.77	2292.75	2295.03	2309.43	2289.07	2281.69	2282.81	2295.2	2304.31	2319.04	2320.01	2291.95	2290.99	2286.56	2300.09	2277.89	2287.06	2283.48	2280.85	2317.29	2330.98	2315.75	2321.42
	94	2306.38	2296.75	2304	2299.33	2313.51	2338.71	2317.26	2307	2298.51	2296.15	2327.5	2294.51	2296.66	2282.95	2311.21	2304.54	2295.81	2296.58	2296.91	2294.6	2297.34	2299.92	2318.54	2337.1	2298.05	2292.4	2291.89	2294.33	2308.43	2288.14	2281.4	2282.4	2295.11	2303.18	2318.73	2318.83	2291.62	2290.81	2286.73	2299.66	2278.17	2285.84	2283.75	2280.88	2316.75	2330.04	2314.88	2321.11
	94.5	2304.94	2296.58	2302.91	2298.67	2313.56	2337.92	2316.96	2306.93	2297.51	2295.18	2327.16	2293.44	2295.6	2282.24	2310.67	2304.69	2295.31	2296.16	2296.92	2294.92	2295.65	2299.74	2316.76	2335.28	2297.5	2291.95	2291.24	2293.8	2307.48	2287.15	2280.92	2281.91	2295.14	2301.92	2318.34	2317.67	2291.27	2290.35	2286.97	2298.96	2278.3	2284.68	2283.92	2281.04	2316.15	2328.77	2314.07	2320.86
	95	2303.67	2296.74	2301.92	2299.08	2313.51	2337.96	2317.45	2305.47	2295.67	2293.84	2327.86	2293.41	2293.57	2282.2	2310.86	2304.59	2295.17	2296.93	2296.4	2295.88	2292.91	2299.94	2312.21	2333.14	2298.11	2291.83	2291.16	2292.2	2305.97	2284.35	2281.88	2282.03	2296.25	2300.63	2319.28	2315.35	2291.21	2290.58	2287.68	2298.28	2279.32	2282.74	2285.44	2282.44	2315.98	2327.35	2312.51	2320.28
[truncated: 48 more columns]

## Sheet: Melt Curve Derivative Results
	Temperature	A1	A2	A3	A4	A5	A6	A7	A8	A9	A10	A11	A12	B1	B2	B3	B4	B5	B6	B7	B8	B9	B10	B11	B12	C1	C2	C3	C4	C5	C6	C7	C8	C9	C10	C11	C12	D1	D2	D3	D4	D5	D6	D7	D8	D9	D10	D11	D12
	65	-0.0849547	-0.169094	1.12461	0.351396	-0.0310463	0.0808396	-0.723777	2.42855	1.58883	0.842965	0.699014	0.523386	1.32707	0.32903	3.05403	2.48967	2.53344	4.53853	2.13385	1.67191	0.812942	0.162156	0.935796	1.72046	0.651089	2.7806	1.05738	2.27375	1.48304	2.10445	4.17179	2.13148	2.52584	2.47682	1.99728	1.77616	1.70336	4.12282	3.18758	0.976819	1.60576	0.234503	2.04175	1.70028	1.74517	2.24477	1.55966	1.77424
	65.5	-0.184068	-0.366369	2.43665	0.761358	-0.0672669	0.175152	-1.56818	5.26186	3.44247	1.82642	1.51453	1.134	2.87531	0.712899	6.61707	5.39428	5.48913	9.83347	4.62334	3.62246	1.76137	0.351338	2.02756	3.72767	1.41069	6.02463	2.29099	4.92645	3.21326	4.55965	9.03887	4.6182	5.47266	5.36644	4.32743	3.84835	3.69061	8.93277	6.90642	2.11644	3.47914	0.508089	4.42378	3.68393	3.78121	4.86368	3.37926	3.84418
	66	-0.169909	-0.338187	2.24921	0.702792	-0.0620925	0.161679	-1.44755	4.85711	3.17767	1.68593	1.39803	1.04677	2.65413	0.658061	6.10807	4.97934	5.06689	9.07705	4.26769	3.34381	1.62588	0.324312	1.87159	3.44093	1.30218	5.56119	2.11476	4.5475	2.96609	4.2089	8.34357	4.26296	5.05168	4.95363	3.99455	3.55232	3.40672	8.24564	6.37516	1.95364	3.21151	0.469005	4.08349	3.40055	3.49035	4.48955	3.11932	3.54847
	66.5	-0.169909	-0.338187	2.24921	0.702792	-0.0620925	0.161679	-1.44755	4.85711	3.17767	1.68593	1.39803	1.04677	2.65413	0.658061	6.10807	4.97934	5.06689	9.07705	4.26769	3.34381	1.62588	0.324312	1.87159	3.44093	1.30218	5.56119	2.11476	4.5475	2.96609	4.2089	8.34357	4.26296	5.05168	4.95363	3.99455	3.55232	3.40672	8.24564	6.37516	1.95364	3.21151	0.469005	4.08349	3.40055	3.49035	4.48955	3.11932	3.54847
	67	-0.169909	-0.338187	2.24921	0.702792	-0.0620925	0.161679	-1.44755	4.85711	3.17767	1.68593	1.39803	1.04677	2.65413	0.658061	6.10807	4.97934	5.06689	9.07705	4.26769	3.34381	1.62588	0.324312	1.87159	3.44093	1.30218	5.56119	2.11476	4.5475	2.96609	4.2089	8.34357	4.26296	5.05168	4.95363	3.99455	3.55232	3.40672	8.24564	6.37516	1.95364	3.21151	0.469005	4.08349	3.40055	3.49035	4.48955	3.11932	3.54847
	67.5	-0.162989	-0.298484	2.28218	0.705948	0.0786056	0.135918	-1.41846	4.80618	3.27138	1.69041	1.5374	1.08254	2.53518	0.529719	6.05926	4.88125	5.08424	9.08478	4.20555	3.2949	1.56741	0.184836	1.95514	3.57725	1.21619	5.4632	2.16051	4.46596	2.90368	4.11757	8.34385	4.1297	5.02777	4.91516	4.07512	3.64648	3.30925	8.15632	6.29583	1.85668	3.1683	0.382398	4.08456	3.30457	3.4254	4.60132	3.26266	3.63044
	68	-0.243424	-0.489803	2.06236	0.726184	-0.902782	0.277938	-1.66738	5.14336	2.70435	1.66398	0.535147	0.979852	3.23355	1.37376	6.35657	5.52659	4.95056	8.97981	4.56883	3.52656	2.01307	1.21885	1.46402	2.63049	1.69759	6.06331	1.88022	4.90713	3.30669	4.67303	8.34076	4.94465	5.03119	5.1895	3.48908	2.96557	3.87237	8.63851	6.76486	2.38784	3.38953	0.83052	4.01889	3.87876	3.8503	3.91533	2.37467	3.17564
	68.5	-0.23378	-1.3799	1.6851	0.427294	-1.84222	0.640589	-1.65687	5.60947	1.50458	1.56196	-0.223506	-0.227302	4.91261	2.49536	6.99101	6.49512	4.86997	9.25161	5.45782	4.51813	2.15198	1.77294	0.214516	1.66717	2.95432	7.21015	1.21371	6.30518	3.90114	5.7837	8.27708	6.58676	6.23858	5.38435	3.1599	2.44706	5.30066	10.1451	7.82886	3.94419	4.17338	2.38764	4.22964	5.0957	4.42138	2.57923	0.63612	1.89251
	69	0.99816	-1.96394	2.08306	-0.024142	-2.21092	1.36683	-0.700751	5.79738	0.435166	1.75052	-0.0331519	-1.7657	6.13791	3.67483	7.35285	6.66571	5.28715	9.83459	6.15119	6.09202	1.92074	1.23454	-0.333033	1.49227	4.8188	8.52426	1.35237	7.6275	4.5044	6.9292	8.68054	7.92523	8.08156	5.55095	2.88004	2.80732	6.48735	11.8568	8.86958	5.82324	5.2621	4.2549	5.78759	6.50369	5.1195	1.24183	-0.452936	0.273514
	69.5	2.96481	-1.48719	2.81726	-0.032638	-2.80661	2.52078	0.439723	6.42421	-0.236183	2.1837	-0.875039	-2.18145	8.19939	5.65567	7.53496	7.07919	5.50153	9.84838	6.82112	6.89247	2.06719	2.12305	0.0350506	0.833947	7.24353	10.3266	2.28382	8.35422	5.7552	8.53717	9.66042	9.54612	8.76244	5.90967	1.96548	2.61808	7.83094	12.7726	10.3997	7.5806	6.04875	6.64733	8.05332	8.24958	6.20207	-0.0762533	-1.38544	-0.371548
	70	5.60435	-0.823853	3.5399	0.386682	-2.43882	4.61583	2.81391	7.13239	0.420043	2.79543	-1.0963	-2.07425	11.1648	8.48013	8.14504	8.10877	5.63145	10.2025	8.35306	8.20952	3.47312	4.07316	0.521022	1.06265	10.3509	13.0006	4.16052	9.50484	7.42576	11.116	11.0832	11.6957	9.98546	7.26999	1.76392	2.76874	10.7914	13.2362	11.8702	9.50703	6.85028	9.81588	10.4271	10.2106	7.48635	-0.287005	-2.05841	-0.63704
	70.5	9.03901	0.653625	5.16734	2.24412	-0.733081	7.35189	6.03449	7.86846	1.91759	4.24261	0.484266	-1.21505	13.7919	11.3131	8.57532	8.85936	7.08331	11.2683	10.4844	10.5405	5.78073	5.6263	1.00984	1.51306	13.6583	15.6699	6.94379	10.8247	9.42569	13.7432	13.5334	14.1247	12.4873	9.06378	2.08326	3.45719	14.3626	14.7583	13.281	11.3872	7.84893	12.5193	13.4226	12.1835	9.08541	0.770793	-2.4643	-1.14814
	71	12.7292	4.19383	7.60502	5.11957	2.07329	10.3121	9.20719	9.60244	3.85264	6.52682	2.647	1.60931	15.8787	14.1306	9.45224	9.441	9.22384	12.8336	12.2177	12.6032	8.47783	7.54598	2.37112	1.69231	16.8201	18.5025	10.4765	11.8701	11.8546	16.1276	15.8891	16.4091	14.2289	11.0012	2.46092	3.44946	17.4289	16.6271	15.1009	13.4814	8.77732	14.9613	16.5344	15.0168	11.5695	2.53132	-1.93457	-0.356702
	71.5	15.9213	8.19218	10.4913	8.62149	5.61746	13.6561	13.059	11.9931	6.97268	9.522	5.38903	5.65848	17.9263	17.5264	10.8208	10.5892	10.8649	14.5004	13.6241	14.6827	12.201	10.4656	3.50579	2.94006	19.6483	21.0556	14.0492	12.9616	14.2369	18.7388	17.8942	18.9654	15.7929	12.9133	3.693	3.18555	20.2682	17.9368	16.3108	15.9607	10.0262	17.705	18.514	17.4774	13.8517	4.47923	-0.661202	1.49334
	72	18.4907	11.8626	13.7549	13.2886	9.99561	16.9602	16.6788	14.5878	10.1117	12.7829	9.50034	9.82532	19.4072	20.5032	12.1806	12.0947	13.0687	16.4161	15.0062	17.4837	15.741	13.0547	5.31447	4.81776	21.6603	22.8254	17.8452	14.8594	16.4486	20.8966	19.905	21.1629	18.3873	14.9526	6.14575	4.10532	22.4523	19.8197	17.1758	18.422	12.0296	20.0798	19.8271	18.8991	16.1196	7.20883	1.91116	3.87646
	72.5	20.2497	15.9728	16.9225	17.6433	14.2825	19.147	19.4921	17.2741	12.9986	16.2207	13.4437	14.1778	19.9023	22.0657	14.3583	13.7447	16.0396	18.2719	16.5247	20.0544	18.6678	15.3586	7.75067	6.59313	23.1628	23.9753	21.34	17.163	18.8361	22.8736	21.6712	22.7011	20.2986	16.6025	9.09941	5.83301	23.1564	21.9246	18.2991	20.1493	14.3744	21.504	21.1803	20.5441	18.7557	9.84083	5.1529	6.87251
	73	21.1368	19.6262	19.7156	20.0038	18.0227	20.5261	21.4383	19.602	16.2516	19.7092	17.308	18.148	20.1887	23.3059	16.8356	15.5485	17.8639	19.8327	17.4795	21.5098	21.1453	17.3827	10.3813	9.89574	24.4655	24.7248	23.5847	19.8268	20.8508	24.6128	22.6282	23.9594	21.261	17.6907	12.7745	8.49908	22.8909	22.6309	19.2695	21.9554	16.759	22.8592	21.9538	21.9776	20.0182	12.431	8.82791	10.2706
	73.5	21.5464	21.7916	21.7603	21.7052	20.616	21.4569	22.9082	21.341	19.6857	22.2931	20.7228	20.7908	20.6861	24.3339	18.7951	17.8931	18.9502	21.2794	18.4034	22.3814	23.0193	19.3949	13.5468	14.1585	25.1607	24.9156	24.7534	22.0727	22.3572	26.0245	23.2876	24.8937	22.6017	19.2573	16.5579	12.0527	22.5964	22.6415	20.1645	23.4917	19.2099	23.8462	22.0065	22.2968	20.3554	15.6651	12.9525	14.0768
	74	21.9557	22.953	22.69	22.6916	22.1274	21.6837	23.5505	22.6835	22.283	23.5758	22.2808	22.5563	21.1487	24.1002	20.6326	20.3163	20.5439	22.5944	19.8561	22.5154	23.7902	20.7939	17.2727	17.4203	25.1832	24.6882	25.5275	23.8922	23.7739	27.051	24.2253	25.519	23.696	20.9918	20.2564	16.0376	22.2489	22.6655	21.3648	23.843	20.9327	23.6959	22.2128	22.4124	21.2246	18.9302	16.4073	17.9325
	74.5	22.5217	23.6711	23.0129	22.2646	22.9527	21.7887	23.9044	23.1376	23.8079	24.2161	23.2628	23.7686	20.9792	23.5192	22.2616	21.6481	21.5831	23.5537	21.2763	22.0951	24.2477	21.1331	19.8959	20.0289	25.4506	24.3412	25.5574	25.3759	24.6963	27.6316	24.7002	26.2157	23.9095	22.303	23.7549	19.6466	21.868	22.2742	22.4781	24.1774	21.604	23.294	22.4479	23.171	21.6098	21.3233	19.5741	20.3558
	75	22.683	23.5919	22.9631	22.0231	23.5281	22.026	24.1542	23.0236	24.784	24.2502	24.5119	24.4609	20.7245	23.4095	22.7696	22.0181	21.892	24.1462	22.0267	21.2747	23.8448	21.4527	21.5751	22.2984	25.3567	23.5787	24.671	25.5684	25.0367	27.26	24.9745	27.1199	24.514	23.8678	26.008	22.2522	21.4778	22.3597	23.2341	24.5789	21.7751	23.3186	21.9478	23.0884	21.1911	23.1623	21.9634	22.2879
	75.5	23.0427	23.2344	22.8078	22.1087	23.8575	21.9182	24.3684	23.1837	24.9149	23.6741	24.7211	24.6264	20.5202	23.0036	23.0566	22.3407	22.3199	24.6215	22.3984	20.6687	23.1306	22.0238	23.126	23.789	24.857	23.2311	24.3072	24.884	24.9946	26.8034	25.2798	27.0809	25.8064	25.242	27.4538	23.8907	21.2883	23.1656	23.4614	24.2637	21.8297	23.432	21.5639	22.5353	21.8629	24.4394	24.0605	24.5604
	76	23.1799	23.0255	22.8244	22.2517	23.7638	21.7936	24.0297	23.3025	24.2625	23.3649	24.31	24.5987	20.1924	22.2818	23.4862	22.2422	22.9972	24.3944	22.4806	20.5503	22.8389	21.8197	23.8424	24.4035	24.3059	22.9372	24.4028	24.337	24.7024	26.6292	25.7086	26.5341	26.5291	24.9866	28.5705	24.7081	21.2531	23.9169	23.2996	23.491	21.3776	23.5979	21.4331	22.5424	22.9692	24.6383	25.5762	25.3787
	76.5	22.5616	22.934	22.7944	22.1712	23.6551	22.1688	23.2668	23.0517	23.7698	23.514	25.0698	24.8072	19.6551	22.3849	23.6194	21.8691	22.9888	23.7402	21.9881	20.5895	22.6441	21.9917	24.5137	24.4467	24.2471	22.8364	24.6288	24.1668	24.3337	26.4489	25.8704	25.9794	27.1268	24.2541	28.4448	25.8211	21.1618	24.5284	23.0202	23.1882	21.2881	24.1334	21.5018	22.5658	23.3976	24.2987	25.8358	24.9855
	77	21.9911	22.936	23.3737	22.1169	23.3863	22.4831	22.7968	23.2484	24.2993	23.5256	25.3278	24.9367	19.9347	22.4708	24.2822	21.9194	22.5736	23.8389	21.3321	20.2435	22.6889	22.7046	24.5294	25.0427	24.0513	22.7868	25.0283	23.1076	24.2385	27.0051	25.8072	25.0167	28.2507	24.1565	27.8169	27.5164	20.8929	24.6341	23.017	22.632	21.767	24.9752	21.7203	22.1619	24.1792	23.9563	24.9465	25.399
	77.5	21.7852	22.8698	24.9	21.8572	22.8862	22.9667	22.0491	23.3472	24.9337	23.353	24.6069	25.3314	20.7198	21.9545	25.5003	22.0828	22.1933	24.9053	21.0534	19.4672	23.3319	22.8577	24.0979	26.4428	23.8362	23.1655	25.8516	22.9308	24.5151	28.4371	25.7288	24.1278	29.634	23.4354	27.662	28.809	21.0065	24.0744	23.8689	22.3591	21.5913	26.0536	21.8761	22.0935	25.4569	23.8252	24.6962	26.6997
	78	21.2295	22.7323	26.0669	21.8404	22.5582	24.4806	21.2604	22.9093	25.3802	23.3531	24.196	26.4471	20.8602	21.445	26.444	22.1264	21.9019	26.4585	21.4723	19.1395	24.4878	22.8472	23.4209	27.0564	23.9535	23.3964	26.6886	23.9314	25.0024	30.1282	26.1567	24.2379	30.93	22.311	26.9634	29.9394	21.4972	23.276	25.2344	22.6372	21.19	27.327	22.1278	22.2854	26.8283	23.439	23.5333	27.4482
	78.5	21.3409	22.3171	27.3293	21.7816	22.6687	26.3431	21.927	22.4704	26.5159	24.168	23.9384	28.0739	20.9502	21.4808	27.4525	22.3835	21.4364	28.766	22.501	19.0102	25.471	23.3983	22.4425	27.5161	24.516	23.3038	27.8353	25.0236	25.4309	31.7204	27.1578	24.783	32.4325	23.6935	26.1496	31.9985	21.942	22.4022	26.7567	23.491	21.209	28.6932	23.3474	22.0893	27.558	24.1922	22.1666	28.4409
	79	22.7501	21.8389	29.4874	22.6343	22.6227	27.8956	23.795	22.2143	28.2053	25.4976	23.383	29.2375	22.2409	21.349	29.2299	22.935	21.1218	31.1595	24.7617	18.4041	26.6084	24.627	20.9577	29.2898	25.8565	23.0804	29.3514	26.1678	25.8954	33.6283	28.5685	25.1346	34.4331	26.2477	26.2203	33.21	22.895	21.8054	28.9296	24.7736	21.2489	30.7604	25.0526	21.6057	28.1905	25.7893	22.6794	30.2977
	79.5	24.477	21.2983	31.1689	24.1855	22.5146	29.5293	25.637	22.0149	29.9631	27.6896	23.6606	30.8261	23.3742	21.1268	30.9601	23.9097	21.2533	32.556	27.7507	18.1336	28.4715	27.0415	20.7089	31.4387	27.6026	23.4335	31.4788	28.7563	25.8604	35.6606	30.8878	25.6695	37.1534	28.3525	26.314	34.0046	24.4929	22.0188	31.217	26.5911	20.6792	33.1841	27.1495	21.1937	29.2602	27.6847	23.2134	32.3516
	80	27.97	21.085	33.0072	27.4739	22.6594	32.0321	30.2797	22.2574	32.6963	33.016	24.7544	34.599	26.1213	21.4798	33.3239	27.2436	21.6239	34.3079	33.1173	19.2775	32.4689	32.1755	21.1115	34.6098	31.2601	23.4346	34.7657	33.7581	25.2808	38.7779	36.671	25.7347	40.9753	33.7051	26.3435	38.1885	28.0027	22.2221	33.8806	30.3893	20.5434	35.9382	32.2618	20.8626	31.6663	32.9038	23.5578	35.4589
	80.5	36.8517	21.3885	38.2322	36.8984	22.8265	37.1833	42.1383	23.2023	40.1362	44.6314	25.7456	42.4944	34.8533	22.3941	39.2816	36.8776	22.1343	39.3003	45.2631	20.449	40.2577	43.3779	21.7779	43.3132	41.0484	22.8653	40.9824	45.0592	25.465	45.8714	50.4694	25.5942	48.8909	47.4739	27.2608	47.8318	36.634	22.6825	39.6206	40.4234	21.0912	41.6936	44.3667	21.1004	38.5526	46.1771	24.8663	43.1077
	81	55.5794	22.8037	49.3921	57.2655	23.7517	48.0705	64.2666	24.9667	54.9048	65.7271	27.717	56.8708	53.2312	23.3192	51.4181	57.2648	23.1175	50.3815	67.7263	22.072	54.9613	64.9428	24.1373	59.484	62.401	23.3111	52.9392	69.0199	26.968	60.4892	75.9425	27.6495	65.1278	70.5092	29.5294	63.2593	55.2254	24.3766	52.0342	61.8182	22.2142	54.2555	66.6715	23.0753	53.3893	69.3295	26.6239	57.8927
	81.5	82.6516	30.0363	66.4779	86.2554	31.2753	65.1163	93.6517	33.7544	75.6019	94.682	36.8698	77.3337	79.3146	29.9818	69.2313	86.0461	30.9177	68.7468	97.2896	31.589	76.1761	93.4659	33.7065	80.8786	92.6077	29.7744	70.1744	102.373	35.8884	82.2518	109.582	39.1168	87.4546	99.0523	40.0595	84.223	82.7851	31.6023	70.5333	92.4415	29.6988	72.7037	96.1235	33.3943	74.6073	98.9833	34.8552	78.1521
	82	110.717	50.0354	85.7709	116.099	51.5765	84.4714	123.891	55.3614	98.0082	124.079	59.0393	98.7854	106.906	49.4544	88.6906	115.855	51.0976	90.6172	127.021	52.8117	98.2704	121.13	55.4173	102.489	124.582	48.2753	88.2937	135.899	60.0442	105.831	143.222	65.2959	109.925	127.38	66.1491	105.511	112.345	50.8041	90.2608	124.065	50.587	92.6513	125.258	56.8255	96.8734	129.016	57.3863	99.3414
	82.5	134.125	80.5102	102.793	141.161	82.1076	101.654	148.091	86.2582	117.515	146.915	91.2509	114.917	129.87	78.8245	105.073	140.699	80.1138	109.403	149.998	79.9867	115.996	142.543	86.6534	118.787	152.106	77.9284	103.541	162.658	94.9581	125.489	168.943	100.924	128.097	148.799	103.805	120.508	136.759	80.8709	106.864	149.801	80.7443	110.097	147.579	88.3443	115.162	151.456	89.4613	115.372
	83	146.635	112.427	112.478	153.194	115.485	110.944	157.179	118.832	127.456	155.969	126.11	120.202	141.279	109.993	113.873	152.015	111.151	119.591	157.213	107.209	124.16	150.68	120.715	124.456	166.024	111.273	111.66	173.84	131.162	135.306	176.588	137.762	135.55	154.089	144.081	124.482	148.908	113.521	115.823	161.167	111.641	119.183	154.62	120.218	122.677	157.089	123.523	120.391
	83.5	137.428	141.798	108.42	141.983	146.188	106.477	142.426	148.278	121.15	142.477	157.686	110.413	131.905	139.223	108.76	139.858	140.309	115.502	141.351	131.086	116.953	136.238	151.779	115.075	154.813	142.471	105.486	158.044	163.937	127.874	157.777	169.357	125.335	136.149	180.728	113.139	139.478	143.009	109.901	147.74	140.04	113.251	138.111	147.71	114.158	139.487	155.326	110.586
	84	108.232	158.872	90.0159	110.952	163.326	88.5255	109.436	162.234	99.7228	110.239	173.36	87.7749	103.46	155.708	88.9084	109.073	155.377	95.7786	107.965	139.734	95.5552	104.1	167.352	91.7678	122.265	160.978	85.6838	121.275	180.272	103.909	120.212	181.276	100.638	102.567	198.636	89.1185	109.888	159.88	89.279	113.968	153.94	92.5953	104.111	158.569	92.0088	105.617	170.889	88.1795
	84.5	74.8651	149.486	64.9864	75.6396	154.192	64.1253	73.0396	149.255	72.2395	74.1903	160.68	60.5745	70.4275	146.292	63.3457	73.9352	144.502	68.5847	71.1138	124.399	68.4713	69.505	156.282	63.7784	84.1988	153.064	61.4145	80.9054	166.137	73.9547	79.7513	163.108	70.6656	67.5415	184.492	61.7282	74.3177	151.085	63.7958	75.8059	141.113	65.9896	67.9303	142.433	64.8084	69.1947	158.303	60.7858
	85	44.3487	118.218	40.3484	43.0462	122.941	39.8554	40.0953	116.863	45.918	42.0987	126.23	35.5129	39.9393	116.249	39.5127	41.381	114.183	42.6516	38.5454	94.5552	42.47	39.3117	124.926	39.0236	48.6927	122.423	37.9003	44.6856	129.666	45.1994	43.4066	125.618	41.9993	36.3642	145.987	36.7991	42.2362	120.055	39.5319	41.729	109.424	40.2686	36.6023	109.007	39.199	36.8924	125.035	35.6634
	85.5	18.9959	81.5831	20.047	17.4028	84.6265	20.4398	14.9414	79.2869	23.9504	17.0749	85.5024	16.2816	15.538	80.4188	19.4783	16.0953	78.6215	21.4151	15.1429	62.6276	21.4764	15.7701	86.3501	19.3726	20.4156	84.807	18.1638	16.5659	88.2813	21.6613	16.6045	84.1511	19.7443	12.7881	99.5549	16.6602	17.2902	82.375	19.1453	15.5368	73.8663	19.524	13.305	72.6579	19.0147	13.4862	85.534	16.8094
	86	5.22024	46.6379	7.36185	4.1986	48.2775	8.8056	2.5811	43.9053	10.1052	3.98112	47.5503	5.70328	2.67543	46.1665	6.58241	3.70449	44.6179	7.60264	3.84395	33.2646	8.24953	3.57334	49.0296	6.65093	5.73102	48.8803	6.91475	2.9707	49.403	8.15491	4.19885	45.3143	6.88237	1.60708	55.5822	5.30723	3.42162	47.1047	6.97126	2.52378	40.299	6.92622	2.22425	39.0167	7.13223	2.56035	47.925	6.0386
	86.5	2.03488	18.3664	2.2387	1.12366	19.2249	4.1046	0.308882	17.3818	4.83444	0.828104	18.7353	2.15714	-0.18489	19.0884	2.12002	0.864168	17.7428	2.19758	1.16334	11.7014	2.41568	1.5425	20.2235	1.93773	2.19772	19.9408	3.17067	0.737917	19.0034	3.05415	1.8788	16.7506	1.84184	0.0843519	22.3401	1.42737	0.163943	19.0807	3.00622	0.337575	14.7079	2.41228	1.12211	13.8838	2.61103	0.576537	19.3818	2.01024
	87	1.0987	3.56181	1.80247	0.940909	3.63847	2.81512	0.137825	4.63891	2.82715	0.309268	4.65789	1.69675	0.0292478	5.13916	1.49498	0.585726	4.26844	1.10176	1.58041	2.59699	0.830911	1.83137	5.39092	1.2851	1.37931	5.191	1.88778	0.644984	4.31843	0.972699	1.35488	3.701	0.699198	0.253843	5.29893	-0.0328134	0.853415	4.39557	1.85948	0.888646	2.79869	1.89232	2.20668	2.79965	1.3494	0.560673	4.64372	1.16791
	87.5	0.553628	0.205164	2.19047	1.30878	-0.378417	2.68031	-0.0508706	1.56796	1.10301	0.0211299	1.60624	1.69627	1.22521	1.29197	1.04602	0.809003	1.27532	0.758937	2.05715	1.29005	0.170228	0.792921	1.08171	0.900492	1.03504	1.68493	1.3568	0.506271	1.60392	0.748098	1.29305	0.629481	0.659154	0.166737	0.770085	-0.594666	0.885256	1.0325	1.07385	1.04372	0.740344	2.12002	1.82219	0.571982	0.979711	0.55893	0.230547	1.27934
	88	0.614828	0.64695	2.04893	1.573	-0.18317	2.27168	0.309968	1.50088	0.416309	0.259605	2.06038	1.91298	2.17083	1.10879	0.75409	0.985548	1.2504	0.873152	1.35938	1.64721	-0.107621	0.298203	1.00322	0.379174	0.894898	1.4788	0.876038	0.985835	1.19759	0.894925	1.76514	0.390239	0.342561	0.744283	1.51184	-0.0237491	0.48987	1.48074	0.962562	1.38221	1.19791	2.00683	1.39758	0.34776	1.0027	0.570652	-0.0499896	1.33421
	88.5	0.396331	0.997921	1.92308	1.25378	0.13103	1.31354	0.616483	1.29401	0.261861	0.371299	2.19029	1.69489	1.92032	1.13405	1.12846	0.627974	0.634405	1.46612	0.970964	1.77568	0.395288	1.25044	0.898147	0.802718	0.464541	1.34961	0.167734	1.10805	0.64994	-0.0864446	1.54406	0.722369	0.326098	1.25128	2.16126	0.737483	0.893317	1.77885	0.887914	1.54756	1.10477	1.71537	1.46466	0.454904	1.3456	0.617845	-0.092433	1.19948
	89	0.492164	1.13324	1.87873	1.15224	0.400972	0.832811	1.1899	0.555128	-0.18305	0.903806	1.48362	1.21384	1.84086	0.884309	1.24265	0.552506	0.491486	1.87219	1.59262	1.83189	1.00905	1.19489	0.258634	1.08296	0.641832	1.17744	-0.199402	1.02984	0.598719	0.31576	1.08598	1.0218	0.399825	0.987428	1.66137	1.16243	1.2864	1.58241	0.154157	1.53311	1.10021	1.34646	1.06126	0.748129	1.34413	0.989977	-0.0895001	0.982075
	89.5	1.063	1.34144	1.33934	1.12361	0.934965	1.27734	1.73278	0.010206	-0.0122875	1.97501	1.01366	0.777462	1.48935	0.59615	0.525824	0.865772	0.663124	2.18057	1.44815	1.68131	1.17381	0.621246	-0.184184	0.447845	1.3764	0.426153	-0.286473	1.3348	0.345424	1.60987	1.34202	1.10937	0.324985	0.623009	1.18451	1.79034	0.876331	1.24625	0.1508	1.94634	1.23932	0.477929	0.525712	0.764507	0.910606	1.04294	0.0889365	0.658796
	90	1.01443	1.39993	0.906692	0.927035	1.57757	1.08205	1.86421	-0.260851	0.646783	1.83223	1.09408	0.940246	0.337966	0.712486	0.0578776	0.775039	0.659131	2.23574	1.10046	1.23528	1.38305	1.2157	-0.140597	-0.304265	1.49912	0.335158	0.23474	1.63306	-0.0531119	1.57723	1.31927	1.37062	0.435443	0.559903	1.11228	2.10915	0.843046	1.09613	0.949273	2.06558	1.11073	0.0537108	0.741143	1.19472	0.312161	0.959312	1.18783	0.474838
	90.5	0.839683	1.16669	0.788564	0.635942	1.96106	0.640683	1.53869	-0.0443553	1.05432	0.799296	1.20711	1.07367	-0.330002	0.670178	0.237582	0.995319	0.626898	1.50686	1.37251	0.92635	1.43301	1.1529	-0.244194	-0.210561	1.64167	1.00732	1.09741	1.73253	0.412153	1.38314	0.663019	1.15668	1.05523	0.447241	0.261453	2.15962	1.13261	1.23328	1.04426	1.24456	1.11326	0.389093	0.892744	1.85991	0.12966	1.16518	2.2385	0.774484
	91	0.962389	0.860358	0.159473	0.472927	1.88254	1.01665	1.20256	0.533474	1.09337	0.500335	1.04233	0.655372	-0.420743	0.583209	0.0501483	1.41638	0.960911	0.30167	1.47956	0.729181	0.89352	0.140967	-0.417283	3.46341e-05	1.63956	1.04544	1.44543	1.06312	0.849572	1.99761	0.365595	0.757042	1.21822	0.691638	-0.760024	1.82177	0.947244	1.10704	0.681392	0.602831	1.55848	0.18546	0.952039	1.66513	-0.110348	0.889262	2.07805	0.904601
	91.5	1.07153	0.800885	-0.131173	0.756192	1.75776	1.09721	0.416363	0.796613	1.26802	0.148232	1.34705	0.941636	-0.202132	0.577014	-0.0221253	1.47484	1.20531	-0.116651	1.13337	0.229805	0.483149	0.543929	0.288305	-0.042664	1.14236	0.704657	1.96799	0.549536	1.06955	1.55137	0.451393	0.618993	1.19754	1.08413	-0.68025	1.57872	0.850969	0.644874	0.999073	0.360396	1.32262	-0.103008	1.228	1.44467	-0.168676	0.124815	1.51493	0.581095
	92	1.11774	1.09692	0.0592541	1.29805	1.36677	0.69919	0.0043864	0.939495	1.30721	-0.908773	1.42726	1.35526	0.365465	0.746248	0.894336	1.16278	1.08731	-0.0237292	0.823393	0.058658	0.450684	0.795411	0.796894	0.647854	1.23067	1.03298	2.74087	0.533896	1.18954	0.572981	0.498423	0.699471	1.64093	1.31282	0.00381734	1.09016	1.1281	0.575255	0.882849	-0.401289	1.0709	0.807015	1.13815	1.72814	0.476761	-0.0135467	1.61861	1.04681
	92.5	1.51906	1.07344	0.265559	1.39986	0.809963	1.02574	0.266422	1.17967	1.0417	-0.89417	1.17456	1.08826	0.783893	1.11203	1.65077	1.15424	0.844709	-0.235804	0.76032	0.263665	0.790779	0.33893	0.58219	1.63454	1.56708	1.13048	2.58462	0.221573	1.37991	0.599671	0.658751	0.633225	1.80287	1.74307	0.0437768	0.896139	1.47762	0.86278	0.0515779	-0.656594	1.0827	1.28637	0.903137	1.30061	1.30131	0.228294	1.27666	1.45493
	93	2.19044	0.921991	0.81585	1.659	0.370603	1.60104	0.450361	0.403389	1.1647	0.307967	1.25016	1.7016	1.07957	1.43788	1.49557	0.470586	1.10753	0.620473	0.209112	-0.132034	1.23294	0.772379	1.05304	2.30937	1.46124	0.791669	2.2611	-0.165699	1.47286	0.588298	1.13765	0.990933	1.26099	2.0952	0.825821	1.11497	1.13875	0.689416	-0.00197379	0.274581	0.653271	0.925164	0.922688	0.815402	1.29518	0.686539	0.633432	0.605909
	93.5	2.44578	0.829801	1.5949	1.64206	0.22591	1.22391	0.280553	0.176823	1.70472	1.0211	0.832819	2.25988	2.00937	1.29374	1.21193	-0.20147	1.20486	1.10745	-0.0679331	-0.692734	2.37445	0.855138	3.21566	2.78348	1.04871	0.777563	2.05201	0.798986	1.57957	1.27366	0.855183	1.0534	0.352578	2.14421	1.14392	1.74057	0.777384	0.298209	-0.0748177	0.879529	-0.193762	1.76368	0.101352	0.354255	0.993402	1.48675	1.24381	0.342432
	94	2.77322	0.541564	2.10001	1.44419	-0.0128577	1.42723	0.365022	0.308595	2.04717	1.56922	0.747244	2.08612	2.18933	1.30894	1.1876	-0.244055	0.950148	0.950859	-0.0404919	-0.671206	3.19139	0.507058	3.58925	3.49487	1.12225	0.860046	1.55234	1.1635	1.90957	1.70642	0.960697	0.962695	0.195701	2.39519	0.850112	2.24501	0.697776	0.739899	-0.377697	1.13149	-0.333038	2.3691	-0.332685	-0.0598262	1.21301	2.25193	1.64379	0.544071
	94.5	2.95239	-0.0509033	2.26593	0.183615	-0.0114165	0.787738	-0.22328	1.72401	3.13623	2.58524	-0.468682	1.13457	3.41086	0.785537	0.315142	-0.0462389	0.673593	-0.46635	0.581977	-1.41597	4.91551	-0.0699601	7.0359	4.34928	-0.134723	0.602602	0.708404	2.37193	2.70866	4.26549	-0.609576	0.367554	-1.3427	2.78794	-0.694988	3.85742	0.421616	0.238422	-1.07487	1.5422	-1.29627	3.40961	-1.93465	-1.80669	0.805825	2.98447	2.61288	0.9237
	95	1.24732	-0.225573	0.97016	-0.587472	0.0606598	-0.176126	-0.619684	1.6865	1.9869	1.40805	-0.866619	-0.141438	2.19907	-0.0766613	-0.308241	0.140218	0.0818775	-0.966169	0.605426	-1.05922	2.91539	-0.253885	5.01419	2.19726	-0.811557	0.065443	-0.0120854	1.77566	1.61064	3.09987	-1.20915	-0.218781	-1.28238	1.29254	-1.15896	2.51885	0.013982	-0.341293	-0.785427	0.674439	-1.17466	2.07283	-1.74789	-1.59564	0.10415	1.45227	1.68312	0.634993
[truncated: 48 more columns]

## Sheet: Melt Curve Plate View Results
		1	2	3	4	5	6	7	8	9	10	11	12
A	Content	Unkn	Unkn	Unkn	Unkn	Unkn	Unkn	Unkn	Unkn	Unkn	Unkn	Unkn	Unkn
A	Sample	A	G	10	A	G	10	A	G	10	A	G	10
A	Peak 1	83	84	83	83	84	83	83	84	83	83	84	83
A	Peak 2	None	None	None	None	None	None	None	None	None	None	None	None
B	Content	Unkn	Unkn	Unkn	Unkn	Unkn	Unkn	Unkn	Unkn	Unkn	Unkn	Unkn	Unkn
B	Sample	A	G	10	A	G	10	A	G	10	A	G	10
B	Peak 1	83	84	83	83	84	83	83	84	83	83	84	83
B	Peak 2	None	None	None	None	None	None	None	None	None	None	None	None
C	Content	Unkn	Unkn	Unkn	Unkn	Unkn	Unkn	Unkn	Unkn	Unkn	Unkn	Unkn	Unkn
C	Sample	A	G	10	A	G	10	A	G	10	A	G	10
C	Peak 1	83	84	83	83	84	83	83	84	83	83	84	83
C	Peak 2	None	None	None	None	None	None	None	None	None	None	None	None
D	Content	Unkn	Unkn	Unkn	Unkn	Unkn	Unkn	Unkn	Unkn	Unkn	Unkn	Unkn	Unkn
D	Sample	A	G	10	A	G	10	A	G	10	A	G	10
D	Peak 1	83	84	83	83	84	83	83	84	83	83	84	83
D	Peak 2	None	None	None	None	None	None	None	None	None	None	None	None
E	Content	Unkn	Unkn	Unkn	Unkn	Unkn	Unkn	Unkn	Unkn	Unkn	Unkn	Unkn	Unkn
E	Sample	12	16	71	12	16	71	12	16	71	12	16	71
E	Peak 1	85.5	83.5	85	86	83.5	85	85.5	83.5	85	86	83.5	85
E	Peak 2	None	None	None	None	None	None	None	None	None	None	None	None
F	Content	Unkn	Unkn	Unkn	Unkn	Unkn	Unkn	Unkn	Unkn	Unkn	Unkn	Unkn	Unkn
F	Sample	12	16	71	12	16	71	12	16	71	12	16	71
F	Peak 1	85.5	83.5	85	86	83.5	85	85.5	83.5	85	86	83.5	85
F	Peak 2	None	None	None	None	None	None	None	None	None	None	None	None
G	Content	Unkn	Unkn	Unkn	Unkn	Unkn	Unkn	Unkn	Unkn	Unkn	Unkn	Unkn	Unkn
G	Sample	12	16	71	12	16	71	12	16	71	12	16	71
G	Peak 1	85.5	83.5	85	86	83.5	85	85.5	83.5	85	86	83.5	85
G	Peak 2	None	None	None	None	None	None	None	None	None	None	None	None
H	Content	Unkn	Unkn	Unkn	Unkn	Unkn	Unkn	Unkn	Unkn	Unkn	Unkn	Unkn	Unkn
H	Sample	12	16	71	12	16	71	12	16	71	12	16	71
H	Peak 1	85.5	83.5	85	86	83.5	85	85.5	83.5	85	86	83.5	85
H	Peak 2	None	None	None	None	None	None	None	None	None	None	None	None

## Sheet: Run Information
File Name	IAA SAUR10 12 16 71.pcrd
Created By User	admin
Notes
ID
Run Started	05/28/2025 10:39:17 UTC
Run Ended	05/28/2025 11:45:43 UTC
Sample Vol	10
Lid Temp	105
Protocol File Name	Mei5Bio-2step.prcl
Plate Setup File Name	IAA SAUR10 12 16 71.pltd
Base Serial Number	CT022697
Optical Head Serial Number	785BR15045
CFX Maestro Version	5.2.008.0222.
