# Supplementary material for: Genome-wide identification of SMALL AUXIN UP RNA (SAUR) gene family and its expression profiles in response to abiotic stress and auxin in tea plants ( Camellia sinensis )
Source: PeerJ journal article supplement (doi:10.7717/peerj.20681), 2026-01-30
Supplement: IAA_SAUR73.xlsx [file IAA_SAUR73.xlsx]

## Sheet: Melt Curve Derivative Results
	Temperature	A1	A2	A3	A4	B1	B2	B3	B4	C1	C2	C3	C4	D1	D2	D3	D4	E1	E2	E3	E4	F1	F2	F3	F4	G1	G2	G3	G4	H1	H2	H3	H4
	65	-1.70591	-0.821015	-0.516575	-0.624035	-1.2933	-0.565309	-0.81857	-1.17988	-0.577949	-1.60743	-2.1071	-1.12037	-0.819781	-1.72665	-2.21647	-0.93669	-1.87624	-5.30024	-1.52496	-0.964164	-2.47364	-1.489	-1.00929	0.815595	-2.44403	-6.56209	-1.00773	-0.307406	-2.16061	-2.63811	-3.26304	0.64101
	65.5	-3.69614	-1.77887	-1.11925	-1.35208	-2.80215	-1.22484	-1.77357	-2.55641	-1.25222	-3.48277	-4.56537	-2.42748	-1.77619	-3.74107	-4.80234	-2.0295	-4.06519	-11.4839	-3.30407	-2.08902	-5.35954	-3.22618	-2.1868	1.76712	-5.2954	-14.2179	-2.18342	-0.666045	-4.68133	-5.7159	-7.06992	1.38886
	66	-3.41182	-1.64203	-1.03315	-1.24807	-2.5866	-1.13062	-1.63714	-2.35976	-1.1559	-3.21487	-4.21419	-2.24075	-1.63956	-3.4533	-4.43293	-1.87338	-3.75248	-10.6005	-3.04991	-1.92833	-4.94727	-2.97801	-2.01858	1.63119	-4.88806	-13.1242	-2.01547	-0.614811	-4.32122	-5.27622	-6.52608	1.28202
	66.5	-3.41182	-1.64203	-1.03315	-1.24807	-2.5866	-1.13062	-1.63714	-2.35976	-1.1559	-3.21487	-4.21419	-2.24075	-1.63956	-3.4533	-4.43293	-1.87338	-3.75248	-10.6005	-3.04991	-1.92833	-4.94727	-2.97801	-2.01858	1.63119	-4.88806	-13.1242	-2.01547	-0.614811	-4.32122	-5.27622	-6.52608	1.28202
	67	-3.41182	-1.64203	-1.03315	-1.24807	-2.5866	-1.13062	-1.63714	-2.35976	-1.1559	-3.21487	-4.21419	-2.24075	-1.63956	-3.4533	-4.43293	-1.87338	-3.75248	-10.6005	-3.04991	-1.92833	-4.94727	-2.97801	-2.01858	1.63119	-4.88806	-13.1242	-2.01547	-0.614811	-4.32122	-5.27622	-6.52608	1.28202
	67.5	-3.36305	-1.57827	-0.938706	-1.19395	-2.58191	-1.05379	-1.61721	-2.32562	-1.09371	-3.17125	-4.14218	-2.16707	-1.60184	-3.48465	-4.41466	-1.80575	-3.62253	-10.4987	-2.9971	-1.79601	-4.85248	-2.79398	-1.87048	1.73722	-4.88005	-13.1875	-1.89349	-0.607668	-4.27166	-5.23709	-6.39938	1.29766
	68	-3.57555	-1.94507	-1.53746	-1.48617	-2.50312	-1.54974	-1.69455	-2.60714	-1.51293	-3.44417	-4.59826	-2.65303	-1.76771	-3.21539	-4.53488	-2.28079	-4.45971	-11.1676	-3.26248	-2.6613	-5.42049	-3.96034	-2.87324	1.05177	-4.89296	-12.8673	-2.62117	-0.59829	-4.56985	-5.4534	-7.2881	1.345
	68.5	-4.69445	-2.87196	-2.58295	-2.45497	-3.24877	-2.29483	-2.17184	-2.50588	-2.02676	-3.95937	-5.38232	-3.31895	-2.67522	-3.26341	-4.80161	-2.71614	-5.79337	-12.2433	-4.18172	-3.92407	-6.81503	-6.06877	-4.03183	0.027873	-5.31777	-11.9431	-4.28727	-1.05546	-5.32081	-6.0989	-8.16094	0.215931
	69	-6.51365	-3.92705	-3.25266	-3.08149	-4.52926	-3.04232	-3.22282	-2.45257	-2.33012	-4.30495	-6.03051	-3.86445	-3.6277	-4.20545	-4.3622	-2.78284	-6.81485	-12.2332	-6.07963	-4.75593	-7.02673	-6.89019	-4.90613	-0.936793	-5.24334	-8.83629	-5.51885	-1.54853	-5.3114	-6.72887	-8.13483	-1.36579
	69.5	-6.72862	-4.19013	-3.78858	-3.34929	-4.78546	-4.06282	-4.2072	-2.93561	-2.55256	-4.15211	-6.50872	-4.22659	-3.96046	-4.77657	-3.12554	-3.25354	-7.14095	-10.7612	-7.50753	-5.97926	-6.15412	-7.58443	-5.80464	-2.60254	-4.29017	-4.14743	-6.06045	-1.33793	-4.04882	-6.70029	-7.57041	-2.04398
	70	-5.26841	-4.00255	-4.2548	-4.04873	-4.20569	-4.6474	-4.21616	-3.15049	-1.81085	-3.35209	-6.01578	-4.37847	-3.47154	-4.76317	-1.30962	-3.57139	-5.39278	-7.82868	-8.0123	-6.58602	-4.87018	-7.95314	-6.37688	-3.62642	-2.24412	0.638673	-6.34018	-1.35068	-2.00426	-5.69235	-6.0099	-2.64009
	70.5	-3.52996	-2.88386	-3.87888	-4.21353	-3.4078	-3.7319	-3.73195	-2.76453	-0.014041	-1.99942	-4.55635	-4.11049	-2.27877	-4.25338	1.17526	-2.96245	-2.41495	-3.85007	-8.19972	-6.19312	-2.05275	-6.75117	-6.24555	-4.00331	1.13181	5.12385	-5.89538	-1.97973	0.145064	-4.06095	-3.55898	-3.50267
	71	-0.402624	-0.869343	-2.55153	-3.16984	-1.75462	-2.33324	-3.15979	-2.03559	1.95411	-0.245192	-2.60907	-2.67466	-0.0870773	-2.53136	4.37825	-2.4932	1.07889	0.45461	-6.62885	-5.48677	1.75653	-4.28804	-4.99113	-4.63701	5.23588	9.51799	-4.21864	-2.32832	2.90488	-1.23394	-0.55023	-3.86977
	71.5	3.74148	1.17811	-0.709919	-1.7022	1.49797	-0.464216	-1.2432	-1.21029	4.06407	2.45992	0.651839	-0.514381	3.30828	0.825726	7.72354	-1.3798	5.27951	4.60664	-3.30727	-4.07482	5.29297	-1.06844	-2.69362	-4.92832	9.12193	12.498	-1.62798	-2.81045	6.30885	2.63622	3.13828	-3.54096
	72	7.50281	3.46711	1.29196	0.0799572	5.25272	2.19262	1.46231	0.355607	6.50685	5.67519	4.47207	1.74208	6.8301	4.30467	9.82718	0.763011	8.95879	7.9365	0.542164	-1.27987	8.75395	2.77818	0.608916	-3.71381	12.4226	13.5953	1.10636	-3.11745	9.22789	6.436	6.84661	-3.11079
	72.5	10.3663	6.06451	3.57076	2.40841	8.27823	5.36524	3.75204	2.55875	8.90646	8.40999	7.34938	4.00412	9.56658	7.21299	11.1344	2.87373	10.9716	10.2383	4.44417	1.87624	11.9419	6.2688	3.84322	-1.77753	15.1446	14.602	4.65272	-2.05316	11.4346	10.464	9.7654	-2.4574
	73	12.449	7.50608	6.13249	4.82964	10.8621	7.97217	6.1494	4.81465	10.6179	10.45	9.82194	6.53735	11.9789	9.92878	12.1393	4.96567	12.2399	11.8482	7.81841	4.43915	13.6602	9.29395	6.9313	0.345011	16.1793	15.0118	8.00041	-0.166222	13.0601	14.205	12.719	-1.00785
	73.5	13.1564	8.66628	8.25014	6.59769	13.2279	10.2076	8.23866	6.68439	11.691	12.1263	12.0121	8.26996	13.9091	11.9964	12.4788	7.26782	13.0155	13.0088	10.1877	7.03021	14.9553	11.6889	9.69939	3.06796	16.3028	14.4279	9.95534	2.04953	13.9651	16.1083	14.9501	1.04352
	74	12.6887	10.5889	9.01759	7.79663	14.2391	12.0935	9.58287	8.27076	12.8457	13.2451	12.5621	9.19934	14.3575	12.6172	12.5176	8.75262	12.8772	13.6983	11.5586	9.37739	16.1551	12.7547	11.6851	5.43833	16.6515	14.4013	11.616	4.92287	13.8417	16.6571	15.511	3.2439
	74.5	12.1021	11.6742	9.13641	8.61326	13.8537	13.0373	10.6218	9.36071	13.6875	13.4892	12.0676	9.94817	14.3751	12.7624	12.7779	9.444	12.3821	14.2182	11.9671	10.7245	16.4996	13.5407	12.4591	7.21596	17.0153	15.164	13.0057	7.53182	13.346	17.0507	15.4954	5.45357
	75	11.5913	11.9377	9.28154	9.06276	13.6194	13.6948	11.1267	9.54658	13.8538	13.4312	12.0489	10.7607	14.7122	13.3128	13.077	9.85613	12.3426	14.5556	11.9431	11.3084	16.5268	13.9843	13.1683	8.74557	16.6338	15.1216	12.9744	9.50496	12.869	16.4397	15.6122	7.60655
	75.5	10.8985	12.6316	8.6416	9.3396	13.6149	13.6341	10.8736	9.53451	13.9692	13.2878	11.6451	11.0568	14.5704	12.9995	13.0958	9.74898	12.2194	14.4761	12.1604	11.9525	16.5627	13.6005	13.467	9.72429	16.3852	15.2222	12.6248	10.8038	12.9098	15.1936	14.8025	9.42554
	76	10.5607	12.907	7.9413	9.39884	13.0361	13.0643	10.6598	9.4905	14.2207	13.1664	10.7019	10.9154	14.0416	12.3008	12.9751	9.68534	11.7216	14.1638	12.3277	12.5795	16.0199	13.5172	12.4994	10.3688	16.4225	15.7201	12.9529	11.2627	13.0163	14.707	13.9824	10.6857
	76.5	11.1508	11.98	7.93634	9.58475	12.7934	12.8371	10.229	9.11258	13.8661	12.8851	10.4787	10.9177	13.9822	12.3471	12.6511	9.86774	11.1786	13.8019	12.1623	12.3543	15.2515	13.8258	11.5579	11.6043	15.9472	15.6273	12.6942	11.7593	13.2168	14.6499	13.6714	11.2177
	77	11.5655	11.4694	7.8414	9.37292	13.5435	12.6936	9.32849	8.74477	13.2994	12.7796	10.9012	10.6912	13.8657	12.6212	12.4021	9.81726	11.1835	13.3386	12.0123	11.4642	14.8253	13.3939	11.3456	12.3139	15.3251	15.2843	12.2448	11.8225	13.6378	14.4049	12.8762	11.4996
	77.5	11.429	11.1506	7.553	8.64975	14.1488	12.0928	8.87763	8.85657	13.1737	13.0441	10.9005	9.78688	13.3903	12.46	12.3632	9.30017	10.9791	13.0189	11.4927	10.9436	14.3102	13.502	10.9003	11.9634	15.2354	15.2507	12.3121	11.1574	13.894	14.1558	12.3403	12.0297
	78	11.972	10.5424	7.67246	8.23611	14.2584	11.825	8.74974	8.65046	13.3082	13.5153	11.1098	8.80963	13.7012	12.9666	12.295	9.29571	10.5969	12.5603	10.6986	10.6815	13.973	14.1194	10.3072	12.1665	15.6428	15.518	12.0671	10.825	13.7659	14.5591	12.5795	12.31
	78.5	13.0059	10.4811	8.18523	8.22035	15.4009	12.2389	9.05992	8.24568	13.5772	13.9691	11.843	8.5488	15.0058	13.662	12.2936	9.33878	11.2387	12.1233	10.2465	9.76179	14.2718	14.0616	11.0002	12.5158	16.1468	16.011	11.4089	10.6389	13.5573	14.7173	12.8485	12.1147
	79	14.7341	12.4242	10.3196	8.39173	17.8266	14.3144	11.5659	9.50148	15.9664	16.3629	14.1603	9.73766	17.278	15.727	14.0206	10.5894	12.2324	11.9543	10.3177	9.56023	14.4785	14.1739	11.8083	11.828	16.709	16.2059	11.6799	9.9037	13.5447	14.3662	13.3837	12.3682
	79.5	22.3826	20.0008	17.398	13.4995	25.4089	23.0242	19.703	15.5382	24.7238	25.5198	22.0997	16.578	26.0328	23.9287	21.5923	17.3628	12.5893	12.0008	10.4683	10.1904	14.4165	15.1092	11.6049	11.372	17.1248	16.4696	12.0801	9.94547	13.6792	14.528	14.9167	12.3667
	80	35.9131	33.0685	28.2431	24.0692	39.6101	37.2984	32.3378	25.7432	39.0762	40.0638	35.3388	28.6786	41.6463	37.2689	33.2203	28.815	13.1384	12.2987	11.5185	10.4197	15.1961	15.4002	11.9317	11.6417	17.3446	17.0934	12.2468	10.1177	13.9909	15.1021	15.8033	11.5814
	80.5	49.7606	47.0017	39.0064	34.4006	54.8866	51.7369	45.6605	36.304	53.8973	55.1701	48.9952	40.9511	57.3639	50.5322	44.7443	39.5375	14.037	13.5476	12.9657	10.7482	16.5635	16.0556	13.5388	11.6959	17.7618	17.3772	13.6944	10.3407	14.3714	15.7743	16.2878	11.2625
	81	62.0568	59.4006	48.5979	43.7654	68.0829	65.0367	57.7051	46.7259	67.6193	69.3008	61.5805	52.1886	71.3637	62.6502	56.0374	49.242	17.5431	19.0607	17.5502	15.1564	21.8115	22.311	18.7952	14.9446	22.5763	23.325	20.1628	15.3895	19.7003	22.3855	21.716	15.374
	81.5	70.9682	68.154	54.7064	52.2336	77.8386	73.9371	65.1485	55.1015	77.4026	78.8425	70.2596	60.4621	82.6397	70.6647	63.2963	56.1117	28.8086	33.452	30.1618	27.6688	36.8431	37.5517	32.1622	27.1563	37.5216	40.0525	34.4265	28.8679	33.7947	39.1357	36.0542	27.9012
	82	67.803	65.0533	51.2531	51.406	75.5618	69.8126	61.5059	53.6919	74.1338	74.5863	66.1064	57.5533	80.3599	65.8073	58.3859	52.1871	44.7756	53.0458	47.4505	45.5107	57.5683	57.7167	51.1267	44.868	58.3836	60.7902	52.9698	46.8733	51.688	59.7789	54.6214	46.5977
	82.5	53.1163	50.9847	39.6094	40.413	59.9392	54.4925	48.2448	42.834	58.4858	58.1525	51.2796	44.9491	64.15	50.6423	44.8755	39.6869	60.4071	71.7674	63.8262	63.9688	76.871	77.9115	69.1784	62.6396	79.0251	80.2378	71.2219	65.4294	69.3374	79.906	73.9391	66.086
	83	36.9964	35.4987	27.1762	28.1938	41.8505	37.8824	33.0608	30.7557	40.735	40.0526	35.6003	31.7713	45.9659	34.7255	31.4092	27.6962	75.2585	88.6077	79.0449	80.9205	94.4924	96.2638	84.588	79.588	98.3644	99.0682	87.0677	82.826	86.3321	98.4508	92.398	84.2232
	83.5	21.9421	21.154	15.9378	17.3329	25.3503	21.9409	18.7818	19.2962	24.4154	22.983	20.6428	18.7888	28.3407	19.9972	17.927	16.48	82.6832	96.4901	86.1733	89.9557	102.894	103.986	90.9884	89.2224	107.551	105.559	93.0553	90.9128	92.9779	104.755	99.8121	94.1631
	84	9.10779	8.73162	6.56985	6.75603	11.0182	8.9099	7.33907	8.3044	10.119	8.34966	7.82479	7.04226	12.1957	7.84801	6.84521	6.09622	73.8319	86.2142	76.4963	82.125	91.1099	92.3262	80.1505	81.5148	95.903	90.3967	81.4738	81.9345	81.0136	90.5224	88.7138	86.407
	84.5	2.7394	2.09968	1.82297	0.635327	2.58898	1.89032	1.85486	1.85542	2.2201	0.665286	2.0867	1.21838	3.21542	2.23361	2.13397	1.46726	55.5965	64.524	57.3014	62.4722	68.3011	69.2691	58.9657	62.5199	71.9016	66.3607	60.4263	62.4469	60.2712	66.6361	67.404	66.3091
	85	2.08349	1.23564	1.62828	0.239234	0.886468	0.364342	1.09363	0.67364	1.20476	-0.16668	1.57636	0.0744719	1.20085	1.43607	1.6505	1.51276	37.1948	43.1284	37.8992	41.4959	46.1941	46.0767	38.2508	42.9273	47.9346	43.5024	39.9142	41.964	39.7141	43.0842	44.5728	44.769
	85.5	1.9453	1.08696	1.85269	0.990614	1.05196	0.928202	1.23029	0.869598	1.62616	0.517119	1.48453	-0.56913	0.579301	1.41952	1.60221	0.984076	19.7709	23.4643	19.6267	22.0004	24.5753	24.1984	19.6317	23.7033	24.8103	21.1373	20.8501	22.5792	19.5306	20.8653	22.9231	24.3611
	86	2.22214	0.87281	1.1633	0.933498	0.847276	1.3742	1.35206	0.306752	1.1427	0.850013	1.32557	-0.428375	0.789175	1.58655	1.84389	0.443902	6.6623	7.93877	6.34501	6.79304	8.09532	7.33398	5.6642	8.26154	7.09733	5.09022	6.53057	8.05825	4.93097	5.33377	7.76084	8.28534
	86.5	2.375	1.01739	0.459765	1.40068	0.527217	0.758269	1.4797	-0.152363	1.02672	1.20121	1.21602	0.131676	1.07952	1.38072	1.79786	0.917014	1.37407	1.29826	1.51858	-0.0186656	2.43479	0.263344	0.790237	1.99661	0.286242	0.712937	1.29621	1.94237	0.410332	0.542277	1.5163	1.25887
	87	1.5728	1.58275	0.389771	2.0813	0.675109	0.792482	1.28166	0.839169	1.24099	1.7874	1.08455	0.444752	1.11444	1.25732	1.74371	1.13655	0.963517	1.20937	1.50825	-0.116053	1.78001	-0.612074	1.34338	1.40057	0.357735	1.24143	1.2595	1.15316	0.546852	1.08839	0.685686	0.380575
	87.5	1.49688	1.83438	0.100617	1.65244	1.04192	1.3058	1.13416	1.2957	0.662125	2.00938	1.08207	0.930837	1.71639	1.73826	1.62429	0.940366	1.11856	1.28541	1.94819	1.05838	0.975304	-0.862376	1.67317	0.703395	0.861586	1.06356	0.99304	1.24737	0.733532	1.77654	1.29693	0.805184
	88	2.07766	2.06581	0.361106	0.927972	1.25272	0.738524	1.35886	0.724112	0.583598	1.22858	1.24703	1.27448	1.93453	2.19796	0.94446	1.09581	0.848323	0.842046	1.59313	1.58856	1.17555	-0.773228	1.49575	0.394034	1.24718	0.847225	0.836482	1.00487	1.40703	2.08019	1.34224	0.892036
	88.5	1.51986	1.9151	1.51026	0.535771	1.46719	0.627994	1.53193	0.961011	0.996101	0.716872	1.36656	1.39363	1.15997	1.9494	0.247491	1.32309	0.199738	1.3077	1.17023	2.15267	1.3179	0.232065	1.70857	0.362643	1.57235	1.17786	1.08448	0.572853	1.63195	1.61604	0.457021	0.643615
	89	0.910578	1.6831	2.18724	0.323925	1.69032	1.34689	1.24175	1.43527	0.940878	0.831655	1.0813	1.07632	0.849703	1.64644	-0.23326	1.40776	0.042693	1.7641	0.936327	2.75668	1.05153	1.45078	1.77507	0.20199	1.62523	1.05934	1.09851	0.758638	1.43204	1.27982	0.20533	0.699967
	89.5	1.24195	1.40011	2.23221	0.138801	1.98037	1.9942	0.993904	0.555485	1.34089	0.77473	0.597909	0.674601	1.10949	1.61512	-0.519075	1.30627	0.389711	1.48635	0.686811	2.51404	1.16315	2.20452	1.50044	0.172029	1.46978	0.404308	1.08444	0.814749	1.59391	1.14201	0.286461	0.763769
	90	1.01031	0.726686	2.30565	0.334998	1.79951	2.10405	1.18309	0.150698	2.12549	0.807481	0.299391	0.608731	0.558318	1.7325	-0.436329	0.933088	0.772199	1.62614	0.939652	1.78265	1.37521	2.47851	1.30447	0.838352	0.980862	0.237411	1.23778	0.364069	1.44299	0.672144	-0.145821	0.551905
	90.5	0.235286	0.0762183	1.96465	0.991956	1.35154	1.79852	1.09257	0.680327	2.01928	1.30084	-0.277656	0.565296	0.43019	1.48878	-0.0741295	0.907303	0.951471	1.52424	1.47574	1.54444	1.27165	2.43383	0.725753	1.12426	0.697607	0.698949	1.14091	0.375902	0.782179	0.52773	0.0599944	0.763316
	91	0.440449	0.217166	0.744866	1.50953	1.16355	1.53646	0.785547	0.754365	1.99013	1.8162	-0.461608	0.285062	1.33157	1.35776	0.573769	0.989837	1.60368	0.915864	1.1724	1.10587	1.06126	1.53385	0.00634744	0.936579	0.667813	0.706479	0.625443	0.533119	0.850076	0.857026	1.00339	0.94885
	91.5	0.970024	0.0955651	0.284552	1.21045	0.728311	1.24618	0.816123	0.812386	2.01601	1.82186	0.134521	0.57222	1.33839	1.50269	1.56155	0.690518	2.37655	1.0079	1.1218	0.42657	0.765229	0.563471	-0.494188	0.585021	0.925605	0.593613	0.352475	0.376898	0.973211	0.755443	1.50222	0.835847
	92	0.95955	-0.00579478	0.232522	0.92212	0.164981	0.535661	0.876215	1.124	1.2627	1.54709	0.768424	1.21036	0.814464	1.36423	2.24315	0.641891	2.02844	1.45689	1.5519	0.155138	0.743339	0.373444	-0.603254	0.340092	1.2929	1.08375	0.257002	0.630372	0.576448	0.585172	1.47665	1.16674
	92.5	1.10293	0.919607	0.253888	1.24763	0.181883	0.0925966	0.426029	1.3055	0.946063	1.23504	1.31838	1.19288	1.26429	0.768694	2.72485	1.39943	1.39867	1.45324	1.16977	0.258193	0.807601	0.455311	-0.352445	-0.0170323	1.57358	1.75762	0.0159206	1.19542	0.36136	0.8163	1.51573	1.51183
	93	1.26928	1.84561	0.813797	1.67826	0.268762	0.368363	0.47456	1.41548	1.11748	0.921688	2.14885	1.37168	1.34863	0.50402	3.1492	1.69278	0.927688	1.73179	1.25651	-0.067403	0.530322	0.713896	0.454019	0.143322	2.03827	1.70772	0.199571	1.36344	0.233054	0.859861	0.866942	1.61355
	93.5	1.49232	2.48296	2.30834	2.10319	0.427448	-0.175456	0.765032	1.89234	1.26928	0.431784	2.54979	0.797101	0.994934	0.518351	2.62848	1.74599	0.188211	2.13803	1.2929	-0.0121884	-0.399967	0.362067	1.26241	0.322549	1.76392	1.67649	0.603792	1.24244	-1.34246	0.763412	-0.659125	2.77631
	94	1.33211	3.05156	3.09407	3.05522	0.707086	-0.547468	0.73615	2.12517	1.46089	0.130009	2.60481	0.366923	1.36409	0.226062	2.26315	2.29668	-0.4682	2.05483	1.06638	0.413743	-0.61158	0.631573	1.65124	0.408314	1.52143	2.0976	0.856669	1.30107	-2.20172	0.924654	-1.18219	3.26119
	94.5	2.18554	4.08026	5.12503	4.27485	1.49777	-1.60773	0.908123	3.27613	2.49818	-0.030125	2.61647	-1.83283	2.00893	0.177205	0.835195	2.82993	-0.538795	2.0713	-0.35304	1.3211	-2.49744	-1.20735	2.26037	0.0432719	0.131729	2.26503	0.965935	0.963059	-5.08385	0.831569	-2.9232	5.47677
	95	1.43452	1.976	3.29348	2.24529	0.978709	-1.28011	0.524068	2.00542	1.46957	-0.0684854	1.08218	-1.94623	1.02156	0.0854791	-0.45997	1.34436	-0.140452	0.92559	-0.900205	1.05252	-2.10787	-1.68112	1.11251	-0.375459	-0.725576	1.02528	0.43614	0.208071	-3.7564	0.179109	-2.07786	3.53541

## Sheet: Melt Curve Peak Results
	Well	Fluor	Target	Content	Sample	Melt Temperature	Peak Height	Begin Temperature	End Temperature	Well Note
	A01	SYBR	SAUR73	Unkn	O/N	81.5	70.9682	76	85
	A02	SYBR	SAUR73	Unkn	3h	81.5	68.154	78.5	86
	A03	SYBR	SAUR73	Unkn	6h	81.5	54.7064	78	85
	A04	SYBR	SAUR73	Unkn	0h	81.5	52.2336	79	85
	B01	SYBR	SAUR73	Unkn	O/N	81.5	77.8386	76.5	85
	B02	SYBR	SAUR73	Unkn	3h	81.5	73.9371	78	85
	B03	SYBR	SAUR73	Unkn	6h	81.5	65.1485	78	85
	B04	SYBR	SAUR73	Unkn	0h	81.5	55.1015	78.5	85
	C01	SYBR	SAUR73	Unkn	O/N	81.5	77.4026	78	85
	C02	SYBR	SAUR73	Unkn	3h	81.5	78.8425	77	84.5
	C03	SYBR	SAUR73	Unkn	6h	81.5	70.2596	77.5	86
	C04	SYBR	SAUR73	Unkn	0h	81.5	60.4621	78.5	85
	D01	SYBR	SAUR73	Unkn	O/N	81.5	82.6397	77.5	85.5
	D02	SYBR	SAUR73	Unkn	3h	81.5	70.6647	76.5	85
	D03	SYBR	SAUR73	Unkn	6h	81.5	63.2963	78.5	85
	D04	SYBR	SAUR73	Unkn	0h	81.5	56.1117	78.5	86
	E01	SYBR	GAPDH	Unkn	O/N	83.5	82.6832	78	87
	E02	SYBR	GAPDH	Unkn	3h	83.5	96.4901	79.5	86.5
	E03	SYBR	GAPDH	Unkn	6h	83.5	86.1733	79	86.5
	E04	SYBR	GAPDH	Unkn	0h	83.5	89.9557	79	86.5
	F01	SYBR	GAPDH	Unkn	O/N	83.5	102.894	78	87.5
	F02	SYBR	GAPDH	Unkn	3h	83.5	103.986	77.5	86.5
	F03	SYBR	GAPDH	Unkn	6h	83.5	90.9884	78	86.5
	F04	SYBR	GAPDH	Unkn	0h	83.5	89.2224	79.5	89
	G01	SYBR	GAPDH	Unkn	O/N	83.5	107.551	77.5	86.5
	G02	SYBR	GAPDH	Unkn	3h	83.5	105.559	77.5	86.5
	G03	SYBR	GAPDH	Unkn	6h	83.5	93.0553	78.5	88
	G04	SYBR	GAPDH	Unkn	0h	83.5	90.9128	79.5	87
	H01	SYBR	GAPDH	Unkn	O/N	83.5	92.9779	79.5	86.5
	H02	SYBR	GAPDH	Unkn	3h	83.5	104.755	79	86.5
	H03	SYBR	GAPDH	Unkn	6h	83.5	99.8121	77.5	87
	H04	SYBR	GAPDH	Unkn	0h	83.5	94.1631	80.5	87

## Sheet: Melt Curve Plate View Results
		1	2	3	4	5	6	7	8	9	10	11	12
A	Content	Unkn	Unkn	Unkn	Unkn
A	Sample	0h	3h	6h	0/N
A	Peak 1	81.5	81.5	81.5	81.5
A	Peak 2	None	None	None	None
B	Content	Unkn	Unkn	Unkn	Unkn
B	Sample	0h	3h	6h	0/N
B	Peak 1	81.5	81.5	81.5	81.5
B	Peak 2	None	None	None	None
C	Content	Unkn	Unkn	Unkn	Unkn
C	Sample	0h	3h	6h	0/N
C	Peak 1	81.5	81.5	81.5	81.5
C	Peak 2	None	None	None	None
D	Content	Unkn	Unkn	Unkn	Unkn
D	Sample	0h	3h	6h	0/N
D	Peak 1	81.5	81.5	81.5	81.5
D	Peak 2	None	None	None	None
E	Content	Unkn	Unkn	Unkn	Unkn
E	Sample	0h	3h	6h	0/N
E	Peak 1	83.5	83.5	83.5	83.5
E	Peak 2	None	None	None	None
F	Content	Unkn	Unkn	Unkn	Unkn
F	Sample	0h	3h	6h	0/N
F	Peak 1	83.5	83.5	83.5	83.5
F	Peak 2	None	None	None	None
G	Content	Unkn	Unkn	Unkn	Unkn
G	Sample	0h	3h	6h	0/N
G	Peak 1	83.5	83.5	83.5	83.5
G	Peak 2	None	None	None	None
H	Content	Unkn	Unkn	Unkn	Unkn
H	Sample	0h	3h	6h	0/N
H	Peak 1	83.5	83.5	83.5	83.5
H	Peak 2	None	None	None	None

## Sheet: Melt Curve RFU Results
	Temperature	A1	A2	A3	A4	B1	B2	B3	B4	C1	C2	C3	C4	D1	D2	D3	D4	E1	E2	E3	E4	F1	F2	F3	F4	G1	G2	G3	G4	H1	H2	H3	H4
	65	2606.99	2579.9	2503.14	2488.54	2631.29	2589.56	2558.16	2508.62	2643.33	2618.8	2557.4	2506.95	2659.6	2588.66	2563.55	2517.97	2667.12	2721.93	2612.18	2626.54	2749.05	2695.08	2626.82	2617.07	2761.13	2718.67	2635.31	2602.54	2699.7	2764.4	2680.65	2685.99
	65.5	2608.7	2580.72	2503.66	2489.17	2632.59	2590.12	2558.98	2509.8	2643.91	2620.41	2559.51	2508.07	2660.42	2590.39	2565.77	2518.91	2669	2727.23	2613.7	2627.5	2751.52	2696.57	2627.82	2616.26	2763.58	2725.23	2636.32	2602.85	2701.86	2767.03	2683.92	2685.35
	66	2610.41	2581.54	2504.18	2489.79	2633.88	2590.69	2559.8	2510.98	2644.49	2622.02	2561.61	2509.19	2661.24	2592.11	2567.99	2519.85	2670.87	2732.53	2615.23	2628.46	2753.99	2698.06	2628.83	2615.44	2766.02	2731.79	2637.32	2603.16	2704.02	2769.67	2687.18	2684.71
	66.5	2612.11	2582.36	2504.69	2490.42	2635.17	2591.26	2560.62	2512.16	2645.07	2623.62	2563.72	2510.31	2662.06	2593.84	2570.2	2520.78	2672.75	2737.83	2616.75	2629.43	2756.47	2699.55	2629.84	2614.63	2768.47	2738.36	2638.33	2603.47	2706.19	2772.31	2690.44	2684.06
	67	2613.82	2583.19	2505.21	2491.04	2636.47	2591.82	2561.44	2513.34	2645.64	2625.23	2565.83	2511.43	2662.88	2595.57	2572.42	2521.72	2674.63	2743.13	2618.28	2630.39	2758.94	2701.04	2630.85	2613.81	2770.91	2744.92	2639.34	2603.77	2708.35	2774.95	2693.71	2683.42
	67.5	2615.52	2584.01	2505.73	2491.66	2637.76	2592.39	2562.25	2514.52	2646.22	2626.84	2567.93	2512.55	2663.7	2597.29	2574.64	2522.66	2676.5	2748.43	2619.8	2631.36	2761.41	2702.53	2631.86	2613	2773.35	2751.48	2640.35	2604.08	2710.51	2777.59	2696.97	2682.78
	68	2617.23	2584.83	2506.24	2492.29	2639.05	2592.95	2563.07	2515.7	2646.8	2628.45	2570.04	2513.67	2664.52	2599.02	2576.85	2523.59	2678.38	2753.73	2621.33	2632.32	2763.89	2704.02	2632.87	2612.18	2775.8	2758.04	2641.36	2604.39	2712.67	2780.22	2700.23	2682.14
	68.5	2619.23	2586.03	2507.33	2493.24	2640.37	2593.98	2564.01	2517.08	2647.75	2630.32	2572.58	2515.24	2665.56	2600.56	2579.18	2524.94	2681.04	2759.65	2623.17	2634.08	2766.93	2706.61	2634.77	2612	2778.29	2764.22	2643.1	2604.74	2715.13	2783.1	2704.25	2681.59
	69	2622	2587.71	2508.78	2494.71	2642.36	2595.26	2565.32	2518.21	2648.8	2632.38	2575.41	2516.98	2667.2	2602.4	2581.55	2526.27	2684.13	2765.82	2625.64	2636.2	2770.55	2709.93	2636.87	2612.16	2781.04	2769.67	2645.59	2605.45	2717.88	2786.32	2708.27	2681.99
	69.5	2625.52	2589.85	2510.55	2496.27	2644.77	2597.05	2567.22	2519.6	2650.05	2634.54	2578.57	2519.07	2669.1	2604.72	2583.42	2527.76	2687.72	2771.65	2629.19	2638.87	2773.79	2713.46	2639.67	2613.02	2783.39	2772.82	2648.51	2606.2	2720.25	2789.72	2712.29	2682.85
	70	2628.48	2591.81	2512.54	2498.09	2647.02	2599.24	2569.4	2521.11	2651.21	2636.43	2581.77	2521.16	2671.03	2607.08	2584.57	2529.49	2690.97	2776.35	2633.01	2642.09	2776.6	2717.44	2642.62	2614.68	2785.15	2773.78	2651.59	2606.81	2721.8	2792.87	2715.68	2684.01
	70.5	2630.7	2593.71	2514.68	2500.24	2648.91	2601.48	2571.35	2522.66	2651.7	2637.8	2584.43	2523.37	2672.45	2609.39	2584.62	2531.21	2692.91	2779.31	2637.11	2645.31	2778.44	2721.18	2645.93	2616.55	2785.43	2772.22	2654.73	2607.63	2722.21	2795.3	2718.15	2685.51
	71	2631.81	2594.57	2516.28	2502.13	2650.29	2602.88	2573.08	2523.82	2651.18	2638.35	2586.22	2525.1	2673.15	2611.14	2583.3	2532.45	2693.28	2780.14	2640.95	2648.21	2778.5	2723.99	2648.69	2618.7	2783.91	2768.7	2657.3	2608.77	2721.56	2796.74	2719.14	2687.44
	71.5	2630.95	2594.55	2517.15	2503.33	2650.44	2603.73	2574.32	2524.66	2649.72	2637.91	2586.85	2525.93	2672.36	2611.69	2580.23	2533.61	2691.74	2778.88	2643.48	2650.67	2776.7	2725.33	2650.75	2621.12	2780.22	2762.92	2658.81	2609.97	2719.23	2796.38	2718.61	2689.28
	72	2628.11	2593.35	2516.95	2503.78	2648.71	2603.22	2574.21	2524.92	2647.07	2635.82	2585.49	2525.59	2669.81	2610.28	2575.74	2533.68	2688.08	2775.66	2644.15	2652.09	2773.23	2724.97	2651.23	2623.42	2774.88	2756.47	2658.88	2611.53	2715.32	2794.09	2716	2690.95
	72.5	2623.58	2591.06	2515.81	2503.17	2645.28	2601.47	2572.9	2524.21	2643.23	2632.3	2582.5	2524.18	2665.63	2607.45	2570.53	2532.83	2683.02	2771.1	2642.93	2651.89	2768.01	2722.6	2650.13	2624.71	2767.91	2749.38	2657.6	2612.89	2710.11	2789.92	2711.86	2692.35
	73	2617.89	2587.43	2513.35	2501.36	2640.5	2597.93	2570.45	2522.35	2638.26	2627.51	2578.22	2521.57	2660.31	2603.12	2564.67	2530.81	2677.25	2765.54	2639.79	2650.28	2761.49	2718.78	2647.42	2625.14	2759.97	2741.96	2654.26	2613.45	2703.98	2783.7	2706.26	2693.29
	73.5	2611.35	2583.6	2509.75	2498.43	2634.48	2593.56	2566.8	2519.45	2632.7	2621.92	2572.75	2517.76	2653.75	2597.64	2558.49	2527.85	2670.87	2759.34	2635.26	2647.46	2754.43	2713.42	2643.26	2624.29	2751.88	2734.49	2649.78	2612.99	2697.17	2775.98	2699.27	2693.26
	74	2604.91	2578.69	2505.29	2494.85	2627.48	2587.79	2562.32	2515.72	2626.58	2615.48	2566.44	2513.42	2646.61	2591.33	2552.24	2523.66	2664.36	2752.6	2629.77	2643.3	2746.57	2707.28	2637.84	2622.12	2743.66	2727.47	2644.38	2611.31	2690.17	2767.8	2691.55	2692.22
	74.5	2598.7	2573.12	2500.84	2490.7	2620.44	2581.6	2557.28	2511.27	2619.91	2608.8	2560.35	2508.59	2639.47	2585.1	2545.95	2519.22	2658.05	2745.67	2623.85	2638.23	2738.39	2700.73	2631.75	2618.94	2735.23	2720	2638.24	2608.1	2683.39	2759.38	2683.86	2690.02
	75	2592.8	2567.13	2496.18	2486.3	2613.63	2574.82	2551.79	2506.49	2612.98	2602.05	2554.34	2503.47	2632.21	2578.54	2539.46	2514.27	2651.93	2738.42	2617.87	2632.69	2730.13	2693.8	2625.42	2614.96	2726.74	2712.39	2631.56	2603.88	2676.82	2750.89	2676.06	2686.78
	75.5	2587.12	2561.15	2491.66	2481.67	2606.8	2568.01	2546.26	2501.76	2606.07	2595.39	2548.35	2497.91	2624.82	2571.9	2532.91	2509.44	2645.72	2731.18	2611.89	2626.93	2721.88	2686.85	2618.66	2610.28	2718.59	2704.86	2625.32	2598.71	2670.46	2743.03	2668.36	2682.46
	76	2581.85	2554.57	2487.55	2476.99	2600.08	2561.25	2540.93	2496.97	2599.01	2588.76	2542.76	2492.48	2617.69	2565.59	2526.39	2504.52	2639.76	2723.98	2605.72	2620.76	2713.64	2680.17	2612.12	2605.28	2710.33	2697.13	2618.87	2593.2	2663.89	2735.61	2661.27	2677.44
	76.5	2576.44	2548.4	2483.64	2472.27	2593.71	2554.91	2535.64	2492.32	2591.93	2582.24	2537.55	2486.99	2610.73	2559.51	2519.96	2499.72	2634	2717.03	2599.61	2614.47	2705.89	2673.29	2606.16	2599.85	2702.23	2689.22	2612.43	2587.46	2657.42	2728.26	2654.32	2671.89
	77	2570.71	2542.55	2479.61	2467.46	2587.15	2548.41	2530.76	2487.85	2585.17	2575.85	2532.19	2481.6	2603.71	2553.21	2513.73	2494.69	2628.52	2710.19	2593.57	2608.5	2698.35	2666.43	2600.48	2593.75	2694.4	2681.54	2606.2	2581.51	2650.65	2720.97	2647.65	2666.27
	77.5	2564.93	2536.9	2475.81	2462.96	2580.17	2542.27	2526.25	2483.51	2578.57	2569.41	2526.69	2476.39	2596.89	2546.93	2507.53	2489.96	2622.83	2703.67	2587.65	2602.97	2691.07	2659.83	2594.84	2587.67	2686.83	2673.89	2600.13	2575.74	2643.81	2713.85	2641.41	2660.36
	78	2559.19	2531.42	2472	2458.77	2573.05	2536.26	2521.82	2479.02	2571.95	2562.76	2521.25	2471.82	2590.21	2540.66	2501.36	2485.33	2617.55	2697.19	2582.11	2597.52	2684.01	2652.86	2589.58	2581.73	2679.09	2666.24	2593.92	2570.32	2636.81	2706.74	2635.2	2654.27
	78.5	2552.86	2526.25	2468.05	2454.65	2565.76	2530.31	2517.39	2474.86	2565.19	2555.84	2515.47	2467.45	2583.02	2533.89	2495.19	2480.62	2612.1	2691.11	2576.9	2592.36	2677.01	2645.79	2584.36	2575.49	2671.17	2658.34	2588.1	2564.9	2630.06	2699.32	2628.81	2648.11
	79	2545.98	2520.57	2463.51	2450.43	2557.37	2523.68	2512.36	2470.48	2557.98	2548.42	2509.09	2462.97	2574.94	2526.7	2488.74	2475.73	2606.26	2685.02	2571.79	2587.67	2669.74	2638.77	2578.56	2569.34	2662.93	2650.26	2582.4	2559.73	2623.22	2692.08	2622.3	2642.11
	79.5	2537.25	2512.97	2457	2445.53	2547.13	2515.02	2504.98	2464.64	2548.28	2538.48	2500.47	2456.87	2564.77	2517.26	2480.32	2469.22	2599.94	2679.11	2566.55	2582.68	2662.55	2631.51	2572.67	2563.64	2654.48	2642.13	2576.39	2554.9	2616.48	2684.88	2615.3	2635.78
	80	2522.73	2499.75	2445.54	2436.15	2531	2499.82	2491.98	2454.32	2532.42	2522.09	2486.21	2445.62	2547.92	2502.01	2466.53	2457.68	2593.64	2672.96	2561.19	2577.5	2655.2	2623.72	2566.87	2557.87	2645.82	2633.73	2570.31	2549.75	2609.51	2677.47	2607.44	2629.83
	80.5	2501.23	2479.72	2428.72	2421.42	2507.31	2477.63	2472.51	2438.78	2509.06	2498.27	2465.01	2428.1	2523.02	2479.94	2447.05	2440.44	2586.7	2666.6	2554.89	2572.17	2647.18	2615.96	2560.49	2551.94	2637.02	2624.95	2563.88	2544.67	2602.38	2669.64	2599.46	2624.06
	81	2473.24	2453.01	2406.76	2401.9	2476.44	2448.32	2446.56	2418.07	2478.74	2467.13	2437.43	2404.86	2490.83	2451.71	2421.9	2418.35	2579.12	2658.69	2547.67	2566.08	2637.95	2606.77	2552.69	2545.6	2627.31	2615.45	2555.81	2538.63	2594.34	2660.75	2590.37	2617.84
	81.5	2439.85	2421.03	2380.77	2377.95	2439.92	2413.41	2415.61	2392.5	2442.21	2429.83	2404.18	2376.51	2452.29	2418.07	2391.75	2391.77	2568.03	2646.24	2536.18	2555.81	2623.95	2592.32	2540.49	2535.7	2612.96	2600.08	2542.56	2528.04	2581.41	2645.79	2576.44	2607.43
	82	2404.08	2386.63	2353.48	2351.05	2400.44	2376.32	2383.08	2364.43	2403.3	2390.35	2369.07	2346.05	2410.22	2382.95	2360.38	2363.82	2549.58	2624.43	2516.78	2537.58	2600.24	2568.43	2519.69	2517.59	2588.86	2574.71	2520.71	2509.03	2559.91	2620.95	2553.61	2588.99
	82.5	2373.76	2357.62	2330.75	2328.03	2366.33	2345.29	2355.57	2340.21	2369.93	2357.08	2339.68	2320.41	2373.99	2353.82	2334.68	2340.87	2523.24	2593.25	2488.79	2510.16	2566.51	2534.56	2489.44	2490.75	2554.54	2539.41	2489.61	2481.04	2529.71	2586.05	2521.67	2560.65
	83	2351.34	2336.01	2314.11	2310.96	2341.03	2322.19	2335.24	2321.91	2345.28	2332.61	2318.08	2301.35	2346.57	2332.58	2315.66	2324.21	2489.43	2553.1	2453.28	2473.95	2523.79	2490.97	2451.04	2455.2	2510.2	2494.82	2449.99	2443.92	2490.86	2541.49	2479.98	2523.22
	83.5	2336.63	2321.98	2303.41	2299.69	2324.29	2307.3	2322.39	2309.4	2329.02	2316.89	2303.98	2288.61	2327.97	2318.92	2303.24	2313.06	2449.24	2506.15	2411.11	2430.59	2473.59	2440.03	2406.37	2412.42	2457.87	2442.32	2404.16	2399.74	2445.04	2489.56	2431.04	2477.82
	84	2328.98	2314.48	2297.83	2293.49	2315.27	2299.76	2315.98	2302.47	2320.47	2309.18	2297.03	2282.3	2317.91	2312.11	2297.31	2307.51	2409.12	2459.29	2369.57	2386.5	2423.83	2389.85	2362.6	2368.52	2405.71	2392.4	2359.52	2355.54	2400.6	2439.75	2382.91	2431.69
	84.5	2326.55	2312.37	2296.13	2292.26	2312.36	2297.47	2314.15	2300.41	2317.93	2307.49	2295.11	2280.7	2314.71	2310.1	2295.46	2306.13	2376.9	2421.72	2336.13	2350.3	2384.24	2349.52	2327.84	2332.67	2363.92	2353.43	2324.2	2319.47	2365.48	2400.63	2343.99	2393.33
	85	2325.39	2311.53	2295.33	2292.02	2311.68	2297.02	2313.4	2299.83	2317.23	2307.49	2294.14	2280.36	2313.65	2309.13	2294.52	2305.35	2353.71	2394.91	2312.45	2324.39	2355.65	2320.79	2303.73	2306.29	2334.03	2326.06	2299.19	2293.4	2340.47	2373.24	2315.87	2365.78
	85.5	2324.29	2310.93	2294.38	2291.78	2311.12	2296.74	2312.85	2299.48	2316.42	2307.34	2293.38	2280.46	2313.19	2308.47	2293.67	2304.6	2339.52	2378.3	2298.01	2308.57	2337.89	2303.2	2289.24	2289.65	2315.8	2309.74	2284.02	2277.31	2325.63	2357.26	2299.19	2348.38
	86	2323.37	2310.42	2293.58	2291.1	2310.63	2296.08	2312.14	2299.02	2315.68	2306.97	2292.64	2280.81	2312.92	2307.67	2292.86	2304.35	2333.23	2370.73	2292.02	2301.67	2330.21	2295.75	2283.31	2281.93	2308.31	2303.89	2277.54	2270.03	2320.04	2351.3	2291.94	2340.68
	86.5	2322.09	2310.01	2293.22	2290.79	2310.28	2295.49	2311.5	2299.14	2315.24	2306.48	2292.05	2280.82	2312.37	2306.92	2291.86	2304.03	2331.69	2369.04	2290.41	2300.51	2328.23	2294.41	2282.23	2280.05	2307.09	2302.96	2276.15	2268	2319.23	2350.34	2290.08	2338.75
	87	2321.1	2309.35	2293.04	2289.68	2310.04	2295.25	2310.7	2299	2314.61	2305.75	2291.43	2280.69	2311.86	2306.28	2291.07	2303.46	2331.08	2368.43	2289.72	2300.65	2326.94	2294.51	2281.66	2279.04	2306.94	2302.35	2275.42	2267.24	2318.85	2349.88	2289.55	2338.45
	87.5	2320.43	2308.46	2292.84	2288.85	2309.57	2294.64	2310.21	2298.36	2314.09	2304.75	2290.95	2280.36	2311.2	2305.59	2290.13	2302.94	2330.56	2367.69	2288.76	2300.34	2326.35	2294.81	2280.82	2278.54	2306.54	2301.7	2274.81	2266.63	2318.57	2349.13	2289.11	2338.09
	88	2319.53	2307.53	2292.86	2288.08	2309.02	2294.06	2309.52	2297.83	2313.89	2303.87	2290.32	2279.78	2310.2	2304.54	2289.52	2302.48	2330	2367.18	2287.86	2299.64	2325.83	2295.28	2280.04	2278.27	2306.07	2301.29	2274.4	2266.01	2318.05	2348.15	2288.3	2337.66
	88.5	2318.48	2306.44	2292.36	2287.88	2308.32	2293.85	2308.86	2297.55	2313.44	2303.5	2289.71	2279.13	2309.39	2303.48	2289.19	2301.83	2329.76	2366.74	2287.19	2298.76	2325.17	2295.46	2279.28	2278.11	2305.3	2300.79	2273.92	2265.64	2317.22	2347.15	2287.88	2337.24
	89	2318.02	2305.63	2291.4	2287.51	2307.55	2293.32	2308.05	2296.85	2312.94	2303.07	2289.01	2278.45	2308.99	2302.61	2289.24	2301.18	2329.74	2365.87	2286.67	2297.5	2324.56	2295.02	2278.35	2277.92	2304.54	2300.16	2273.34	2265.36	2316.47	2346.53	2287.77	2336.98
	89.5	2317.46	2304.77	2290.26	2287.54	2306.63	2292.51	2307.62	2296.28	2312.44	2302.68	2288.66	2278.06	2308.47	2301.8	2289.39	2300.46	2329.64	2365.06	2286.24	2296.12	2324.07	2294.07	2277.55	2277.88	2303.72	2299.8	2272.83	2264.9	2315.75	2345.85	2287.63	2336.53
	90	2316.84	2304.28	2289.19	2287.32	2305.63	2291.41	2307	2296.24	2311.56	2302.28	2288.4	2277.74	2307.97	2300.97	2289.71	2299.9	2329.34	2364.34	2285.91	2295.05	2323.38	2292.89	2276.85	2277.66	2303.11	2299.7	2272.24	2264.61	2314.92	2345.42	2287.53	2336.24
	90.5	2316.51	2304.04	2288.03	2287.15	2304.86	2290.46	2306.46	2296.01	2310.42	2301.81	2288.38	2277.45	2307.85	2300.11	2289.78	2299.48	2328.89	2363.47	2285.27	2294.29	2322.74	2291.66	2276.3	2277.09	2302.71	2299.48	2271.63	2264.48	2314.37	2345.14	2287.69	2335.93
	91	2316.49	2304.1	2287.33	2286.35	2304.26	2289.61	2305.94	2295.6	2309.54	2300.98	2288.62	2277.19	2307.41	2299.47	2289.73	2298.98	2328.33	2362.88	2284.53	2293.53	2322.13	2290.57	2276.15	2276.61	2302.38	2299.05	2271.15	2264.21	2314.06	2344.83	2287.38	2335.48
	91.5	2316.03	2303.84	2287.19	2285.74	2303.73	2288.94	2305.64	2295.26	2308.44	2300.06	2288.74	2277.09	2306.63	2298.72	2289.16	2298.53	2327.28	2362.46	2284.07	2293.21	2321.69	2290.13	2276.26	2276.18	2302	2298.79	2270.98	2263.98	2313.51	2344.33	2286.74	2335.01
	92	2315.58	2303.99	2286.98	2285.14	2303.54	2288.41	2305.12	2294.76	2307.62	2299.2	2288.46	2276.57	2306.14	2298.01	2288.21	2298.25	2326.1	2361.82	2283.36	2293.05	2321.33	2289.91	2276.58	2276.01	2301.43	2298.38	2270.77	2263.78	2313.14	2344.08	2285.95	2334.59
	92.5	2315.05	2303.71	2286.93	2284.74	2303.49	2288.36	2304.82	2294.15	2307.12	2298.53	2287.98	2275.96	2305.7	2297.42	2286.95	2297.79	2325.3	2361.05	2282.61	2293	2320.93	2289.71	2276.8	2275.84	2300.71	2297.68	2270.73	2263.31	2312.92	2343.7	2285.28	2333.84
	93	2314.47	2303.06	2286.64	2283.87	2303.34	2288.24	2304.63	2293.46	2306.6	2297.97	2287.12	2275.38	2304.91	2297.2	2285.51	2296.9	2324.69	2360.33	2282.14	2292.83	2320.57	2289.43	2276.85	2275.96	2299.85	2296.71	2270.7	2262.63	2312.79	2343.29	2284.53	2333.1
	93.5	2313.78	2301.9	2286	2283.05	2303.21	2288.09	2304.31	2292.69	2306	2297.62	2285.88	2274.68	2304.4	2296.88	2283.93	2296.13	2324.41	2359.31	2281.36	2293.02	2320.48	2289.06	2276.34	2275.69	2298.77	2295.98	2270.5	2261.99	2312.86	2342.85	2284.52	2332.1
	94	2313.01	2300.59	2284.39	2281.7	2302.89	2288.41	2303.9	2291.58	2305.32	2297.51	2284.62	2274.6	2303.83	2296.71	2282.89	2295.1	2324.48	2358.26	2280.9	2292.79	2320.91	2289.03	2275.65	2275.66	2298.11	2294.98	2270.11	2261.38	2314.09	2342.5	2285.09	2330.37
	94.5	2312.35	2298.85	2282.82	2280.01	2302.46	2288.7	2303.56	2290.49	2304.46	2297.47	2283.32	2274.5	2303.02	2296.62	2281.79	2293.86	2324.79	2357.27	2280.43	2292.56	2321.26	2288.67	2274.7	2275.34	2297.38	2293.93	2269.67	2260.74	2315.24	2341.97	2285.8	2328.7
	95	2311.03	2296.9	2279.77	2277.84	2301.56	2289.84	2303.07	2288.61	2303.08	2297.52	2282.2	2276.16	2302.03	2296.54	2282.03	2292.53	2324.96	2356.33	2281.14	2291.62	2323.12	2290.06	2273.61	2275.62	2297.9	2292.9	2269.23	2260.47	2318.62	2341.74	2287.68	2325.43

## Sheet: Quantification Amplification
	Cycle	A1	A2	A3	A4	B1	B2	B3	B4	C1	C2	C3	C4	D1	D2	D3	D4	E1	E2	E3	E4	F1	F2	F3	F4	G1	G2	G3	G4	H1	H2	H3	H4
	1	1.13656	2.9317	2.88373	5.97157	-3.2114	-0.861576	3.8223	1.83761	-0.413679	-2.12125	3.44382	4.73248	-4.80884	5.89535	-3.68918	5.08849	4.34535	-9.01763	8.43115	9.32926	-4.3258	-5.93904	-0.712375	9.26444	-7.00032	-4.76237	-0.78112	3.79899	-0.53087	-0.557115	-4.79443	3.75311
	2	2.83053	0.952099	-0.125184	1.44201	-7.48974	1.90574	0.252745	0.0216549	0.363645	-2.29698	3.65354	2.37459	1.47693	4.31528	4.14239	-2.26237	5.55905	-2.85708	5.14129	-1.74129	2.84938	-1.58274	-3.64797	6.74394	-2.61489	1.09301	2.63925	4.78639	0.955944	-0.598273	-2.71298	-0.380773
	3	1.61835	-0.0272988	1.15365	3.93581	-5.4565	0.372369	2.28543	-1.67645	0.0485346	-3.61688	-0.239519	0.265342	-1.39038	-0.855655	-2.07177	0.421457	1.84276	1.92212	0.419336	2.57473	-0.837558	0.576492	-1.56158	2.46242	-0.661998	-1.65297	2.4834	2.86592	5.36332	1.5552	-2.01288	-0.266922
	4	-1.23798	-2.13793	0.91914	4.29866	-0.476844	0.942857	3.05439	2.7284	-0.713359	6.26819	0.574866	1.24868	-4.08565	1.56116	-0.579835	2.15877	-0.336506	-0.938402	1.92989	3.26085	3.85214	-0.630402	5.82642	3.91367	-0.917889	3.05679	-1.17034	0.0133273	-1.0275	3.76162	0.515353	-0.322659
	5	-1.75376	1.61648	2.30168	3.26724	-0.257583	3.11869	0.28763	-0.507948	1.37942	-0.0361063	0.442735	-2.74042	2.00222	-2.05786	1.63681	0.778601	-3.36932	2.28963	-1.70182	-2.11499	0.362113	-1.67942	-1.97572	-2.41998	1.23265	2.62549	-0.0378189	-2.27463	1.16987	0.65496	-1.58603	-1.02429
	6	0.480214	-1.17787	-4.00845	2.44689	3.99834	1.28226	2.98964	0.884342	0.485521	2.41884	1.98061	1.62101	0.135358	-1.21808	3.06262	-0.562524	1.0009	-2.4649	0.0456673	-3.25699	0.344114	4.1629	0.939327	0.136888	0.213008	1.79939	-1.39103	-2.57682	3.31454	-0.649685	3.05899	3.86411
	7	1.72674	0.197008	0.42697	0.126421	2.27095	-1.00041	0.61702	2.56682	-0.340972	-1.53142	-0.0452236	-3.65617	4.76436	2.14678	-1.6779	-3.86226	3.30661	3.56395	2.95105	2.95236	0.154642	0.523778	-2.06209	-1.72473	5.59944	-2.20855	2.29244	2.46048	-0.813266	-0.269856	1.81366	-0.427333
	8	2.92123	1.05769	3.86164	2.17246	2.43702	0.964359	-1.80812	-5.21885	2.42138	-0.049835	3.06994	4.5982	3.02853	3.93186	5.07515	-2.46681	1.23324	-1.40043	1.30631	-4.01442	-0.0729617	-0.052592	-0.632091	-1.70654	0.489932	-1.25973	-0.651961	3.53963	2.84329	-1.23264	1.86909	-1.74656
	9	1.209	-1.67083	-0.160221	-1.23886	0.932766	1.85054	-0.841336	4.05101	1.71213	0.642805	0.175791	6.52776	-1.40417	0.589719	5.09344	1.92576	2.44785	1.39246	-2.29961	3.04885	-1.61731	1.46288	0.270783	1.57254	-3.02747	-1.59934	-0.926948	-4.11369	-3.77087	-0.933474	1.33249	0.510859
	10	-1.71345	0.756154	-1.80194	0.768141	-0.479183	0.225174	-4.25399	-0.118675	0.0827747	-3.18991	-0.246225	-0.275764	1.27854	-0.386672	-4.09179	3.41321	-1.32261	0.977409	0.0135023	-3.61511	-3.62131	-3.07134	2.54213	0.60516	-1.41668	2.25589	1.24506	-0.208166	-3.62513	4.16642	-0.847709	0.0603137
	11	-0.00598685	0.302906	1.12037	-3.6962	2.76489	-1.83349	0.961145	-2.74981	1.56999	1.02759	-0.693801	2.95546	-0.391096	-2.07234	-3.23031	-0.806934	-0.384333	-1.59291	1.84036	1.27903	6.04016	1.88992	0.711233	-1.61222	1.77292	1.8249	0.93164	2.42246	-0.914542	2.19155	-1.81755	5.54076
	12	0.294628	1.41315	-1.42938	-0.598052	0.182118	-2.98651	2.49379	1.37753	-1.72968	-1.54219	-0.44558	-6.03128	-1.04993	-1.03595	-1.00226	0.455226	1.97371	4.27743	1.5625	3.62168	0.352757	4.19379	-0.02906	4.59913	0.923778	3.12846	3.87783	4.2509	4.04301	4.39766	-0.039228	6.96975
	13	3.65819	5.14176	1.82161	0.843633	-1.28247	-1.32328	-1.33947	-0.20119	-3.63567	-0.375068	-4.00941	-0.630065	1.96202	-0.195864	-1.78493	-1.7001	7.67263	9.49178	6.3087	9.83226	10.409	10.8651	4.64951	2.60673	10.1241	11.9425	8.64081	12.5897	5.92494	11.7067	8.72304	14.567
	14	2.74882	0.717418	-2.89635	-6.15751	-0.708423	-2.04214	-1.93746	5.1631	1.8491	-0.524689	-0.354746	-0.0815482	0.371129	3.62816	1.86382	-0.3188	18.7243	23.0295	9.91019	20.342	21.1873	21.3748	16.9677	13.0403	19.296	22.0315	19.8729	19.3228	11.161	23.0274	17.3259	23.9
	15	-5.14388	-0.209762	-1.55261	-1.75774	3.21882	2.26342	0.647905	-4.68763	4.34963	-0.832185	-1.24941	-4.2805	1.54171	-0.0167265	-1.02302	1.5105	32.8133	44.7735	28.5166	39.4663	40.1853	49.0085	26.0646	35.993	43.2252	51.9519	35.2749	43.2057	31.1638	46.3934	40.791	44.8578
	16	-2.77912	-2.21547	0.553672	-2.7633	0.583402	-1.20301	-0.69993	0.54465	-0.00214845	0.517395	-5.8013	-1.74696	-1.2868	-0.295248	1.75827	-1.8154	63.6825	90.1678	53.8177	73.4105	77.8713	91.6723	59.4514	68.1391	81.1719	90.25	64.9311	79.6871	63.1475	94.3741	68.7266	85.8232
	17	1.62331	3.28745	-1.77207	-6.12264	-1.10459	-0.0669629	0.240989	-0.28508	-0.369542	-0.658109	3.41625	-0.225387	-1.33878	0.214322	-2.94382	1.97251	108.558	138.872	96.0917	122.544	133.196	147.803	108.908	117.359	142.558	147.41	116.637	129.016	107.234	146.966	122.529	130.396
	18	-2.02166	-0.164502	-1.29579	0.618893	-1.64908	-0.889774	-6.24912	-2.28502	-2.86757	1.994	0.851584	1.16472	-3.93035	1.44891	-2.34545	-0.946876	144.561	180.018	137.752	158.313	180.245	190.319	155.116	157.001	195.651	193.055	162.444	166.518	146.346	192.422	175.039	171.064
	19	-4.61488	-3.81307	-2.62145	-6.40903	-4.73097	-2.47579	-2.33627	1.0416	-1.22224	1.62166	3.48122	0.266315	2.9616	-1.56515	-0.668489	-2.29965	171.371	209.924	172.377	185.187	218.377	222.998	189.156	185.921	235.965	229.078	198.869	195.95	180.4	225.362	216.546	201.097
	20	3.73375	3.79524	3.75867	-5.74311	-1.13144	0.988176	-3.53892	2.22404	2.43441	0.156822	1.58587	0.853873	1.09376	0.812872	1.79705	0.975902	191.439	230.415	194.763	204.166	243.214	246.453	212.591	206.38	264.986	254.194	222.682	214.108	202.626	246.036	246.787	224.457
	21	4.40209	3.43337	3.97161	-2.36923	4.80737	6.88559	7.05481	1.01243	1.90914	4.28171	3.67637	3.45397	-0.642378	0.7578	3.94604	1.65927	212.766	250.914	212.019	224.693	267.205	270.531	231.131	226.072	291.049	279.792	244.773	234.952	223.3	267.566	269.541	244.902
	22	8.71284	13.9469	8.57655	-1.09987	8.73461	9.54701	7.69297	5.31113	6.39445	9.85292	8.22583	2.18632	9.49632	5.37047	7.71386	3.68549	233.005	269.529	229.193	241.664	290.604	292.298	252.738	243.945	315.6	300.871	263.729	253.797	240.507	287.825	294.571	264.984
	23	19.9152	22.7519	17.7985	7.99569	23.3403	18.6391	17.3528	7.62536	21.4935	27.9051	20.5732	9.25876	18.8599	18.691	22.5808	11.17	250.399	284.312	244.784	256.194	313.359	308.187	269.046	256.312	338.358	319.338	279.253	268.821	255.311	305.97	313.993	278.306
	24	32.4583	40.6432	31.3193	17.4725	44.0083	37.9235	40.3866	17.5789	42.8245	48.8489	39.9962	16.8811	44.0703	41.8723	39.2494	23.7162	264.396	297.994	258.078	269.176	332.501	322.323	282.763	265.584	357.091	332.517	292.02	282.239	268.077	320.394	329.523	292.549
	25	67.043	71.4318	52.1526	28.9215	80.7911	70.096	61.6071	32.9647	74.4665	84.8954	68.9667	36.1825	81.1687	71.6566	68.9546	34.6066	275.004	308.302	268.702	278.963	346.932	332.939	291.513	275.908	373.361	345.547	303.734	290.714	277.998	331.043	340.358	302.89
	26	98.0939	97.0477	74.3497	59.8863	112.866	102.597	87.911	65.6178	111.865	114.564	100.252	63.0335	118.469	96.6456	94.4866	61.961	282.084	319.188	275.46	286.492	357.202	344.041	300.268	283.685	384.476	355.601	316.076	299.954	286.003	340.483	349.33	312.241
	27	123.284	117.881	91.9567	73.3599	142.122	126.108	108.674	82.7211	140.548	141.115	124.308	83.7942	148.825	117.939	114.754	83.5467	289.339	326.344	280.898	292.404	365.179	351.97	305.091	290.906	395.126	366.147	322.775	306.053	292.312	346.758	356.935	318.785
	28	142.376	137.64	106.416	84.9534	164.552	142.367	123.919	97.4355	163.094	159.582	139.343	100.259	171.541	136.028	131.997	99.8457	295.313	333.206	284.049	295.632	371.658	359.109	309.874	292.568	403.554	372.08	329.541	311.357	298.24	351.774	363.912	326.207
	29	163.038	156.006	121.157	95.9951	188.692	162.866	142.145	112.321	186.544	182.675	158.683	115.168	194.204	158.145	149.774	115.492	301.481	335.575	288.909	299.019	378.855	363.904	313.031	296.05	411.666	379.026	332.655	313.221	303.747	356.067	370.565	332.082
	30	182.863	174.976	136.489	110.627	210.65	186.793	160.594	126.576	210.672	205.374	178.189	131.892	218.204	178.005	168.477	129.954	306.049	337.895	290.775	302.98	383.611	369.987	317.495	298.611	416.81	382.014	336.435	315.742	307.233	359.497	377.187	334.923
	31	201.504	190.317	149.09	124.184	233.357	205.841	176.544	140.962	232.061	226.778	197.38	148.498	242.472	196.94	184.663	145.215	308.553	339.466	294.508	306.024	388.529	374.391	321.015	301.281	422.34	384.8	338.808	319.1	309.106	362.493	379.808	335.555
	32	217.072	207.661	160.967	137.378	250.224	222.622	190.057	153.87	249.916	244.378	210.521	162.565	262.527	209.658	200.244	158.38	309.881	342.961	294.467	309.731	390.943	378.129	323.291	301.26	427.519	387.007	341.379	321.884	311.141	365.634	384.247	339.211
	33	231.961	221.805	170.276	147.56	265.439	234.411	200.155	166.038	265.299	258.857	222.255	173.647	279.377	223.131	212.595	170.856	311.437	347.079	296.727	310.75	394.476	379.841	324.225	300.708	431.134	390.985	344.094	324.335	311.879	368.296	385.161	342.7
	34	245.785	234.383	179.611	156.734	278.108	248.939	210.346	177.561	277.053	271.999	231.227	185.654	292.366	234.404	222.324	180.987	312.796	348.067	299.066	313.431	397.907	382.716	326.321	300.915	434.902	394.03	345.371	327.18	313.396	369.832	388.522	347.268
	35	257.079	241.803	185.646	162.984	288.864	258.706	219.181	185.486	286.461	283.94	241.681	196.916	304.57	245.619	230.563	189.619	317.302	350.926	300.752	313.644	399.529	384.63	329.141	303.331	436.394	396.154	347.248	328.934	313.042	371.105	389.463	349.11
	36	264.103	250.235	189.326	169.251	297.364	266.993	225.694	192.152	295.804	293.649	249.202	206.968	312.745	254.055	238.723	197.252	317.881	351.305	301.776	313.41	402.062	387.811	331.412	304.257	437.523	396.376	348.574	328.584	314.174	371.172	392.399	351.197
	37	269.563	256.768	192.3	174.901	307.134	272.977	229.795	196.526	303.722	301.921	258.491	213.118	323.419	261.027	246.379	202.798	319.801	354.064	300.587	314.337	402.771	387.866	332.176	307.094	438.056	399.613	351.464	329.369	314.709	372.993	395.874	350.706
	38	276.903	264.201	198.773	179.428	314.863	279.26	233.519	203.083	312.021	308.649	264.101	217.563	331.651	267.814	253.03	208.778	318.481	352.527	301.291	315.523	404.774	388.667	331.607	306.643	439.86	401.242	351.777	331.899	315.846	372	397.148	351.543
	39	283.152	268.81	204.593	182.965	320.855	286.191	238.12	209.258	317.011	316.395	269.821	221.632	340.073	274.353	259.034	214.254	318.319	351.827	301.07	315.714	406.185	388.942	332.633	307.328	441.046	404.195	353.593	334.363	315.203	373.268	398.821	353.126
	40	286.573	273.073	207.396	186.348	323.941	293.426	242.88	215.798	322.049	324.272	274.58	226.691	344.579	280.457	263.52	219.507	319.047	350.93	301.556	313.788	409.046	391.4	335.4	306.479	440.01	405.574	355.932	334.535	313.867	373.73	400.359	356.262

## Sheet: Quantification Cq Results
	Well	Fluor	Target	Content	Sample	Biological Set Name	Cq	Cq Mean	Cq Std. Dev	Starting Quantity (SQ)	Log Starting Quantity	SQ Mean	SQ Std. Dev	Set Point	Well Note
	A01	SYBR	SAUR73	Unkn	O/N		23.2064	23.2064	0				0	60
	A02	SYBR	SAUR73	Unkn	3h		22.9718	22.9718	0				0	60
	A03	SYBR	SAUR73	Unkn	6h		23.348	23.348	0				0	60
	A04	SYBR	SAUR73	Unkn	0h		24.4394	24.4394	0				0	60
	B01	SYBR	SAUR73	Unkn	O/N		22.9427	22.9427	0				0	60
	B02	SYBR	SAUR73	Unkn	3h		23.2004	23.2004	0				0	60
	B03	SYBR	SAUR73	Unkn	6h		23.2236	23.2236	0				0	60
	B04	SYBR	SAUR73	Unkn	0h		24.3201	24.3201	0				0	60
	C01	SYBR	SAUR73	Unkn	O/N		23.0474	23.0474	0				0	60
	C02	SYBR	SAUR73	Unkn	3h		22.7008	22.7008	0				0	60
	C03	SYBR	SAUR73	Unkn	6h		23.0994	23.0994	0				0	60
	C04	SYBR	SAUR73	Unkn	0h		24.2913	24.2913	0				0	60
	D01	SYBR	SAUR73	Unkn	O/N		23.1445	23.1445	0				0	60
	D02	SYBR	SAUR73	Unkn	3h		23.1645	23.1645	0				0	60
	D03	SYBR	SAUR73	Unkn	6h		22.9948	22.9948	0				0	60
	D04	SYBR	SAUR73	Unkn	0h		23.9034	23.9034	0				0	60
	E01	SYBR	GAPDH	Unkn	O/N		14.2682	14.2682	0				0	60
	E02	SYBR	GAPDH	Unkn	3h		13.9612	13.9612	0				0	60
	E03	SYBR	GAPDH	Unkn	6h		14.6768	14.6768	0				0	60
	E04	SYBR	GAPDH	Unkn	0h		14.113	14.113	0				0	60
	F01	SYBR	GAPDH	Unkn	O/N		14.0693	14.0693	0				0	60
	F02	SYBR	GAPDH	Unkn	3h		14.0408	14.0408	0				0	60
	F03	SYBR	GAPDH	Unkn	6h		14.6086	14.6086	0				0	60
	F04	SYBR	GAPDH	Unkn	0h		14.4123	14.4123	0				0	60
	G01	SYBR	GAPDH	Unkn	O/N		14.134	14.134	0				0	60
	G02	SYBR	GAPDH	Unkn	3h		14.0158	14.0158	0				0	60
	G03	SYBR	GAPDH	Unkn	6h		14.1708	14.1708	0				0	60
	G04	SYBR	GAPDH	Unkn	0h		14.1332	14.1332	0				0	60
	H01	SYBR	GAPDH	Unkn	O/N		14.5671	14.5671	0				0	60
	H02	SYBR	GAPDH	Unkn	3h		13.9537	13.9537	0				0	60
	H03	SYBR	GAPDH	Unkn	6h		14.2207	14.2207	0				0	60
	H04	SYBR	GAPDH	Unkn	0h		13.8504	13.8504	0				0	60

## Sheet: Run Information
File Name	IAA SAUR73.pcrd
Created By User	admin
Notes
ID
Run Started	07/29/2025 06:05:44 UTC
Run Ended	07/29/2025 07:11:59 UTC
Sample Vol	10
Lid Temp	105
Protocol File Name	Mei5Bio-2step.prcl
Plate Setup File Name	IAA SAUR73.pltd
Base Serial Number	CT022697
Optical Head Serial Number	785BR15045
CFX Maestro Version	5.2.008.0222.
