# Supplementary material for: Genome-wide identification of SMALL AUXIN UP RNA (SAUR) gene family and its expression profiles in response to abiotic stress and auxin in tea plants ( Camellia sinensis )
Source: PeerJ journal article supplement (doi:10.7717/peerj.20681), 2026-01-30
Supplement: MeJA_SAUR16_and_PEG_NaCl_SAUR10.xlsx [file MeJA_SAUR16_and_PEG_NaCl_SAUR10.xlsx]

## Sheet: Quantification Cq Results
	Well	Fluor	Target	Content	Sample	Biological Set Name	Cq	Cq Mean	Cq Std. Dev	Starting Quantity (SQ)	Log Starting Quantity	SQ Mean	SQ Std. Dev	Set Point	Well Note
	A01	SYBR	16	Unkn	MeJA-0h		25.3561	25.3561	0				0	60
	A02	SYBR	16	Unkn	MeJA-6h		25.0377	25.0377	0				0	60
	A03	SYBR	16	Unkn	MeJA-12h		24.3704	24.3704	0				0	60
	A04	SYBR	16	Unkn	MeJA-24h		23.933	23.933	0				0	60
	A05	SYBR	10	Unkn	PEG-0h		29.739	29.739	0				0	60
	A06	SYBR	10	Unkn	PEG-24h		25.3055	25.3055	0				0	60
	A07	SYBR	10	Unkn	PEG-48h		25.9098	25.9098	0				0	60
	A08	SYBR	10	Unkn	PEG-72h		25.6377	25.6377	0				0	60
	A09	SYBR	10	Unkn	NaCl-0h		29.3409	29.3409	0				0	60
	A10	SYBR	10	Unkn	NaCl-24h		28.3876	28.3876	0				0	60
	A11	SYBR	10	Unkn	NaCl-48h		28.5039	28.5039	0				0	60
	A12	SYBR	10	Unkn	NaCl-72h		25.66	25.66	0				0	60
	B01	SYBR	16	Unkn	MeJA-0h		25.4273	25.4273	0				0	60
	B02	SYBR	16	Unkn	MeJA-6h		24.5242	24.5242	0				0	60
	B03	SYBR	16	Unkn	MeJA-12h		24.3776	24.3776	0				0	60
	B04	SYBR	16	Unkn	MeJA-24h		24.1575	24.1575	0				0	60
	B05	SYBR	10	Unkn	PEG-0h		30.0235	30.0235	0				0	60
	B06	SYBR	10	Unkn	PEG-24h		25.8378	25.8378	0				0	60
	B07	SYBR	10	Unkn	PEG-48h		25.6174	25.6174	0				0	60
	B08	SYBR	10	Unkn	PEG-72h		25.7926	25.7926	0				0	60
	B09	SYBR	10	Unkn	NaCl-0h		29.7462	29.7462	0				0	60
	B10	SYBR	10	Unkn	NaCl-24h		28.6684	28.6684	0				0	60
	B11	SYBR	10	Unkn	NaCl-48h		28.6456	28.6456	0				0	60
	B12	SYBR	10	Unkn	NaCl-72h		25.5724	25.5724	0				0	60
	C01	SYBR	16	Unkn	MeJA-0h		25.6332	25.6332	0				0	60
	C02	SYBR	16	Unkn	MeJA-6h		24.3381	24.3381	0				0	60
	C03	SYBR	16	Unkn	MeJA-12h		24.1113	24.1113	0				0	60
	C04	SYBR	16	Unkn	MeJA-24h		23.886	23.886	0				0	60
	C05	SYBR	10	Unkn	PEG-0h		29.9638	29.9638	0				0	60
	C06	SYBR	10	Unkn	PEG-24h		25.435	25.435	0				0	60
	C07	SYBR	10	Unkn	PEG-48h		25.6307	25.6307	0				0	60
	C08	SYBR	10	Unkn	PEG-72h		25.5504	25.5504	0				0	60
	C09	SYBR	10	Unkn	NaCl-0h		29.527	29.527	0				0	60
	C10	SYBR	10	Unkn	NaCl-24h		28.4413	28.4413	0				0	60
	C11	SYBR	10	Unkn	NaCl-48h		28.7441	28.7441	0				0	60
	C12	SYBR	10	Unkn	NaCl-72h		25.632	25.632	0				0	60
	D01	SYBR	16	Unkn	MeJA-0h		25.2955	25.2955	0				0	60
	D02	SYBR	16	Unkn	MeJA-6h		24.6654	24.6654	0				0	60
	D03	SYBR	16	Unkn	MeJA-12h		24.5435	24.5435	0				0	60
	D04	SYBR	16	Unkn	MeJA-24h		23.6565	23.6565	0				0	60
	D05	SYBR	10	Unkn	PEG-0h		29.9836	29.9836	0				0	60
	D06	SYBR	10	Unkn	PEG-24h		25.537	25.537	0				0	60
	D07	SYBR	10	Unkn	PEG-48h		25.5095	25.5095	0				0	60
	D08	SYBR	10	Unkn	PEG-72h		25.4508	25.4508	0				0	60
	D09	SYBR	10	Unkn	NaCl-0h		29.3756	29.3756	0				0	60
	D10	SYBR	10	Unkn	NaCl-24h		28.2858	28.2858	0				0	60
	D11	SYBR	10	Unkn	NaCl-48h		28.5565	28.5565	0				0	60
	D12	SYBR	10	Unkn	NaCl-72h		25.9889	25.9889	0				0	60
	E01	SYBR	G	Unkn	MeJA-0h		17.1947	17.1947	0				0	60
	E02	SYBR	G	Unkn	MeJA-6h		17.1338	17.1338	0				0	60
	E03	SYBR	G	Unkn	MeJA-12h		17.2065	17.2065	0				0	60
	E04	SYBR	G	Unkn	MeJA-24h		17.2495	17.2495	0				0	60
	E05	SYBR	G	Unkn	PEG-0h		17.3126	17.3126	0				0	60
	E06	SYBR	G	Unkn	PEG-24h		17.2274	17.2274	0				0	60
	E07	SYBR	G	Unkn	PEG-48h		17.1268	17.1268	0				0	60
	E08	SYBR	G	Unkn	PEG-72h		17.2624	17.2624	0				0	60
	E09	SYBR	G	Unkn	NaCl-0h		17.4646	17.4646	0				0	60
	E10	SYBR	G	Unkn	NaCl-24h		17.2875	17.2875	0				0	60
	E11	SYBR	G	Unkn	NaCl-48h		17.3529	17.3529	0				0	60
	E12	SYBR	G	Unkn	NaCl-72h		17.1046	17.1046	0				0	60
	F01	SYBR	G	Unkn	MeJA-0h		17.3825	17.3825	0				0	60
	F02	SYBR	G	Unkn	MeJA-6h		17.4466	17.4466	0				0	60
	F03	SYBR	G	Unkn	MeJA-12h		17.2999	17.2999	0				0	60
	F04	SYBR	G	Unkn	MeJA-24h		17.3371	17.3371	0				0	60
	F05	SYBR	G	Unkn	PEG-0h		17.757	17.757	0				0	60
	F06	SYBR	G	Unkn	PEG-24h		17.3684	17.3684	0				0	60
	F07	SYBR	G	Unkn	PEG-48h		17.2647	17.2647	0				0	60
	F08	SYBR	G	Unkn	PEG-72h		17.4089	17.4089	0				0	60
	F09	SYBR	G	Unkn	NaCl-0h		17.3458	17.3458	0				0	60
	F10	SYBR	G	Unkn	NaCl-24h		17.4455	17.4455	0				0	60
	F11	SYBR	G	Unkn	NaCl-48h		17.3909	17.3909	0				0	60
	F12	SYBR	G	Unkn	NaCl-72h		17.4959	17.4959	0				0	60
	G01	SYBR	G	Unkn	MeJA-0h		17.2836	17.2836	0				0	60
	G02	SYBR	G	Unkn	MeJA-6h		17.1647	17.1647	0				0	60
	G03	SYBR	G	Unkn	MeJA-12h		17.1856	17.1856	0				0	60
	G04	SYBR	G	Unkn	MeJA-24h		17.1894	17.1894	0				0	60
	G05	SYBR	G	Unkn	PEG-0h		17.405	17.405	0				0	60
	G06	SYBR	G	Unkn	PEG-24h		17.3659	17.3659	0				0	60
	G07	SYBR	G	Unkn	PEG-48h		17.1713	17.1713	0				0	60
	G08	SYBR	G	Unkn	PEG-72h		17.1832	17.1832	0				0	60
	G09	SYBR	G	Unkn	NaCl-0h		17.1052	17.1052	0				0	60
	G10	SYBR	G	Unkn	NaCl-24h		17.2436	17.2436	0				0	60
	G11	SYBR	G	Unkn	NaCl-48h		17.1677	17.1677	0				0	60
	G12	SYBR	G	Unkn	NaCl-72h		17.3795	17.3795	0				0	60
	H01	SYBR	G	Unkn	MeJA-0h		17.5254	17.5254	0				0	60
	H02	SYBR	G	Unkn	MeJA-6h		17.4614	17.4614	0				0	60
	H03	SYBR	G	Unkn	MeJA-12h		17.0773	17.0773	0				0	60
	H04	SYBR	G	Unkn	MeJA-24h		17.4307	17.4307	0				0	60
	H05	SYBR	G	Unkn	PEG-0h		17.2192	17.2192	0				0	60
	H06	SYBR	G	Unkn	PEG-24h		17.2036	17.2036	0				0	60
	H07	SYBR	G	Unkn	PEG-48h		17.2246	17.2246	0				0	60
	H08	SYBR	G	Unkn	PEG-72h		17.3683	17.3683	0				0	60
	H09	SYBR	G	Unkn	NaCl-0h		17.411	17.411	0				0	60
	H10	SYBR	G	Unkn	NaCl-24h		17.2948	17.2948	0				0	60
	H11	SYBR	G	Unkn	NaCl-48h		16.9821	16.9821	0				0	60
	H12	SYBR	G	Unkn	NaCl-72h		17.1381	17.1381	0				0	60

## Sheet: Quantification Amplification
	Cycle	A1	A2	A3	A4	A5	A6	A7	A8	A9	A10	A11	A12	B1	B2	B3	B4	B5	B6	B7	B8	B9	B10	B11	B12	C1	C2	C3	C4	C5	C6	C7	C8	C9	C10	C11	C12	D1	D2	D3	D4	D5	D6	D7	D8	D9	D10	D11	D12
	1	31.3169	27.7909	84.1963	90.0962	51.5715	39.381	47.4909	130.988	59.7989	90.4234	43.7332	69.1727	10.0916	-8.12637	-10.0864	-7.21401	6.70163	23.86	15.6847	27.3602	39.3719	53.1693	17.2601	14.5249	-13.7775	18.2874	16.091	18.2224	11.428	-0.440738	25.1222	14.5533	54.1814	36.9284	55.652	46.9952	-21.318	-14.5133	12.6229	21.703	16.3767	-19.6596	-5.19657	-9.3019	-22.8629	34.4978	46.7167	42.4235
	2	-1.51422	0.389527	4.21148	1.17259	0.158033	4.13905	-2.37249	3.99003	-2.2755	0.093532	0.926018	-4.45914	5.98576	0.834521	9.91616	0.114942	-0.365623	1.39115	0.325858	1.24738	-1.85608	-5.64412	0.384552	-0.0271427	-8.58861	0.747188	-1.45502	-1.49486	-2.78615	0.953725	3.66333	-3.45038	-4.7807	-1.57162	-2.59257	0.889728	2.96738	1.83867	-0.427597	0.649031	-3.04491	-0.0119281	-3.31944	-3.7337	2.9227	3.74006	-0.585143	3.73151
	3	-1.48139	-0.894537	2.32941	0.438434	-0.429403	8.90192	0.828516	1.68817	-2.88333	2.45137	-2.78346	2.76033	1.35252	3.1016	0.881633	4.01127	2.07438	-1.16706	0.129188	1.86994	0.70693	-3.85836	-0.343001	2.5819	-0.638665	2.31531	-1.51099	-3.9334	-4.1386	0.755404	4.2702	-1.58445	0.196643	-6.32855	-1.81652	-6.31626	1.26719	-1.94518	-2.70955	-2.20411	-0.781436	0.0935248	0.251978	0.0577421	1.48632	0.78301	-2.54359	1.57141
	4	0.274037	0.148893	0.407678	3.88674	1.19475	5.169	2.84449	-1.67745	-0.177632	-3.98944	1.63421	4.01071	1.96708	2.48874	-1.9327	1.97754	-1.77046	7.48055	-0.0668612	-0.835194	2.19227	-0.507872	2.86278	-1.76566	3.36576	-3.03438	-1.17154	0.441434	-0.0333927	0.611624	-0.210661	-1.40085	-3.9797	0.68594	-3.19643	-1.34306	-0.906267	0.255197	-1.61063	1.6107	-3.94976	2.56528	0.117002	-1.69925	-0.133432	-1.54167	-3.66006	5.09422
	5	2.04368	-1.54199	-1.4464	-1.04128	-0.970025	-2.52146	1.3907	4.70082	-0.903388	-2.69603	-2.46915	0.420711	-0.297376	-0.635414	-0.563895	-1.43626	-3.16953	0.188984	0.343279	-0.342749	2.12674	-0.773071	2.37407	-4.61272	1.47983	2.08477	2.81031	3.59286	2.65198	-1.29482	-1.57594	0.649983	2.30084	-0.689802	2.6828	4.86563	2.70656	1.19386	0.777961	-0.611247	-0.199345	2.52671	-1.46465	0.370157	0.231909	0.355588	3.28564	3.35573
	6	0.853348	0.896382	-1.909	3.129	-1.60791	3.12237	0.539977	-0.0593796	-1.11733	3.38205	0.422899	2.38036	0.22489	-0.0263281	0.52734	1.88158	1.51958	-0.777724	2.55359	-2.20562	3.02004	2.13057	-1.19395	2.78436	-1.84002	4.19198	-0.966272	1.43182	0.827182	1.15077	3.46394	-0.232314	-3.09805	3.16909	-0.683419	4.76114	0.965432	0.527543	-1.85726	2.12497	3.82619	-0.52502	0.884582	0.19112	0.5837	1.5807	-1.72408	-2.7619
	7	-1.17766	0.586167	-0.251708	3.01488	-0.799845	3.49386	-0.532601	-2.49104	3.51032	0.0332198	1.11929	3.11746	1.41861	-5.47804	-1.89157	-2.34739	-0.26081	-0.271389	-1.81051	0.614015	1.02201	-1.00071	-4.47091	-3.24575	1.13968	-1.16906	-2.62515	4.82049	-0.564068	-2.57056	-1.0822	1.18806	3.80039	3.0691	1.1453	2.42295	-3.10142	1.91305	-0.770899	0.614141	2.6845	-1.36582	1.76189	-0.841517	0.449862	3.25452	-2.89166	1.16927
	8	-1.00049	1.31458	-0.805024	-3.00613	-0.22835	-4.7496	1.45849	-6.06748	0.838031	1.06352	0.789492	-4.64127	2.59904	-0.2649	-0.537224	0.155276	3.03555	0.392447	-3.04506	0.276517	-2.38531	-0.845547	5.77019	4.25658	-0.430803	0.0168259	1.39642	-2.52254	-0.49577	0.835764	-1.10548	-0.851276	4.14873	2.20669	3.25059	8.38146	0.668977	3.90383	3.12976	-2.77838	-2.70554	-0.142429	-2.16111	-0.0478644	-0.0125453	6.37371	2.84319	-1.14807
	9	0.702657	1.49122	1.02119	-2.66145	-0.314527	-12.4407	0.266144	2.23126	1.89953	2.86801	2.61741	-3.26042	-2.73056	0.0423442	4.69706	2.80355	0.0576151	-1.09986	-0.400898	-0.415838	-0.755335	5.59502	1.8486	2.01354	0.154239	-1.66301	1.26193	0.299596	6.3706	3.40044	6.08998	3.4619	2.98463	-2.48382	5.81505	-0.151394	1.44067	1.33057	2.87412	0.734278	-1.55933	1.48742	1.99039	2.60069	0.0764463	-1.98688	3.37079	-1.63663
	10	-2.97255	-2.37062	1.09894	-1.31694	0.427105	-1.19325	0.113665	1.81116	1.50343	-1.53379	-4.03757	-0.0249542	0.22608	1.66566	0.239874	-2.67628	5.23414	-1.60623	2.78364	5.10005	0.810344	0.0696905	-2.08749	0.480714	1.00392	-0.673737	1.83862	1.11048	-3.77923	3.22988	2.71382	2.89596	0.703824	0.217123	-0.325189	-0.570026	-2.9681	-1.70277	0.908832	3.64192	1.62547	2.31632	5.79966	0.541194	-3.45116	1.60649	2.60942	4.23997
	11	3.62179	4.59146	4.25331	-0.565736	3.99694	0.728443	-5.94424	3.46868	-1.06521	3.02045	1.37926	-2.36599	2.22168	0.394888	1.71201	1.26037	-2.0701	1.56987	-2.85659	-1.76016	0.87499	5.59083	3.05103	4.66833	1.81296	-1.20916	0.454559	0.829292	0.0238353	-0.0314427	1.61195	3.80177	2.38001	-2.18456	0.227403	-2.3577	2.65598	-0.238146	3.08598	1.20854	-1.37235	-2.20851	3.57247	3.42546	2.24105	-1.10038	0.730104	-1.82569
	12	0.235911	1.84785	2.95039	0.857531	4.35761	5.29529	2.99016	0.549598	0.0895586	1.44594	-0.462675	-0.301355	-0.569898	0.597513	4.1317	2.40878	-0.510118	1.53705	5.8635	2.32089	-4.25406	-0.461631	0.654821	-3.17736	0.742209	0.0038054	-2.1124	-1.14771	0.184369	-3.89711	0.89104	-2.76103	0.216752	9.26262	-2.11317	-0.173051	-0.096268	2.69914	6.05281	1.44616	3.71908	1.4606	2.06933	-2.07953	1.75156	-5.71388	7.29362	0.697402
	13	0.334569	-3.30115	-0.101045	-1.54571	-0.949294	-0.88303	3.1405	-3.1056	1.16558	1.04225	7.36144	-2.79867	-1.42836	-0.527706	-0.509227	-5.21371	1.2732	2.84685	-1.24944	3.14128	-2.17572	0.00983868	0.0860713	4.92994	5.24667	-0.387288	4.38227	0.399599	2.84363	-1.41211	-1.77554	3.63051	-2.90565	0.758606	-3.08625	-1.26222	3.85842	0.876098	0.274856	-2.41847	3.80056	-1.73424	0.974238	0.279763	1.65621	-3.72463	-1.14749	-0.34321
	14	3.66923	1.75405	0.134281	-1.76659	5.06632	-4.20821	0.620073	4.28599	1.43898	0.204408	2.1263	3.01421	2.56648	3.59397	-2.28505	-0.0144837	0.347694	-2.21038	-0.392832	-1.167	4.37283	2.04608	-3.94013	-0.99466	-2.04463	2.41687	4.14292	-2.06396	1.5567	3.09983	-6.11244	-3.09041	2.04522	1.5135	5.17372	-4.64053	0.0278902	-0.408479	1.78153	1.63304	3.2368	1.26409	-3.68542	-0.950407	-3.97434	1.3935	2.14189	-3.25228
	15	-1.65067	4.49458	-0.826777	-6.946	-3.59408	-0.0103112	-0.966035	0.0116732	0.607753	-1.17319	-0.241232	-6.24397	-1.01374	0.66643	0.766385	-2.28515	-2.45864	-3.18971	3.47487	2.0339	-0.704246	-3.76944	0.0013452	-2.94847	-1.22137	5.02388	1.83876	0.981269	4.01874	1.06107	-3.88692	-0.790015	-2.49787	3.5048	4.78011	4.34225	2.40401	-7.84798	-0.0518171	2.33037	-0.535932	1.44825	-3.57151	1.01376	-1.32147	2.21216	-0.289802	5.99037
	16	1.97235	-0.366131	-0.301872	0.223893	-3.96917	-3.88728	-7.52368	0.603594	1.14341	0.658383	-1.05814	-2.43033	2.32318	0.0532663	-1.78424	-4.14741	-0.530996	-1.21097	2.90981	2.05088	-3.65093	-0.996839	-3.92146	1.2001	-1.51672	-2.36385	-0.544522	1.04292	-0.674648	-1.54265	-2.46304	-4.69658	-1.05838	1.20779	1.50564	2.75271	-2.04441	0.521168	-2.1756	0.0431482	2.71414	-0.327071	1.47453	2.14994	-1.24541	-3.59803	3.74862	-1.94245
	17	4.37245	-3.46453	-2.61719	2.40994	4.11029	-8.88247	5.55256	0.381319	-2.29141	0.439351	0.111256	7.90601	-3.11103	-3.64998	-1.46938	3.72031	-0.615153	0.334228	-5.08408	-0.0215328	-0.310629	3.47097	3.40029	0.15376	2.18586	-1.54472	0.505727	1.98428	-4.57811	0.285667	0.314187	2.22025	0.645446	-2.98268	-3.80723	-1.33517	0.0288903	-0.987411	-0.339023	-2.56074	-1.03176	-2.10208	-5.6045	0.406131	3.64431	-1.53101	-0.878673	-7.88872
	18	-5.04993	-0.855712	-0.540499	1.55762	-1.20954	1.23349	-1.42416	-4.53736	5.21526	0.864081	2.57056	0.648297	-0.339353	-1.76387	1.42474	0.266502	-3.21036	-1.5652	2.28231	-3.86979	-1.08672	3.24579	-1.24441	-4.41626	0.930458	0.983775	-2.20587	-1.49137	3.15755	0.286161	-4.08853	-0.0427796	-3.30561	1.00762	-5.52893	0.967644	-0.119458	1.9641	-2.82991	2.88559	-2.18791	-0.471607	-1.42653	-1.61432	2.41871	-0.252564	-3.45402	0.631484
	19	0.664564	0.767244	-3.94825	1.53464	0.374593	5.03659	-1.18312	-1.82736	-1.30971	-1.36804	3.01623	-3.27069	-7.99626	0.976464	-0.166372	-0.544008	0.110893	-1.75589	-1.08295	-4.86368	0.16266	-1.89919	-0.826935	-0.740998	1.30596	0.407415	-2.48523	-1.95623	-0.522155	-2.56833	-0.284751	-1.14755	0.895656	-0.973091	-1.95151	-1.2133	-3.0164	3.41488	2.51675	-2.00613	-1.33127	-1.11611	0.304446	0.942304	1.81136	6.27302	0.82068	-3.56572
	20	-2.40587	0.00932661	2.74426	3.78504	3.28657	1.04054	3.50324	1.40817	-2.10221	-0.680878	-1.60042	-2.19265	-0.267874	-6.52804	0.544207	3.28772	0.473213	-3.02444	2.16685	-0.861758	-0.60111	-0.0870162	-4.19681	0.698082	-0.343649	1.0813	0.102706	3.2067	-2.19005	0.429947	1.83554	1.42949	-0.74231	-0.652112	2.54697	-4.54019	-2.54655	1.11759	-2.26235	1.12465	-3.14344	0.0149795	-0.857147	-2.31395	-0.756195	0.778812	-2.26795	0.679043
	21	1.17799	2.43441	3.6907	4.1562	-3.32163	1.22797	-6.14417	3.3679	0.603803	3.45306	0.345977	1.45055	-0.177627	3.44677	2.14897	3.59484	-1.13546	0.177172	-2.15876	-3.1708	-3.00743	0.424472	-1.4375	0.506584	1.41228	0.743405	3.58605	3.16306	-1.46384	2.91618	-4.60491	1.07364	0.448908	-4.26372	-0.661972	-6.39214	0.618516	2.26708	3.17661	5.64936	-0.274641	-2.85215	-1.18971	-1.6908	-1.33737	-1.38768	-1.26708	-3.66279
	22	2.55252	4.17522	5.20244	12.6948	-2.46123	-3.82042	3.86876	3.06656	3.15285	-0.252398	-0.720492	7.07945	4.5268	5.47655	6.05493	6.80831	6.18464	2.57812	2.19599	3.98795	-3.54714	-3.8921	0.425977	4.78651	2.12964	7.33437	9.46136	11.6275	0.866434	1.41716	-2.84009	2.4934	-0.780765	1.05466	0.127864	5.05075	5.4284	4.7305	2.28954	13.1072	0.0422394	5.07763	3.32982	2.49607	0.330192	-3.35781	0.444042	-3.08568
	23	9.85766	10.1637	13.1702	22.889	-0.957437	12.016	5.10993	10.431	-2.19019	-4.78535	-0.0379595	3.594	6.27253	14.3713	17.2458	18.2268	0.116549	7.33126	2.45934	4.55762	4.78922	-0.540701	-2.04936	-1.28335	7.52925	13.6373	22.7938	24.9841	1.60399	6.17744	7.11806	7.38415	-1.37925	-3.72784	1.64088	7.91855	7.48822	10.1	11.6738	27.2051	-0.863433	3.28938	5.20664	7.18235	-0.949228	2.06306	2.82539	1.62002
	24	16.4394	20.2694	34.6573	44.4856	-1.0294	9.13879	11.5457	14.6661	-1.74501	0.83332	-8.3896	15.0618	13.0418	32.2885	31.8172	37.8524	-3.70243	9.69219	16.2429	9.73134	5.0262	1.71832	1.66933	8.95433	12.0734	32.341	39.4146	45.3631	-0.194636	11.6747	9.21157	19.574	-3.7665	0.40611	0.654563	10.9977	16.9267	25.0436	28.5543	51.3252	-0.0987936	12.5475	9.9631	19.1422	-4.08111	3.23652	0.17092	14.6236
	25	34.7393	41.5263	57.289	80.6535	0.935702	33.4972	23.6886	26.7525	-0.445961	3.297	0.645051	22.1644	32.5945	52.7956	61.539	70.7872	2.69634	23.6522	29.0415	20.98	2.67185	-0.979413	0.469817	25.6618	25.3894	63.9848	71.9872	84.3765	1.49127	29.4687	22.5506	27.4118	0.830856	4.63334	1.62869	26.4657	31.4817	52.0873	55.2059	94.4341	2.90202	28.7894	28.2256	30.5625	5.54248	0.754275	-1.10311	16.1334
	26	58.049	81.6674	99.6204	142.368	2.91434	64.7323	44.9582	52.292	1.68186	7.66603	4.77252	53.792	57.0381	98.0142	114.235	125.434	-1.04413	46.7918	51.7137	48.8125	4.84157	8.45956	7.39645	56.0195	53.2628	107.636	128.953	145.791	2.78273	60.6631	55.0356	55.804	8.72809	2.90219	1.23477	52.6892	70.5879	104.182	105.831	166.138	3.67953	55.3268	57.2979	58.2366	-0.03665	5.8062	3.01437	43.34
	27	108.937	137.67	163.317	210.142	4.61634	107.698	90.6098	96.0063	7.82006	18.8608	12.3596	89.8258	100.328	170.134	184.311	192.828	7.90718	83.9359	93.9692	82.483	5.57731	13.5991	5.93382	83.6429	90.5669	191.432	217.473	213.68	7.4006	101.43	96.3984	94.388	-0.484632	18.0835	14.321	105.939	123.516	181.088	181.439	246.113	11.1115	99.8562	106.676	101.811	10.0473	15.5801	13.4969	83.8819
	28	181.124	201.75	227.028	280.861	13.59	185.914	158.031	165.128	17.9956	30.3452	28.7057	156.33	170.41	245.274	255.063	257.872	10.7684	154.032	159.19	146.449	10.4294	27.5098	23.6574	150.082	141.485	281.238	304.131	282.195	13.4915	175.58	175.727	166.072	6.97875	29.3063	23.6448	182.071	203.807	264.246	259.067	328.434	17.0171	173.203	180.75	175.276	15.6463	33.5072	29.3452	148.889
	29	254.499	257.888	281.972	337.281	22.7234	268.574	229.287	237.445	32.8533	63.0947	57.1499	223.474	237.445	316.299	316.311	312.071	24.1635	227.846	228.475	213.011	26.9471	50.745	53.6783	218.118	189.94	366.608	378.611	337.994	31.6554	255.362	254.543	239.563	32.4461	60.4262	49.7105	261.228	283.318	344.966	330.94	394.488	31.9457	249.592	259.134	251.167	31.9114	66.8606	53.9524	217.469
	30	322.124	303.11	320.463	380.397	50.2152	346.548	298.497	308.201	62.7301	114.164	106.65	285.376	293.553	372.419	360.148	351.915	42.2281	298.464	296.028	277.977	48.5141	94.0225	91.9048	278.394	231.535	434.979	430.655	375.606	62.9447	329.244	327.683	308.473	52.5471	113.785	96.1873	339.17	354.136	411.094	385.502	438.584	60.8665	324.802	337.434	324.466	61.5382	121.861	99.9161	282.59
	31	370.854	334.432	344.809	407.188	89.8966	403.187	351.324	362.282	110.57	189.513	183.564	340.005	334.173	411.018	387.485	374.696	76.7175	355.936	350.632	327.188	92.8713	173.368	159.383	328.501	261.566	479.616	464.319	400.206	106.384	389.607	385.773	363.72	108.721	198.964	169.6	401.038	407.783	455.43	422.403	467.569	105.161	382.271	401.054	383.759	105.131	202.557	174.702	333.811
	32	403.287	357.815	360.497	425.462	155.517	443.47	390.922	400.556	183.173	267.883	260.965	379.831	361.782	438.36	406.168	390.574	131.946	395.532	388.355	360.876	166.205	254.384	232.315	361.48	284.087	509.472	487.475	416.342	190.872	428.095	427.999	403.694	187.068	289.144	249.641	447.506	442.87	484.625	447.652	489.352	182.227	422.026	446.127	424.721	180.246	287.493	250.79	369.684
	33	425.536	374.75	371.652	436.279	223.087	471.48	416.838	424.422	259.275	338.972	331.47	405.265	380.632	452.8	419.504	400.104	207.247	421.937	413.772	382.764	241.191	331.051	306.859	387.323	297.18	529.57	502.377	429.896	276.657	455.935	458.109	432.304	269.807	374.257	327.385	475.896	466.183	504.106	465.715	505.656	261.629	447.438	475.975	452.733	264.036	364.766	319.242	392.639
	34	441.284	387.205	377.612	444.049	289.378	496.311	437.275	440.26	328.025	391.123	384.823	423.312	393.42	463.655	428.42	406.855	276.398	441.174	431.975	398.388	315.589	388.627	364.422	402.996	307.124	542.211	514.232	438.79	353.154	473.641	478.654	451.355	351.498	440.319	391.891	498.938	479.606	517.748	477.239	516.265	333.509	464.798	496.254	469.418	344.179	425.811	371.97	410.759
	35	449.984	396.153	382.087	450.087	337.906	509.649	449.173	454.152	378.863	422.022	417.852	433.241	400.996	471.655	433.554	412.462	334.16	454.437	444.926	410.685	370.415	426.85	401.373	415.868	311.449	550.323	521.054	443.199	409.604	488.195	494.1	464.299	412.235	480.619	433.102	511.696	489.895	525.213	483.519	521.93	387.469	478.786	512.653	484.573	406.836	461.909	405.599	422.237
	36	454.918	402.781	385.567	452.006	371.095	520.702	459.835	464.208	408.446	440.192	438.568	445.428	405.293	478.683	437.306	415.899	373.266	463.171	453.984	417.747	409.468	448.599	420.82	422.874	317.388	555.294	525.913	444.86	443.076	498.189	506.548	472.124	453.807	503.778	459.965	523.147	495.195	530.298	486.31	524.46	422.132	488.991	522.104	494.288	443.116	482.615	426.181	432.032
	37	459.286	409.042	386.692	453.359	389.495	525.338	465.6	474.471	426.573	452.479	452.003	451.719	409.45	482.599	438.451	418.626	399.532	469.675	458.833	423.793	429.483	462.878	433.946	429.701	320.744	560.43	527.884	445.5	462.568	506.659	515.577	479.483	477.188	518.876	474.988	528.87	501.201	533.451	488.905	525.324	443.372	496.781	529.864	504.108	466.939	493.27	440.938	437.206
	38	464.786	415.017	387.428	454.866	401.71	530.031	469.919	478.838	437.723	460.628	461.41	456.774	412.625	483.59	440.379	416.724	413.927	474.451	462.684	426.906	442.735	470.924	444.209	434.543	323.26	561.543	529.718	446.714	476.173	512.463	522.134	484.997	492.007	529.687	487.381	533.729	503.192	537.067	489.605	525.746	457.402	501.384	535.256	509.325	477.628	500.796	448.729	441.566
	39	465.744	417.986	387.54	456.056	408.335	531.411	469.748	481.877	446.676	466.317	466.63	457.313	414.275	485.481	439.788	416.207	421.611	475.462	463.645	428.326	450.664	477.48	452.566	438.481	323.71	562.291	531.456	447.411	484.605	513.884	524.881	489.226	501.263	537.868	494.562	536.97	504.99	538.505	490.13	527.864	465.154	503.825	540.293	513.376	486.69	508.864	454.07	445.316
	40	461.927	418.114	389.726	455.099	412.053	533.017	468.671	481.307	454.48	469.854	469.58	457.449	413.237	488.537	437.145	418.512	424.788	473.421	463.699	427.598	458.778	481.449	460.137	440.161	324.036	563.148	531.743	448.611	489.451	509.768	527.772	491.483	509.422	544.014	498.227	541.057	503.092	539.632	488.997	529.505	470.614	505.562	542.507	515.919	492.531	517.126	459.647	448.816
[truncated: 48 more columns]

## Sheet: Melt Curve RFU Results
	Temperature	A1	A2	A3	A4	A5	A6	A7	A8	A9	A10	A11	A12	B1	B2	B3	B4	B5	B6	B7	B8	B9	B10	B11	B12	C1	C2	C3	C4	C5	C6	C7	C8	C9	C10	C11	C12	D1	D2	D3	D4	D5	D6	D7	D8	D9	D10	D11	D12
	65	2744.32	2709.78	2669.49	2724.55	2702.63	2916.88	2793.06	2787.26	2736.87	2761.39	2779.07	2759.02	2699.61	2747.16	2729.26	2708.6	2705.66	2781.27	2785.79	2729.18	2742.41	2782.75	2766.62	2791.39	2652.06	2838.35	2798.73	2727.56	2763.83	2790.12	2801.06	2762.34	2795.86	2838.02	2802.87	2883.78	2782.22	2815.54	2770.32	2815.72	2737.89	2819.08	2832.96	2798.69	2797.29	2851.77	2789.32	2792.08
	65.5	2743.68	2710.18	2668.94	2725.02	2702.99	2920.94	2795.59	2789.86	2735.33	2760.31	2778	2761.11	2700.08	2746.93	2729.52	2709.17	2705.66	2784.42	2788.78	2731.73	2741.02	2781.99	2765.86	2793.79	2652.57	2837.54	2798.8	2727.76	2763.12	2793.33	2805.05	2764.69	2795.29	2836.37	2803.05	2885.94	2781.88	2815.59	2771.29	2816.85	2737.35	2821.15	2837.53	2801.14	2797.04	2851.19	2789.87	2794.9
	66	2743.05	2710.58	2668.38	2725.49	2703.35	2925	2798.13	2792.46	2733.78	2759.23	2776.94	2763.21	2700.56	2746.71	2729.77	2709.74	2705.66	2787.57	2791.77	2734.28	2739.62	2781.22	2765.11	2796.19	2653.08	2836.73	2798.86	2727.96	2762.41	2796.54	2809.03	2767.05	2794.71	2834.71	2803.22	2888.11	2781.54	2815.64	2772.25	2817.97	2736.8	2823.22	2842.11	2803.6	2796.8	2850.62	2790.43	2797.73
	66.5	2742.41	2710.99	2667.82	2725.97	2703.7	2929.06	2800.66	2795.06	2732.24	2758.15	2775.87	2765.31	2701.04	2746.49	2730.03	2710.31	2705.66	2790.72	2794.76	2736.83	2738.23	2780.46	2764.35	2798.59	2653.59	2835.92	2798.93	2728.16	2761.71	2799.75	2813.02	2769.41	2794.14	2833.06	2803.4	2890.27	2781.2	2815.68	2773.21	2819.09	2736.26	2825.29	2846.69	2806.05	2796.56	2850.04	2790.99	2800.55
	67	2741.78	2711.39	2667.27	2726.44	2704.06	2933.11	2803.2	2797.66	2730.7	2757.08	2774.81	2767.41	2701.52	2746.27	2730.29	2710.88	2705.66	2793.87	2797.75	2739.38	2736.84	2779.7	2763.59	2800.99	2654.1	2835.11	2799	2728.36	2761	2802.96	2817.01	2771.77	2793.56	2831.41	2803.57	2892.44	2780.86	2815.73	2774.17	2820.21	2735.71	2827.36	2851.27	2808.5	2796.32	2849.46	2791.54	2803.37
	67.5	2741.15	2711.79	2666.71	2726.91	2704.42	2937.17	2805.73	2800.26	2729.16	2756	2773.74	2769.5	2701.99	2746.04	2730.54	2711.45	2705.65	2797.02	2800.74	2741.93	2735.44	2778.93	2762.84	2803.39	2654.61	2834.3	2799.06	2728.55	2760.29	2806.17	2820.99	2774.12	2792.99	2829.76	2803.75	2894.6	2780.51	2815.77	2775.13	2821.34	2735.17	2829.43	2855.85	2810.96	2796.07	2848.89	2792.1	2806.2
	68	2740.51	2712.2	2666.15	2727.38	2704.77	2941.23	2808.27	2802.86	2727.62	2754.92	2772.68	2771.6	2702.47	2745.82	2730.8	2712.02	2705.65	2800.16	2803.73	2744.48	2734.05	2778.17	2762.08	2805.79	2655.12	2833.49	2799.13	2728.75	2759.58	2809.39	2824.98	2776.48	2792.42	2828.11	2803.92	2896.77	2780.17	2815.82	2776.09	2822.46	2734.62	2831.5	2860.43	2813.41	2795.83	2848.31	2792.65	2809.02
	68.5	2740.67	2713.1	2665.99	2728.43	2705.74	2946.01	2811.75	2806.02	2726.29	2754.47	2772.49	2774.64	2703.48	2746.2	2731.7	2713.3	2706.02	2803.83	2807.23	2747.5	2733.49	2777.82	2762.41	2809.2	2656.46	2833.35	2799.82	2729.49	2759.36	2813.15	2830.53	2779.18	2792.47	2826.97	2804.28	2899.59	2780.77	2816.44	2777.47	2824.13	2734.71	2834.41	2865.26	2816.67	2796.38	2847.77	2793.4	2812.23
	69	2741.76	2714.79	2666.49	2730.34	2707.45	2950.57	2815.76	2809.63	2725.47	2754.28	2772.79	2778.54	2704.73	2747.08	2732.85	2715.35	2706.95	2808.14	2811.67	2751.52	2732.82	2777.82	2763.27	2813.91	2658.24	2834.23	2801.31	2730.83	2759.94	2817.59	2836.93	2781.72	2793.31	2826.23	2805.19	2902.83	2782.15	2817.32	2779.29	2826.46	2735.62	2837.9	2869.6	2820.02	2797.09	2847.58	2794.36	2815.89
	69.5	2743.57	2717.23	2667.61	2732.61	2709.45	2955.05	2819.51	2812.82	2724.91	2754.67	2773.35	2782.55	2706.74	2748.52	2734.44	2718.11	2708.27	2812.51	2816.19	2755.72	2732.79	2778.03	2764.12	2818.65	2660.09	2835.85	2803.62	2732.7	2760.97	2821.51	2843.17	2783.76	2794.87	2827.01	2806.78	2906.42	2784.26	2818.68	2781.42	2829.02	2737.25	2841.3	2872.29	2822.62	2797.75	2847.95	2795.5	2819.55
	70	2745.74	2719.49	2669.29	2735.56	2711.29	2958.27	2822.51	2815.22	2724.42	2755.61	2774.86	2786.49	2709.05	2750.69	2736.45	2721.33	2709.88	2815.93	2820	2759.48	2733.51	2778.76	2765.92	2822.95	2661.68	2837.93	2806.47	2734.98	2762.03	2824.44	2848.37	2784.96	2796.41	2828.91	2808.46	2909.91	2786.87	2820.72	2783.63	2831.1	2739.32	2843.95	2872.85	2824.51	2798.64	2849.6	2795.5	2823.01
	70.5	2748.07	2722	2671.32	2738.38	2712.9	2959.26	2823.63	2815.73	2723.7	2757.04	2776.81	2789.58	2711.45	2752.83	2738.6	2724.53	2711.46	2817.15	2822.4	2761.8	2734.73	2779.44	2768	2825.86	2663.23	2840.59	2809.51	2737.25	2763.76	2825.22	2851.36	2784.73	2798.21	2831.4	2810.21	2912.62	2789.83	2823	2785.73	2832.73	2741.29	2845	2870.46	2824.12	2800.38	2851.93	2794.86	2825.52
	71	2750.36	2724.34	2673.63	2740.68	2714.28	2957.15	2822.35	2813.84	2722.76	2758.54	2779.13	2790.96	2713.51	2754.76	2740.77	2726.89	2713.14	2815.86	2822.99	2762.05	2736.28	2780.91	2769.69	2826.79	2664.24	2843.59	2812.1	2738.88	2765.46	2823.54	2850.79	2782.88	2800.07	2834.61	2812.27	2913.75	2792.23	2825.02	2787.3	2833.16	2742.74	2843.5	2864.99	2820.72	2801.99	2854.9	2793.99	2826.8
	71.5	2752.49	2726.03	2675.39	2741.67	2714.77	2952.42	2818.69	2809.24	2721.27	2759.78	2781.36	2789.98	2714.8	2756.05	2742.77	2728.48	2714.2	2811.92	2820.91	2759.53	2738.11	2782.14	2770.86	2824.84	2664.49	2845.74	2813.91	2739.23	2766.72	2818.99	2846.72	2779.03	2801.33	2837.77	2813.64	2912.76	2793.46	2826.19	2787.6	2831.99	2743.21	2839.29	2856.85	2814.93	2803.65	2857.92	2792.39	2825.9
	72	2753.87	2726.51	2676.18	2741.11	2714.04	2944.79	2813.12	2802.95	2719.28	2760.62	2783.13	2786.45	2714.63	2755.97	2744.09	2728.4	2714.19	2805.58	2816.61	2754.5	2739.41	2782.94	2771.52	2820.49	2663.47	2846.96	2814.17	2737.74	2766.98	2812.02	2839.99	2773.35	2801.94	2840.14	2814.09	2909.47	2793.34	2826.36	2786.13	2829.2	2742.2	2832.67	2847.18	2807.37	2805.06	2860.15	2789.65	2823.05
	72.5	2754.2	2725.64	2675.25	2738.6	2712.15	2935.36	2805.9	2794.88	2716.49	2760.48	2783.45	2780.85	2712.93	2754.28	2743.91	2726.57	2712.71	2797.67	2810.47	2747.58	2739.69	2782.74	2770.32	2813.78	2661.26	2846.71	2812.68	2734.6	2766.06	2803.41	2830.92	2765.79	2801.38	2840.88	2813.55	2903.78	2791.29	2824.77	2782.7	2824.63	2739.36	2824.1	2836.28	2798.18	2805.45	2860.51	2786.51	2817.97
	73	2753.11	2722.82	2672.87	2734.4	2708.87	2924.76	2797.95	2786.1	2713.06	2758.64	2782.37	2772.99	2709.59	2751.12	2742.03	2722.95	2709.83	2789.05	2803.13	2739.41	2738.39	2781.47	2767.61	2805.75	2657.44	2844.21	2808.87	2729.94	2763.11	2793.92	2820.78	2756.91	2799.47	2839.77	2811.2	2896.15	2787.21	2820.92	2777.4	2818.15	2734.81	2814.34	2825.21	2788.8	2803.82	2859.02	2782.48	2811
	73.5	2750.05	2718.17	2668.72	2728.67	2703.85	2914.07	2789.63	2777.08	2708.85	2755.25	2779.29	2764.07	2704.91	2746.37	2738.49	2717.96	2705.15	2780.23	2794.78	2730.68	2735.16	2778.2	2763.36	2796.54	2652.3	2839.32	2803.33	2723.85	2757.63	2784.05	2810.4	2746.9	2795.65	2836.09	2806.9	2887.17	2781.87	2815.32	2770.37	2810.42	2728.67	2803.92	2814.43	2779.44	2800.1	2855.69	2776.63	2802.78
	74	2745.19	2711.66	2663.44	2721.72	2697.48	2903.58	2780.85	2768.24	2703.74	2750.21	2774.58	2754.65	2699.43	2740.48	2733.53	2711.41	2698.84	2771.49	2786.26	2721.99	2730.21	2773.44	2757.88	2786.92	2646.13	2832.91	2796.37	2716.63	2750.14	2773.91	2800.16	2737.02	2790.02	2830.74	2800.89	2877.13	2775.7	2808.53	2762.06	2801.78	2721.31	2793.28	2804.19	2770.01	2794.46	2849.97	2770.05	2794.12
	74.5	2738.88	2704.29	2657.37	2713.87	2690.03	2893.5	2771.99	2759.26	2697.69	2743.7	2768.09	2745.43	2693.09	2733.85	2726.92	2704.19	2691.33	2762.73	2777.54	2713.6	2723.6	2767.28	2750.94	2777.32	2639.43	2824.77	2788	2708.94	2740.95	2764.21	2789.92	2726.72	2782.73	2823.31	2793.12	2866.66	2768.36	2800.25	2753.01	2792.32	2713.23	2782.73	2794.3	2760.64	2787.11	2842.56	2762.76	2784.93
	75	2731.6	2696.04	2651.36	2705.7	2681.79	2883.78	2763.03	2750.29	2690.93	2735.96	2760.75	2736.25	2686.38	2726.45	2719.94	2696.4	2682.98	2754.16	2768.98	2705.44	2715.79	2760.02	2743.34	2768.17	2632.53	2815.62	2778.85	2700.87	2730.44	2754.5	2780	2716.75	2774.53	2814.7	2784.27	2855.71	2760.63	2791.15	2743.47	2782.59	2704.8	2772.71	2784.65	2751.46	2778.4	2834.22	2754.75	2775.88
	75.5	2723.39	2687.69	2644.65	2697.14	2673.04	2874.15	2754.11	2741.47	2683.57	2727.34	2752.44	2727.69	2679.11	2718.6	2712.62	2688.34	2673.81	2745.65	2760.58	2697.22	2707.33	2751.78	2734.86	2759.08	2625.63	2805.97	2769.3	2692.46	2719.55	2744.93	2770.04	2707.09	2765.13	2805.39	2774.87	2845.15	2752.71	2781.81	2733.89	2773.1	2696.08	2762.89	2775.35	2742.06	2769.03	2825.18	2746.41	2767.29
	76	2714.96	2679.31	2637.92	2688.21	2664.39	2864.12	2744.85	2732.42	2675.78	2718.31	2743.81	2719.29	2671.82	2710.61	2705.01	2680.21	2664.52	2737.04	2752.15	2689	2698.68	2743.07	2726.32	2750.53	2618.88	2796.09	2759.74	2683.79	2709.14	2735.33	2760.14	2698.16	2755.36	2796.28	2765.13	2834.59	2744.05	2772.28	2724.1	2763.69	2687.2	2753.45	2765.69	2732.6	2759.85	2815.06	2738.64	2758.96
	76.5	2706.37	2671.55	2630.94	2679.54	2655.79	2853.55	2735.93	2723.02	2667.84	2709.52	2734.65	2711.03	2664.1	2702.29	2696.98	2672.48	2655.36	2728.2	2743.53	2680.71	2689.96	2733.81	2717.13	2742.25	2612.17	2785.92	2749.79	2675.18	2698.97	2726.01	2750.03	2688.83	2745.36	2786.55	2755.4	2824.22	2734.86	2762.52	2714.34	2754.16	2678.13	2744.09	2755.6	2722.99	2750.41	2805.14	2730.42	2750.34
	77	2697.62	2663.74	2623.85	2671.22	2647.5	2842.58	2726.73	2713.19	2659.84	2700.63	2726.1	2702.6	2656.46	2693.69	2689.49	2664.98	2646.39	2719.37	2734.42	2671.85	2681.38	2724.44	2707.76	2733.95	2605.59	2775.89	2740.37	2666.4	2689.17	2716.11	2739.67	2679.88	2735.21	2776.89	2745.74	2813.76	2725.66	2752.91	2704.7	2744.69	2668.95	2734.58	2745.1	2713.26	2741.27	2795.22	2721.65	2741.87
	77.5	2688.78	2656.44	2616.26	2662.9	2639.49	2830.57	2717.28	2703.22	2651.84	2691.73	2717.25	2693.96	2648.67	2685.07	2681.55	2657.64	2637.83	2709.89	2724.47	2662.39	2672.68	2715.03	2698.31	2725.52	2599.18	2766.06	2730.76	2657.41	2679.77	2705.77	2728.54	2670.84	2724.71	2766.97	2735.82	2803.51	2716.37	2743.27	2695.22	2735.26	2659.58	2724.44	2733.99	2702.76	2732.08	2785.07	2712.48	2733.19
	78	2680.41	2649.08	2609.35	2654.89	2631.88	2818.12	2707.07	2692.23	2643.52	2683.1	2708.63	2684.69	2641.31	2676.41	2673.43	2650.45	2629.69	2699.55	2713.46	2652.46	2663.98	2705.63	2689.21	2717.32	2592.69	2756.3	2721.48	2648.28	2670.18	2694.46	2716.78	2661.56	2714.34	2756.69	2725.98	2792.2	2706.97	2733.88	2685.83	2725.37	2649.99	2713.6	2721.87	2691.46	2722.75	2774.69	2702.65	2723.79
	78.5	2672.28	2641.98	2602.34	2647.31	2623.88	2805.23	2696.35	2680.53	2634.82	2674	2699.72	2674.67	2633.62	2667.82	2665.27	2643.35	2621.59	2687.94	2701.53	2641.76	2654.65	2695.85	2679.38	2708.04	2586.38	2746.45	2711.86	2639.61	2660.22	2682.41	2704.05	2651.45	2703.57	2745.69	2715.71	2780.02	2698	2724.41	2676.74	2715.34	2640.44	2701.7	2709.03	2679.34	2712.11	2764.38	2691.41	2713.26
	79	2664.06	2634.51	2595.37	2639.39	2615.64	2791.57	2684	2667.86	2625.49	2664.1	2690.66	2663.18	2626.14	2659.23	2657.3	2635.72	2613.36	2675.05	2688.2	2629.73	2644.45	2685.38	2669.61	2697.8	2579.93	2736.58	2702.39	2630.85	2649.61	2668.94	2690.25	2640.66	2692.57	2734.42	2704.89	2766.62	2689.14	2715.03	2667.6	2705.31	2630.77	2688.63	2695.08	2666.01	2700.52	2753.44	2679.51	2702.08
	79.5	2656.12	2626.78	2588.49	2631.17	2606.85	2776.16	2669.89	2654.09	2615.04	2653.3	2680.32	2649.95	2618.66	2650.68	2648.78	2627.49	2604.63	2660.37	2673.82	2616.51	2633.24	2673.75	2659.47	2686.18	2573.17	2726.61	2692.26	2622.04	2638.21	2653.78	2674.79	2628.36	2680.88	2722.43	2693.27	2751.35	2680.18	2705.43	2658.29	2695.07	2619.99	2673.71	2679.14	2650.62	2686.97	2741.62	2666.95	2689.23
	80	2648	2618.28	2581.36	2622.24	2596.67	2759.23	2653.63	2638.34	2602.82	2640.99	2668.62	2634.32	2610.63	2641.96	2639.96	2618.67	2594.48	2643.5	2657.71	2601.2	2620.64	2659.95	2648	2672.43	2565.8	2715.91	2681.92	2612.89	2625.19	2636.36	2657.55	2613.75	2667.51	2708.99	2680.36	2733.55	2670.73	2695.43	2648.38	2684.2	2607.88	2656.42	2660.95	2633.28	2671.62	2728.7	2653.2	2673.95
	80.5	2638.77	2608.9	2572.81	2612	2584.18	2738.62	2634.16	2619.84	2588.76	2626.41	2654.47	2615.43	2601.54	2632.11	2630.18	2608.68	2582.56	2623.83	2638.69	2582.89	2605.36	2642.99	2633.86	2654.96	2557.73	2703.88	2670.06	2602.73	2610.03	2615.72	2636.56	2595.6	2651.16	2692.68	2664.98	2712.62	2660.02	2683.92	2636.8	2672.27	2593.79	2635.75	2639.15	2612.71	2653.42	2713.23	2637.38	2655.57
	81	2626.95	2596.69	2562.44	2599.06	2568.61	2712.33	2609.27	2596.61	2571.19	2608.03	2636.36	2591.17	2590.24	2619.36	2617.97	2596.1	2567.26	2599.68	2614.63	2559.71	2586.19	2621.42	2615.91	2632.92	2546.99	2688.77	2655.13	2589.07	2590.79	2589.36	2609.35	2571.74	2630.24	2671.11	2645.5	2685.69	2646.41	2669.29	2622.31	2657.19	2575.7	2609.47	2611.24	2586.66	2631.77	2693.51	2618.26	2632.4
	81.5	2609.35	2578.8	2547.34	2580.78	2547.92	2678.76	2577.85	2566.92	2548.04	2583.23	2611.89	2560.64	2573.12	2600.51	2599.98	2578.05	2546.3	2569.01	2584.15	2530.46	2561.22	2593.5	2591.36	2604.31	2530.91	2665.95	2633.21	2568.84	2565.56	2555.86	2574.14	2541.08	2601.54	2641.11	2618.87	2650.72	2626.31	2647.4	2601.42	2635.16	2551.53	2575.91	2575.64	2554.11	2603.91	2666.71	2592.87	2602.06
	82	2582.45	2552.72	2524.73	2554.15	2520.65	2638.41	2540.25	2530.65	2518.52	2550.82	2579.84	2523.9	2547.6	2572.57	2573.64	2551.97	2518.68	2532.41	2547.13	2495.55	2529.18	2558.37	2559.04	2569.17	2508.22	2632.11	2601.74	2540.07	2533.02	2516.03	2531.72	2504.17	2564.34	2601.1	2584.03	2607.71	2596.96	2615.3	2571.6	2603.4	2520.81	2535.81	2532.93	2515.79	2569.31	2631.51	2560.72	2565.17
	82.5	2546.07	2518.59	2494.57	2519.5	2488	2592.66	2497.83	2489.7	2483.66	2511.93	2540.79	2482.61	2514.11	2535.11	2538.75	2517.95	2485.25	2491.3	2505.52	2457.19	2491.61	2517.56	2520.44	2528.7	2479.12	2587.26	2559.9	2503.06	2494.36	2471.64	2483.38	2462.36	2520.22	2552.93	2541.62	2558.16	2558.03	2572.76	2533.23	2562.06	2484.2	2490.9	2484.79	2472.93	2528.56	2588.46	2522.6	2523.33
	83	2501.71	2477.6	2458.04	2477.68	2451.86	2545.17	2453.67	2446.95	2444.63	2468.41	2496.31	2439.7	2473.77	2489.8	2496.69	2477.31	2447.06	2448.08	2462.19	2417.7	2450.92	2473.68	2478.02	2486.32	2444.79	2533.15	2509.9	2459.26	2451.71	2425.77	2433.38	2418.9	2471.97	2499.94	2493.79	2505.51	2511.09	2521.47	2488.26	2512.89	2443.29	2444.35	2434.89	2428.41	2484.28	2540.47	2480.88	2479.25
	83.5	2452.78	2433.28	2417.26	2432.06	2415.09	2500.97	2413.07	2406.82	2405.44	2424.47	2451.06	2400.17	2429.84	2440.23	2450.45	2433.11	2407.96	2408.03	2422.58	2381.81	2410.75	2430.83	2435.6	2446.95	2408.58	2473.82	2455.55	2413.16	2409.14	2383.86	2387.88	2379.34	2424.1	2447.18	2445.24	2456.4	2459.17	2465.52	2439.63	2460.23	2402.21	2401.79	2389.54	2387.94	2440.03	2491.68	2439.79	2437.85
	84	2406.65	2392.53	2378.22	2389.11	2382.44	2465.3	2380.84	2374.12	2371.05	2385.95	2410.58	2368.36	2389.6	2393.76	2407.2	2392.02	2373.26	2375.68	2391.03	2353.96	2376.02	2394.16	2399	2415.17	2376.77	2418.83	2404.99	2372.21	2372.02	2350.79	2351.69	2347.18	2383.39	2401.87	2402.48	2416.29	2410.38	2413.33	2395.24	2411.82	2366.01	2368.06	2353.57	2355.5	2402.24	2448.66	2404.98	2404.25
	84.5	2370.01	2360.67	2346.52	2355.04	2357.48	2439.65	2358.06	2350.39	2344.61	2356.69	2379.06	2345.62	2358.27	2356.66	2372.87	2359.83	2346.13	2351.98	2368.65	2334.57	2350.36	2366.93	2371.78	2392.41	2352.68	2375.36	2364.54	2340.88	2344.17	2327.56	2325.81	2323.42	2353.02	2368.46	2369.4	2387.6	2371.05	2371.8	2360.49	2373.92	2338.29	2344.39	2328.49	2331.92	2373.68	2415.82	2378.89	2379.96
	85	2344.16	2338.83	2323.99	2330.96	2340.37	2423.12	2344.2	2334.81	2326.58	2336.66	2357.49	2331.33	2336.68	2330.72	2348.61	2337.4	2327.39	2336.68	2354.55	2322.58	2333.38	2348.92	2353.86	2378.54	2336.53	2344.99	2336.62	2319.74	2325.85	2313.03	2310.01	2308.55	2333.13	2346.63	2347.03	2369.92	2343.3	2342.7	2336.49	2347.98	2319.38	2329.88	2313.31	2316.93	2354.98	2393.68	2361.78	2364.8
	85.5	2328.5	2326.17	2310.39	2316.68	2330.33	2414.1	2337.66	2325.88	2316.25	2325.16	2345.4	2324.06	2324.18	2315.24	2334.14	2324.23	2316.71	2328.66	2347.78	2316.98	2323.67	2339.01	2343.96	2371.58	2327.46	2327.05	2319.97	2308.17	2315.57	2305.62	2302.14	2300.77	2322.3	2334.39	2334.56	2360.94	2326.45	2325.44	2322.24	2332.98	2308.6	2322.66	2305.98	2309.43	2344.4	2380.75	2352.45	2357.1
	86	2321.47	2321.07	2304.35	2310.42	2325.76	2410.02	2335.31	2321.5	2311.36	2319.89	2340.22	2321.14	2319.04	2308.49	2328.04	2318.58	2311.71	2324.62	2344.95	2314.96	2319.69	2334.83	2340.14	2368.69	2323.73	2319.43	2312.69	2303.67	2311.24	2302.65	2298.68	2297.05	2317.97	2329.22	2328.9	2357.08	2319.04	2317.62	2316.14	2326.2	2303.58	2319.85	2303.02	2305.97	2340.02	2374.84	2348.1	2353.83
	86.5	2319.01	2319.49	2302.88	2308.53	2323.94	2407.9	2334.02	2318.96	2309.47	2317.78	2338.86	2319.95	2317.19	2306.4	2326.23	2317.4	2309.71	2322.34	2343.43	2313.84	2318.69	2333.35	2339.11	2367.38	2322.36	2316.91	2310.42	2302.19	2309.97	2301.21	2297.27	2295.56	2316.59	2327.32	2326.98	2355.52	2316.56	2315.1	2313.98	2324.38	2301.86	2318.63	2301.61	2304.22	2338.1	2372.72	2346.05	2352.28
	87	2317.79	2319.1	2302.93	2307.74	2322.94	2406.42	2333.37	2317.57	2308.85	2316.34	2338.64	2319.18	2316.25	2305.62	2325.73	2317.18	2309.03	2320.82	2342.5	2313.25	2318.44	2332.3	2338.21	2366.73	2321.24	2315.79	2309.8	2301.37	2309.48	2300.21	2296.35	2295.12	2315.91	2326.09	2326.43	2354.61	2315.54	2314.4	2313.28	2324.01	2300.77	2317.66	2300.5	2303.37	2337.36	2371.82	2344.65	2351.31
	87.5	2317.43	2318.74	2302.96	2307.33	2322.1	2405.65	2332.65	2316.73	2308.59	2315.45	2338.23	2318.59	2315.56	2304.99	2325.85	2317.15	2308.51	2319.74	2341.97	2312.96	2317.94	2331.73	2337.5	2366.19	2320.26	2314.96	2309.13	2300.66	2308.86	2299.59	2295.45	2294.79	2315.39	2324.88	2326.02	2353.84	2314.68	2314.11	2312.6	2323.53	2299.77	2316.94	2299.57	2302.95	2336.48	2371.06	2343.58	2350.26
	88	2317.37	2318.59	2302.55	2306.93	2321.24	2405.49	2331.93	2316.29	2308.51	2314.53	2337.86	2317.92	2314.77	2304.56	2326.06	2317.01	2308.03	2318.62	2341.07	2312.48	2317.84	2331.01	2336.88	2365.93	2319.52	2314.14	2308.55	2299.99	2308.38	2299.39	2294.59	2294.46	2314.86	2324.04	2325.22	2353.38	2313.84	2313.94	2311.93	2322.9	2298.84	2316.61	2298.98	2302.71	2335.86	2370.67	2342.42	2349.38
	88.5	2317.21	2318.21	2302.09	2306.45	2320.46	2405.56	2331.28	2316.14	2308.76	2313.89	2337.24	2317.07	2314.05	2304.01	2326.09	2316.81	2307.83	2317.75	2340.14	2311.97	2317.41	2330.12	2336.19	2365.49	2319.08	2313.29	2308	2299.39	2308.14	2299.05	2293.79	2293.97	2314.17	2323.38	2324.72	2352.96	2313.05	2314.2	2311.37	2322.64	2298	2316.44	2298.58	2302.47	2335.19	2370.47	2341.67	2348.96
	89	2317.36	2317.82	2301.46	2306.01	2319.57	2405.02	2330.97	2316.11	2308.85	2313.21	2336.27	2316.02	2313.44	2303.3	2326.02	2315.99	2307.57	2316.92	2339.44	2311.77	2316.71	2329.15	2335.37	2364.73	2318.68	2312.68	2307.43	2299.11	2307.92	2298.54	2292.6	2293.14	2313.14	2322.85	2324.09	2352.44	2312.41	2314.37	2311.23	2321.74	2296.89	2316.2	2298.16	2302.08	2334.58	2370.03	2341.01	2349.02
	89.5	2317.43	2317.14	2300.78	2305.84	2318.52	2404.38	2330.11	2315.37	2308.54	2312.8	2335.25	2315.2	2313.02	2302.65	2325.85	2315.2	2307.07	2316.33	2338.47	2311.46	2315.79	2328.37	2335.33	2364.03	2318.27	2312.2	2306.62	2299.04	2307.41	2297.84	2291.92	2292.23	2312.37	2322.53	2323.25	2351.7	2312.08	2314.2	2310.59	2320.67	2296.21	2315.72	2297.94	2301.7	2333.68	2369.31	2340.35	2349.1
	90	2316.96	2316.58	2300.3	2305.69	2317.59	2403.54	2329.39	2314.58	2308	2312.25	2334.82	2314.44	2312.38	2302.09	2325.54	2314.43	2306.63	2315.69	2337.58	2310.9	2315.31	2327.4	2334.99	2363.34	2317.82	2311.84	2305.88	2299.07	2306.99	2297.23	2291.68	2291.32	2311.51	2322.27	2322.44	2351.1	2311.75	2313.9	2310.05	2319.76	2295.64	2315.24	2297.8	2301.15	2332.8	2368.63	2339.47	2349.26
	90.5	2316.42	2315.7	2300.2	2305.4	2316.64	2402.29	2328.39	2313.99	2307.53	2311.88	2334.2	2313.49	2312.05	2301.43	2324.94	2313.82	2306.2	2315.22	2336.85	2310.47	2314.57	2326.43	2334.39	2362.51	2317.33	2311.27	2305.17	2298.92	2306.83	2296.44	2291.5	2290.23	2310.45	2321.75	2321.89	2350.72	2311.5	2313.52	2309.61	2319.07	2295.12	2314.68	2297.45	2300.39	2332.17	2367.92	2338.71	2349.06
	91	2315.88	2314.74	2299.88	2304.81	2315.75	2400.76	2327.42	2313.18	2306.75	2311.14	2333.24	2312.72	2311.59	2300.64	2324.08	2313.47	2305.62	2314.86	2336.28	2310.16	2313.95	2325.54	2333.34	2361.88	2316.73	2310.75	2304.52	2298.82	2306.41	2295.71	2291.42	2289.26	2309.66	2321.23	2321.18	2350.56	2310.99	2312.78	2309	2318.46	2294.59	2313.73	2296.97	2299.81	2331.49	2367.14	2337.86	2348.65
	91.5	2315.05	2314.02	2299.43	2304.25	2315.04	2399.85	2326.28	2312.3	2305.98	2310.63	2332.54	2311.97	2311.22	2299.97	2323.3	2313.39	2305.13	2314.47	2335.61	2309.49	2313.7	2324.78	2332.29	2361.66	2316.11	2310.22	2304.04	2298.47	2305.75	2295.1	2291.55	2288.44	2309.14	2320.53	2320.43	2350.64	2310.47	2311.89	2307.85	2318.34	2294.47	2312.97	2296.66	2299.29	2330.76	2366.74	2337.14	2347.89
	92	2314.42	2313.29	2298.82	2303.56	2314.92	2399.32	2325.55	2311.95	2305.23	2310.18	2332.21	2311.24	2310.21	2299.27	2322.4	2313.25	2304.77	2313.87	2335.27	2308.77	2313.29	2324.26	2330.99	2361.32	2315.75	2309.64	2303.88	2297.72	2305.5	2294.9	2291.03	2287.69	2308.51	2319.54	2319.63	2350.81	2309.97	2311.09	2306.95	2318.31	2294.09	2312.62	2296.01	2298.6	2330.2	2366.24	2336.63	2347.16
	92.5	2314.06	2312.34	2298.32	2302.5	2314.92	2398.55	2324.85	2311.79	2304.67	2309.93	2331.66	2310.74	2309.4	2298.66	2321.4	2312.99	2304.55	2313.26	2334.81	2308.07	2312.49	2323.85	2329.97	2361.11	2315.24	2308.8	2303.82	2296.9	2305.14	2294.68	2290.28	2286.95	2308.01	2318.41	2318.96	2350.68	2309.57	2310.36	2306.41	2318.31	2293.91	2312.38	2295.45	2298.12	2330.04	2365.93	2336.34	2346.38
	93	2313.74	2311.39	2297.65	2301.7	2315.11	2397.87	2324.35	2311.4	2303.67	2309.65	2331.17	2310.65	2308.42	2298.16	2320.52	2312.32	2304.1	2312.59	2334.28	2307.36	2311.82	2323.64	2329.33	2360.77	2314.7	2308.34	2303.62	2296.29	2304.23	2294.26	2289.18	2286.37	2307.77	2317.71	2318.21	2350.16	2309.18	2309.85	2306.05	2318.4	2293.57	2311.7	2294.82	2297.54	2329.36	2365.52	2335.98	2345.84
	93.5	2313.44	2310.9	2297.3	2301.28	2315.54	2397.28	2323.8	2311.26	2302.61	2309.85	2331.29	2310.63	2307.56	2298.03	2319.97	2311.34	2303.79	2311.68	2333.69	2306.5	2310.68	2323.82	2329.49	2360.46	2314.1	2307.74	2303.04	2295.41	2303.41	2294.08	2288.05	2286.05	2307.39	2317.07	2317.68	2349.49	2309.18	2309.64	2306.06	2318.32	2293.28	2311.14	2294.16	2296.8	2329.32	2364.85	2335.59	2345.24
	94	2312.97	2309.74	2296.76	2300.81	2315.96	2397.09	2323.3	2311.53	2301.01	2309.84	2330.84	2310.49	2307.11	2298.06	2319.29	2310.01	2303.35	2310.87	2332.81	2305.91	2310.04	2324.02	2329.36	2359.35	2313.84	2307.41	2301.97	2294.76	2302.04	2293.11	2286.3	2285.21	2306.82	2317.44	2317.19	2349.01	2309	2310.19	2306.1	2318	2292.62	2309.93	2292.86	2295.86	2328.35	2363.85	2334.98	2344.45
	94.5	2312.49	2308.79	2296.43	2300.46	2316.2	2396.43	2322.7	2311.59	2299.36	2309.91	2330.31	2310.49	2306.94	2298.26	2318.76	2308.47	2302.8	2310.05	2331.86	2305.28	2309.24	2324.22	2329.6	2358.28	2313.25	2307.11	2300.71	2294.31	2300.36	2292.01	2284.79	2284.54	2306.36	2317.95	2316.86	2348.29	2308.83	2310.84	2306.44	2317.74	2291.94	2308.4	2291.78	2294.99	2327.55	2362.92	2334.24	2343.68
	95	2311.12	2306.72	2295.28	2300.07	2316.2	2397.55	2321.96	2312.56	2296.66	2309.65	2328.73	2309.52	2307.87	2298.52	2318.02	2306.63	2302.1	2309.42	2330.23	2305.12	2310.58	2324.36	2328.6	2355.64	2313.88	2307.48	2298.6	2294.06	2297.62	2289.18	2282.24	2282.6	2305.3	2320.56	2316.38	2348.91	2308.17	2312.63	2305.72	2317.08	2290.94	2306.08	2289.29	2293.54	2324.37	2361.67	2333.22	2342.32
[truncated: 48 more columns]

## Sheet: Melt Curve Plate View Results
		1	2	3	4	5	6	7	8	9	10	11	12
A	Content	Unkn	Unkn	Unkn	Unkn	Unkn	Unkn	Unkn	Unkn	Unkn	Unkn	Unkn	Unkn
A	Sample
A	Peak 1	83.5	83.5	83.5	83.5	83	82.5	82.5	82.5	83	83	83	82.5
A	Peak 2	None	None	None	None	None	None	None	None	None	None	None	None
B	Content	Unkn	Unkn	Unkn	Unkn	Unkn	Unkn	Unkn	Unkn	Unkn	Unkn	Unkn	Unkn
B	Sample
B	Peak 1	83.5	83.5	83.5	83.5	83	82.5	82.5	82.5	83	83	83	82.5
B	Peak 2	None	None	None	None	None	None	None	None	None	None	None	None
C	Content	Unkn	Unkn	Unkn	Unkn	Unkn	Unkn	Unkn	Unkn	Unkn	Unkn	Unkn	Unkn
C	Sample
C	Peak 1	83	83.5	83.5	83	83	82.5	82.5	82.5	83	83	83	82.5
C	Peak 2	None	None	None	None	None	None	None	None	None	None	None	None
D	Content	Unkn	Unkn	Unkn	Unkn	Unkn	Unkn	Unkn	Unkn	Unkn	Unkn	Unkn	Unkn
D	Sample
D	Peak 1	83.5	83.5	83	83	83	82.5	82.5	82.5	83	83	83	83
D	Peak 2	None	None	None	None	None	None	None	None	None	None	None	None
E	Content	Unkn	Unkn	Unkn	Unkn	Unkn	Unkn	Unkn	Unkn	Unkn	Unkn	Unkn	Unkn
E	Sample
E	Peak 1	83.5	83.5	83.5	83.5	83.5	83.5	83.5	83.5	83.5	83.5	83.5	84
E	Peak 2	None	None	None	None	None	None	None	None	None	None	None	None
F	Content	Unkn	Unkn	Unkn	Unkn	Unkn	Unkn	Unkn	Unkn	Unkn	Unkn	Unkn	Unkn
F	Sample
F	Peak 1	83.5	83.5	83.5	83.5	83.5	83.5	83.5	83.5	83.5	83.5	83.5	83.5
F	Peak 2	None	None	None	None	None	None	None	None	None	None	None	None
G	Content	Unkn	Unkn	Unkn	Unkn	Unkn	Unkn	Unkn	Unkn	Unkn	Unkn	Unkn	Unkn
G	Sample
G	Peak 1	83.5	83.5	83.5	83.5	83.5	83.5	83.5	83.5	83.5	83.5	83.5	83.5
G	Peak 2	None	None	None	None	None	None	None	None	None	None	None	None
H	Content	Unkn	Unkn	Unkn	Unkn	Unkn	Unkn	Unkn	Unkn	Unkn	Unkn	Unkn	Unkn
H	Sample
H	Peak 1	83.5	83.5	83.5	83.5	83.5	83.5	83.5	83.5	83.5	83.5	83.5	84
H	Peak 2	None	None	None	None	None	None	None	None	None	None	None	None

## Sheet: Melt Curve Peak Results
	Well	Fluor	Target	Content	Sample	Melt Temperature	Peak Height	Begin Temperature	End Temperature	Well Note
	A01	SYBR	16	Unkn	MeJA-0h	83.5	97.4002	79.5	88.5
	A02	SYBR	16	Unkn	MeJA-6h	83.5	87.1012	78.5	87
	A03	SYBR	16	Unkn	MeJA-12h	83.5	81.753	79.5	86.5
	A04	SYBR	16	Unkn	MeJA-24h	83.5	90.6832	78.5	87.5
	A05	SYBR	10	Unkn	PEG-0h	83	74.1781	78	87
	A06	SYBR	10	Unkn	PEG-24h	82.5	94.6865	75	88
	A07	SYBR	10	Unkn	PEG-48h	82.5	87.9791	76.5	87
	A08	SYBR	10	Unkn	PEG-72h	82.5	84.9187	75.5	88.5
	A09	SYBR	10	Unkn	NaCl-0h	83	79.7155	69.5	88
	A10	SYBR	10	Unkn	NaCl-24h	83	89.1299	78	89
	A11	SYBR	10	Unkn	NaCl-48h	83	91.4324	78	87
	A12	SYBR	10	Unkn	NaCl-72h	82.5	85.5211	76.5	87
	B01	SYBR	16	Unkn	MeJA-0h	83.5	86.2498	79	87
	B02	SYBR	16	Unkn	MeJA-6h	83.5	98.3105	79.5	87.5
	B03	SYBR	16	Unkn	MeJA-12h	83.5	91.6654	77	87
	B04	SYBR	16	Unkn	MeJA-24h	83.5	87.3733	78	87
	B05	SYBR	10	Unkn	PEG-0h	83	78.8094	78.5	88.5
	B06	SYBR	10	Unkn	PEG-24h	82.5	85.6162	75.5	90.5
	B07	SYBR	10	Unkn	PEG-48h	82.5	86.3258	75.5	87
	B08	SYBR	10	Unkn	PEG-72h	82.5	79.0327	76	87
	B09	SYBR	10	Unkn	NaCl-0h	83	82.2943	77.5	88
	B10	SYBR	10	Unkn	NaCl-24h	83	88.2714	72	87.5
	B11	SYBR	10	Unkn	NaCl-48h	83	86.4414	77.5	86.5
	B12	SYBR	10	Unkn	NaCl-72h	82.5	84.238	77.5	87.5
	C01	SYBR	16	Unkn	MeJA-0h	83	72.1443	78.5	88.5
	C02	SYBR	16	Unkn	MeJA-6h	83.5	117.106	79	87
	C03	SYBR	16	Unkn	MeJA-12h	83.5	107.316	78	87
	C04	SYBR	16	Unkn	MeJA-24h	83	91.8885	78.5	89.5
	C05	SYBR	10	Unkn	PEG-0h	83	86.7855	77.5	87
	C06	SYBR	10	Unkn	PEG-24h	82.5	91.6884	76	88
	C07	SYBR	10	Unkn	PEG-48h	82.5	100.07	76	87
	C08	SYBR	10	Unkn	PEG-72h	82.5	86.7418	77	87
	C09	SYBR	10	Unkn	NaCl-0h	83	98.0035	72	87
	C10	SYBR	10	Unkn	NaCl-24h	83	107.787	72.5	89.5
	C11	SYBR	10	Unkn	NaCl-48h	83	98.2484	72	87
	C12	SYBR	10	Unkn	NaCl-72h	82.5	103.886	77	88
	D01	SYBR	16	Unkn	MeJA-0h	83.5	103.111	79	89.5
	D02	SYBR	16	Unkn	MeJA-6h	83.5	110.694	79	88
	D03	SYBR	16	Unkn	MeJA-12h	83	95.4078	78.5	87
	D04	SYBR	16	Unkn	MeJA-24h	83	103.847	77	87
	D05	SYBR	10	Unkn	PEG-0h	83	83.512	71.5	88
	D06	SYBR	10	Unkn	PEG-24h	82.5	92.9207	76.5	88
	D07	SYBR	10	Unkn	PEG-48h	82.5	99.6984	75.5	89.5
	D08	SYBR	10	Unkn	PEG-72h	82.5	88.8055	75	88
	D09	SYBR	10	Unkn	NaCl-0h	83	90.1934	77.5	88
	D10	SYBR	10	Unkn	NaCl-24h	83	98.5705	76.5	88
	D11	SYBR	10	Unkn	NaCl-48h	83	84.4578	76	88.5
	D12	SYBR	10	Unkn	NaCl-72h	83	87.154	76	87
	E01	SYBR	G	Unkn	MeJA-0h	83.5	133.761	79.5	87
	E02	SYBR	G	Unkn	MeJA-6h	83.5	156.523	79.5	87
	E03	SYBR	G	Unkn	MeJA-12h	83.5	150.854	80	87
	E04	SYBR	G	Unkn	MeJA-24h	83.5	122.217	80	87
	E05	SYBR	G	Unkn	PEG-0h	83.5	141.109	80	87
	E06	SYBR	G	Unkn	PEG-24h	83.5	150.762	80.5	87
	E07	SYBR	G	Unkn	PEG-48h	83.5	148.418	79.5	87
	E08	SYBR	G	Unkn	PEG-72h	83.5	147.757	80	87
	E09	SYBR	G	Unkn	NaCl-0h	83.5	135.782	80.5	87
	E10	SYBR	G	Unkn	NaCl-24h	83.5	144.413	80.5	87
	E11	SYBR	G	Unkn	NaCl-48h	83.5	139.315	79	89
	E12	SYBR	G	Unkn	NaCl-72h	84	147.557	80	87
	F01	SYBR	G	Unkn	MeJA-0h	83.5	126.555	80	87
	F02	SYBR	G	Unkn	MeJA-6h	83.5	138.266	78.5	87
	F03	SYBR	G	Unkn	MeJA-12h	83.5	129.828	80	87
	F04	SYBR	G	Unkn	MeJA-24h	83.5	129.642	80	87
	F05	SYBR	G	Unkn	PEG-0h	83.5	125.305	80	87
	F06	SYBR	G	Unkn	PEG-24h	83.5	143.53	80	89.5
	F07	SYBR	G	Unkn	PEG-48h	83.5	133.025	79	89
	F08	SYBR	G	Unkn	PEG-72h	83.5	127.239	80.5	87
	F09	SYBR	G	Unkn	NaCl-0h	83.5	133.12	79.5	87
	F10	SYBR	G	Unkn	NaCl-24h	83.5	129.963	79.5	87.5
	F11	SYBR	G	Unkn	NaCl-48h	83.5	128.597	80	88
	F12	SYBR	G	Unkn	NaCl-72h	83.5	126.905	79.5	87
	G01	SYBR	G	Unkn	MeJA-0h	83.5	141.717	80	87
	G02	SYBR	G	Unkn	MeJA-6h	83.5	159.327	80.5	87
	G03	SYBR	G	Unkn	MeJA-12h	83.5	147.865	80.5	88
	G04	SYBR	G	Unkn	MeJA-24h	83.5	142.932	80	87
	G05	SYBR	G	Unkn	PEG-0h	83.5	141.909	79.5	87
	G06	SYBR	G	Unkn	PEG-24h	83.5	148.426	80	87
	G07	SYBR	G	Unkn	PEG-48h	83.5	140.762	80.5	87
	G08	SYBR	G	Unkn	PEG-72h	83.5	148.836	78	88
	G09	SYBR	G	Unkn	NaCl-0h	83.5	156.216	80	87.5
	G10	SYBR	G	Unkn	NaCl-24h	83.5	146.685	80	87.5
	G11	SYBR	G	Unkn	NaCl-48h	83.5	149.456	80	87
	G12	SYBR	G	Unkn	NaCl-72h	83.5	149.48	80	87
	H01	SYBR	G	Unkn	MeJA-0h	83.5	133.67	80	87
	H02	SYBR	G	Unkn	MeJA-6h	83.5	140.548	78	89
	H03	SYBR	G	Unkn	MeJA-12h	83.5	139.741	80	87
	H04	SYBR	G	Unkn	MeJA-24h	83.5	131.721	80.5	88
	H05	SYBR	G	Unkn	PEG-0h	83.5	135.025	80.5	87
	H06	SYBR	G	Unkn	PEG-24h	83.5	146.023	80	87
	H07	SYBR	G	Unkn	PEG-48h	83.5	140.041	80	87
	H08	SYBR	G	Unkn	PEG-72h	83.5	141.689	79	87
	H09	SYBR	G	Unkn	NaCl-0h	83.5	137.079	79	87
	H10	SYBR	G	Unkn	NaCl-24h	83.5	141.811	80	87
	H11	SYBR	G	Unkn	NaCl-48h	83.5	144.94	79.5	87
	H12	SYBR	G	Unkn	NaCl-72h	84	137.088	79	87

## Sheet: Melt Curve Derivative Results
	Temperature	A1	A2	A3	A4	A5	A6	A7	A8	A9	A10	A11	A12	B1	B2	B3	B4	B5	B6	B7	B8	B9	B10	B11	B12	C1	C2	C3	C4	C5	C6	C7	C8	C9	C10	C11	C12	D1	D2	D3	D4	D5	D6	D7	D8	D9	D10	D11	D12
	65	0.634117	-0.403342	0.557146	-0.471133	-0.357164	-4.05846	-2.53489	-2.60066	1.54179	1.0771	1.06514	-2.09709	-0.477154	0.223306	-0.257006	-0.569609	0.00160584	-3.14823	-2.99089	-2.54857	1.39403	0.763799	0.755734	-2.39918	-0.511122	0.811097	-0.0670407	-0.198165	0.708453	-3.21179	-3.98582	-2.35785	0.574067	1.65161	-0.175465	-2.16544	0.340868	-0.0459815	-0.961403	-1.12294	0.544538	-2.06918	-4.57882	-2.45439	0.242109	0.576613	-0.556314	-2.82465
	65.5	1.37392	-0.873908	1.20715	-1.02079	-0.773856	-8.79333	-5.49225	-5.63475	3.34054	2.33371	2.3078	-4.54369	-1.03383	0.48383	-0.556846	-1.23415	0.00347932	-6.82117	-6.48026	-5.52189	3.0204	1.6549	1.63742	-5.19822	-1.10743	1.75738	-0.145255	-0.429357	1.53498	-6.95888	-8.63593	-5.10867	1.24381	3.57849	-0.380174	-4.6918	0.738548	-0.0996266	-2.08304	-2.43304	1.17983	-4.48323	-9.92078	-5.31785	0.524569	1.24933	-1.20535	-6.12008
	66	1.26823	-0.806684	1.11429	-0.942267	-0.714328	-8.11692	-5.06977	-5.20131	3.08358	2.15419	2.13028	-4.19418	-0.954309	0.446612	-0.514012	-1.13922	0.00321168	-6.29647	-5.98178	-5.09713	2.78806	1.5276	1.51147	-4.79836	-1.02224	1.62219	-0.134081	-0.39633	1.41691	-6.42358	-7.97163	-4.7157	1.14813	3.30322	-0.350929	-4.33089	0.681737	-0.091963	-1.92281	-2.24588	1.08908	-4.13837	-9.15764	-4.90878	0.484217	1.15323	-1.11263	-5.64931
	66.5	1.26823	-0.806684	1.11429	-0.942267	-0.714328	-8.11692	-5.06977	-5.20131	3.08358	2.15419	2.13028	-4.19418	-0.954309	0.446612	-0.514012	-1.13922	0.00321168	-6.29647	-5.98178	-5.09713	2.78806	1.5276	1.51147	-4.79836	-1.02224	1.62219	-0.134081	-0.39633	1.41691	-6.42358	-7.97163	-4.7157	1.14813	3.30322	-0.350929	-4.33089	0.681737	-0.091963	-1.92281	-2.24588	1.08908	-4.13837	-9.15764	-4.90878	0.484217	1.15323	-1.11263	-5.64931
	67	1.26823	-0.806684	1.11429	-0.942267	-0.714328	-8.11692	-5.06977	-5.20131	3.08358	2.15419	2.13028	-4.19418	-0.954309	0.446612	-0.514012	-1.13922	0.00321168	-6.29647	-5.98178	-5.09713	2.78806	1.5276	1.51147	-4.79836	-1.02224	1.62219	-0.134081	-0.39633	1.41691	-6.42358	-7.97163	-4.7157	1.14813	3.30322	-0.350929	-4.33089	0.681737	-0.091963	-1.92281	-2.24588	1.08908	-4.13837	-9.15764	-4.90878	0.484217	1.15323	-1.11263	-5.64931
	67.5	1.3999	-0.723315	1.17987	-0.84479	-0.612989	-7.99666	-4.9112	-5.10856	3.11988	2.25791	2.27721	-4.03735	-0.865676	0.547699	-0.406539	-1.02105	0.0644962	-6.21023	-5.89798	-5.01736	2.9278	1.59589	1.69259	-4.62909	-0.884772	1.73422	-0.0309898	-0.30612	1.49853	-6.33199	-7.71067	-4.65925	1.2529	3.38862	-0.320073	-4.22159	0.837696	0.00324283	-1.85294	-2.15471	1.19462	-3.99758	-9.11547	-4.7745	0.615973	1.15963	-1.08054	-5.58584
	68	0.6342	-1.17661	0.831735	-1.38509	-1.19865	-8.87519	-5.93434	-5.68302	2.95014	1.57617	1.32814	-4.99106	-1.44506	-0.0779161	-1.1171	-1.71917	-0.269961	-6.70608	-6.32687	-5.41089	1.93013	1.17719	0.511892	-5.59778	-1.7735	1.12002	-0.617266	-0.837013	1.06052	-6.85987	-9.396	-5.08092	0.651303	2.85837	-0.44559	-4.91637	-0.123299	-0.619533	-2.26977	-2.68262	0.592774	-4.88785	-9.49331	-5.69982	-0.280172	1.17154	-1.27017	-5.95375
	68.5	-1.25871	-2.54601	-0.299955	-3.00115	-2.725	-9.47277	-7.69584	-6.92496	2.14835	0.636743	-0.210969	-7.07881	-2.22766	-1.26398	-2.08992	-3.33195	-1.29597	-8.05486	-8.00312	-7.0935	1.19578	0.318869	-1.36721	-8.29216	-3.23817	-0.730049	-2.15266	-2.08578	-0.370635	-8.38099	-12.2392	-5.37206	-0.885737	2.04025	-1.17964	-6.11678	-2.00776	-1.51166	-3.21211	-4.05566	-0.985302	-6.55426	-9.48428	-6.86817	-1.3924	0.825082	-1.70975	-6.93323
	69	-3.00525	-4.28884	-1.64428	-4.20898	-3.85926	-9.21714	-7.967	-7.003	1.30512	-0.15483	-0.782235	-8.07088	-3.2507	-2.2862	-2.70581	-4.86507	-2.30184	-8.95123	-9.24442	-8.45069	0.846995	-0.189808	-1.62781	-9.7357	-3.74845	-2.60221	-3.84089	-3.23682	-1.73152	-8.63704	-12.9552	-4.69999	-2.53925	0.0720227	-2.57538	-6.9145	-3.53972	-2.16733	-4.00186	-5.07585	-2.59936	-7.10246	-7.29747	-6.07412	-1.35851	-0.0227286	-2.32196	-7.43325
	69.5	-4.07443	-4.79041	-2.85005	-5.2989	-3.93373	-8.0582	-7.0199	-5.83512	0.977429	-1.34404	-2.04245	-8.11131	-4.43301	-3.70967	-3.63996	-6.10356	-2.99853	-8.16111	-8.57968	-8.23387	-0.714647	-0.989932	-2.60698	-9.26558	-3.46081	-3.72866	-5.26157	-4.23411	-2.05586	-7.11981	-11.7824	-3.39404	-3.16512	-2.82433	-3.37663	-7.257	-4.79136	-3.44732	-4.41531	-4.75499	-3.83609	-6.30988	-3.47804	-4.73762	-1.39893	-2.00603	-1.28043	-7.27537
	70	-4.56343	-4.76106	-3.75586	-5.97184	-3.46035	-4.51026	-4.39152	-3.1816	1.1708	-2.44719	-3.55803	-7.30316	-4.81271	-4.45609	-4.23204	-6.64337	-3.22282	-4.89577	-6.39402	-6.35763	-2.00921	-1.36546	-4.10908	-7.47259	-3.18963	-4.75517	-6.067	-4.72624	-2.80429	-3.96575	-8.60736	-1.09769	-3.32542	-4.44643	-3.39453	-6.44432	-5.74078	-4.47909	-4.4107	-3.83634	-4.19755	-3.99953	1.66693	-1.89276	-2.69203	-4.0819	0.793313	-6.13288
	70.5	-4.66641	-5.00148	-4.48506	-5.31553	-3.09684	1.05149	0.0702268	1.23572	1.6047	-3.05317	-4.35848	-4.72394	-4.58953	-4.17468	-4.37206	-5.68799	-3.35276	-0.00562096	-3.19765	-2.78426	-2.80696	-2.1836	-3.90461	-4.09726	-2.68334	-5.8937	-5.78201	-4.10641	-3.60488	0.783894	-2.63485	1.98234	-3.80834	-5.80652	-3.93496	-4.074	-5.60923	-4.47354	-3.85795	-2.24034	-3.55811	0.263876	7.90683	3.76324	-3.48905	-5.40003	1.4999	-3.99635
	71	-4.54159	-4.20737	-4.27437	-3.46076	-2.03561	6.86623	5.01019	6.60841	2.37709	-2.82784	-4.68592	-0.541568	-3.54892	-3.41174	-4.28626	-4.07702	-2.93089	5.25199	1.43257	2.19669	-3.51889	-2.89258	-2.88121	0.952375	-1.37829	-5.36598	-4.57777	-2.17849	-3.11927	6.24021	4.78737	5.67287	-3.24136	-6.62999	-3.63414	-0.262709	-3.76744	-3.32231	-2.07697	0.671529	-2.08854	5.72887	13.873	9.4035	-3.28217	-6.23443	2.3142	-0.502062
	71.5	-3.6606	-2.28188	-2.74322	-0.543732	0.199174	12.4983	9.36309	11.0433	3.43938	-2.2052	-4.23257	4.55753	-1.24769	-1.37756	-3.55147	-1.66897	-1.1948	10.4625	6.50801	7.69166	-3.3515	-2.15317	-2.0541	6.39557	0.694806	-3.47292	-2.24402	1.06944	-1.64846	11.7166	10.9919	9.55223	-1.96857	-5.79907	-1.86595	4.23884	-1.239	-1.49116	1.05866	3.9173	0.39483	10.9658	18.0612	13.477	-3.24945	-5.58003	4.39376	3.74957
	72	-1.81255	0.257931	0.0552139	3.05872	2.58595	17.3493	12.9876	14.5312	4.76059	-0.913335	-2.23708	9.18758	1.84243	1.75433	-1.30892	1.88763	1.43296	14.5338	10.6077	12.1588	-1.76197	-0.709057	0.380064	11.2427	3.17302	-1.18852	1.10614	4.68644	0.480947	15.8361	16.0632	13.3142	-0.154718	-3.28353	-0.0603011	9.03675	2.05305	1.21657	4.87467	7.31771	3.81867	15.3863	20.7916	17.0095	-2.10153	-2.7623	5.92155	7.93543
	72.5	0.602861	3.61504	3.29636	6.78809	5.06538	20.318	15.383	17.1092	6.21815	1.88789	0.665847	13.6276	5.06674	4.85257	2.04497	5.51002	4.30193	16.7462	13.6212	15.3093	0.880253	1.31056	3.97486	14.9312	6.01198	2.59346	5.30843	7.83448	3.64427	18.3055	19.5571	16.5616	2.34448	0.211628	2.72969	13.493	6.24063	5.43928	8.75745	11.147	7.42637	18.5397	22.2185	18.8498	1.06165	1.13335	6.93589	12.2039
	73	4.08536	7.4876	6.58616	10.0062	8.31669	21.5241	16.3195	17.9395	7.59239	5.23622	4.1196	17.0681	8.16904	7.96368	5.46346	8.64125	7.51957	17.5725	15.8573	17.1138	4.51382	4.46784	6.99371	17.3938	9.05235	7.50971	9.49056	10.8132	8.43909	19.4655	20.721	19.1325	5.65251	4.82232	6.66979	16.7621	9.62212	9.63288	12.439	14.3723	10.7643	20.3491	21.9636	18.7658	5.36788	4.7285	9.9084	15.4345
	73.5	8.00275	11.3104	9.59442	12.7865	11.5044	21.2595	17.1373	17.8771	9.30049	8.44277	7.82775	18.5516	10.2405	10.7912	8.48941	11.6629	11.0942	17.5982	17.006	17.5644	8.22535	8.1205	9.74464	19.0363	11.4402	11.4094	12.5553	13.4726	13.1063	20.1579	20.6684	20.0077	9.49494	9.11152	10.341	19.1749	11.5349	12.4238	15.5093	16.4398	13.6451	21.1899	21.0278	18.7983	9.41849	9.08204	12.6136	17.0047
	74	11.3019	14.0545	11.5468	14.945	13.908	20.5963	17.6987	17.7899	11.1969	11.6289	11.3303	18.7251	11.8902	12.573	11.7545	13.9343	13.9576	17.5115	17.3017	17.1118	11.6346	10.9799	12.518	19.3563	13.0083	14.6387	15.439	15.0322	16.7928	19.8848	20.5168	20.2182	13.0688	12.8655	13.8932	20.6039	13.5795	15.1256	17.4862	18.21	15.5864	21.3096	20.0854	18.8448	13.0921	13.3767	13.8799	17.9467
	74.5	13.6803	15.7479	12.0959	16.1053	15.7829	19.7492	17.8483	18.0063	12.8619	14.3501	13.9724	18.4697	13.1002	14.0763	13.8189	15.0689	15.9203	17.3387	17.3424	16.4995	14.587	13.4912	14.6256	18.7552	13.6908	17.4991	17.6815	15.7913	19.918	19.3572	20.1493	20.3864	15.5722	16.2656	16.81	21.5505	15.234	17.5983	18.7132	19.3695	16.5899	20.5883	19.5432	18.4982	16.2342	15.9089	15.3572	18.399
	75	15.6157	16.7314	12.7061	16.7265	17.1445	19.2219	17.8432	17.7566	14.1685	16.4974	15.7271	17.768	14.0289	15.3544	14.3118	15.9323	17.6412	17.0296	16.9256	16.3417	16.4407	15.6023	16.1783	18.2586	13.8667	18.9266	18.8366	16.496	21.7056	19.2752	19.8284	19.699	17.6849	18.1429	18.3687	21.5979	15.6008	18.5439	19.1639	19.2764	17.1847	19.8134	18.844	18.5326	18.3262	17.352	16.5648	17.6587
	75.5	16.7641	16.8593	13.5191	17.5928	17.4916	19.55	18.2277	17.7775	15.227	17.8277	17.0117	16.889	14.5844	15.8586	14.9136	16.3126	18.6171	17.0775	16.7654	16.4267	17.2027	17.0326	17.0625	17.6675	13.6561	19.5577	19.1173	17.1446	21.4105	19.1903	19.8289	18.4743	19.3327	18.4387	19.2425	21.087	16.5203	18.8665	19.3819	18.834	17.6131	19.2311	18.8288	18.8745	18.627	19.3091	16.0946	16.8061
	76	17.0356	16.1421	13.6934	17.7142	17.2772	20.6007	18.1892	18.4106	15.7898	17.864	17.956	16.5953	15.0341	16.2892	15.7768	15.9134	18.5011	17.466	16.9726	16.4228	17.4272	18.0335	17.7177	16.7391	13.4575	20.1151	19.5969	17.2942	20.5587	18.8239	19.9649	18.1971	19.809	18.8198	19.5386	20.9128	17.9728	19.3513	19.6024	18.9362	17.9586	18.7227	19.7492	19.0572	18.639	20.222	15.7975	16.9273
	76.5	17.3539	15.5412	14.0335	16.9464	16.9337	21.4565	18.014	19.2724	15.9619	17.6455	17.7491	16.6299	15.4054	16.9668	15.5155	15.1901	18.185	17.5975	17.6248	17.0641	17.2846	18.7065	18.6491	16.5195	13.3121	20.2811	19.4034	17.3434	19.9964	19.104	20.3725	18.3264	20.1281	19.452	19.3399	20.8435	18.459	19.4102	19.4163	19.0245	18.2441	18.7582	20.5594	19.2298	18.6172	19.7763	17.0024	17.0949
	77	17.6899	15.1117	14.8095	16.6404	16.3132	22.9795	18.5736	19.7099	15.9487	17.8561	17.3249	17.002	15.4878	17.2631	15.3059	14.8218	17.5612	18.1698	18.9591	18.3298	17.2655	18.8005	18.9013	16.77	12.9553	19.8522	18.9873	17.7717	19.1062	20.1741	21.4278	17.8903	20.6979	19.5034	19.5846	20.5456	18.4734	19.2561	19.1136	18.8068	18.5381	19.5474	21.5032	20.1233	18.262	20.0341	17.9255	17.0094
	77.5	17.2705	14.6267	14.5659	16.4055	15.5032	24.5596	19.6228	20.8617	16.2583	17.4561	17.4759	17.8211	15.1232	17.2946	16.1299	14.5132	16.6373	19.7197	20.949	19.3687	17.323	18.7541	18.453	16.468	12.8954	19.5453	18.8623	18.2331	18.8571	21.5986	22.8673	18.2011	20.8533	20.1227	19.7373	21.3779	18.7812	19.0237	18.8987	19.2949	18.9991	20.909	23.2164	21.7976	18.2974	20.5814	18.8337	17.9339
	78	16.4158	14.4059	13.8141	15.4713	15.502	25.2753	20.7752	22.689	16.9747	17.5466	17.4701	19.1423	15.0099	17.2586	16.34	14.1826	16.1569	21.8738	22.8928	20.4901	17.875	19.0636	18.8804	17.2785	12.7921	19.5896	18.877	17.8189	19.4723	23.2943	24.408	19.3109	21.0817	21.3052	20.0004	23.4574	18.4011	18.8339	18.4589	20.0024	19.152	22.6613	24.945	23.3507	19.8311	20.6229	21.0638	19.9424
	78.5	16.3532	14.4792	14.0087	15.3735	16.2145	26.3433	22.862	24.3092	17.9129	18.9287	17.7956	21.3435	15.2214	17.1773	16.0371	14.6083	16.2335	24.4084	25.235	22.653	19.4709	20.1166	19.6521	19.4716	12.6861	19.722	19.0396	17.345	20.5061	25.3613	26.4065	20.7943	21.7241	22.2712	21.0243	25.4055	17.7415	18.8201	18.1502	20.0462	19.0359	24.8324	26.5794	25.2409	22.1334	21.0813	23.2617	21.6155
	79	16.1363	15.1264	13.8021	16.0784	16.8461	28.9504	26.3826	26.2748	19.5848	20.5877	19.2077	24.5773	14.8345	17.1044	16.4143	15.8564	16.7475	27.4281	27.6477	25.1226	21.3312	21.8485	19.6866	21.666	13.1206	19.7231	19.537	17.5258	21.8457	28.4828	29.1411	22.825	22.44	23.0575	22.3151	28.4552	17.7191	18.9082	18.367	20.1585	20.2399	27.7906	29.7011	28.5933	24.9939	22.676	24.3738	23.7322
	79.5	15.8224	16.1261	13.7602	16.9854	18.6786	32.0078	30.1249	29.2416	22.5388	22.872	21.841	28.5985	15.3279	17.0803	17.2711	16.9534	18.6714	31.3826	30.1844	28.2254	23.5199	25.0976	21.2265	24.9776	14.0673	20.4535	20.3339	17.802	24.1922	32.3197	32.3575	26.5692	24.689	25.0684	24.2531	32.8611	18.2147	19.3868	18.9671	20.973	22.7427	31.9643	33.86	32.5378	28.7516	24.473	26.0807	27.8976
	80	16.9526	17.5409	15.4301	18.8383	22.3903	36.8483	35.1817	33.7884	25.99	26.5131	25.4115	34.0218	16.8526	18.1234	18.2384	18.4729	21.7332	36.1546	34.5757	33.1637	27.46	30.3562	25.1945	30.8104	15.097	22.3443	21.7266	18.7782	27.7763	37.488	37.4956	32.1941	29.2385	29.1179	27.8204	38.1516	19.7621	21.0472	21.1042	22.3801	25.768	37.4228	39.3477	37.3242	33.288	27.8599	29.2234	33.2673
	80.5	20.2715	20.7871	18.3589	22.5081	27.5948	46.3044	43.8074	41.1141	31.0135	32.2772	31.6203	42.6477	19.5932	21.7687	21.1878	21.856	26.5747	43.2076	42.4931	40.9802	33.9363	38.003	31.4427	39.0437	18.0407	26.0841	25.8696	22.889	33.7648	46.3449	47.4942	41.4674	36.4604	36.9519	34.0793	47.043	23.4501	25.1842	25.2804	26.03	31.4912	46.2954	49.0213	46.0802	39.2791	34.4355	34.2269	40.8676
	81	28.305	29.2127	24.5121	30.2815	35.6749	59.67	56.1822	52.6096	40.251	42.544	41.9733	54.6489	27.3832	30.5663	29.2173	29.7281	35.7135	54.5714	54.2896	52.2982	43.606	49.0578	41.8415	50.3245	26.1666	36.6008	35.7701	33.0476	43.9282	59.752	62.2535	54.4313	48.9691	50.774	45.432	61.5664	32.6429	35.341	34.3697	36.0234	41.8346	59.6897	63.34	58.5527	48.9582	45.839	43.9312	53.2092
	81.5	43.8933	43.5778	37.2448	44.4604	47.9175	74.2342	69.3094	66.2534	52.7057	57.1915	56.4083	67.5662	42.29	46.2223	43.8671	43.7167	48.5479	67.5959	67.8003	64.596	57.0542	63.1546	56.9222	63.9551	38.5802	56.107	52.8229	48.7252	57.7455	73.7618	77.9754	67.878	66.0441	70.0608	61.3971	78.2267	48.9365	53.4527	50.349	53.3463	54.9192	74.0719	78.6945	71.1948	62.476	61.865	57.5927	67.6046
	82	63.4924	60.4195	52.967	61.4788	60.4341	86.9467	80.7651	78.0238	64.7478	71.795	71.4653	78.786	59.2694	65.6003	61.4297	60.333	61.3783	78.3597	79.4429	74.0172	70.2665	76.6337	71.5781	76.3813	52.0183	78.9864	73.5379	66.0821	71.7577	85.0365	91.6799	79.4818	82.0435	89.0508	77.7055	93.3827	68.4983	74.8856	68.5757	73.4101	67.7005	85.8191	91.7482	81.8672	75.8776	78.8209	70.7974	79.4569
	82.5	81.5555	75.9163	67.2346	77.1725	69.5722	94.6865	87.9791	84.9187	74.7528	83.4292	84.5639	85.5211	74.5559	83.6493	77.6859	75.3922	72.4395	85.6162	86.3258	79.0327	79.2709	85.8109	82.0578	84.238	64.1892	99.9334	92.8527	81.7987	82.335	91.6884	100.07	86.7418	93.5855	102.554	91.3886	103.886	86.6347	94.7966	84.164	91.5271	78.4835	92.9207	99.6984	88.8055	86.0625	92.2219	80.9498	87.1808
	83	95.0869	87.0496	78.6623	89.0815	74.1781	93.3965	86.4438	84.4187	79.7155	89.1299	91.4324	83.9982	86.0302	96.7134	89.9944	86.4581	78.8094	84.9047	84.5632	76.9127	82.2943	88.2714	86.4414	83.3372	72.1443	115.701	106.346	91.8885	86.7855	89.4954	97.337	84.5253	98.0035	107.787	98.2484	103.773	100.708	109.328	95.4078	103.847	83.512	90.8649	97.1009	86.5961	90.1934	98.5705	84.4578	87.154
	83.5	97.4002	87.1012	81.753	90.6832	70.818	80.9973	73.8076	73.8815	74.9327	84.0639	87.3557	72.2895	86.2498	98.3105	91.6654	87.3733	75.2099	73.3034	72.0707	64.5446	76.323	80.9172	80.5852	72.1444	69.6157	117.106	107.316	89.038	81.2303	75.9515	82.6645	72.469	90.2446	100.017	93.0402	90.5352	103.111	110.694	95.2251	103.399	78.7171	77.3134	82.3785	73.7135	83.5701	93.6321	77.243	76.108
	84	84.1035	73.6903	71.9715	78.2331	58.2325	61.4214	55.0944	56.5481	61.4218	68.4134	72.8569	54.683	72.5721	84.9107	78.7586	74.3865	62.4932	56.1623	53.9624	47.1352	60.9331	64.4094	64.3976	54.753	56.4885	99.9218	92.4623	73.1138	65.6584	56.2775	62.1991	56.1666	71.6411	79.4113	76.663	69.1285	89.5365	95.1654	80.229	87.5929	64.5835	57.4431	61.1356	56.1149	66.9289	76.6773	61.3449	58.1149
	84.5	62.608	53.7435	54.4972	58.3131	41.9661	41.7579	36.2881	38.9327	44.4296	49.1674	53.1733	36.6833	52.9551	63.2129	58.7371	54.6728	45.9598	38.7783	36.1739	31.0293	42.3357	45.0247	44.9208	36.2821	40.1439	73.9941	68.5658	52.4569	45.9573	37.3048	41.2783	38.4121	50.0468	54.8575	55.488	45.9137	67.3171	70.8228	58.7695	63.9134	46.5684	37.7079	39.7587	38.3385	47.072	54.8257	43.0462	39.1416
	85	41.1566	34.0873	35.8715	38.0326	26.7541	24.8582	19.6181	23.9148	27.8695	31.0355	33.1496	20.8658	33.6947	41.0159	38.4379	35.2313	28.9731	22.5793	20.1474	16.9534	26.1903	27.3354	27.2892	20.0345	24.7899	47.848	44.0498	32.194	27.9934	21.2352	22.7183	21.8555	30.0554	33.3228	34.1897	25.6769	44.2476	45.8667	37.8158	40.3134	29.1802	20.9459	21.5888	21.7379	28.6638	34.4564	25.7696	22.0744
	85.5	21.7556	16.8254	18.9117	19.6288	13.88	12.1704	7.83826	12.507	14.4369	15.882	16.3299	9.30655	16.6775	21.2651	19.6607	18.0279	14.8261	11.1443	8.59619	6.70818	12.9855	13.1938	12.8416	8.95826	12.0065	24.3376	22.8888	14.9741	13.7808	9.45006	10.3541	10.687	14.1384	16.3566	17.102	11.7823	23.2637	23.9868	19.3878	20.7868	15.0032	9.09072	9.23297	9.99727	14.0197	17.9304	12.7699	10.0087
	86	8.25308	5.61771	6.50311	6.99587	5.60855	5.48267	3.04806	6.34867	6.08503	6.45015	5.58557	3.46717	5.91495	7.5976	6.73761	5.72742	6.27603	5.7853	3.79528	2.62213	4.15577	4.77309	3.85802	3.62273	4.25595	8.65773	8.26191	4.91545	4.7396	3.7355	4.21834	4.70177	4.74353	6.00528	6.67881	4.67427	8.55883	9.06714	7.14436	7.4727	5.88522	3.33091	3.69997	4.68179	5.45891	7.06288	5.679	4.17856
	86.5	3.05358	1.3846	0.655236	2.01988	2.39374	3.39665	1.75476	3.71013	2.06983	3.11902	0.909763	1.7002	2.27572	2.1232	1.70126	0.681371	2.21425	3.57453	2.29633	1.61815	0.706913	2.16136	1.49377	1.72179	2.12618	2.83147	2.03983	1.82365	1.23265	2.24907	1.99227	1.58436	1.59579	2.5798	1.871	2.10294	2.71397	2.41224	2.20274	1.34866	2.2743	1.95687	2.28829	2.38598	2.22977	2.41817	3.11744	2.22503
	87	1.42451	0.588938	-0.411985	1.0199	1.69773	2.23978	1.26016	2.11174	0.696186	2.20764	0.444802	1.27009	1.46263	1.22556	0.179477	0.0725295	0.983003	2.46546	1.30418	0.768895	0.687257	1.51813	1.59979	1.13067	2.08844	1.71679	1.03021	1.41542	1.00596	1.62243	1.74196	0.593357	1.08369	2.38963	0.662349	1.63058	1.63943	0.701866	1.14114	0.580526	1.99723	1.72228	2.04775	1.14799	1.46952	1.51715	2.3481	1.94656
	87.5	0.265699	0.461399	0.377644	0.72273	1.69067	0.843304	1.47094	1.23181	0.33531	1.76377	0.770419	1.20594	1.45302	1.00805	-0.46864	0.13641	1.01401	2.17216	1.35743	0.713601	0.58657	1.18032	1.29441	0.74483	1.74882	1.59976	1.26977	1.36535	1.16189	0.734505	1.76771	0.611555	0.998663	2.0796	1.23657	1.21047	1.67774	0.46213	1.36894	1.18612	1.91903	1.03943	1.52599	0.592154	1.51409	1.15703	2.24303	2.02189
	88	0.214606	0.489862	0.911024	0.883555	1.63023	-0.11108	1.42796	0.534376	-0.222528	1.56386	0.926775	1.49898	1.54546	0.919138	-0.269232	0.260261	0.660851	2.00568	1.9244	1.06383	0.416455	1.63204	1.28186	0.602816	1.14839	1.7038	1.10886	1.3248	0.697266	0.44329	1.58658	0.764489	1.15972	1.45972	1.34419	0.815461	1.64935	-0.128116	1.29576	0.808951	1.71062	0.412194	0.924794	0.427163	1.25809	0.48824	1.94482	1.35166
	88.5	0.0126725	0.760762	1.09454	0.986933	1.62725	0.415005	0.849803	0.0178259	-0.460508	1.31236	1.62179	1.96529	1.35279	1.29351	0.050779	1.02482	0.372224	1.69296	1.58986	0.693892	1.152	1.91929	1.64877	1.2438	0.784298	1.48292	1.06933	0.903619	0.365648	0.842712	2.06796	1.33583	1.79346	1.19724	1.03775	0.900279	1.47645	-0.563985	0.598087	1.06508	2.01971	0.346539	0.819733	0.627539	1.23402	0.5594	1.34538	0.282297
	89	-0.356757	1.09013	1.36842	0.61193	1.97461	1.24455	1.13751	0.74418	0.200973	1.07609	2.14459	1.90838	0.964301	1.4093	0.230525	1.71219	0.787438	1.40378	1.64918	0.426877	1.74528	1.727	0.833353	1.51592	0.796304	1.07222	1.39632	0.31317	0.750525	1.2461	2.00783	1.8038	1.83298	0.82906	1.49618	1.29049	0.936423	0.00145453	0.73062	2.11153	1.849	0.732581	0.653804	0.765706	1.51121	1.21467	1.2637	-0.202301
	89.5	0.402256	1.23728	1.22779	0.253228	2.00537	1.43585	1.62997	1.68274	0.928872	0.951386	1.42601	1.50942	1.08502	1.18973	0.454197	1.58248	0.985633	1.2146	1.93854	0.911051	1.38792	1.70904	0.20063	1.35965	0.850457	0.791487	1.60056	-0.0202312	1.02487	1.31705	0.845487	1.80447	1.55494	0.503317	1.73688	1.40923	0.617106	0.515925	1.27319	2.05288	1.1771	0.987442	0.287783	0.89274	1.87051	1.43925	1.55791	-0.304421
	90	1.09432	1.40645	0.523143	0.385828	1.87281	2.08454	1.70074	1.35594	0.99596	0.874069	0.890744	1.73919	0.994008	1.18105	0.891842	1.42452	0.835438	1.14079	1.63515	1.04141	1.16759	1.99114	0.914309	1.54948	0.93282	0.914762	1.445	0.104135	0.520904	1.39437	0.373799	2.00905	1.99111	0.775944	1.3289	1.00375	0.536284	0.642228	0.935518	1.57962	1.08318	0.981136	0.465295	1.36661	1.48787	1.3639	1.65614	-0.0112215
	90.5	1.04634	1.9298	0.330482	0.907145	1.86379	2.94382	1.9913	1.36169	1.24059	1.11994	1.65669	1.75743	0.749736	1.48286	1.51459	0.982162	1.01701	0.80894	1.25552	0.662996	1.46319	1.88928	1.69456	1.54375	1.09296	1.12392	1.38364	0.235701	0.49908	1.56634	0.274297	2.10418	1.92802	1.05699	1.20261	0.543224	0.754494	1.11187	0.942506	1.34074	1.10884	1.55534	0.894951	1.39364	1.26035	1.55386	1.60787	0.620736
	91	1.41438	1.70081	0.774264	1.18193	1.68762	2.54027	2.16865	1.80309	1.60735	1.32701	1.77549	1.4884	0.74706	1.47962	1.6628	0.380945	1.1096	0.692555	1.26516	0.955476	0.812541	1.66627	2.13228	0.795983	1.2871	1.0364	1.16836	0.380258	1.18854	1.40074	-0.172475	1.79273	1.23976	1.17388	1.4774	0.0497836	1.08313	1.69643	1.8256	0.733403	0.598403	1.84613	0.745417	1.04362	1.45021	1.17455	1.62792	1.20359
	91.5	1.55049	1.37534	1.10695	1.18013	0.825328	1.30142	1.89447	1.26743	1.55031	0.943118	0.956466	1.51865	1.39036	1.35995	1.64953	0.159424	0.865375	0.993872	1.00402	1.44856	0.540119	1.28029	2.39552	0.519842	0.959692	1.06666	0.628433	1.13257	0.926687	0.779744	0.314879	1.55232	1.11931	1.69441	1.57705	-0.340606	1.02903	1.72466	2.2069	0.0790404	0.473384	1.08916	0.954382	1.23559	1.36437	0.877545	1.24091	1.54245
	92	0.956113	1.67943	1.10338	1.80894	0.0548686	1.25881	1.39349	0.39675	1.23651	0.687295	0.83209	1.29719	1.89063	1.33505	1.93643	0.339705	0.526485	1.22997	0.730571	1.42888	1.25931	0.923189	2.42517	0.552436	0.819215	1.49603	0.144455	1.67825	0.448443	0.319918	1.30995	1.5065	1.18961	2.24027	1.46823	-0.11683	0.895041	1.56179	1.42965	0.0313842	0.580546	0.4457	1.25826	1.1848	0.609483	0.810315	0.75445	1.54534
	92.5	0.636839	2.01626	1.19977	1.98539	-0.172281	1.50937	1.19147	0.562951	1.51396	0.585256	1.16926	0.563363	1.77611	1.16354	1.95433	0.898783	0.667592	1.23706	0.994629	1.38033	1.45903	0.662955	1.75573	0.533554	1.06034	1.3147	0.178975	1.39509	1.30912	0.686336	1.88756	1.35739	0.702817	1.85996	1.44301	0.678236	0.843922	1.28306	0.894666	-0.128514	0.49056	0.918959	1.16303	0.98856	0.889279	0.642893	0.606383	1.3117
	93	0.584371	1.32932	1.02252	1.17356	-0.65006	1.32005	1.03634	0.624091	2.04329	0.0529076	0.270589	0.0262617	1.93845	0.632032	1.39249	1.64927	0.765337	1.61374	1.09007	1.61426	1.87485	0.00300469	0.367437	0.536935	1.19846	1.04397	0.730888	1.48719	1.72889	0.502819	2.19483	0.784118	0.549921	1.4293	1.29754	1.28581	0.359469	0.805108	0.330426	-0.060434	0.586799	1.20457	1.19464	1.30248	0.648438	1.0479	0.728677	1.07101
	93.5	0.761616	1.60695	0.872642	0.840773	-0.918906	0.687063	1.03639	-0.206647	2.65951	-0.261532	0.218543	0.169722	1.34639	0.0584204	1.20363	2.32658	0.709458	1.75715	1.47545	1.47295	1.82209	-0.442307	-0.104803	1.42449	0.819924	0.961088	1.67809	1.6147	2.1202	1.09789	2.93195	1.14678	0.987602	0.288629	1.0059	1.13226	0.115865	-0.378431	-0.0597577	0.432104	0.943995	1.6997	2.0049	1.71725	0.923029	1.71767	0.983364	1.40803
	94	0.836386	2.03022	0.757429	0.824906	-0.709121	1.08245	1.0663	-0.236923	3.1629	-0.0891245	0.890426	-0.00955291	0.735699	-0.245957	1.18941	2.89133	0.99307	1.63694	1.76386	1.24857	1.71634	-0.417761	-0.268571	2.04596	0.996663	0.693375	2.26801	1.0953	2.95999	1.90505	3.18311	1.38031	0.963431	-0.695805	0.791179	1.39439	0.293403	-1.14024	-0.569598	0.549356	1.35011	2.71595	2.25578	1.74599	1.52367	1.92542	1.33962	1.49323
	94.5	2.07972	3.32761	1.63922	0.784421	-0.202385	-0.576021	1.47889	-1.15611	4.81544	0.220452	2.38749	1.10473	-0.96091	-0.530493	1.36356	3.71621	1.38981	1.56184	2.8633	0.820093	-0.739551	-0.361883	0.865125	4.13823	-0.0929434	-0.14288	3.75159	0.706267	4.93453	4.41573	4.43526	2.90924	1.67148	-3.58013	0.865679	0.0373267	0.941602	-2.75817	0.449049	1.03002	1.84253	4.29419	3.95106	2.55168	4.48738	2.38268	1.95245	2.35211
	95	1.51132	2.25595	1.2941	0.387122	0.0507639	-1.42465	0.755312	-1.12081	2.88023	0.316842	1.75996	1.13276	-1.10767	-0.27431	0.77687	1.88385	0.727333	0.609671	1.74161	0.0881682	-1.70266	-0.118167	1.20403	2.90362	-0.83421	-0.487572	2.2489	0.22008	2.92518	3.12368	2.71992	2.15372	1.15556	-2.95638	0.503399	-0.847848	0.750177	-1.98238	0.895889	0.73063	1.05692	2.45416	2.72277	1.54204	3.58166	1.30636	1.05635	1.46485
[truncated: 48 more columns]

## Sheet: Run Information
File Name	MeJA SAUR16 and PEG NaCl SAUR10.pcrd
Created By User	admin
Notes
ID
Run Started	08/09/2025 07:57:48 UTC
Run Ended	08/09/2025 09:04:34 UTC
Sample Vol	10
Lid Temp	105
Protocol File Name	Mei5Bio-2step.prcl
Plate Setup File Name	MeJA SAUR16 and PEG NaCl SAUR10.pltd
Base Serial Number	CT022697
Optical Head Serial Number	785BR15045
CFX Maestro Version	5.2.008.0222.
