# Supplementary material for: Genome-wide identification of SMALL AUXIN UP RNA (SAUR) gene family and its expression profiles in response to abiotic stress and auxin in tea plants ( Camellia sinensis )
Source: PeerJ journal article supplement (doi:10.7717/peerj.20681), 2026-01-30
Supplement: MeJA_SAUR82_and_PEG_SAUR7_16_73.xlsx [file MeJA_SAUR82_and_PEG_SAUR7_16_73.xlsx]

## Sheet: Melt Curve Derivative Results
	Temperature	A1	A2	A3	A4	A5	A6	A7	A8	A9	A10	A11	A12	B1	B2	B3	B4	B5	B6	B7	B8	B9	B10	B11	B12	C1	C2	C3	C4	C5	C6	C7	C8	C9	C10	C11	C12	D1	D2	D3	D4	D5	D6	D7	D8	D9	D10	D11	D12
	65	0.432075	0.625172	0.0211948	-0.0528777	0.229239	-1.19917	0.927813	-0.721164	-0.205684	0.353452	1.5391	1.08197	-0.08213	0.117328	0.869236	-0.202225	-0.24936	-0.18025	-0.103989	0.13434	1.01887	1.01922	1.00404	0.933268	-0.0872371	0.990073	1.86914	0.697919	0.941921	-0.655419	1.54596	-0.244774	0.72778	1.88562	1.71911	1.43634	-0.88277	0.844092	0.246504	0.322583	0.664687	-0.273296	0.674696	-0.121526	0.64324	0.304108	1.93742	0.814411
	65.5	0.936163	1.35454	0.045922	-0.114568	0.496684	-2.5982	2.01026	-1.56252	-0.445649	0.765814	3.33472	2.34427	-0.177948	0.254211	1.88334	-0.438153	-0.54028	-0.390542	-0.22531	0.29107	2.20756	2.20832	2.17542	2.02208	-0.189014	2.14516	4.04981	1.51216	2.04083	-1.42007	3.34958	-0.530345	1.57686	4.0855	3.72474	3.11208	-1.91267	1.82887	0.534092	0.698929	1.44015	-0.592141	1.46184	-0.263306	1.39369	0.658902	4.19774	1.76456
	66	0.86415	1.25034	0.0423895	-0.105755	0.458478	-2.39833	1.85563	-1.44233	-0.411369	0.706905	3.07821	2.16395	-0.16426	0.234656	1.73847	-0.404449	-0.49872	-0.360501	-0.207978	0.26868	2.03775	2.03845	2.00808	1.86654	-0.174474	1.98015	3.73828	1.39584	1.88384	-1.31084	3.09192	-0.489549	1.45556	3.77123	3.43822	2.87269	-1.76554	1.68818	0.493008	0.645165	1.32937	-0.546591	1.34939	-0.243051	1.28648	0.608217	3.87484	1.62882
	66.5	0.86415	1.25034	0.0423895	-0.105755	0.458478	-2.39833	1.85563	-1.44233	-0.411369	0.706905	3.07821	2.16395	-0.16426	0.234656	1.73847	-0.404449	-0.49872	-0.360501	-0.207978	0.26868	2.03775	2.03845	2.00808	1.86654	-0.174474	1.98015	3.73828	1.39584	1.88384	-1.31084	3.09192	-0.489549	1.45556	3.77123	3.43822	2.87269	-1.76554	1.68818	0.493008	0.645165	1.32937	-0.546591	1.34939	-0.243051	1.28648	0.608217	3.87484	1.62882
	67	0.86415	1.25034	0.0423895	-0.105755	0.458478	-2.39833	1.85563	-1.44233	-0.411369	0.706905	3.07821	2.16395	-0.16426	0.234656	1.73847	-0.404449	-0.49872	-0.360501	-0.207978	0.26868	2.03775	2.03845	2.00808	1.86654	-0.174474	1.98015	3.73828	1.39584	1.88384	-1.31084	3.09192	-0.489549	1.45556	3.77123	3.43822	2.87269	-1.76554	1.68818	0.493008	0.645165	1.32937	-0.546591	1.34939	-0.243051	1.28648	0.608217	3.87484	1.62882
	67.5	0.753108	1.32602	0.0751952	-0.0243878	0.540379	-2.33608	1.8902	-1.31984	-0.429235	0.69221	3.18116	2.21121	-0.0484327	0.39089	1.77978	-0.403816	-0.437167	-0.251	-0.143692	0.309287	2.16926	2.1115	2.07928	1.86717	-0.110376	2.12779	3.82333	1.49509	1.91227	-1.18178	3.16261	-0.407917	1.49276	3.8853	3.58175	2.94046	-1.63841	1.88605	0.561929	0.745472	1.46203	-0.447603	1.39114	-0.126273	1.36207	0.606396	3.95779	1.73807
	68	1.41321	0.948237	-0.0309269	-0.603159	0.00687073	-2.6211	1.74216	-2.14332	-0.287427	0.863113	2.57158	1.90678	-0.845635	-0.650661	1.58548	-0.321012	-0.847249	-0.957007	-0.568963	0.0932395	1.35362	1.65854	1.66257	1.94848	-0.425729	1.20728	3.37801	0.888066	1.82823	-1.98105	2.71975	-0.822077	1.38332	3.17622	2.70558	2.62164	-2.40831	0.547699	0.189417	0.108991	0.59367	-1.00167	1.14739	-0.870338	1.00695	0.717596	3.48687	1.06898
	68.5	2.83293	-0.549821	-0.985529	-1.02267	-0.755943	-4.04652	0.946679	-3.18265	-0.181625	0.53453	1.10724	1.51566	-1.71585	-2.08723	0.705508	-0.851314	-1.41142	-2.021	-1.14684	-0.690972	-0.197614	0.912177	0.694698	1.39649	-1.7024	-0.441923	1.83042	-0.327686	0.853142	-3.49762	1.93012	-2.37479	0.141654	1.84058	0.908526	1.21977	-4.04498	-0.994644	-1.02064	-0.951444	-0.58822	-2.55684	0.547712	-2.10185	-0.635966	0.171083	2.25348	-0.236111
	69	4.68951	-2.12794	-2.70002	-1.40437	-1.48344	-5.46043	-0.295836	-3.58583	-0.972531	-0.227838	0.288784	0.518018	-1.89654	-2.37748	-0.330434	-2.02185	-1.55312	-3.16848	-1.56373	-0.929914	-1.46043	-0.629775	-0.517234	0.470856	-3.19821	-2.10489	0.370719	-1.3992	-0.072868	-4.81849	1.24257	-4.16345	-1.30793	0.891435	-0.446994	-0.86117	-5.3825	-2.18757	-1.90689	-1.95509	-2.02896	-4.09968	0.0479762	-3.02181	-2.4119	-1.37409	0.959482	-1.62008
	69.5	6.42121	-3.09331	-4.16961	-2.45827	-2.71948	-6.1037	-1.64505	-4.62317	-1.7691	-0.657044	-0.338705	-0.34253	-2.3773	-2.87456	-1.45312	-2.65128	-1.74998	-4.23807	-1.90422	-1.00103	-2.4505	-1.78384	-1.0442	-0.00814188	-4.45363	-4.53697	-1.44475	-2.53859	-0.515552	-6.1028	0.227826	-5.24653	-2.24546	-0.80871	-2.04323	-2.24799	-6.15067	-4.15498	-2.79072	-2.96988	-3.3191	-5.37418	-0.259606	-4.77392	-3.60224	-2.44645	-1.08756	-2.96021
	70	7.43836	-4.07941	-4.94871	-3.31162	-3.26225	-5.91159	-2.80344	-5.47385	-2.34145	-1.63704	-1.95479	-0.77939	-3.33505	-3.94732	-1.95663	-3.4539	-2.36669	-5.05715	-1.95785	-1.33542	-3.55339	-2.11188	-2.02427	-0.895184	-5.89127	-6.69527	-3.00492	-3.86724	-0.712732	-7.00604	-0.622877	-6.01512	-3.68856	-2.85377	-3.55265	-3.21249	-6.08887	-5.2845	-3.90699	-3.9158	-3.4489	-6.16896	-0.530255	-6.56811	-4.48299	-3.54358	-2.76145	-3.61083
	70.5	8.4045	-4.61835	-5.88638	-3.53413	-3.14019	-5.74181	-3.23353	-5.4265	-3.61024	-2.78331	-2.96537	-0.924219	-4.03334	-4.77751	-1.87776	-4.84401	-2.71185	-5.85181	-2.33632	-0.469947	-4.26407	-2.85715	-3.33416	-1.93455	-7.5366	-7.70088	-3.19653	-4.65474	-0.746453	-7.07632	-1.15586	-7.08148	-5.09156	-3.68166	-4.15377	-4.3828	-5.37317	-5.33859	-4.08446	-4.47301	-3.44806	-6.8758	-0.748679	-6.88762	-4.91969	-4.68163	-3.17176	-3.69462
	71	9.26708	-4.05734	-6.25571	-4.01654	-3.16391	-4.81857	-3.52678	-5.04393	-4.09803	-3.12884	-3.02158	-1.2715	-4.07779	-5.01215	-1.62116	-5.55945	-2.76101	-6.07734	-3.26684	1.62604	-4.24671	-3.64769	-3.40993	-2.11552	-8.16334	-7.59107	-2.52406	-4.18395	-0.417916	-6.53602	-1.6408	-6.90388	-5.04717	-4.0631	-4.80539	-4.81641	-3.82085	-5.05282	-3.63456	-4.61501	-3.37943	-6.68157	-1.1842	-5.65438	-3.91142	-4.9332	-3.32231	-3.83242
	71.5	9.69239	-2.86274	-4.76734	-4.21351	-2.61425	-1.99265	-3.59856	-3.68907	-3.36054	-2.67176	-3.6227	-1.99984	-3.71677	-4.87841	-0.494269	-5.15269	-2.17862	-4.85768	-4.35797	3.45769	-3.92003	-3.4665	-2.77319	-1.8839	-7.23523	-6.20173	-1.20329	-3.20454	0.973074	-5.45286	-2.01874	-4.82054	-3.98172	-4.25895	-5.63267	-4.75365	-1.82345	-4.13411	-2.92394	-3.4901	-1.96759	-5.10802	-1.41788	-3.57295	-2.16814	-3.92658	-2.76007	-3.55101
	72	9.73567	-0.135485	-2.66666	-3.10316	-1.09274	1.48998	-3.01255	-0.669714	-2.28435	-2.03806	-3.53916	-1.72275	-2.24976	-4.15561	1.17093	-4.13223	-0.829869	-3.05184	-4.82995	5.24154	-3.04739	-3.38525	-2.44439	-1.97027	-5.19393	-3.60849	0.883729	-1.43472	2.49218	-2.55322	-1.61636	-2.3412	-2.90275	-3.17636	-5.11788	-4.28236	0.693027	-1.81012	-1.0445	-1.54745	0.0414446	-3.12743	-1.25098	-0.0771597	-0.323518	-2.09432	-1.40512	-2.29426
	72.5	10.1975	3.43418	-0.419864	-1.09409	1.10457	4.6757	-1.67795	2.75479	-0.0798689	-0.885532	-1.59097	-0.575536	-0.0344591	-2.35819	2.92749	-2.38604	1.12083	-0.716461	-4.95558	7.38429	-1.12376	-2.82659	-1.19714	-1.76055	-1.21075	-0.178896	3.41779	1.12194	3.96627	1.47969	-0.404209	0.797582	-0.445139	-1.35376	-2.91681	-2.91863	3.78994	1.1037	1.64439	0.199105	1.44893	-0.404374	-0.712499	4.70638	2.44677	-0.0451405	0.394501	-0.661091
	73	10.4438	6.58583	2.97826	0.87754	3.71703	7.85735	-0.178016	6.14206	3.31801	1.0408	0.3914	1.23918	2.58904	0.564222	5.54642	0.502153	3.62549	2.88939	-4.36001	8.58557	1.86802	-0.887953	1.32261	-0.306454	3.7807	3.61069	5.83163	4.31504	6.00955	5.11236	1.21558	5.19195	2.60737	0.760895	-0.273025	-0.315683	6.59364	4.61496	4.42308	3.15472	3.77413	3.58211	0.491394	8.87432	5.60468	2.52884	2.77569	1.78579
	73.5	10.8164	9.81999	6.55815	3.58067	6.89539	11.1064	2.04932	9.33216	6.14108	3.31001	2.60294	3.88761	5.48462	3.58081	8.51327	3.85585	6.49634	6.46466	-2.35671	9.25501	5.0841	1.19923	3.84263	2.2551	7.87658	7.34868	8.54313	7.2488	8.61608	8.60779	3.60104	9.56354	5.51558	3.86111	2.8548	3.2943	9.27225	8.07771	7.47889	6.54775	7.02933	7.67592	2.697	12.0652	7.94395	5.10218	5.5891	5.52948
	74	11.1653	12.6052	8.75666	6.68574	9.9281	12.4321	5.0534	11.9567	8.56952	5.70375	5.72729	7.37177	7.92361	6.53795	10.6873	6.6471	9.01087	9.21463	0.0705967	9.98788	8.00635	3.49944	6.33617	5.05666	11.4825	10.7028	10.9695	9.92863	10.1971	11.9122	6.39234	12.8237	8.85543	7.1709	7.0506	7.41439	11.9033	11.2779	10.3444	8.49503	9.7455	10.4039	5.02193	14.5859	9.74241	7.43918	8.54575	9.30498
	74.5	11.9116	13.9149	10.6376	9.02762	11.9496	12.9978	7.25994	13.5755	11.1194	8.0885	8.58067	9.99475	9.62547	9.05852	12.7732	8.85313	10.8715	11.5034	2.27441	10.666	10.2949	6.40052	9.31149	8.17469	14.6478	13.41	12.9751	12.2676	11.5213	13.8344	8.69484	15.5537	12.2839	9.73763	10.4065	10.8944	13.1821	14.0773	12.5371	10.2483	11.8205	12.6289	6.98984	15.9894	11.4438	9.45249	11.3581	12.1421
	75	12.5909	14.4096	12.4841	10.7398	13.1814	13.3089	8.92132	13.7789	12.7154	10.7944	10.8482	12.5429	11.1257	10.5599	14.6571	11.1295	12.1957	13.0899	4.60279	11.0154	11.9879	8.78075	11.8964	11.1164	15.9905	15.7128	14.6462	13.954	13.2384	14.6184	10.2525	17.4541	13.7655	12.1547	12.3964	13.4406	13.5279	15.8258	14.3398	12.5543	14.0824	14.406	9.00816	16.5354	12.4878	11.5352	13.5521	14.3822
	75.5	12.7292	14.5683	13.2773	12.0432	14.1789	13.6274	10.1404	13.6887	13.2177	13.0497	13.066	14.253	12.2587	11.2339	15.5745	12.6174	12.5567	13.3576	6.86469	11.4175	12.6138	10.4472	13.5188	13.0823	16.0824	17.054	15.7063	14.9926	14.1345	15.335	11.3453	18.0565	14.4062	14.2108	14.6903	15.3638	14.0512	16.5759	15.343	13.3125	15.5127	15.1504	10.6002	17.1738	12.9693	13.5764	14.9368	15.8787
	76	13.0772	14.4469	13.1642	12.5686	14.3967	13.638	10.5992	14.1101	13.4682	14.3031	14.5445	14.7621	12.8545	11.6263	15.7289	13.0413	12.6245	13.2824	8.28174	11.8937	12.5851	12.3119	14.5476	14.1091	16.4437	17.6267	16.1113	15.3389	13.9265	15.8101	12.0348	18.1228	14.8137	15.302	16.4898	16.192	14.028	17.2939	15.6265	13.4257	15.7055	14.911	11.3138	17.3866	12.8226	14.7112	15.7073	16.0309
	76.5	13.4231	14.8798	13.2669	12.5777	14.6082	13.1961	10.8061	13.8482	12.9464	14.7731	15.6886	15.5771	13.1704	11.9739	16.0564	13.4993	12.856	12.7191	9.5101	12.4899	12.5635	13.8446	15.0466	14.4972	16.3125	17.7813	16.3109	15.4192	14.3648	15.4535	12.3739	17.7091	13.8099	16.0093	16.6033	16.3363	13.4524	17.3141	16.192	14.1985	15.6405	14.5699	11.3366	16.9954	12.9692	15.2097	16.1342	15.5189
	77	13.4674	15.0407	13.1197	12.8653	15.6663	12.7513	11.0977	13.3918	11.6319	14.7866	16.5288	16.1302	13.4024	12.4649	16.2519	13.7632	13.0914	12.2307	10.3729	13.0034	12.3411	14.3831	15.3039	14.4193	15.4863	17.8892	16.4856	15.6026	14.9593	14.784	12.6789	16.8324	12.5367	16.8844	16.727	16.4616	13.7628	16.2541	16.2465	14.5186	15.7208	14.4746	11.4858	16.3652	13.0016	15.7051	16.573	15.4039
	77.5	13.7373	15.0646	12.8125	12.6102	16.1607	13.0014	10.9257	13.9154	10.6025	14.4368	16.5966	15.4621	13.9499	13.5147	15.9905	13.0941	13.4018	12.0434	10.7303	13.4709	12.1741	14.5152	15.1792	14.7506	15.0589	17.454	16.7195	15.7733	14.4679	14.3298	13.1393	16.2746	12.5606	16.8749	16.9456	16.7306	14.504	15.929	15.8672	14.1506	15.5016	13.8817	11.1834	15.8011	12.4959	15.4572	16.692	14.9519
	78	14.943	16.0434	12.9279	12.4505	16.1042	12.9446	11.2699	14.0081	10.0752	13.6824	16.2842	15.5143	14.9989	15.0085	15.8707	12.7111	13.9782	11.9612	10.6413	13.773	12.1836	14.9562	14.9614	14.9731	15.814	17.5774	17.4629	15.5393	14.4312	13.6246	13.8395	16.0691	13.1483	16.4315	16.0996	16.7056	15.0403	16.3033	16.0878	13.8632	14.7627	12.7292	10.7501	15.3475	12.5409	13.9998	16.5523	14.202
	78.5	18.0305	19.1127	15.292	12.6903	16.2728	12.3617	11.9351	13.4675	10.2418	13.0267	15.9445	15.8366	18.1976	18.4483	18.8393	12.7437	14.1579	12.0961	10.182	13.8603	12.2024	14.4654	14.462	14.5477	19.2794	21.2395	20.7561	15.5154	14.8582	12.9345	14.2864	15.5901	13.2635	15.9352	15.3149	16.8676	18.2278	19.1338	19.6726	13.5914	14.1892	12.4539	10.8635	14.9037	13.3301	13.1843	16.5634	14.1991
	79	26.6268	28.3987	23.6535	12.5289	15.9323	13.2098	11.6413	14.0024	11.4226	12.9359	14.8282	14.4991	27.5341	26.6407	28.2809	12.0845	13.7086	12.534	9.98527	13.9919	12.0387	13.3279	13.7443	14.3207	29.3589	31.9345	30.3157	15.3489	14.4239	13.398	14.4655	16.0338	14.1199	15.2037	14.9701	16.8687	27.9627	29.5613	29.3091	13.2184	13.7225	13.1165	11.7209	15.2169	13.475	13.1611	15.9439	13.995
	79.5	40.7238	45.7816	38.9366	11.9376	14.9204	14.5149	11.585	14.9598	13.3129	13.0568	13.846	13.8078	43.808	40.8185	44.561	11.5674	13.0874	12.8053	10.3394	13.9502	12.8166	12.8558	13.3331	14.2963	47.5758	50.9583	46.6635	14.9462	13.7743	14.2474	15.0102	17.2172	15.3674	14.1977	14.7952	16.4839	44.6046	48.8793	46.0109	12.6666	13.1815	13.4086	12.6966	17.0426	14.27	12.7803	14.7431	13.6464
	80	57.2023	67.0465	57.2806	11.8147	14.422	14.9639	12.7871	16.4146	15.737	13.0834	13.3879	14.0254	63.1884	58.4128	64.7921	11.7391	12.6069	13.6567	10.7798	14.5827	14.4574	12.9726	13.1573	13.7861	70.1927	75.4355	66.3724	14.4418	14.3066	14.6759	16.2976	18.8138	16.8912	13.8651	14.5503	16.028	65.246	71.7091	66.757	12.2391	12.9673	13.6339	14.0348	19.4662	16.4062	12.1738	14.148	13.8098
	80.5	73.2196	87.9855	75.6534	11.6297	13.8358	15.1619	14.5047	20.3797	19.7121	13.4408	13.1629	13.3429	82.2427	75.8032	85.0994	11.4474	12.1345	14.5179	12.3874	17.6216	17.6574	12.2424	13.1993	13.3437	92.9805	100.085	85.7781	14.1383	14.382	15.8798	19.089	23.0066	20.3798	13.9552	14.347	15.624	86.688	93.8528	86.7396	12.54	13.3596	14.609	16.6064	23.3797	19.7216	12.8258	14.1159	14.1299
	81	83.9264	103.433	89.9188	11.1665	13.2464	16.2097	19.8302	29.1547	27.4007	15.7251	15.3361	14.8864	96.0982	88.1347	99.2953	10.893	11.8411	14.7596	18.9646	25.4406	26.2125	14.0052	15.5633	14.8003	110.87	117.281	99.5368	14.1347	14.287	16.9518	26.408	33.6618	30.2794	16.7028	16.7778	17.0702	102.541	109.787	99.98	12.6666	13.9431	15.0073	23.3204	33.1619	28.2911	16.2646	16.1109	15.5745
	81.5	83.4948	104.829	91.8377	10.9563	13.4738	16.3355	31.9344	42.8775	40.1273	25.5814	25.9412	25.5127	97.6777	89.3511	100.01	11.2091	11.914	15.1178	30.1283	37.9398	40.7345	23.9536	26.5193	23.7103	115.104	119.77	100.297	14.2559	14.8016	16.4926	39.9437	50.5009	45.7741	28.5938	28.5121	27.8593	105.402	111.117	100.286	12.1733	14.3787	14.3941	35.2643	49.1033	43.1637	26.6142	26.6197	24.8767
	82	71.4512	90.5144	79.3971	11.3056	14.1149	15.7314	46.5835	58.6956	54.9656	43.5803	46.053	45.3741	84.9589	77.3635	86.0472	11.9527	12.3573	15.6997	42.9613	52.4545	55.9286	41.2634	45.9145	41.9717	102.622	104.845	87.1686	14.7136	15.6923	16.4354	55.5995	69.4671	62.1873	49.6309	49.6972	49.9756	93.099	95.5819	87.2561	12.6128	15.0897	14.4785	48.8599	66.3845	58.7815	45.7307	47.1962	44.032
	82.5	53.3343	67.8532	59.6072	12.6805	15.7	17.5305	59.6977	72.7198	68.0401	63.274	68.7895	68.324	64.0326	57.3498	64.3307	13.6667	13.9936	17.32	55.9164	65.6292	68.9065	60.5191	67.4556	63.7005	80.8218	78.6232	66.971	16.945	17.1857	19.8158	69.6602	86.9717	76.7967	72.4696	73.8429	74.9936	70.8836	71.027	66.8548	14.8156	17.328	17.3534	62.0946	82.1505	72.1959	68.1711	70.5896	66.7393
	83	34.4663	43.5295	38.3798	18.8519	23.1908	26.9631	70.6122	82.0088	77.083	82.226	90.3987	90.9736	41.4491	36.1858	41.0955	20.8926	21.0672	26.0298	66.3166	74.2648	77.835	79.9041	88.2204	84.6602	56.1466	50.2118	45.4677	25.7774	24.7576	30.371	80.1929	98.5985	86.4594	94.0395	97.4013	99.2235	46.2829	45.612	45.9702	22.6492	25.7598	27.6352	72.3389	93.4612	81.3923	88.4778	92.5955	88.5736
	83.5	18.5503	22.1443	19.2681	32.4144	39.2557	43.6216	73.3201	81.1652	76.7022	97.0778	107.163	109.339	21.5918	17.7368	20.7914	35.5907	35.7741	43.1109	67.4018	72.8303	76.0019	94.5818	104.29	101.866	32.2251	26.1186	26.7377	43.6945	40.3211	49.3874	80.8724	97.0435	83.2744	110.254	115.388	119.211	24.8001	23.5863	28.0931	39.107	42.3754	45.6182	73.2548	92.5947	79.1124	102.787	109.909	106.501
	84	8.2733	8.05369	6.65101	49.7494	58.7404	62.6047	63.2453	68.1664	64.3662	96.0714	107.705	111.161	8.19275	5.2152	7.99628	53.0758	53.9963	62.0148	57.6917	60.3746	62.3151	93.1679	103.688	103.957	15.0593	9.89692	14.563	65.4938	58.2298	71.8421	68.6948	80.8132	67.6456	108.105	114.668	120.556	10.1183	8.81897	16.0899	59.1901	62.0567	66.1735	62.7316	77.4109	64.4525	101.225	110.593	109.446
	84.5	4.21477	2.0154	1.40755	66.696	77.7118	81.0748	47.1607	49.6608	46.7179	77.9888	88.5986	92.906	2.41048	0.355683	2.90959	69.5162	71.6878	79.7023	43.1926	43.5694	44.4362	76.2044	84.6072	86.8856	6.85213	2.63585	8.66887	86.1634	74.9726	92.6112	50.7036	58.6752	48.5102	87.4273	93.9691	99.4238	3.23401	2.63412	10.3275	78.1644	80.5811	85.5075	46.892	56.3145	45.4579	81.6578	91.7532	92.3622
	85	3.87251	0.540819	0.768932	81.1393	94.3624	94.9537	31.3305	31.4393	29.4011	55.4828	63.1714	67.0972	1.20192	-0.159026	1.27517	82.6818	86.2471	93.1554	28.0058	27.3225	27.3116	54.5879	60.51	62.3465	3.3504	1.28698	5.95372	103.293	88.3741	106.684	32.972	36.763	30.0445	62.2644	67.3804	71.5039	1.72821	1.56676	7.4453	92.9311	95.4584	98.8592	30.5887	35.6941	27.3714	56.8434	66.0813	66.8249
	85.5	4.72287	0.135924	1.15411	85.2927	99.3623	93.9696	16.1933	15.6322	14.2216	33.7271	39.249	41.7459	1.12118	0.00856813	0.908884	85.0652	89.4043	92.0608	14.3	13.3382	12.4829	33.0023	37.5287	38.6903	1.51166	1.91117	4.44372	106.572	89.3773	103.91	17.1203	17.8755	13.7962	38.0883	41.6127	44.7047	1.63637	1.42453	4.99459	94.7538	97.362	96.4086	15.8058	17.6724	11.9386	34.0158	41.475	41.8913
	86	6.05065	0.320924	1.29676	74.11	86.4934	76.938	5.33941	5.12391	4.34042	14.527	17.7334	19.1058	1.51663	0.823	1.33459	72.4443	76.6261	74.4701	5.09287	4.6419	3.23982	14.392	16.5773	17.8427	1.23206	2.28039	3.07388	90.3333	74.6618	84.0134	6.35907	5.92118	4.20632	16.4243	18.8695	20.1169	1.33016	1.10845	3.40988	79.7607	81.8567	78.2294	5.33347	6.01355	2.51145	14.3821	19.6419	20.2043
	86.5	6.99998	0.795887	1.33507	55.3035	64.6152	55.1099	1.68605	1.04426	0.841836	3.36821	4.23274	5.37698	1.88448	1.56482	0.92515	52.7146	56.1016	52.3439	1.82108	2.19387	0.19479	4.35809	3.40311	4.27381	1.48626	1.87997	1.80984	65.8976	54.0382	58.9415	1.88442	1.98905	1.38593	4.23531	5.63455	4.87643	0.777137	0.782566	2.38461	57.6686	59.639	54.8356	0.725471	2.08137	-0.126678	3.34712	5.88968	6.02561
	87	7.63186	0.853959	1.36569	36.0129	42.2479	33.7644	1.17275	0.205046	0.266565	0.897634	0.929909	1.55152	1.65236	1.29304	0.356424	33.6293	35.7435	31.8038	1.4374	1.92361	0.00292894	1.82626	0.24264	0.283189	1.20483	1.49367	1.29916	41.6619	33.8937	34.9214	1.24438	1.20833	0.574602	1.43134	2.43698	1.14387	0.524502	0.712367	1.41015	35.76	38.3228	32.1791	0.145999	1.73684	0.372279	1.36272	1.89135	1.22543
	87.5	7.41568	1.04579	0.633732	18.0138	21.2035	15.0931	0.773505	0.791483	0.646241	0.993207	0.948973	1.70146	1.49027	1.27671	0.56392	16.7427	17.47	13.9705	1.50763	1.70334	0.00376856	1.52518	-0.0594959	0.593768	1.16585	1.463	1.09447	19.4148	16.2702	14.4973	1.10685	0.715388	0.180953	1.14853	1.94555	1.81806	0.549559	0.339665	0.906782	16.9265	18.5904	13.6529	0.208003	1.6188	1.17192	1.27693	1.3604	1.33071
	88	6.07771	1.49969	0.512096	5.44554	6.17403	4.1235	1.00276	1.36083	1.04767	1.0269	0.437574	2.42121	1.72292	1.60867	0.660231	4.95694	5.10351	3.39019	1.59981	1.37496	0.576384	1.8471	-0.804162	1.25283	1.4029	1.00703	0.72455	4.66459	4.91327	3.545	0.268003	0.998502	0.337376	1.01601	1.42734	1.26538	0.426733	-0.0571964	0.94326	5.04839	5.58022	3.06301	0.111001	1.31468	1.54009	0.977826	0.637902	2.05456
	88.5	4.19877	1.13735	0.754542	0.531287	0.398463	1.51668	1.33624	1.9416	0.733487	1.03966	0.193262	2.23275	1.67847	1.18853	0.468135	0.773113	0.688062	1.62886	1.89965	0.893898	1.1616	1.62282	-0.417016	1.20052	0.790585	0.322573	0.607178	0.0459181	0.864055	1.36031	0.00498363	1.18471	0.808629	0.865321	0.984398	0.603294	0.589948	0.103573	0.538851	1.27379	1.784	0.657185	0.801481	1.02518	1.78601	0.701461	0.175083	1.33107
	89	2.8393	0.719663	0.584813	-0.25094	-0.358296	1.50726	1.00858	2.86131	0.527296	0.741912	0.240849	1.47897	1.45009	0.83739	0.838645	0.946813	0.0889152	2.48777	2.19141	0.572758	1.39549	0.935784	0.7235	1.27601	0.193187	0.484666	0.67596	-0.234794	0.515677	1.01272	0.624727	0.912662	0.799094	0.771826	0.662272	0.885621	0.855075	0.451295	0.0424132	1.57627	1.33965	1.62296	1.44591	1.39296	1.81633	0.187229	0.021187	0.51496
	89.5	1.73155	0.950495	0.878949	-0.0370433	-0.248315	1.687	0.918354	2.82733	0.571393	0.564181	0.365696	1.95599	1.43736	0.887824	1.26154	0.943448	-0.151897	2.25349	2.0259	0.599915	1.85925	0.7608	1.24116	1.39151	0.594235	0.888129	0.791242	0.241751	0.887982	1.07135	0.410806	0.863635	0.781688	0.805967	0.51899	1.09427	1.01903	0.526841	-0.224689	2.12636	0.964418	2.20067	1.01651	1.54288	1.8602	0.226815	-0.142978	0.730628
	90	1.19143	0.564573	1.46751	0.41483	-0.354728	1.57517	1.00654	1.6933	0.595808	0.717709	0.968473	1.89308	1.31556	0.738222	1.41899	0.441324	-0.499826	1.62184	1.93785	0.353421	2.25825	0.441741	1.6757	1.19714	0.611173	0.937255	0.979807	0.704823	0.549023	1.60442	0.103246	1.23817	0.846927	0.428061	0.523779	0.279123	1.1804	1.1151	0.0237466	1.67157	1.4066	1.73999	0.769953	1.59237	1.67877	0.850046	0.188998	0.435276
	90.5	1.32698	0.540506	1.31335	0.77933	-0.417808	1.24309	0.921568	1.18617	0.589636	0.666197	1.1982	0.733014	0.834296	0.358775	1.68783	0.542136	-0.522418	1.31279	1.89512	0.343835	2.17086	-0.146897	2.06789	0.209221	0.687025	0.727857	1.21876	0.850333	0.41814	1.46342	0.940932	0.925621	0.922381	0.0293903	0.661544	0.880191	1.42205	1.67307	0.240241	1.02734	1.55562	1.53939	1.10066	2.04952	1.33689	1.34259	0.556074	-0.151374
	91	1.54044	1.34318	0.99824	1.44244	-0.268708	0.882498	0.884105	0.711715	0.817633	0.680335	1.16901	0.600568	0.641854	0.317943	1.83792	0.885716	0.159715	0.86472	1.58562	0.812552	1.91315	-0.348874	1.73913	-0.29178	1.71276	0.79576	1.15469	1.09305	1.05492	1.01497	1.63843	0.595348	0.720126	0.132742	0.722799	1.89198	1.36779	1.44237	0.510457	0.987795	1.31056	1.3053	0.719432	2.55109	1.38904	1.55754	0.262857	0.197259
	91.5	1.58779	1.54714	1.37742	1.95416	-0.00410843	0.661052	0.702931	-0.477537	1.17438	1.0247	1.17658	0.355395	0.883649	0.429749	1.40368	0.662435	1.34618	0.21811	1.25603	0.789005	1.3784	-0.417945	1.40225	-0.398144	2.15099	0.744668	0.905433	1.37319	1.3348	1.50866	1.69945	0.410819	0.780978	-0.0728138	0.574291	1.19279	1.33821	1.2082	1.06116	0.793531	1.49884	0.625607	0.41173	2.49284	1.23651	1.60277	0.339668	0.39069
	92	1.4381	1.66041	1.52759	1.42412	0.0939304	0.565667	0.403112	-0.209524	1.28923	1.12379	0.972584	-1.0533	0.938099	0.47069	0.948979	0.715062	2.12489	0.274246	1.38074	0.724781	0.438003	-0.472217	1.52535	-0.577453	1.84313	0.719206	0.835803	1.37971	1.2379	1.97295	1.59173	0.578975	1.194	-0.345932	0.434831	0.98098	1.03482	1.08445	1.65401	0.657923	1.4401	0.457963	0.948101	2.29385	0.47912	1.31385	0.326132	0.170571
	92.5	1.3221	2.23961	1.47693	0.506357	0.797187	0.206221	0.353439	0.765026	0.706766	1.49675	0.342597	-0.800259	0.955336	0.481982	0.859518	1.29217	2.49425	0.784138	1.26275	0.88981	0.0790901	0.0118206	1.79594	-0.0518352	1.98098	0.956278	0.60166	1.26268	1.74079	1.76567	1.81473	0.973206	1.35977	0.0949011	0.703852	1.78135	0.512983	0.528723	1.88375	0.884789	0.735555	0.668057	0.876442	1.82491	0.0880772	0.998044	0.0628294	0.536438
	93	1.20276	2.23493	1.69659	0.0513329	1.57041	0.0352349	0.367516	0.742238	0.890156	1.42582	0.342237	0.38309	1.42451	0.537627	0.701791	1.41586	2.46528	0.76109	1.299	0.67774	-0.430602	0.544194	2.06356	0.882075	1.85042	1.90594	0.720628	1.31779	2.14205	1.7416	1.23508	1.22846	1.26792	0.493523	0.602961	1.88763	0.36808	-0.0721061	1.4471	1.46146	0.167918	1.0286	0.785053	1.29656	0.798702	0.653143	0.139678	0.754292
	93.5	1.03632	1.27447	1.71896	0.211662	2.41345	-0.734327	0.0832154	0.808979	1.45496	1.89703	0.484562	1.64886	1.96649	0.825344	1.17759	0.572735	1.97777	0.905891	1.02552	-0.695255	-0.844237	1.32572	3.09997	2.42113	1.09652	2.35205	0.856836	0.834073	2.61367	1.74992	0.821825	2.08457	0.967007	1.48336	0.523422	1.90834	0.290743	0.399447	1.13513	1.28219	0.306775	1.35186	0.941372	-0.0395104	1.13254	0.367522	0.813201	1.18494
	94	0.942783	1.06772	1.51338	-0.288483	3.20782	-1.2458	0.203266	1.34239	1.16261	2.33307	0.234823	2.95463	1.87242	0.822109	1.65785	0.479614	1.40745	1.16068	0.707173	-1.22402	-0.544455	1.93789	3.72437	3.21448	0.976526	2.57583	0.85328	0.644367	2.98838	1.72887	0.754405	2.56911	0.784353	2.01417	0.840237	2.95198	0.237394	0.467275	0.790237	1.27719	0.0644751	1.64052	0.747434	-1.12247	1.31736	0.427403	1.11034	1.68297
	94.5	0.866536	-0.454182	0.771066	1.09335	4.88848	-3.12588	-0.039018	1.35238	1.47267	4.44829	0.139575	6.27792	2.9785	1.4605	3.60267	-1.31948	0.943178	1.81553	-0.641488	-3.69135	-0.348795	3.36733	5.6388	6.22251	0.504764	2.18686	0.513221	-0.268378	4.25796	1.09227	1.74357	3.94674	0.00352568	4.39566	1.2891	4.01316	0.291643	1.70126	0.516269	0.528874	0.76298	1.89673	0.0233225	-3.57926	2.07425	0.35258	2.28553	3.37596
	95	0.250379	-1.12161	-0.0558596	1.34479	2.89078	-2.244	-0.250434	0.432971	0.829179	3.02287	-0.0337994	4.08371	1.89574	0.993071	2.51631	-1.73661	0.295249	1.08591	-1.03645	-2.89359	-0.124958	2.12074	3.45089	4.05518	-0.123331	0.468002	0.00968509	-0.593016	2.41499	0.187191	1.32059	2.23885	-0.400908	3.0226	0.78135	2.06522	0.191682	1.52215	0.146648	-0.255596	0.845544	0.853306	-0.345652	-2.78586	1.08716	0.121674	1.66366	2.27842
[truncated: 36 more columns]

## Sheet: Melt Curve Peak Results
	Well	Fluor	Target	Content	Sample	Melt Temperature	Peak Height	Begin Temperature	End Temperature	Well Note
	A01	SYBR	82	Unkn	MeJA-6h	81	83.9264	67.5	85
	A02	SYBR	82	Unkn	MeJA-12h	81.5	104.829	72	85.5
	A03	SYBR	82	Unkn	MeJA-24h	81.5	91.8377	78	85
	A04	SYBR	7	Unkn	PEG-24h	85.5	85.2927	81.5	88.5
	A05	SYBR	7	Unkn	PEG-48h	85.5	99.3623	81	88.5
	A06	SYBR	7	Unkn	PEG-72h	85	94.9537	82	88.5
	A07	SYBR	16	Unkn	PEG-24h	83.5	73.3201	79.5	87.5					O
	A08	SYBR	16	Unkn	PEG-48h	83	82.0088	78.5	87
	A09	SYBR	16	Unkn	PEG-72h	83	77.083	78	87
	A10	SYBR	g	Unkn	PEG-24h	83.5	97.0778	80	87
	A11	SYBR	g	Unkn	PEG-48h	84	107.705	80.5	88.5
	A12	SYBR	g	Unkn	PEG-72h	84	111.161	80.5	87
	B01	SYBR	82	Unkn	MeJA-6h	81.5	97.6777	72.5	85
	B02	SYBR	82	Unkn	MeJA-12h	81.5	89.3511	73	84.5
	B03	SYBR	82	Unkn	MeJA-24h	81.5	100.01	78	85.5
	B04	SYBR	7	Unkn	PEG-24h	85.5	85.0652	81	88.5
	B05	SYBR	7	Unkn	PEG-48h	85.5	89.4043	81.5	89.5
	B06	SYBR	7	Unkn	PEG-72h	85	93.1554	78.5	88.5
	B07	SYBR	16	Unkn	PEG-24h	83.5	67.4018	79	87
	B08	SYBR	16	Unkn	PEG-48h	83	74.2648	70.5	89
	B09	SYBR	16	Unkn	PEG-72h	83	77.835	79	87
	B10	SYBR	g	Unkn	PEG-24h	83.5	94.5818	80.5	87.5
	B11	SYBR	g	Unkn	PEG-48h	83.5	104.29	80.5	87.5
	B12	SYBR	g	Unkn	PEG-72h	84	103.957	80.5	87
	C01	SYBR	82	Unkn	MeJA-6h	81.5	115.104	77.5	86
	C02	SYBR	82	Unkn	MeJA-12h	81.5	119.77	78	85
	C03	SYBR	82	Unkn	MeJA-24h	81.5	100.297	72	88
	C04	SYBR	7	Unkn	PEG-24h	85.5	106.572	81.5	88.5
	C05	SYBR	7	Unkn	PEG-48h	85.5	89.3773	79.5	89
	C06	SYBR	7	Unkn	PEG-72h	85	106.684	82	89
	C07	SYBR	16	Unkn	PEG-24h	83.5	80.8724	72.5	88.5
	C08	SYBR	16	Unkn	PEG-48h	83	98.5985	78.5	87.5
	C09	SYBR	16	Unkn	PEG-72h	83	86.4594	77.5	87.5
	C10	SYBR	g	Unkn	PEG-24h	83.5	110.254	80.5	88.5
	C11	SYBR	g	Unkn	PEG-48h	83.5	115.388	80.5	89
	C12	SYBR	g	Unkn	PEG-72h	84	120.556	80.5	87
	D01	SYBR	82	Unkn	MeJA-6h	81.5	105.402	76.5	87
	D02	SYBR	82	Unkn	MeJA-12h	81.5	111.117	77.5	88
	D03	SYBR	82	Unkn	MeJA-24h	81.5	100.286	77.5	87.5
	D04	SYBR	7	Unkn	PEG-24h	85.5	94.7538	81.5	88.5
	D05	SYBR	7	Unkn	PEG-48h	85.5	97.362	80	89.5
	D06	SYBR	7	Unkn	PEG-72h	85	98.8592	82	88.5
	D07	SYBR	16	Unkn	PEG-24h	83.5	73.2548	78.5	87
	D08	SYBR	16	Unkn	PEG-48h	83	93.4612	78.5	88.5
	D09	SYBR	16	Unkn	PEG-72h	83	81.3923	78	86.5
	D10	SYBR	g	Unkn	PEG-24h	83.5	102.787	80	89
	D11	SYBR	g	Unkn	PEG-48h	84	110.593	80.5	89
	D12	SYBR	g	Unkn	PEG-72h	84	109.446	79.5	87
	E01	SYBR	g	Unkn	MeJA-6h	84	123.514	78.5	88.5
	E02	SYBR	g	Unkn	MeJA-12h	83.5	109.715	80.5	88
	E03	SYBR	g	Unkn	MeJA-24h	83.5	114.255	80	87
	E04	SYBR	10	Unkn	PEG-24h	83	69.7899	77.5	88.5
	E05	SYBR	10	Unkn	PEG-48h	83	86.6145	78	87
	E06	SYBR	10	Unkn	PEG-72h	83	83.149	78	88.5
	E07	SYBR	73	Unkn	PEG-24h	82	87.8087	78	85.5
	E08	SYBR	73	Unkn	PEG-48h	82	97.2576	78.5	85
	E09	SYBR	73	Unkn	PEG-72h	82	81.9724	78.5	85
	F01	SYBR	g	Unkn	MeJA-6h	84	108.853	78.5	87.5
	F02	SYBR	g	Unkn	MeJA-12h	83.5	114.215	79	87
	F03	SYBR	g	Unkn	MeJA-24h	83.5	105.87	80	87
	F04	SYBR	10	Unkn	PEG-24h	83	69.9886	76.5	88
	F05	SYBR	10	Unkn	PEG-48h	83	79.0701	71.5	89
	F06	SYBR	10	Unkn	PEG-72h	83	87.6527	78	91
	F07	SYBR	73	Unkn	PEG-24h	82	83.1009	78.5	85
	F08	SYBR	73	Unkn	PEG-48h	82	89.3529	78.5	85.5
	F09	SYBR	73	Unkn	PEG-72h	82	93.585	72	86
	G01	SYBR	g	Unkn	MeJA-6h	84	127.06	80	87
	G02	SYBR	g	Unkn	MeJA-12h	83.5	124.724	80.5	87
	G03	SYBR	g	Unkn	MeJA-24h	83.5	118.127	80.5	87
	G04	SYBR	10	Unkn	PEG-24h	83	49.2911	77.5	86.5
	G05	SYBR	10	Unkn	PEG-48h	83	79.9945	77	88
	G06	SYBR	10	Unkn	PEG-72h	83	93.0133	77.5	89
	G07	SYBR	73	Unkn	PEG-24h	81.5	85.4195	78.5	85.5
	G08	SYBR	73	Unkn	PEG-48h	82	109.368	78.5	85.5
	G09	SYBR	73	Unkn	PEG-72h	82	108.565	77.5	85.5
	H01	SYBR	g	Unkn	MeJA-6h	84	114.973	79	87.5
	H02	SYBR	g	Unkn	MeJA-12h	83.5	114.946	80	88.5
	H03	SYBR	g	Unkn	MeJA-24h	83.5	113.724	79	87
	H04	SYBR	10	Unkn	PEG-24h	83	79.0633	77	89
	H05	SYBR	10	Unkn	PEG-48h	83	81.5264	72	88
	H06	SYBR	10	Unkn	PEG-72h	83	84.179	72.5	87.5
	H07	SYBR	73	Unkn	PEG-24h	82	91.2284	78	85
	H08	SYBR	73	Unkn	PEG-48h	82	95.6203	78.5	86
	H09	SYBR	73	Unkn	PEG-72h	82	99.5402	78	85.5

## Sheet: Melt Curve RFU Results
	Temperature	A1	A2	A3	A4	A5	A6	A7	A8	A9	A10	A11	A12	B1	B2	B3	B4	B5	B6	B7	B8	B9	B10	B11	B12	C1	C2	C3	C4	C5	C6	C7	C8	C9	C10	C11	C12	D1	D2	D3	D4	D5	D6	D7	D8	D9	D10	D11	D12
	65	2725.44	2717.49	2636.59	2649.21	2735.83	2798.69	2624.04	2667.37	2630.65	2686.36	2762.16	2757.55	2679.13	2622.33	2724.65	2660.4	2681.46	2697.95	2627.88	2651.23	2639.62	2683.68	2749.47	2768.35	2753.06	2773.93	2738.01	2741.61	2734.45	2733.02	2646.68	2719.23	2671.66	2751.59	2777.29	2810.98	2707.73	2734.56	2721.68	2708.37	2719.89	2714.15	2604.97	2741.5	2678.22	2753.84	2781.17	2777.36
	65.5	2725.01	2716.86	2636.57	2649.26	2735.6	2799.89	2623.11	2668.09	2630.85	2686.01	2760.62	2756.47	2679.21	2622.21	2723.78	2660.6	2681.71	2698.13	2627.98	2651.1	2638.6	2682.66	2748.47	2767.42	2753.15	2772.94	2736.14	2740.92	2733.51	2733.67	2645.14	2719.48	2670.93	2749.71	2775.57	2809.54	2708.62	2733.71	2721.44	2708.04	2719.22	2714.42	2604.3	2741.62	2677.58	2753.53	2779.23	2776.55
	66	2724.58	2716.24	2636.55	2649.32	2735.37	2801.09	2622.18	2668.81	2631.06	2685.66	2759.08	2755.39	2679.3	2622.09	2722.91	2660.8	2681.96	2698.31	2628.08	2650.96	2637.58	2681.64	2747.46	2766.49	2753.24	2771.95	2734.27	2740.22	2732.57	2734.33	2643.59	2719.72	2670.21	2747.82	2773.85	2808.1	2709.5	2732.87	2721.19	2707.72	2718.56	2714.69	2603.62	2741.74	2676.94	2753.23	2777.29	2775.73
	66.5	2724.15	2715.61	2636.53	2649.37	2735.15	2802.28	2621.26	2669.53	2631.27	2685.3	2757.54	2754.31	2679.38	2621.97	2722.04	2661	2682.21	2698.49	2628.19	2650.83	2636.56	2680.62	2746.46	2765.55	2753.33	2770.96	2732.4	2739.52	2731.63	2734.98	2642.04	2719.97	2669.48	2745.94	2772.13	2806.67	2710.38	2732.03	2720.95	2707.4	2717.89	2714.97	2602.95	2741.87	2676.29	2752.93	2775.35	2774.92
	67	2723.72	2714.99	2636.5	2649.42	2734.92	2803.48	2620.33	2670.25	2631.47	2684.95	2756	2753.23	2679.46	2621.86	2721.17	2661.21	2682.46	2698.67	2628.29	2650.69	2635.54	2679.6	2745.45	2764.62	2753.41	2769.97	2730.53	2738.82	2730.69	2735.64	2640.5	2720.21	2668.75	2744.05	2770.41	2805.23	2711.26	2731.18	2720.7	2707.08	2717.23	2715.24	2602.27	2741.99	2675.65	2752.62	2773.42	2774.1
	67.5	2723.28	2714.36	2636.48	2649.48	2734.69	2804.68	2619.4	2670.97	2631.68	2684.6	2754.46	2752.14	2679.54	2621.74	2720.3	2661.41	2682.71	2698.85	2628.4	2650.56	2634.52	2678.58	2744.45	2763.69	2753.5	2768.98	2728.66	2738.12	2729.75	2736.29	2638.95	2720.46	2668.02	2742.17	2768.69	2803.79	2712.15	2730.34	2720.45	2706.75	2716.56	2715.51	2601.6	2742.11	2675.01	2752.32	2771.48	2773.29
	68	2722.85	2713.74	2636.46	2649.53	2734.46	2805.88	2618.47	2671.7	2631.88	2684.24	2752.92	2751.06	2679.63	2621.62	2719.43	2661.61	2682.96	2699.03	2628.5	2650.43	2633.51	2677.56	2743.45	2762.75	2753.59	2767.99	2726.79	2737.43	2728.8	2736.95	2637.41	2720.7	2667.3	2740.28	2766.97	2802.36	2713.03	2729.49	2720.21	2706.43	2715.9	2715.79	2600.93	2742.23	2674.36	2752.01	2769.54	2772.48
	68.5	2721.75	2713.57	2636.64	2650.07	2734.72	2807.45	2617.75	2673.15	2631.98	2683.8	2752	2750.26	2680.4	2622.44	2718.81	2661.82	2683.57	2699.87	2628.99	2650.53	2633.28	2676.98	2742.87	2761.82	2754.06	2767.88	2725.44	2737.32	2728.03	2738.38	2636.28	2721.43	2666.79	2739.08	2766.12	2801.33	2714.68	2729.84	2720.37	2706.71	2716.03	2716.65	2600.5	2743.05	2674.17	2751.7	2768.1	2772.32
	69	2719.95	2714.31	2637.55	2650.56	2735.22	2809.93	2617.59	2674.81	2632.18	2683.77	2751.75	2749.62	2681.26	2623.57	2718.76	2662.55	2684.32	2701.07	2629.63	2651.05	2633.68	2676.75	2742.78	2761.41	2755.33	2768.46	2724.98	2737.75	2727.95	2740.43	2635.47	2723.11	2667.19	2738.41	2766.03	2801.23	2717.04	2730.46	2721.2	2707.38	2716.52	2718.35	2600.37	2744.32	2675.03	2751.97	2767.32	2772.73
	69.5	2717.08	2715.62	2639.31	2651.56	2736.26	2812.8	2618.06	2676.8	2632.97	2684	2751.7	2749.73	2682.33	2624.84	2719.15	2663.79	2685.13	2703.03	2630.54	2651.44	2634.7	2677.56	2743.31	2761.31	2757.24	2770.08	2725.1	2738.73	2728.04	2743.18	2635.08	2725.51	2668.05	2738.28	2766.59	2802.11	2719.97	2732.1	2722.28	2708.67	2718.03	2720.71	2600.43	2746.18	2676.51	2753.03	2767.23	2773.92
	70	2713.62	2717.38	2641.63	2652.99	2737.85	2815.91	2619.21	2679.4	2633.93	2684.49	2752.2	2749.91	2683.7	2626.52	2720.12	2665.22	2686.12	2705.27	2631.5	2652.06	2636.13	2678.43	2743.88	2761.46	2759.81	2772.95	2726.37	2740.3	2728.42	2746.47	2635.22	2728.31	2669.49	2739.26	2768.05	2803.42	2723.06	2734.5	2724	2710.34	2719.69	2723.66	2600.62	2749.08	2678.57	2754.42	2768.35	2775.59
	70.5	2709.67	2719.62	2644.25	2654.79	2739.42	2818.69	2620.77	2682.15	2635.38	2685.66	2753.57	2750.47	2685.63	2628.75	2721.01	2667.3	2687.47	2708.07	2632.54	2652.6	2638.19	2679.71	2745.36	2762.22	2763.14	2776.61	2727.91	2742.51	2728.72	2750.06	2635.66	2731.53	2671.71	2740.98	2770.02	2805.32	2725.94	2737.23	2726.06	2712.52	2721.43	2726.84	2600.95	2752.53	2680.9	2756.56	2769.82	2777.45
	71	2705.24	2721.84	2647.42	2656.54	2740.98	2821.52	2622.4	2684.75	2637.43	2687.16	2755.04	2750.85	2687.63	2631.21	2721.95	2669.97	2688.77	2711.03	2633.91	2652.36	2640.28	2681.28	2747.05	2763.28	2767.19	2780.47	2729.42	2744.77	2729.1	2753.44	2636.37	2735.2	2674.38	2742.86	2772.2	2807.7	2728.31	2739.76	2727.98	2714.73	2723.1	2730.39	2601.39	2755.73	2683.28	2758.96	2771.45	2779.27
	71.5	2700.46	2723.55	2650.25	2658.75	2742.5	2823.24	2624.25	2687.04	2639.3	2688.66	2756.63	2751.77	2689.63	2633.69	2722.51	2672.7	2690.13	2713.94	2635.83	2650.99	2642.37	2683.23	2748.66	2764.27	2771.06	2783.99	2730.32	2746.59	2728.99	2756.49	2637.27	2738.16	2676.6	2744.98	2774.82	2810.05	2729.68	2742.17	2729.62	2716.95	2724.63	2733.32	2602.11	2758.02	2684.69	2761.3	2773.03	2781.21
	72	2695.6	2724.48	2652.07	2660.56	2743.45	2823.4	2625.9	2688.2	2640.71	2689.79	2758.55	2752.72	2691.19	2635.98	2722.36	2675.01	2690.83	2715.77	2638.19	2648.9	2644.11	2684.73	2749.83	2765.19	2774.22	2786.47	2730.5	2747.85	2728.09	2758.63	2638.27	2739.92	2678.32	2746.93	2777.63	2812.37	2730.05	2743.69	2730.74	2718.09	2724.98	2735.41	2602.75	2759.08	2685.41	2762.75	2774.09	2782.68
	72.5	2690.68	2723.56	2652.86	2661.71	2743.48	2821.77	2627.15	2687.62	2641.41	2690.62	2759.92	2753.36	2691.75	2637.68	2721.3	2676.7	2690.85	2716.89	2640.59	2645.72	2645.26	2686.53	2750.97	2766.18	2775.97	2787.46	2729.37	2747.9	2726.49	2758.87	2638.76	2740.39	2679.31	2748.04	2779.69	2814.19	2728.91	2743.87	2730.54	2718.49	2724.64	2736.33	2603.29	2757.92	2684.89	2763.34	2774.35	2783.42
	73	2685.42	2721.08	2652.33	2661.63	2742.27	2818.73	2627.53	2685.45	2640.62	2690.56	2760.1	2753.17	2691.15	2638.18	2719.31	2677.23	2689.62	2716.32	2643.02	2641.64	2645.07	2687.37	2750.85	2766.77	2775.28	2786.59	2727.09	2746.64	2724.05	2757.18	2638.59	2738.96	2678.66	2748.22	2780.45	2815.1	2726.28	2742.5	2729.06	2717.73	2723.4	2735.64	2603.35	2754.45	2682.91	2762.73	2773.6	2783.21
	73.5	2680.23	2716.98	2649.87	2660.73	2739.68	2813.94	2627.22	2681.52	2638.15	2689.52	2759.48	2751.98	2689.13	2637.09	2715.71	2676.13	2687.18	2713.99	2644.75	2637.21	2643.35	2687.37	2749.63	2766.32	2772.29	2783.86	2723.51	2743.61	2720.41	2753.78	2637.43	2735.19	2676.7	2747.14	2779.88	2814.35	2722.34	2739.25	2726.08	2715.28	2720.74	2732.73	2602.66	2749.19	2679.39	2760.81	2771.51	2781.45
	74	2674.6	2711.34	2645.95	2658	2735.4	2807.89	2625.38	2676.21	2634.54	2687.22	2757.38	2749.18	2685.73	2634.61	2710.9	2673.44	2683.18	2709.97	2645.3	2632.39	2640.03	2686.13	2747	2764.46	2767.49	2779.3	2718.59	2739.43	2715.56	2748.63	2634.93	2729.54	2673.09	2744.33	2777.46	2811.73	2717.05	2734.47	2721.62	2711.36	2716.44	2728.14	2600.62	2742.5	2675.05	2757.66	2767.99	2777.67
	74.5	2669.01	2704.58	2641.18	2654.15	2729.9	2801.64	2622.26	2669.73	2629.59	2683.81	2753.78	2744.71	2681.31	2630.62	2705.05	2669.57	2678.27	2704.87	2644.69	2627.24	2635.44	2683.8	2743.24	2761.22	2760.91	2773.25	2712.6	2733.75	2710.26	2742.07	2631.11	2722.47	2667.86	2740.06	2772.94	2807.02	2710.62	2728.05	2715.84	2706.83	2711.08	2722.42	2597.68	2734.77	2669.68	2753.42	2762.99	2772.28
	75	2662.7	2697.57	2635.35	2649.08	2723.58	2794.94	2618.21	2662.84	2623.56	2679.1	2748.88	2739.22	2676.15	2625.7	2698.17	2664.61	2672.4	2698.59	2643.02	2621.77	2629.84	2679.8	2737.75	2756.32	2753.11	2765.97	2705.67	2727.27	2704.01	2734.97	2626.35	2714.13	2661.07	2734.63	2767.24	2800.98	2704	2720.55	2709.15	2701.08	2704.62	2715.6	2593.64	2726.64	2663.71	2748.21	2756.73	2765.64
	75.5	2656.49	2690.24	2628.84	2643.49	2716.78	2788.34	2613.42	2656	2617.04	2673.08	2742.96	2732.3	2670.25	2620.19	2690.53	2658.56	2666.21	2691.97	2640.11	2616.22	2623.61	2675.12	2731.48	2750.25	2745.11	2757.69	2698.05	2719.9	2697.14	2727.49	2620.93	2705.21	2654.25	2727.98	2760.54	2793.7	2697.1	2712.38	2701.62	2694.47	2697.13	2708.18	2588.74	2718.25	2657.29	2741.9	2749.56	2758.03
	76	2649.95	2683.03	2622.2	2637.15	2709.5	2781.36	2608.18	2649.1	2610.41	2666.2	2735.92	2725.13	2663.97	2614.52	2682.71	2652.14	2659.9	2685.3	2636.26	2610.34	2617.33	2669.34	2724.33	2743.39	2737.02	2749.04	2690.06	2712.38	2690.02	2719.68	2615.07	2696.18	2646.74	2720.55	2752.64	2785.78	2690.03	2704.01	2693.91	2687.86	2689.28	2700.6	2583.17	2709.54	2650.82	2734.76	2741.89	2749.96
	76.5	2643.41	2675.73	2615.67	2631	2702.38	2774.77	2602.87	2641.98	2603.69	2658.91	2728.48	2717.52	2657.44	2608.58	2674.8	2645.54	2653.57	2678.75	2631.88	2604.31	2611.04	2662.87	2717.02	2736.25	2728.73	2740.13	2681.98	2704.61	2683.15	2711.8	2608.95	2687.17	2639.62	2712.74	2744.27	2777.61	2683.14	2695.19	2685.98	2680.99	2681.47	2693.29	2577.53	2700.95	2644.44	2727.29	2733.91	2742.1
	77	2636.56	2668.18	2608.97	2624.55	2694.8	2768.16	2597.38	2635.28	2597.57	2651.51	2720.29	2709.61	2650.81	2602.52	2666.67	2638.68	2647.04	2672.58	2626.82	2597.86	2604.8	2655.64	2709.33	2728.95	2720.8	2731.28	2673.76	2696.95	2675.64	2704.28	2602.71	2678.53	2632.97	2704.55	2736.06	2769.46	2676.47	2686.83	2677.79	2673.73	2673.64	2686.01	2571.84	2692.58	2637.87	2719.58	2725.77	2734.4
	77.5	2629.9	2660.69	2602.56	2618.19	2686.78	2761.93	2591.82	2628.47	2592.03	2644.18	2712.06	2701.54	2643.98	2596.02	2658.6	2631.89	2640.47	2666.48	2621.58	2591.32	2598.69	2648.55	2701.77	2721.79	2713.18	2722.29	2665.47	2689.01	2668.32	2697	2596.25	2670.3	2626.92	2695.97	2727.55	2761.14	2669.3	2678.84	2669.78	2666.56	2665.8	2678.89	2566.1	2684.58	2631.5	2711.7	2717.39	2726.74
	78	2622.66	2652.94	2596.05	2611.94	2678.71	2755.2	2586.39	2621.41	2586.89	2637.13	2703.76	2694.07	2636.74	2588.9	2650.61	2625.56	2633.61	2660.51	2616.16	2584.42	2592.6	2641.11	2694.18	2714.22	2705.52	2713.69	2656.92	2681.23	2661.12	2689.98	2589.54	2662.21	2620.32	2687.74	2719.25	2752.76	2661.92	2670.74	2661.78	2659.58	2658.2	2672.19	2560.67	2676.76	2625.3	2704.28	2709.12	2719.48
	78.5	2614.6	2644.24	2589.23	2605.7	2670.67	2749.04	2580.52	2614.53	2581.83	2630.49	2695.8	2686.01	2628.58	2580.66	2642.2	2619.13	2626.55	2654.48	2610.99	2577.58	2586.5	2633.72	2686.85	2706.89	2696.87	2704.12	2647.55	2673.45	2653.84	2683.35	2582.44	2654.24	2613.8	2679.56	2711.46	2744.42	2653.8	2662.06	2653.13	2652.7	2651.02	2666.04	2555.27	2669.22	2618.86	2697.63	2700.83	2712.45
	79	2603.79	2632.85	2579.83	2599.3	2662.51	2742.65	2574.57	2607.81	2576.49	2624.03	2687.91	2678.43	2617.6	2569.7	2630.76	2612.9	2619.54	2648.37	2605.94	2570.55	2580.4	2626.73	2679.74	2699.66	2685.2	2691.34	2635.19	2665.73	2646.37	2676.89	2575.28	2646.49	2606.96	2671.84	2703.88	2735.92	2642.68	2650.43	2641.15	2646	2644	2659.61	2549.7	2661.74	2612.03	2690.99	2692.64	2705.3
	79.5	2587.13	2614.63	2564.53	2593.22	2654.82	2735.76	2568.84	2600.44	2570.29	2617.51	2680.96	2671.44	2600	2553.11	2612.87	2607.03	2612.87	2641.96	2600.93	2563.59	2574.33	2620.31	2673.07	2692.55	2666.28	2670.9	2616.2	2658.14	2639.44	2669.89	2567.92	2638.08	2599.61	2664.39	2696.46	2727.6	2624.77	2631.17	2622.74	2639.5	2637.3	2652.95	2543.51	2653.78	2605.29	2684.5	2684.96	2698.47
	80	2562.68	2586.44	2540.38	2587.31	2647.54	2728.24	2562.8	2592.72	2563.06	2610.97	2673.98	2664.5	2573.28	2528.34	2585.58	2601.25	2606.44	2635.5	2595.55	2556.47	2567.42	2613.8	2666.36	2685.41	2636.92	2639.54	2587.99	2650.8	2632.46	2662.67	2560.13	2629.15	2591.5	2657.55	2689.08	2719.44	2597.44	2600.97	2594.52	2633.31	2630.77	2646.2	2536.92	2644.55	2597.55	2678.21	2677.81	2691.58
	80.5	2530.05	2547.66	2507.27	2581.41	2640.4	2720.83	2555.89	2583.6	2554.27	2604.34	2667.48	2657.46	2536.9	2494.77	2548.12	2595.34	2600.26	2628.3	2589.9	2548.6	2559.55	2607.37	2659.82	2678.72	2596.08	2595.49	2549.92	2643.67	2625.17	2655.13	2551.33	2618.81	2582.34	2650.39	2681.84	2711.52	2559.46	2559.61	2556.14	2627.17	2624.25	2639.24	2529.23	2634	2588.61	2672.1	2670.68	2684.59
	81	2490.35	2499.43	2465.48	2575.71	2633.69	2712.99	2547.7	2571.59	2542.76	2597.13	2660.35	2650.72	2491.94	2453.4	2501.51	2589.82	2594.27	2621.06	2582.42	2538.11	2548.95	2601.09	2652.7	2671.68	2544.82	2540.68	2503.18	2636.62	2618.09	2646.82	2540.33	2605.16	2570.17	2643.07	2674.22	2703.4	2511.69	2508.2	2508.89	2620.79	2617.37	2631.67	2519.67	2620.28	2577.02	2664.87	2663.26	2677.15
	81.5	2447.85	2446.41	2419.27	2570.21	2627.04	2704.73	2535.09	2553.7	2526.12	2587.47	2650.85	2641.21	2442.72	2408.38	2450.92	2584.33	2588.35	2613.53	2570.24	2522.44	2532.47	2592.15	2642.96	2662.76	2487.35	2480.54	2452.4	2629.5	2610.8	2638.36	2524.01	2584.21	2551.22	2632.31	2663.66	2693.02	2458.95	2452.11	2458.18	2614.56	2610.31	2624.35	2505.14	2599.92	2559.41	2654.75	2653.26	2667.81
	82	2408.65	2397.01	2375.83	2564.65	2620.12	2696.71	2515.35	2528.39	2502.31	2570.34	2633	2623.81	2396.46	2366.08	2403.76	2578.52	2582.27	2605.87	2552	2499.86	2508.06	2576.02	2624.91	2646.58	2432.26	2423.6	2405.02	2622.27	2603.21	2630.23	2500.04	2554.31	2524.21	2613.12	2644.28	2673.88	2408.64	2399.66	2410.68	2608.46	2602.92	2617.14	2484.12	2570.93	2533.69	2636.96	2635.16	2650.82
	82.5	2377.4	2357.28	2341.1	2558.66	2612.68	2688.56	2488.7	2495.29	2471.43	2543.54	2604.32	2595.28	2359.11	2332.31	2366.16	2572.14	2575.73	2597.56	2527.29	2470.21	2476.9	2550.51	2596.64	2620.2	2386.28	2377.49	2366.41	2614.42	2594.9	2621.34	2468.65	2515.01	2489.35	2582.31	2613.43	2642.49	2367.44	2358	2372.12	2601.6	2594.9	2609.36	2456.36	2533.8	2500.98	2608.48	2605.56	2623.17
	83	2355.48	2329.48	2316.52	2551.2	2603.49	2678.03	2456.12	2456.5	2434.99	2507.22	2564.41	2555.56	2332.75	2308.98	2339.72	2563.99	2567.42	2587.48	2496.58	2435.02	2439.91	2515.55	2557.62	2583	2351.97	2345.4	2338.3	2604.29	2585.09	2609.29	2431.04	2468.36	2448.32	2540.89	2570.58	2599.03	2338.19	2328.86	2343.97	2592.74	2584.63	2598.65	2422.59	2489.61	2462.29	2569.13	2564.8	2584.21
	83.5	2342.47	2313.28	2302.36	2538.72	2588.23	2660.5	2419.41	2414.88	2395.84	2462.15	2514.86	2505.17	2317.23	2295.7	2324.59	2550.15	2553.53	2570.3	2462.4	2397.51	2400.73	2471.5	2509.35	2536.32	2329.98	2326.64	2320.5	2587.3	2568.98	2589.7	2390.01	2418.46	2404.85	2489.32	2517.1	2544.17	2320.69	2311.85	2325.68	2577.68	2567.93	2580.57	2385.47	2442.23	2421.35	2521.1	2513.9	2535.4
	84	2336.05	2306.21	2296.25	2518.18	2563.66	2633.99	2384.69	2377.17	2360.08	2412.55	2459.75	2448.78	2310.15	2290.31	2317.78	2527.93	2531.08	2544.02	2430.81	2363.86	2365.69	2423.39	2455.87	2483.48	2318.72	2318.04	2310.57	2559.96	2544.35	2559.35	2352.09	2373.53	2366.93	2433.41	2458.04	2482.67	2312.33	2304.13	2314.97	2553.04	2541.74	2552.6	2351.05	2399.17	2385.04	2468.8	2457.45	2480.06
	84.5	2333.24	2303.99	2294.57	2489.01	2529.55	2598.02	2357.16	2347.63	2332.36	2368.62	2410.07	2397.01	2307.87	2289.32	2315.41	2497.22	2499.61	2508.5	2405.53	2337.89	2339.15	2380.69	2408.41	2435.21	2313.57	2315.35	2304.96	2521.96	2510.93	2518.15	2322.29	2338.67	2337.87	2383.99	2405.42	2426.94	2309.36	2301.71	2308.63	2518.66	2506.05	2514.63	2323.64	2365.83	2357.67	2422.56	2406.21	2428.93
	85	2331.22	2303.44	2294.1	2452.01	2486.48	2553.79	2337.6	2327.54	2313.39	2335.43	2372.3	2357.19	2306.99	2289.24	2314.26	2459.06	2460.02	2465.15	2387.78	2320.26	2321.21	2348.06	2372.23	2397.88	2311.07	2314.45	2301.35	2474.53	2470.06	2467.93	2301.44	2314.89	2318.36	2346.88	2365.18	2384.51	2308.24	2300.66	2304.14	2475.68	2461.89	2468.17	2304.3	2342.86	2339.51	2388.1	2366.91	2389.13
	85.5	2329.13	2303.2	2293.58	2409.5	2437.04	2505.33	2325.67	2315.79	2302.6	2313.09	2346.79	2329.95	2306.42	2289.29	2313.88	2416.25	2415.16	2417.57	2377.27	2310.18	2311.44	2326.14	2347.83	2372.85	2309.88	2313.69	2298.78	2420.85	2424.48	2414.04	2288.99	2301.4	2307.41	2321.65	2338	2355.4	2307.35	2299.93	2301.05	2427.76	2412.62	2418.18	2292.79	2329.69	2329.84	2365.51	2340.09	2362.14
	86	2326.41	2303.19	2292.95	2368.99	2389.77	2462.22	2320.72	2311.07	2298.34	2301.22	2332.58	2314.94	2305.78	2289.13	2313.24	2376.23	2372.99	2375.53	2372.77	2306.1	2307.86	2314.53	2334.28	2358.7	2309.31	2312.53	2296.86	2370.84	2383.02	2366.6	2283.52	2295.94	2303.56	2308.29	2323	2339.34	2306.6	2299.23	2299.01	2383.43	2367.1	2374.14	2287.81	2324.19	2326.63	2353.5	2324.92	2346.69
	86.5	2323.12	2302.84	2292.3	2336.66	2352.03	2429.29	2319.27	2309.69	2297.29	2297.34	2327.81	2309.48	2304.9	2288.48	2312.64	2344.98	2339.81	2343.95	2371.29	2304.6	2307.25	2310.47	2330.04	2353.86	2308.56	2311.51	2295.68	2331.92	2350.85	2330.99	2281.67	2294.27	2302.19	2303.81	2317.69	2333.84	2306.04	2298.81	2297.55	2349.21	2331.93	2340.89	2286.56	2322.51	2326.29	2349.81	2319.19	2340.75
	87	2319.47	2302.44	2291.63	2313.88	2325.36	2407.11	2318.5	2309.47	2296.98	2296.55	2326.84	2308.07	2303.97	2287.69	2312.33	2323.53	2316.98	2323.04	2370.46	2303.51	2307.18	2309.02	2329.41	2352.99	2307.87	2310.66	2294.94	2305.05	2328.99	2307.57	2281.02	2293.39	2301.78	2302.64	2315.86	2332.75	2305.78	2298.42	2296.6	2325.83	2307.46	2319.25	2286.45	2321.5	2326.23	2348.8	2317.58	2339.24
	87.5	2315.62	2301.97	2291.02	2300.4	2309.52	2395.04	2318.01	2309.23	2296.84	2295.95	2326.28	2307.23	2303.25	2287.17	2312.19	2310.97	2303.7	2311.65	2369.73	2302.62	2307.16	2308.2	2329.25	2352.84	2307.32	2309.98	2294.33	2289.87	2316.52	2295.43	2280.29	2292.94	2301.5	2301.87	2314.72	2331.94	2305.48	2298.14	2296.07	2312.93	2293.27	2308.03	2286.25	2320.67	2325.82	2348.04	2316.68	2338.71
	88	2312.22	2301.37	2290.92	2295.01	2303.2	2390.83	2317.63	2308.65	2296.32	2295.51	2325.87	2306.22	2302.43	2286.38	2311.77	2305.96	2298.58	2307.93	2368.93	2301.81	2307.09	2307.37	2329.44	2352.27	2306.68	2309.25	2293.86	2284.46	2311.75	2291.64	2279.97	2292.56	2301.51	2301.41	2313.85	2330.99	2305.24	2298.08	2295.62	2307.81	2287.81	2304.36	2286.23	2319.89	2325.1	2347.5	2316.16	2337.75
	88.5	2309.63	2300.57	2290.46	2293.8	2301.97	2389.66	2316.99	2307.86	2295.88	2294.92	2325.8	2304.91	2301.55	2285.65	2311.56	2304.87	2297.41	2306.96	2368.1	2301.26	2306.57	2306.42	2329.9	2351.66	2306.02	2308.99	2293.57	2283.7	2310.5	2290.56	2279.94	2291.95	2301.12	2300.85	2313.27	2330.68	2305.01	2298.12	2295.18	2306.65	2286.33	2303.72	2286.04	2319.34	2324.31	2347.06	2315.99	2336.82
	89	2307.96	2300.25	2290.2	2293.79	2301.98	2388.82	2316.37	2306.68	2295.58	2294.5	2325.64	2304.06	2300.78	2285.18	2311.24	2304.5	2297.25	2305.82	2367.04	2300.9	2305.97	2305.81	2329.75	2351.06	2305.89	2308.82	2293.22	2283.66	2310.26	2289.87	2279.86	2291.43	2300.76	2300.54	2312.85	2330.28	2304.64	2297.95	2295.1	2305.86	2285.43	2303.13	2285.44	2318.79	2323.34	2346.82	2315.94	2336.44
	89.5	2306.74	2299.78	2289.82	2293.84	2302.12	2388.08	2315.96	2305.14	2295.32	2294.17	2325.54	2303.3	2300.08	2284.76	2310.71	2303.87	2297.19	2304.55	2365.97	2300.65	2305.16	2305.43	2329.24	2350.38	2305.71	2308.47	2292.88	2283.74	2309.82	2289.43	2279.41	2291.01	2300.33	2300.06	2312.58	2329.8	2304.17	2297.69	2295.1	2304.97	2284.9	2302.09	2284.73	2317.97	2322.5	2346.8	2315.96	2336.18
	90	2306.14	2299.36	2289.29	2293.77	2302.23	2387.17	2315.43	2304	2295.01	2293.9	2325.21	2302.17	2299.36	2284.32	2310	2303.6	2297.39	2303.63	2365.01	2300.32	2304.12	2305.06	2328.53	2349.72	2305.32	2307.97	2292.42	2283.4	2309.44	2288.74	2279.45	2290.52	2299.96	2299.78	2312.3	2329.29	2303.62	2297.36	2295.25	2303.85	2284.35	2301.05	2284.41	2317.25	2321.51	2346.51	2316.02	2335.76
	90.5	2305.45	2299.17	2288.44	2293.42	2302.46	2386.53	2314.97	2303.38	2294.72	2293.47	2324.61	2301.54	2298.81	2284.05	2309.28	2303.35	2297.64	2302.9	2364.03	2300.26	2302.96	2305.01	2327.59	2349.29	2305.08	2307.57	2291.9	2283.08	2309.24	2287.91	2279.17	2289.85	2299.48	2299.64	2312.04	2329.35	2302.99	2296.59	2295.07	2303.33	2283.52	2300.33	2283.9	2316.33	2320.84	2345.96	2315.77	2335.78
	91	2304.8	2298.72	2288	2292.96	2302.62	2385.93	2314.51	2302.81	2294.39	2293.22	2324.05	2301.32	2298.48	2283.92	2308.34	2303.03	2297.81	2302.33	2363.15	2299.92	2301.99	2305.16	2326.55	2349.46	2304.52	2307.22	2291.24	2282.54	2308.92	2287.31	2278.52	2289.61	2299.07	2299.69	2311.65	2328.36	2302.23	2295.79	2295	2302.75	2282.85	2299.52	2283.39	2315.2	2320.13	2345.21	2315.54	2335.8
	91.5	2303.93	2297.89	2287.37	2292.01	2302.71	2385.63	2314.11	2302.74	2293.89	2292.75	2323.45	2300.95	2298.11	2283.71	2307.52	2302.53	2297.41	2302.05	2362.44	2299.5	2301.1	2305.34	2325.85	2349.52	2303.44	2306.78	2290.77	2281.98	2308.22	2286.78	2277.61	2289.23	2298.73	2299.54	2311.34	2327.66	2301.62	2295.16	2294.52	2302.35	2282.16	2299.08	2283.17	2313.85	2319.48	2344.43	2315.47	2335.59
	92	2303.24	2297.18	2286.64	2291.15	2302.63	2385.25	2313.82	2303.1	2293.25	2292.22	2322.91	2301.09	2297.62	2283.49	2306.94	2302.33	2296.51	2302.02	2361.84	2299.14	2300.66	2305.57	2325.09	2349.84	2302.47	2306.46	2290.32	2281.21	2307.63	2285.8	2276.85	2289.14	2298.25	2299.77	2311.08	2327.12	2300.93	2294.57	2293.94	2301.95	2281.38	2298.83	2282.88	2312.74	2318.97	2343.65	2315.21	2335.45
	92.5	2302.49	2296.18	2285.86	2290.65	2302.54	2385.1	2313.67	2302.85	2292.68	2291.6	2322.52	2301.79	2297.17	2283.24	2306.53	2301.75	2295.35	2301.72	2361.08	2298.76	2300.59	2305.74	2324.3	2350	2301.56	2306.02	2289.95	2280.62	2306.92	2284.89	2275.99	2288.62	2297.56	2299.79	2310.86	2326.56	2300.62	2294.12	2292.92	2301.64	2280.81	2298.56	2282.28	2311.6	2318.94	2343.13	2315.17	2335.35
	93	2301.92	2295.02	2285.14	2290.58	2301.81	2385.04	2313.46	2302.45	2292.45	2290.77	2322.49	2301.74	2296.6	2283	2306.08	2301.1	2294.08	2301.29	2360.56	2298.31	2300.58	2305.53	2323.28	2349.82	2300.53	2305.42	2289.68	2279.93	2305.9	2284.02	2275.13	2288.17	2296.93	2299.66	2310.41	2325.41	2300.37	2294.04	2292.14	2301.02	2280.63	2298.14	2282.01	2310.94	2318.74	2342.66	2315.1	2334.92
	93.5	2301.29	2294.07	2284.19	2290.52	2300.96	2385.13	2313.34	2302.1	2291.74	2290.11	2322.16	2301.38	2295.74	2282.68	2305.74	2300.46	2292.95	2300.94	2359.82	2298.23	2301	2305.16	2322.14	2349.04	2299.78	2304.17	2289.22	2279.37	2304.77	2283.15	2274.74	2287.32	2296.33	2299.22	2310.25	2324.67	2300.23	2294.06	2291.47	2300.27	2280.55	2297.53	2281.47	2310.4	2318.18	2342.46	2314.95	2334.57
	94	2300.87	2293.69	2283.46	2290.42	2299.4	2385.76	2313.33	2301.59	2291.1	2288.85	2322.05	2300.07	2294.7	2282.2	2304.87	2300.47	2292.12	2300.37	2359.56	2298.94	2301.34	2304.22	2320.21	2347.46	2299.36	2303.12	2288.84	2279.08	2303.29	2282.29	2274.25	2286.12	2295.96	2298.2	2309.84	2323.38	2300.08	2293.66	2291.01	2299.74	2280.35	2296.79	2281.11	2310.98	2317.63	2342.25	2314.31	2333.71
	94.5	2300.36	2293.14	2282.75	2290.59	2297.7	2386.5	2313.17	2300.84	2290.53	2287.62	2321.91	2298.26	2293.76	2281.79	2303.95	2300.16	2291.54	2299.75	2359.23	2299.63	2301.55	2303.17	2318.33	2345.64	2298.84	2301.7	2288.42	2278.8	2301.72	2281.5	2273.87	2284.69	2295.61	2297.04	2309.4	2321.75	2299.98	2293.48	2290.68	2299.09	2280.38	2295.92	2280.79	2311.64	2316.82	2342.05	2313.77	2332.78
	95	2300.07	2294.02	2282.7	2289.46	2294.98	2388.53	2313.36	2300.36	2289.74	2284.85	2321.92	2294.5	2292	2280.89	2301.66	2301.61	2291.2	2298.73	2360.07	2302.21	2301.68	2301.2	2315.1	2341.9	2298.87	2301.09	2288.35	2279.27	2299.42	2281.23	2272.69	2282.57	2295.9	2294.29	2308.67	2319.75	2299.81	2292.14	2290.5	2299.21	2279.66	2295.06	2281.04	2314.13	2315.77	2341.92	2312.26	2330.69
[truncated: 36 more columns]

## Sheet: Quantification Amplification
	Cycle	A1	A2	A3	A4	A5	A6	A7	A8	A9	A10	A11	A12	B1	B2	B3	B4	B5	B6	B7	B8	B9	B10	B11	B12	C1	C2	C3	C4	C5	C6	C7	C8	C9	C10	C11	C12	D1	D2	D3	D4	D5	D6	D7	D8	D9	D10	D11	D12
	1	-4.34475	-2.09	1.35557	-0.694716	2.27482	4.38132	-0.259189	-3.38238	-8.18531	-4.20311	4.53363	2.15574	0.95867	-5.32044	-2.04735	-2.54047	-0.455782	-1.09006	-2.77787	1.53826	4.0892	-5.38289	-1.99416	1.07955	-3.34784	-4.51999	-1.80488	-4.50378	-4.2442	2.4735	-7.10221	-0.908016	-4.08511	-3.24564	4.15926	-0.123883	2.94131	-0.503301	-4.0273	-3.33144	-4.33064	-3.3895	1.81355	1.87319	-0.497118	0.779149	-9.74997	0.270855
	2	-6.54086	1.43035	0.779575	-2.94885	0.837228	6.75079	2.69423	0.835501	-2.71327	-9.00027	3.53055	5.71771	2.69183	1.00009	-1.12397	-3.49388	1.75204	-3.66922	-2.67932	-3.13569	3.652	2.98266	-2.29412	1.64176	0.383582	-1.07417	-2.74615	-2.41856	0.76175	-2.11072	-5.31176	3.05013	-3.90141	3.2887	3.27568	6.37028	-0.600736	-0.768975	1.77971	-3.61313	-0.425162	-0.979628	-2.67695	1.0461	0.882367	3.43566	-3.28217	5.60526
	3	-3.96339	0.0853655	-0.689739	-0.638282	-2.30844	6.43663	-6.29399	-0.00909769	-2.88203	-2.83038	4.36951	-0.306031	1.92509	-2.79215	1.13976	-4.21036	-1.74828	-0.448488	0.838545	-2.39016	3.88632	3.94518	-2.35739	-2.37244	0.563676	-3.78206	1.16374	1.66658	-2.413	5.32476	-0.745928	0.431715	-2.15141	2.09011	4.71947	0.0282656	4.20897	4.12154	-0.921438	-1.9747	1.90108	-3.81598	0.709445	-0.807298	-0.459597	-0.246487	2.27693	3.04861
	4	3.79539	-1.48459	2.33855	3.71124	1.14638	7.76784	2.23556	0.947344	1.51172	3.49739	-2.65624	3.94087	3.73609	-1.22031	2.58874	-0.522208	0.367541	4.28437	2.51535	0.406032	0.476583	-2.41725	0.208797	4.1346	2.36107	-1.96525	0.735136	-1.2975	-3.18107	1.29225	0.99255	1.95513	-1.86181	1.16725	1.4031	1.59	-1.13509	0.160811	1.87326	3.68722	1.78161	1.84215	0.307825	-1.66123	2.48497	0.98964	-1.26312	2.85887
	5	1.02074	0.786419	0.223338	1.95684	-1.54079	3.46997	3.25519	0.483646	1.57868	5.12941	-0.423981	-2.5438	1.7742	3.7977	0.605716	0.747313	-1.35663	-5.33009	-4.75107	1.89994	-1.77483	-0.416218	3.39404	-1.94344	-5.23057	-1.88556	-1.56137	-4.57855	-2.27792	0.955754	-0.464044	4.32087	2.00498	0.0748091	-2.13727	2.69226	-0.574339	-1.02454	-1.81467	3.0627	-1.83502	0.254152	0.157047	5.28366	3.70756	2.72574	-4.11945	3.05075
	6	-2.43733	2.24225	-0.391149	-4.64843	1.00784	2.26257	-0.0907099	0.295984	1.0142	-4.36294	0.585116	-1.16323	-0.412372	1.66308	4.09298	-2.00781	3.68006	0.0348183	-0.469388	-1.74813	1.31227	-1.20343	1.56908	0.814937	-2.6962	5.66433	-2.3574	1.71567	-0.0214226	-0.052193	3.36542	-2.55792	1.65143	2.30853	0.56934	-1.83449	1.42125	-3.76149	-1.71501	-1.55841	0.623534	3.7958	-3.66359	4.95563	-1.69809	-3.07288	0.177696	1.40214
	7	1.1928	0.80528	1.47955	2.1856	1.53014	5.82842	2.36297	-0.19358	4.00172	-1.55942	1.87085	2.87383	0.320097	-0.499169	-0.217907	5.74507	-3.43625	-1.6498	3.16633	-1.67338	3.54552	2.67843	-1.03288	3.15355	3.29696	2.08802	2.632	1.00039	2.0381	-1.17806	-0.262138	-0.9286	0.375946	0.63632	-0.511403	-4.54636	2.11401	-2.01432	1.23757	-3.23438	3.2526	1.80006	3.81242	3.36503	2.50874	1.05672	5.79097	1.14724
	8	-0.503576	0.326782	-1.81764	4.58816	4.74802	1.70136	5.81636	1.01273	-0.797626	2.90142	-1.657	4.16113	-0.353666	2.38814	1.42799	-2.09969	1.49302	-0.283059	4.64622	1.29264	-1.86315	-1.62016	-1.93774	2.41445	1.30731	1.86587	1.22881	4.95376	4.08444	1.83864	-0.429625	-2.16568	1.48127	-1.40386	-3.86681	5.70776	4.22716	3.21805	2.58602	2.6247	-2.0482	1.79008	2.66218	-0.197423	5.82128	0.977631	-0.866313	-3.18434
	9	-2.14706	-0.952619	-0.894739	-1.74198	1.87681	-0.216993	3.15333	1.39007	-3.09763	-1.22648	-5.55387	-6.00573	3.06115	-0.576966	3.29758	1.91708	-0.204367	2.30562	1.10163	2.86628	2.22379	-1.93315	0.128644	-2.44165	-4.6156	4.87875	-1.2249	-0.35142	0.72662	0.094637	3.22745	-0.708691	0.573206	-2.82676	3.25797	3.08733	-2.52441	3.96544	0.647095	-1.70714	-2.50983	-0.665684	2.28612	-1.89325	-1.39896	2.30544	2.04985	-5.86013
	10	4.66521	2.05408	1.96152	-2.77167	-4.18942	-0.543104	0.885651	-0.387866	-0.807739	-0.447756	4.68828	-1.00947	-3.6753	-1.66069	-0.869335	0.201135	-0.140426	2.52795	-0.429816	-1.08394	-0.962185	-1.41839	3.90537	-3.31251	3.25863	-1.32726	-0.746034	1.0762	4.94295	3.87387	-0.294205	0.0531664	6.15002	0.893169	1.24388	-2.9648	-0.634294	2.45044	1.4697	2.37677	-0.537159	1.21859	-3.2568	-3.60171	-2.6892	-3.84927	-1.06928	-1.95905
	11	2.86293	-0.0663614	-1.95351	-3.18353	-2.01004	-0.515401	-5.20787	0.80551	-0.320108	-3.62908	3.69813	0.147045	0.740265	2.47693	-0.985437	3.1536	0.88394	-0.0770755	-1.93637	8.26076	-0.530951	3.29214	0.73877	-3.51283	4.68708	0.133775	4.44028	0.72864	4.06995	0.131237	0.130033	1.86647	-2.59535	2.00926	-0.455671	-1.42893	-2.17838	-0.247047	0.543483	-3.25802	2.26271	2.83981	1.02414	-0.024169	-6.56984	-1.4946	-0.809357	-3.04236
	12	-2.92306	1.9277	4.23008	1.71648	3.78557	-1.17019	-0.045668	-0.11888	0.391525	1.34443	0.920117	3.26345	-0.210206	0.63067	-1.49635	1.9103	1.38271	3.47233	2.345	-1.10745	-2.45442	0.834361	-1.3105	5.63806	-0.471773	0.555083	-0.841695	0.197099	1.43373	-3.49354	0.447151	-0.27833	-0.990294	-2.52959	-5.1263	0.974394	-5.78533	-1.15642	2.79965	-0.751162	3.49749	0.0944716	3.12095	-6.07235	-1.87621	-0.719163	0.345113	-0.588496
	13	-0.55513	-0.153645	-4.94601	-1.89039	-1.72767	-5.69175	3.11815	0.259075	-0.987218	0.0976785	-1.12116	0.920915	-1.84409	-4.18782	-2.49375	-0.765769	3.56375	5.23419	1.97024	2.05677	-2.89033	0.127182	-0.71561	-0.835692	-0.330171	-1.99437	2.84573	2.42757	3.73147	-0.950157	-1.87684	-1.06832	-5.0001	-0.690426	3.70912	1.91885	1.31253	-1.68361	2.22828	1.33411	-2.27564	-0.137986	-1.553	3.64748	0.67508	3.71357	5.06293	-2.0663
	14	-0.120867	-2.02575	-0.918555	2.33975	2.29246	-8.27991	0.916046	-3.7809	-1.82804	2.09834	2.34719	10.1917	0.348234	0.816951	-0.0185259	2.16052	-0.843134	-1.93487	-2.07434	-4.57616	-2.61728	6.25656	5.59827	1.04167	1.96665	3.1741	-1.64718	-1.44429	-0.390106	-0.800154	-2.70322	3.12524	2.5873	5.46271	4.07432	0.363034	0.912545	-1.09409	-1.38064	0.0387422	1.68151	-1.51522	-1.10039	2.43821	0.712929	5.39617	8.84777	3.13554
	15	3.54837	-3.62127	-1.59917	-1.20124	-2.39309	-4.18789	0.963359	1.17371	2.46109	10.1367	12.2195	9.77025	1.02928	3.07379	-2.21207	2.39086	0.99702	-2.14584	-1.96231	1.95541	-0.213892	11.5332	15.9119	12.9673	3.9093	-2.97842	-3.69254	-1.67247	-0.920939	-4.30677	2.2177	4.07017	0.156006	7.55174	6.09721	9.54016	-1.26078	0.192689	-2.49176	0.887615	0.445015	-3.98453	1.86539	-0.651286	0.554482	17.6529	15.7627	8.41706
	16	2.7982	3.21317	2.59811	1.51579	-3.47522	-4.13367	-2.73794	0.762658	3.1324	23.3413	21.4216	22.749	-5.07695	-0.482792	-2.86823	-2.66565	3.30946	-1.10834	1.52914	0.858349	-2.05885	21.3457	25.922	26.1945	-0.539305	-2.92514	1.28264	-1.31075	0.217622	2.43176	-0.936529	1.49146	-1.34379	17.7159	24.0712	25.1341	-1.75275	1.05794	-0.814691	1.2503	-2.88301	-1.79775	-3.02023	0.217677	-1.09085	26.7927	24.2279	15.579
	17	-2.09294	2.65689	-0.317148	-2.49906	4.06952	-13.8883	-6.45156	-2.77819	-2.08658	45.5689	50.0751	44.8417	-3.04165	1.0774	0.697849	-3.00117	-1.53066	-1.42545	-3.40814	0.656445	2.31858	45.5981	46.7549	45.6152	-2.12188	-0.148582	-1.01259	-1.48597	-1.45762	-8.33392	-3.26052	-3.08654	2.984	41.6351	45.4658	53.1162	0.68938	0.938491	-0.0705973	3.00689	1.11354	-1.53047	2.15434	-0.0974182	-1.38107	50.7282	49.6988	44.4142
	18	-0.290936	-0.437155	2.80191	-3.41065	3.42154	-1.11736	-3.35418	4.18823	0.282374	81.2501	87.6306	86.2926	-2.22915	2.21564	-0.245693	-3.29673	-0.349398	-0.624332	-1.6652	-2.79379	5.57619	76.9914	85.0403	81.5277	-2.45445	-0.292889	-0.114022	-3.04382	-0.581552	0.995578	-1.49593	2.4096	-0.973887	85.8474	86.9674	97.2873	0.751617	-2.68037	-1.03561	-0.48427	-2.72685	-3.15849	-3.02086	4.66479	1.70845	88.9046	93.8433	86.242
	19	-3.39452	-2.44072	-2.08648	-4.45449	-5.53816	-8.36068	-3.84571	0.672932	6.91175	141.72	149.322	153.032	-0.971078	-2.99796	-1.2173	0.0895844	-1.36276	1.64988	0.812934	-0.616408	2.08862	133.665	149.149	146.902	1.22402	3.04922	-0.200772	0.646505	0.163483	-1.35376	1.72857	2.43382	4.7469	149.46	156.134	166.997	-0.0548233	0.408119	-0.989448	-0.279158	-2.10989	3.51327	-1.73832	4.27155	5.92943	150.622	162.37	148.55
	20	-1.34295	-0.209054	-0.728746	1.65672	-4.80534	-4.80808	-1.16955	3.87909	13.422	194.031	204.947	213.718	-4.32755	-3.20038	-3.4117	-1.95559	0.910632	2.56855	0.398748	4.29749	6.3466	184.188	206.633	204.246	1.50873	-0.105746	1.15818	-1.68736	-3.77411	3.97732	4.95301	10.3366	18.3982	209.264	218.774	231.919	-0.769577	-1.23823	-0.390904	-3.58664	-0.848328	5.69883	3.5147	11.334	5.11276	208.477	227.289	206.741
	21	2.51002	-3.73762	-1.18633	4.8741	2.59568	-7.14671	6.55775	16.5796	27.6799	234.757	251.896	260.797	0.522166	-0.930607	-1.88335	2.2326	-2.26046	10.0112	5.18017	13.1169	21.5332	221.872	252.756	248.64	-0.730231	-1.27508	-2.47935	3.94926	0.837338	10.3736	5.33656	14.9775	30.8386	258.841	268.056	283.617	-0.0633348	-1.17369	-1.75067	2.22077	-2.96643	10.148	2.29863	17.6074	22.9176	251.67	274.804	252.975
	22	0.23479	2.38601	3.57754	2.72678	3.78723	13.1738	6.03883	26.1891	52.6413	263.244	282.653	296.369	0.162871	0.27321	-5.24802	1.09514	0.472654	19.4783	5.46238	22.4872	43.2936	249.412	284.228	278.977	-0.32644	-1.90527	0.826805	2.11537	1.50203	18.3083	14.3079	32.9008	48.9346	292.633	301.01	320.033	4.25804	0.0334181	2.09614	0.610384	3.64726	22.2374	6.30232	32.1671	44.0634	282.109	309.638	287.017
	23	7.48189	-3.62738	0.108317	4.48466	7.61075	32.928	16.1854	48.4632	85.8617	287.891	310.012	323.463	4.76242	2.35992	-0.734516	8.65012	5.57395	43.0302	15.3057	49.6654	77.9566	270.92	308.717	305.267	-0.383036	2.65884	4.32994	7.77877	2.82488	39.2495	20.0972	60.7003	98.3823	318.016	328.479	346.923	1.71571	-1.0858	0.920059	4.80043	5.51379	39.9811	22.275	58.9693	83.2257	303.037	335.612	313.108
	24	7.54776	3.41721	-1.585	14.6719	16.6556	59.5487	39.2734	92.6998	141.456	310.079	334.461	350.128	7.99355	-4.86555	-3.15237	10.2344	10.4654	83.6521	36.2093	89.455	129.01	294.638	332.466	326.284	7.67494	0.55562	-0.33323	13.3751	4.91124	84.7968	48.1896	116.524	154.77	340.108	354.231	373.542	4.14461	-1.79826	-3.4123	13.4998	13.0482	81.5281	42.1126	114.651	138.208	327.616	362.275	338.252
	25	18.674	3.82038	0.969723	21.3615	29.4346	126.813	77.4454	154.15	193.272	328.212	353.913	369.078	14.9342	2.99328	3.92478	24.4053	20.813	137.649	65.148	146.516	179.651	312.863	350.608	345.577	18.4937	1.63509	-0.709804	23.865	16.7949	150.579	88.7497	182.027	212.003	358.237	376.637	393.463	12.7285	1.04067	3.31566	22.2397	24.4758	142.806	78.4285	176.904	191.223	346.97	384.607	355.426
	26	31.3251	-0.339015	5.96986	42.3992	47.8153	192.991	128.263	213.366	239.047	342.619	369.077	384.139	36.4976	2.55326	3.76988	41.6263	38.1577	198.299	112.485	199.781	223.348	326.928	366.506	357.183	43.4897	4.28055	3.85892	48.3592	39.0675	219.876	145.406	250.752	261.95	373.42	392.96	409.947	26.887	6.28597	2.03343	41.1187	48.8045	208.345	131.135	243.347	238.429	363.347	399.224	369.589
	27	63.5974	5.16703	12.0492	75.351	86.501	255.126	178.958	265.716	273.798	355.145	380.365	394.001	68.4111	5.87484	10.0839	77.6128	73.2037	258.38	160.61	245.287	256.902	336.968	377.918	371.076	78.2962	14.2226	14.2404	85.9252	75.7272	288.076	206.271	313.814	298.738	385.087	404.565	422.542	57.4717	5.5083	9.10265	79.1583	82.9304	270.767	184.521	303.119	272.055	373.324	412.161	379.744
	28	120.335	16.4062	22.2836	128.213	154.667	301.314	224.498	304.678	298.238	362.705	388.883	406.051	121.669	15.7465	8.56057	130.092	131.938	305.086	204.3	279.268	280.343	344.817	388.187	379.814	144.796	27.6641	24.2262	155.269	142.226	337.783	264.208	358.096	325.847	396.491	412.531	431.841	101.575	16.3815	15.8833	140.466	150.139	316.891	234.242	347.372	295.086	382.306	420.583	389.988
	29	184.529	39.3112	37.6203	185.849	227.48	334.093	258.808	330.297	315.042	368.765	397.231	415.01	184.141	35.1908	35.9298	188.484	194.995	334.473	237.455	305.127	297.848	352.412	394.388	389.328	217.679	58.4644	44.8122	231.293	211.864	371.27	308.967	387.421	343.443	403.687	417.68	440.386	172.235	33.2126	34.3537	207.135	223.928	346.554	270.427	377.844	313.193	389.039	430.518	398.145
	30	251.752	74.2753	70.6316	243.415	296.676	353.401	281.193	348.455	324.911	374.584	405.631	424.013	249.831	60.6592	69.4152	245.986	259.565	353.807	259.393	322.354	308.782	357.766	399.734	394.182	293.007	103.206	85.9809	307.87	278.267	390.16	337.902	408.461	354.723	409.779	423.845	447.559	243.758	71.4938	64.1611	275.532	295.91	364.649	295.262	398.115	324.41	395.571	437.257	404.711
	31	311.812	140.113	122.897	290.145	351.827	365.44	295.891	359.709	334.78	381.355	413.198	425.911	303.338	116.282	133.549	294.91	311.983	367.238	271.179	333.619	315.174	363.735	405.527	399.483	358.131	179.863	156.316	368.88	332.079	405.372	355.746	425.639	363.802	411.561	428.23	454.136	307.957	134.256	122.944	328.366	353.234	379.561	309.27	413.893	331.87	398.057	443.085	407.888
	32	355.547	212.496	183.179	320.071	387.866	374.438	304.753	369.012	340.015	386.025	416.022	430.7	339.394	174.692	202.848	326.641	347.077	378.077	278.668	340.706	320.432	367.747	409.549	402.716	404.036	261.202	232.947	410.177	367.748	415.569	367.124	438.056	369.843	414.72	434.536	459.661	354.34	205.427	191.66	363.876	390.003	388.042	316.426	422.902	337.305	403.401	445.274	410.022
	33	383.594	284.979	243.264	337.023	410.034	380.722	311.753	373.178	345.702	389.464	416.721	433.049	361.642	232.542	273.711	345.817	367.139	385.226	282.76	345.953	322.397	369.858	413.199	406.066	433.307	338.86	308.548	434.633	389.876	423.228	376.599	443.728	375.309	416.905	437.44	462.095	382.071	280.929	269.468	383.741	412.267	395.542	323.218	428.847	342.722	407.11	449.19	412.204
	34	402.107	343.422	292.136	348.403	426.465	386.296	315.552	377.843	347.545	394.24	418.677	438.787	375.382	279.012	333.16	357.87	377.645	389.63	285.822	350.836	325.371	371.86	414.916	409.627	451.188	400.082	370.831	447.94	402.548	427.49	382.826	446.369	377.116	422.046	440.861	464.731	398.295	347.076	336.453	395.804	424.834	400.705	327.959	432.653	347.197	411.261	451.208	416.806
	35	414.039	383.879	322.654	356.627	437.916	389.007	319.127	379.817	350.834	397.798	421.886	439.001	384.277	311.437	373.917	367.529	387.077	392.912	287.67	352.65	327.652	374.05	417.185	413.399	462.244	438.089	412.104	458.592	412.318	429.432	386.673	447.446	378.738	423.477	441.31	465.578	409.079	394.053	386.635	405.766	434.021	406.535	333.485	436.7	349.225	411.178	455.238	420.005
	36	423.915	408.072	343.435	364.662	446.074	390.627	320.572	381.177	352.335	399.645	426.074	443.835	391.533	330.741	400.453	376.425	394.251	394.182	288.167	354.71	329.678	378.738	419.874	417.99	470.324	461.595	437.652	467.616	418.35	430.384	388.482	451.745	381.483	424.908	444.885	466.597	417.022	421.637	416.736	411.679	441.828	410.071	334.696	438.108	350.385	415.088	459.829	423.932
	37	428.803	426.185	354.528	368.134	450.871	392.4	322.987	383.689	352.853	399.836	426.206	445.675	395.943	343.51	417.14	381.332	401.145	396.706	289.16	357.076	329.916	380.699	420.714	419.71	474.616	475.072	452.939	475.817	424.872	430.218	390.598	453.383	382.422	425.332	444.808	470.026	420.437	440.108	435.185	417.104	448.122	410.333	335.742	439.345	352.467	414.417	463.714	423.322
	38	433.279	435.431	364.649	373.43	454.655	393.226	323.188	383.427	352.737	401.894	429.654	451.548	399.767	352.741	430.99	384.188	404.41	397.388	290.951	359.219	328.646	383.573	423.469	421.763	477.821	487.926	464.95	479.695	428.01	431.016	392.341	454.527	384.561	427.381	445.599	471.952	423.413	450.613	447.484	421.118	452.952	410.63	338.155	439.548	350.02	417.214	465.057	424.545
	39	435.09	442.686	371.311	374.508	456.277	394.614	322.717	383.472	351.647	404.763	431.018	450.938	400.368	358.846	438.558	385.387	405.149	398.816	290.905	358.425	330.019	384.417	424.353	422.282	480.912	493.814	472.276	481.557	429.241	430.938	391.019	452.789	382.747	428.765	444.426	472.554	424.685	461.833	456.653	424.668	454.713	409.428	339.845	439.285	348.222	415.171	463.665	426.328
	40	437.189	446.509	379.195	375.595	456.689	394.958	320.611	381.386	350.929	407.242	433.373	448.973	401.294	364.126	442.396	386.901	404.955	399.385	288.97	355.535	332.637	385.795	428.436	423.73	485.935	496.756	476.784	483.682	427.407	430.562	388.037	452.849	381.49	429.675	446.141	469.89	426.982	470.774	464.771	426.845	455.142	408.91	342.174	436.73	346.608	416.732	462.478	431.298
[truncated: 36 more columns]

## Sheet: Quantification Cq Results
	Well	Fluor	Target	Content	Sample	Biological Set Name	Cq	Cq Mean	Cq Std. Dev	Starting Quantity (SQ)	Log Starting Quantity	SQ Mean	SQ Std. Dev	Set Point	Well Note
	A01	SYBR	82	Unkn	MeJA-6h		25.9388	25.9388	0				0	60
	A02	SYBR	82	Unkn	MeJA-12h		28.6175	28.6175	0				0	60
	A03	SYBR	82	Unkn	MeJA-24h		28.539	28.539	0				0	60
	A04	SYBR	7	Unkn	PEG-24h		25.4368	25.4368	0				0	60
	A05	SYBR	7	Unkn	PEG-48h		25.0607	25.0607	0				0	60
	A06	SYBR	7	Unkn	PEG-72h		22.8796	22.8796	0				0	60
	A07	SYBR	16	Unkn	PEG-24h		23.6222	23.6222	0				0	60
	A08	SYBR	16	Unkn	PEG-48h		22.1958	22.1958	0				0	60
	A09	SYBR	16	Unkn	PEG-72h		21.115	21.115	0				0	60
	A10	SYBR	g	Unkn	PEG-24h		16.3243	16.3243	0				0	60
	A11	SYBR	g	Unkn	PEG-48h		16.3186	16.3186	0				0	60
	A12	SYBR	g	Unkn	PEG-72h		16.3531	16.3531	0				0	60
	B01	SYBR	82	Unkn	MeJA-6h		25.7242	25.7242	0				0	60
	B02	SYBR	82	Unkn	MeJA-12h		28.7613	28.7613	0				0	60
	B03	SYBR	82	Unkn	MeJA-24h		28.8034	28.8034	0				0	60
	B04	SYBR	7	Unkn	PEG-24h		25.3568	25.3568	0				0	60
	B05	SYBR	7	Unkn	PEG-48h		25.5614	25.5614	0				0	60
	B06	SYBR	7	Unkn	PEG-72h		22.4701	22.4701	0				0	60
	B07	SYBR	16	Unkn	PEG-24h		23.7293	23.7293	0				0	60
	B08	SYBR	16	Unkn	PEG-48h		22.2967	22.2967	0				0	60
	B09	SYBR	16	Unkn	PEG-72h		21.4144	21.4144	0				0	60
	B10	SYBR	g	Unkn	PEG-24h		16.3795	16.3795	0				0	60
	B11	SYBR	g	Unkn	PEG-48h		16.2222	16.2222	0				0	60
	B12	SYBR	g	Unkn	PEG-72h		16.2243	16.2243	0				0	60
	C01	SYBR	82	Unkn	MeJA-6h		25.4823	25.4823	0				0	60
	C02	SYBR	82	Unkn	MeJA-12h		28.0937	28.0937	0				0	60
	C03	SYBR	82	Unkn	MeJA-24h		28.3072	28.3072	0				0	60
	C04	SYBR	7	Unkn	PEG-24h		25.2729	25.2729	0				0	60
	C05	SYBR	7	Unkn	PEG-48h		25.6176	25.6176	0				0	60
	C06	SYBR	7	Unkn	PEG-72h		22.5846	22.5846	0				0	60
	C07	SYBR	16	Unkn	PEG-24h		23.3721	23.3721	0				0	60
	C08	SYBR	16	Unkn	PEG-48h		21.8689	21.8689	0				0	60
	C09	SYBR	16	Unkn	PEG-72h		20.9768	20.9768	0				0	60
	C10	SYBR	g	Unkn	PEG-24h		16.5366	16.5366	0				0	60
	C11	SYBR	g	Unkn	PEG-48h		16.3028	16.3028	0				0	60
	C12	SYBR	g	Unkn	PEG-72h		16.1936	16.1936	0				0	60
	D01	SYBR	82	Unkn	MeJA-6h		26.1198	26.1198	0				0	60
	D02	SYBR	82	Unkn	MeJA-12h		28.8418	28.8418	0				0	60
	D03	SYBR	82	Unkn	MeJA-24h		28.7941	28.7941	0				0	60
	D04	SYBR	7	Unkn	PEG-24h		25.4402	25.4402	0				0	60
	D05	SYBR	7	Unkn	PEG-48h		25.2497	25.2497	0				0	60
	D06	SYBR	7	Unkn	PEG-72h		22.4685	22.4685	0				0	60
	D07	SYBR	16	Unkn	PEG-24h		23.4172	23.4172	0				0	60
	D08	SYBR	16	Unkn	PEG-48h		21.889	21.889	0				0	60
	D09	SYBR	16	Unkn	PEG-72h		21.361	21.361	0				0	60
	D10	SYBR	g	Unkn	PEG-24h		16.157	16.157	0				0	60
	D11	SYBR	g	Unkn	PEG-48h		16.2482	16.2482	0				0	60
	D12	SYBR	g	Unkn	PEG-72h		16.5192	16.5192	0				0	60
	E01	SYBR	g	Unkn	MeJA-6h		16.0727	16.0727	0				0	60
	E02	SYBR	g	Unkn	MeJA-12h		16.2185	16.2185	0				0	60
	E03	SYBR	g	Unkn	MeJA-24h		16.162	16.162	0				0	60
	E04	SYBR	10	Unkn	PEG-24h		28.435	28.435	0				0	60
	E05	SYBR	10	Unkn	PEG-48h		28.3554	28.3554	0				0	60
	E06	SYBR	10	Unkn	PEG-72h		25.3143	25.3143	0				0	60
	E07	SYBR	73	Unkn	PEG-24h		23.3622	23.3622	0				0	60
	E08	SYBR	73	Unkn	PEG-48h		25.2863	25.2863	0				0	60
	E09	SYBR	73	Unkn	PEG-72h		25.246	25.246	0				0	60
	F01	SYBR	g	Unkn	MeJA-6h		16.4115	16.4115	0				0	60
	F02	SYBR	g	Unkn	MeJA-12h		16.077	16.077	0				0	60
	F03	SYBR	g	Unkn	MeJA-24h		16.5011	16.5011	0				0	60
	F04	SYBR	10	Unkn	PEG-24h		28.1242	28.1242	0				0	60
	F05	SYBR	10	Unkn	PEG-48h		27.9657	27.9657	0				0	60
	F06	SYBR	10	Unkn	PEG-72h		25.559	25.559	0				0	60
	F07	SYBR	73	Unkn	PEG-24h		23.2888	23.2888	0				0	60
	F08	SYBR	73	Unkn	PEG-48h		25.4146	25.4146	0				0	60
	F09	SYBR	73	Unkn	PEG-72h		25.1181	25.1181	0				0	60
	G01	SYBR	g	Unkn	MeJA-6h		16.0153	16.0153	0				0	60
	G02	SYBR	g	Unkn	MeJA-12h		16.2981	16.2981	0				0	60
	G03	SYBR	g	Unkn	MeJA-24h		15.936	15.936	0				0	60
	G04	SYBR	10	Unkn	PEG-24h		28.9122	28.9122	0				0	60
	G05	SYBR	10	Unkn	PEG-48h		28.1447	28.1447	0				0	60
	G06	SYBR	10	Unkn	PEG-72h		25.0785	25.0785	0				0	60
	G07	SYBR	73	Unkn	PEG-24h		23.1277	23.1277	0				0	60
	G08	SYBR	73	Unkn	PEG-48h		24.926	24.926	0				0	60
	G09	SYBR	73	Unkn	PEG-72h		24.8026	24.8026	0				0	60
	H01	SYBR	g	Unkn	MeJA-6h		16.1358	16.1358	0				0	60
	H02	SYBR	g	Unkn	MeJA-12h		16.3032	16.3032	0				0	60
	H03	SYBR	g	Unkn	MeJA-24h		16.5218	16.5218	0				0	60
	H04	SYBR	10	Unkn	PEG-24h		28.3116	28.3116	0				0	60
	H05	SYBR	10	Unkn	PEG-48h		28.5113	28.5113	0				0	60
	H06	SYBR	10	Unkn	PEG-72h		25.1161	25.1161	0				0	60
	H07	SYBR	73	Unkn	PEG-24h		23.1765	23.1765	0				0	60
	H08	SYBR	73	Unkn	PEG-48h		25.1978	25.1978	0				0	60
	H09	SYBR	73	Unkn	PEG-72h		25.2565	25.2565	0				0	60

## Sheet: Melt Curve Plate View Results
		1	2	3	4	5	6	7	8	9	10	11	12
A	Content	Unkn	Unkn	Unkn	Unkn	Unkn	Unkn	Unkn	Unkn	Unkn	Unkn	Unkn	Unkn
A	Sample
A	Peak 1	81	81.5	81.5	85.5	85.5	85	83.5	83	83	83.5	84	84
A	Peak 2	None	None	None	None	None	None	None	None	None	None	None	None
B	Content	Unkn	Unkn	Unkn	Unkn	Unkn	Unkn	Unkn	Unkn	Unkn	Unkn	Unkn	Unkn
B	Sample
B	Peak 1	81.5	81.5	81.5	85.5	85.5	85	83.5	83	83	83.5	83.5	84
B	Peak 2	None	None	None	None	None	None	None	None	None	None	None	None
C	Content	Unkn	Unkn	Unkn	Unkn	Unkn	Unkn	Unkn	Unkn	Unkn	Unkn	Unkn	Unkn
C	Sample
C	Peak 1	81.5	81.5	81.5	85.5	85.5	85	83.5	83	83	83.5	83.5	84
C	Peak 2	None	None	None	None	None	None	None	None	None	None	None	None
D	Content	Unkn	Unkn	Unkn	Unkn	Unkn	Unkn	Unkn	Unkn	Unkn	Unkn	Unkn	Unkn
D	Sample
D	Peak 1	81.5	81.5	81.5	85.5	85.5	85	83.5	83	83	83.5	84	84
D	Peak 2	None	None	None	None	None	None	None	None	None	None	None	None
E	Content	Unkn	Unkn	Unkn	Unkn	Unkn	Unkn	Unkn	Unkn	Unkn
E	Sample
E	Peak 1	84	83.5	83.5	83	83	83	82	82	82
E	Peak 2	None	None	None	None	None	None	None	None	None
F	Content	Unkn	Unkn	Unkn	Unkn	Unkn	Unkn	Unkn	Unkn	Unkn
F	Sample
F	Peak 1	84	83.5	83.5	83	83	83	82	82	82
F	Peak 2	None	None	None	None	None	None	None	None	None
G	Content	Unkn	Unkn	Unkn	Unkn	Unkn	Unkn	Unkn	Unkn	Unkn
G	Sample
G	Peak 1	84	83.5	83.5	83	83	83	81.5	82	82
G	Peak 2	None	None	None	None	None	None	None	None	None
H	Content	Unkn	Unkn	Unkn	Unkn	Unkn	Unkn	Unkn	Unkn	Unkn
H	Sample
H	Peak 1	84	83.5	83.5	83	83	83	82	82	82
H	Peak 2	None	None	None	None	None	None	None	None	None

## Sheet: Run Information
File Name	MeJA PEG.pcrd
Created By User	admin
Notes
ID
Run Started	08/04/2025 04:15:00 UTC
Run Ended	08/04/2025 05:20:47 UTC
Sample Vol	10
Lid Temp	105
Protocol File Name	Mei5Bio-2step.prcl
Plate Setup File Name	MeJA PEG.pltd
Base Serial Number	CT022697
Optical Head Serial Number	785BR15045
CFX Maestro Version	5.2.008.0222.
