# Supplementary material for: Genome-wide identification of SMALL AUXIN UP RNA (SAUR) gene family and its expression profiles in response to abiotic stress and auxin in tea plants ( Camellia sinensis )
Source: PeerJ journal article supplement (doi:10.7717/peerj.20681), 2026-01-30
Supplement: MIQE_Checklist_SAUR.docx [file MIQE_Checklist_SAUR.docx]

**MIQE Checklist**

**1. Plant materials and treatment methods**

Annual tea cuttings of *Camellia sinensis* were cultivated in the Tea Garden of Xinyang Normal University (32.13°N, 114.04°E). Healthy, pathogen-free tea seedlings with uniform growth were selected and subjected to diverse stresses:

① Programmed temperature acclimation (CK: 25/20°C (day/night) for 6 h, CA: cold 10/4°C for 6 h followed by 7-day adaptation, DA: 25/20°C for 7 days);

② Drought (20%W/V PEG6000), collected at 0h, 24h, 48h, and 72 h;

③ Salt (200 mM NaCl), sampled at 0h, 24h, 48h, and 72 h;

④ MeJA (1 mM MeJA, freshly prepared), sampled at 0h, 6h, 12h, and 24h;

⑤ Indole-3-acetic acid (100 µM IAA, freshly prepared) sampled at 0h, 3h, 6h, and 12h.

Each sample consists of tender leaves of *C. sinensis* collected from four plants.

All fresh plant samples were all flash-frozen in liquid N2 and stored at -80°C for further assays.

**2. Nucleic acid extraction and Reverse transcription**

**2.1 Nucleic acid extraction**

Grind frozen tender leaves into a flour-like powder in liquid N2 and weight 100 mg for RNA extraction.

Total RNA was isolated using RNAprep Pure Plant Plus Kit (Polysaccharides&Polyphenolics-rich) (catalog No. DP441, TIANGEN Biotech, Beijing, China) according to the manufacturer's instructions. RNase was not available in the operating environment, reagents and consumables. RNA integrity was verified by 1.0% agarose gel electrophoresis and RNA purity and concentration were measured using a Nanodrop 2000 spectrophotometer (Thermo Fisher Scientific, USA).

**2.2 Reverse transcription**

First strand cDNA from 1 μg of total RNA was carried out by the use of HiScript II 1st Strand cDNA Synthesis Kit (+gDNA wiper) (catalog No. R212, Vazyme Biotech Co.,Ltd, Nanjing, China) according to the manufacturer's protocol.

Briefly,

① Wipe genomic DNA at 42°C for 2 min;

1 × RT master mix (per 20-µL reaction)

| **Component** | **Volume/Reaction (µL)** |
| --- | --- |
| RNase-free dH2O | To 16 µL |
| 4 × gDNA wiper Mix | 4 µL |
| Oligo (dT) 23VN (50 μM) | 1 µL |
| Total RNA | 1 µg |

② Synthesize the first strand cDNA as follows.

1 × RT master mix (per 20-µL reaction)

| **Component** | **Volume/Reaction (µL)** |
| --- | --- |
| Reaction system ① | 16 µL |
| 10 × RT Mix | 2 µL |
| HiScript II Enzyme Mix | 2 µL |
| Total per Reaction | 20.0 |

Thermocycling conditions for RT reaction

|  | **Step 1** | **Step 2** | **Step 3** |
| --- | --- | --- | --- |
| Temperature | 50°C | 85°C | 4°C |
| Time | 15 min | 2 min | ∞ |

RT product was diluted 1:2 or 1:10 or 1:15 by ddH2O for qPCR analysis.

**3. qPCR target information and qPCR oligonucleotides**

Specific primers for the *CsSAUR* genes were designed using Primer-BLAST (<https://www.ncbi.nlm.nih.gov/tools/primer-blast/>). *CsGAPDH* and *Csβ-actin* served as the normalization reference genes. Primers were produced by GENERAL BIOL.

| **Gene symbol** | **Locus Name** | **Forward primer (5'->3')** | **Reverse primer (5'->3')** | **Product** |
| --- | --- | --- | --- | --- |
| *Csβ-actin* | CSS0008920 | GCCATCTTTGATTGGAATGG | GGTGCCACAACCTTGATCTT | 207 |
| *CsGAPDH* | CSS0050274 | TTGGCATCGTTGAGGGTCT | CAGTGGGAACACGGAAAGC | 210 |
| *CsSAUR7* | CSS0012504 | GTAGGAGGTTCGTAGTTCGCG | GAGTTACAGGACTCGGATCGG | 175 |
| *CsSAUR10* | CSS0035781 | GGGCATTTTGCAGTCTACGTG | CAACCCATCTCTCTGCTCGAA | 135 |
| *CsSAUR12* | CSS0016597 | GATCCGAATCGAAGACGCCA | AGCTTGATGAAGATCGGGTGG | 190 |
| *CsSAUR16* | CSS0047292 | GCTTTAATCTCCACCGTCCTC | ATTGCATGAACAGTGGGTGAT | 153 |
| *CsSAUR42*  *CsSAUR43* | CSS0040677  CSS0043205 | ACGACGACAACAGTGTCACC | AGCCAAACTCTTCTTCGGCA | 159 |
| *CsSAUR70*  *CsSAUR71* | CSS0047497  CSS0015721 | GTCAGCGCAGAGCTCCTAAA | AACTGACTCGTCACCGACAC | 159 |
| *CsSAUR73* | CSS0024285 | TTAGCAATCATGGTGGGGCA | TTGGAAGTGGCGAAACTCCT | 174 |
| *CsSAUR82* | CSS0036444 | GAGGACGTGAAAGAAGGGCA | GCTGCTAGCTCCAACAACCT | 122 |

**4. qPCR protocol and qPCR validation**

qPCR was performed on CFX96 Touch Real-Time PCR Detection System (Bio-Rad, USA) using ChamQ Universal SYBR qPCR Master Mix (catalog No. Q711, Vazyme Biotech Co.,Ltd, Nanjing, China).

qPCR master mix (per 20-µL reaction)

| **Component** | **Volume/Reaction (µL)** | **Final Concentration** |
| --- | --- | --- |
| Template cDNA | 2 µL | - |
| Forward primer (10µM) | 0.4 µL | 0.2 µM |
| Reverse primer (10µM) | 0.4 µL | 0.2 µM |
| 2 × ChamQ Universal SYBR qPCR Master Mix | 10 μL | 1 × |
| ddH2O | 7.2 μL | - |
| Total | 20 μL | - |

Thermocycling conditions for PCR reaction

| **Step** | **Temperature** | **Time** |
| --- | --- | --- |
| Initial denaturation | 95 ℃ | 30 sec |
| 40 cycles | 95 ℃ | 5 sec |
| 60 ℃ | 30 sec |

The dissolution curve procedure was set as: starting temperature is 65℃; final temperature is 95℃; holding time is 00:05; temperature increment is 0.5℃; the dissolution curves of all primers show single peak, indicating the specificity of the primer (Supplementary Raw Data of qPCR).

**5. Calibration curves and PCR efficiency**

The PCR amplification efficiency for each primer pair was determined using a standard curve generated from a 5-fold serial dilution of cDNA (1/5, 1/25, 1/125, and 1/625. The slope and correlation coefficient (R²) of each curve obtained Ct values were then used to calculate the PCR efficiency (E) using the formula E = (5(−1/slope) − 1) ×100%.


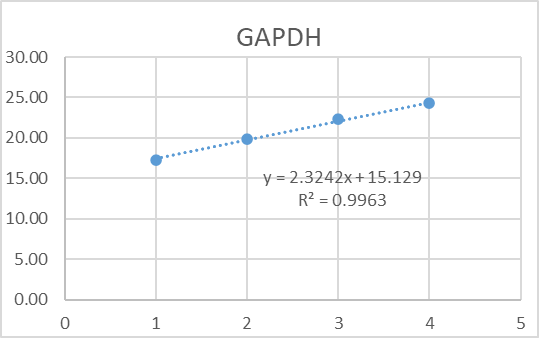

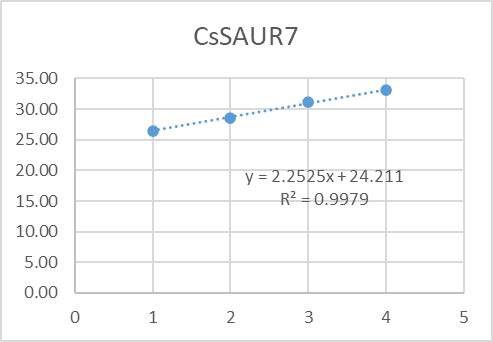


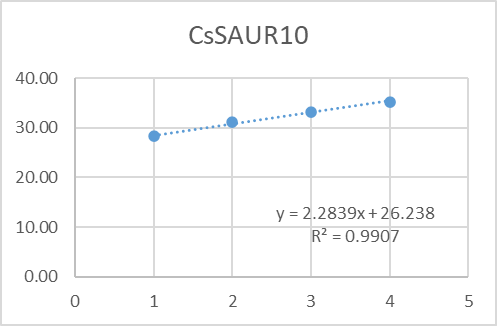

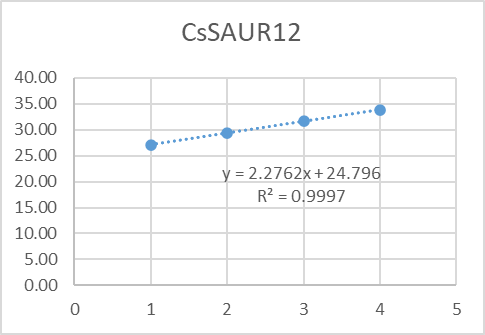


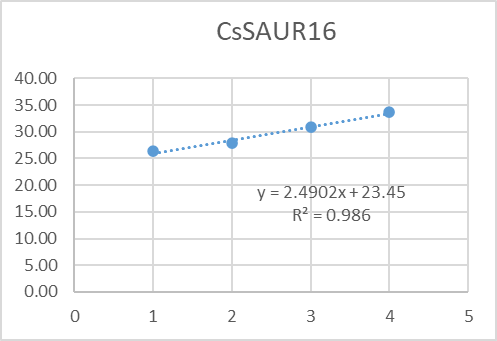

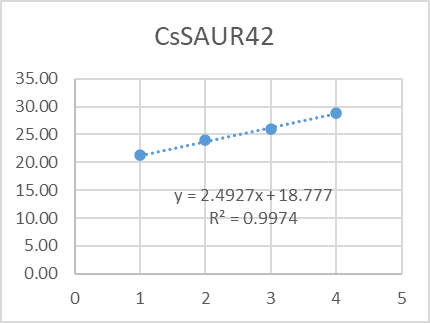


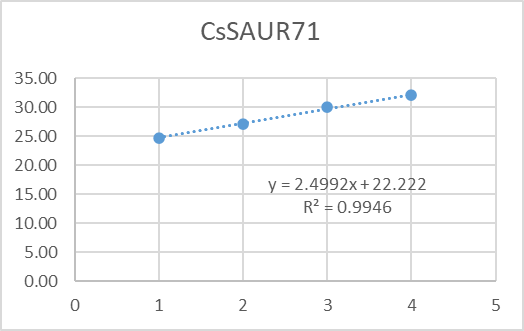

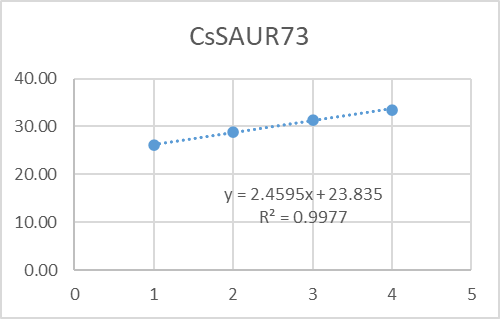


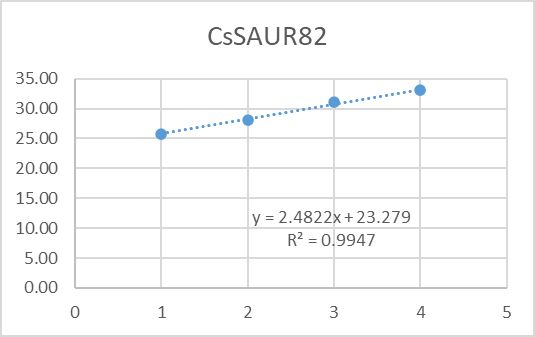


| Primer | R2 | Slope | E (%) |
| --- | --- | --- | --- |
| *CsGAPDH* | 0.9963 | 2.3242 | 99.86% |
| *CsSAUR7* | 0.9979 | 2.2525 | 104.32% |
| *CsSAUR10* | 0.9907 | 2.2839 | 102.3% |
| *CsSAUR12* | 0.9997 | 2.2762 | 102.8% |
| *CsSAUR16* | 0.986 | 2.4902 | 90.8% |
| *CsSAUR42* | 0.9974 | 2.4927 | 90.73% |
| *CsSAUR71* | 0.9946 | 2.4992 | 90.41% |
| *CsSAUR73* | 0.9977 | 2.4595 | 92.39% |
| *CsSAUR82* | 0.9947 | 2.4822 | 99.47% |

**6. Primer specifity**

**6.1 DNA gel electrophoresis (2% agarose gel)**


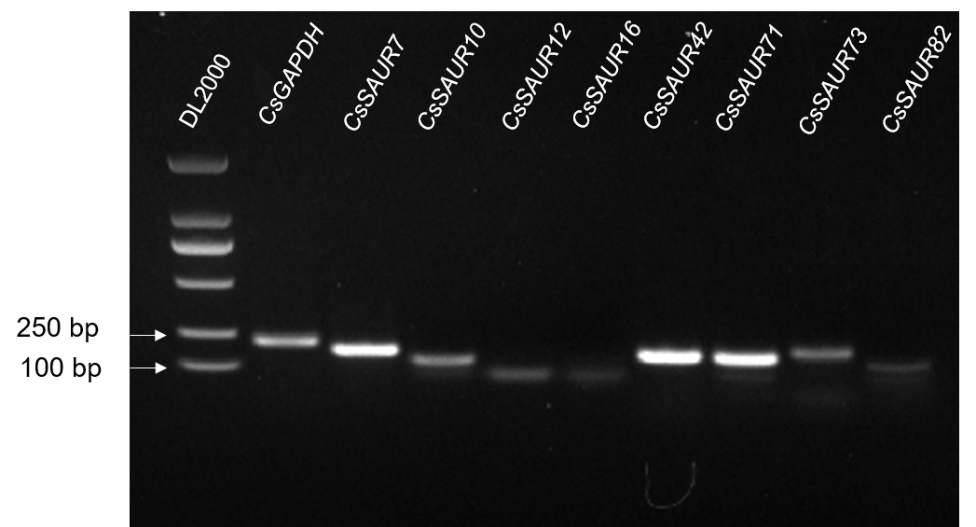


**6.2 Melt curve analysis**


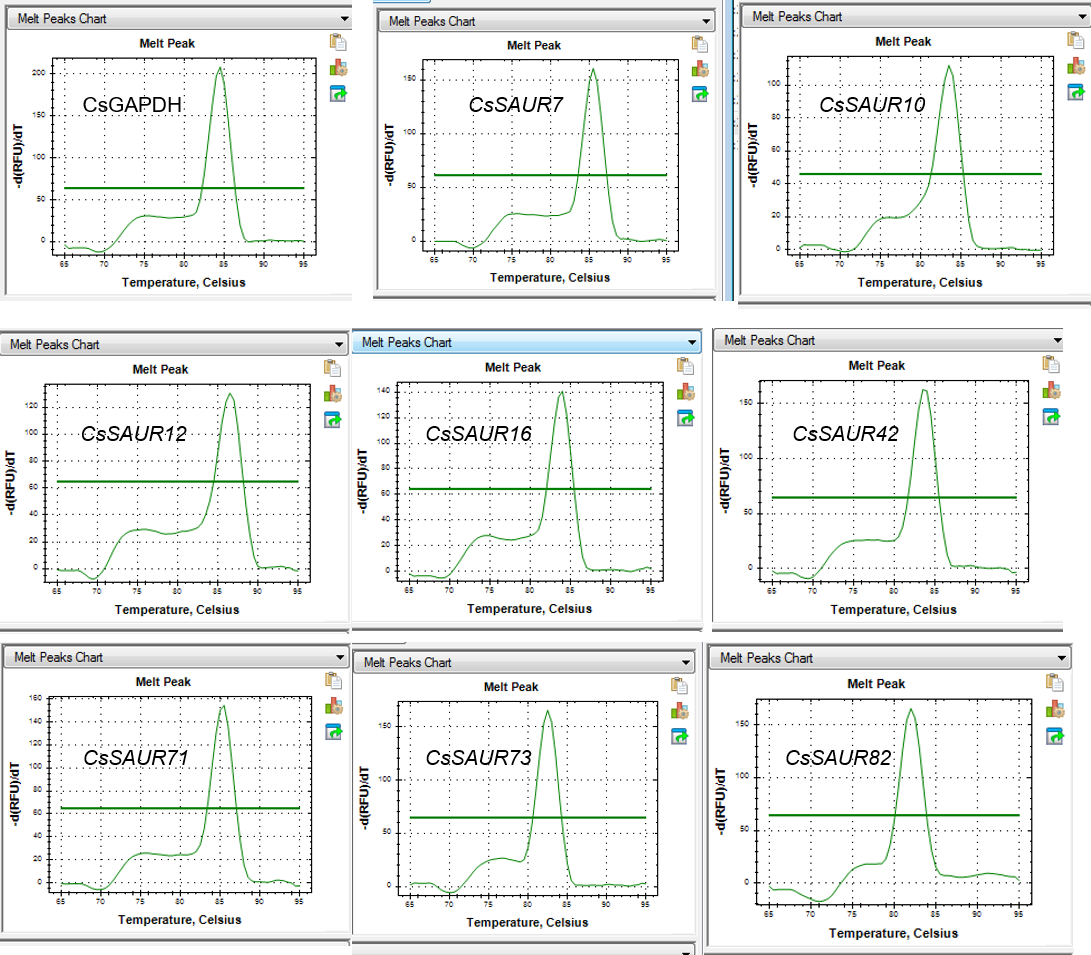


**7. Data analysis**

The Cq values were determined by the thresholding method, with results for each sample provided in supplementary Table S11. Relative quantification was calculated according to the 2-ΔΔCT method. The mean of *CsGAPDH* and *Csβ-actin* expression was used as a housekeeping control. Four experimental replicates were performed for each sample. Statistical differences were determined through one-way ANOVA followed by the Newman-Keuls test for multiple groups comparison, using GraphPad Prism software (10.4.1) (GraphPad Software, Inc., San Diego, CA).
