# Supplementary material for: Genome-wide identification of SMALL AUXIN UP RNA (SAUR) gene family and its expression profiles in response to abiotic stress and auxin in tea plants ( Camellia sinensis )
Source: PeerJ journal article supplement (doi:10.7717/peerj.20681), 2026-01-30
Supplement: NaCl_SAUR7_16_73_.xlsx [file NaCl_SAUR7_16_73_.xlsx]

## Sheet: Melt Curve Derivative Results
	Temperature	A1	A2	A3	A4	A5	A6	A7	A8	A9	B1	B2	B3	B4	B5	B6	B7	B8	B9	C1	C2	C3	C4	C5	C6	C7	C8	C9	D1	D2	D3	D4	D5	D6	D7	D8	D9	E1	E2	E3	E4	E5	E6	F1	F2	F3	F4	F5	F6
	65	0.375367	0.622645	-0.302328	0.891102	-0.145746	-0.831728	-0.148587	-0.518151	0.62161	-0.142304	-0.437604	0.134579	1.21525	-0.310967	-0.398064	-0.746895	0.312761	1.2659	0.633753	0.383614	1.25364	1.46615	0.721533	-0.220104	0.425554	0.0609126	1.17655	-0.255001	0.0589251	-1.16705	0.626394	0.844032	-0.200768	0.114033	-0.20109	0.645626	-0.110146	0.289065	0.31428	0.0285819	-0.0957296	-0.0731534	0.263367	1.80815	-0.456407	0.2717	0.365638	-1.51576
	65.5	0.813295	1.34906	-0.655045	1.93072	-0.315783	-1.80208	-0.321938	-1.12266	1.34682	-0.308325	-0.948142	0.291589	2.63304	-0.673762	-0.862471	-1.61827	0.67765	2.74278	1.37313	0.831164	2.71622	3.17667	1.56332	-0.476891	0.922034	0.131977	2.54919	-0.552503	0.127671	-2.52862	1.35719	1.82874	-0.434997	0.247072	-0.435696	1.39886	-0.23865	0.626307	0.680939	0.0619275	-0.207414	-0.158499	0.570629	3.91766	-0.988883	0.588683	0.792217	-3.28415
	66	0.750734	1.24529	-0.604657	1.7822	-0.291492	-1.66346	-0.297173	-1.0363	1.24322	-0.284608	-0.875208	0.269159	2.4305	-0.621934	-0.796128	-1.49379	0.625523	2.5318	1.26751	0.767229	2.50728	2.93231	1.44307	-0.440207	0.851109	0.121825	2.3531	-0.510002	0.11785	-2.33411	1.25279	1.68806	-0.401536	0.228066	-0.402181	1.29125	-0.220292	0.57813	0.628559	0.0571638	-0.191459	-0.146307	0.526734	3.6163	-0.912815	0.543399	0.731277	-3.03152
	66.5	0.750734	1.24529	-0.604657	1.7822	-0.291492	-1.66346	-0.297173	-1.0363	1.24322	-0.284608	-0.875208	0.269159	2.4305	-0.621934	-0.796128	-1.49379	0.625523	2.5318	1.26751	0.767229	2.50728	2.93231	1.44307	-0.440207	0.851109	0.121825	2.3531	-0.510002	0.11785	-2.33411	1.25279	1.68806	-0.401536	0.228066	-0.402181	1.29125	-0.220292	0.57813	0.628559	0.0571638	-0.191459	-0.146307	0.526734	3.6163	-0.912815	0.543399	0.731277	-3.03152
	67	0.750734	1.24529	-0.604657	1.7822	-0.291492	-1.66346	-0.297173	-1.0363	1.24322	-0.284608	-0.875208	0.269159	2.4305	-0.621934	-0.796128	-1.49379	0.625523	2.5318	1.26751	0.767229	2.50728	2.93231	1.44307	-0.440207	0.851109	0.121825	2.3531	-0.510002	0.11785	-2.33411	1.25279	1.68806	-0.401536	0.228066	-0.402181	1.29125	-0.220292	0.57813	0.628559	0.0571638	-0.191459	-0.146307	0.526734	3.6163	-0.912815	0.543399	0.731277	-3.03152
	67.5	0.772398	1.34033	-0.566786	1.84368	-0.255545	-1.49706	-0.296119	-1.01964	1.26654	-0.234709	-0.767024	0.406103	2.49608	-0.570281	-0.727924	-1.44452	0.746602	2.52672	1.34931	0.823695	2.58268	2.97116	1.50076	-0.384446	0.973052	0.198624	2.44534	-0.456957	0.218226	-2.27353	1.28654	1.75768	-0.261965	0.280143	-0.384991	1.39208	-0.1406	0.703328	0.745773	0.0410376	-0.257811	-0.111854	0.561995	3.71442	-0.861785	0.561213	0.782654	-2.89906
	68	0.745581	0.749401	-0.791199	1.46245	-0.450906	-2.59747	-0.287887	-1.08113	1.10793	-0.54323	-1.45568	-0.381387	2.08424	-0.890387	-1.15266	-1.73026	-0.0550159	2.67395	0.904147	0.451573	2.15704	2.73462	1.17449	-0.688682	0.224914	-0.182489	1.88016	-0.739647	-0.459162	-2.64837	1.0818	1.36725	-1.12061	-0.0593181	-0.483315	0.691468	-0.592199	-0.075399	0.0585238	0.154711	0.22129	-0.272717	0.355853	3.17357	-1.10372	0.443633	0.501385	-3.78116
	68.5	-0.227176	-0.319861	-1.23174	0.71887	-1.04619	-4.13877	-0.266727	-1.4947	0.887456	-1.12871	-2.6289	-2.45287	1.4032	-1.47095	-1.88062	-2.32132	-1.15794	2.01305	-0.470937	0.0202412	1.04301	2.26936	0.257543	-1.61386	-1.2761	-1.73693	0.784649	-1.66227	-1.24012	-3.4417	0.672282	0.320907	-2.90781	-0.392387	-0.696826	0.0634868	-1.74437	-1.52422	-1.57811	0.329149	0.619934	-0.960662	-0.126966	1.67331	-2.22178	0.291335	-0.403772	-4.98189
	69	-1.40264	-1.44881	-2.14033	0.265754	-1.80336	-4.88436	-1.27869	-2.39629	1.15717	-1.69485	-3.41873	-4.01043	0.441376	-2.21108	-3.01875	-3.81836	-1.75943	0.659335	-1.73795	-0.870769	-0.409213	1.76294	-0.371137	-2.53099	-2.49908	-3.23721	-0.377092	-2.62005	-1.91034	-3.57527	0.128305	-0.946158	-3.62255	-1.93344	-1.10554	-0.597891	-3.37771	-2.75227	-3.17562	-0.110487	0.254343	-2.21131	-0.620351	-0.65123	-3.33224	0.0872435	-0.840701	-5.3418
	69.5	-1.90999	-2.92275	-3.52016	-0.125013	-1.86695	-5.72567	-2.63291	-3.50252	0.703788	-2.05418	-3.95283	-5.08969	-0.682723	-2.6012	-3.7042	-5.20299	-2.49938	0.119883	-3.41576	-2.29837	-1.78387	0.882962	-0.896872	-3.57108	-3.1952	-4.06549	-1.76948	-3.63886	-3.08578	-3.13405	-0.0120251	-2.79537	-4.29665	-3.51741	-2.51977	-1.79919	-4.85273	-4.16775	-4.02934	-0.84504	-0.333958	-3.4792	-1.60363	-2.28623	-3.33813	0.0909354	-1.32299	-6.483
	70	-2.50777	-3.90932	-4.57709	-0.875904	-0.901437	-6.15474	-3.01568	-4.66489	-0.753606	-2.36078	-4.75528	-5.87019	-1.32367	-2.82828	-3.67478	-5.54034	-3.65922	-1.0684	-4.58404	-3.49703	-2.5369	-0.0739443	-1.86701	-4.78674	-3.55545	-4.61921	-2.70825	-4.42804	-4.67237	-3.24818	0.161029	-4.61718	-5.28577	-3.85884	-3.92569	-2.85564	-5.29714	-5.03848	-4.62776	-1.7355	-1.14038	-4.32309	-2.24492	-2.95888	-2.91886	-0.0631992	-2.10253	-7.10052
	70.5	-3.30825	-4.1932	-5.29752	-1.26417	0.420417	-5.23354	-3.50283	-5.61887	-2.27181	-2.80016	-5.31676	-6.28048	-2.08285	-3.44432	-3.92121	-6.52751	-4.44204	-2.53878	-5.21967	-4.43105	-2.70792	-0.621882	-2.27713	-5.2229	-3.98557	-5.59142	-3.12677	-4.50508	-5.77796	-3.67681	0.254554	-5.46844	-5.81644	-4.80766	-4.91386	-3.64164	-4.89296	-4.84051	-5.18401	-2.79347	-2.28715	-4.74085	-2.12318	-3.93122	-2.71826	-0.00132955	-2.53216	-6.21772
	71	-3.52184	-4.35561	-5.86666	-1.48331	2.30332	-3.67245	-4.31887	-6.25627	-3.40765	-2.77763	-4.72956	-6.22984	-2.73386	-3.44822	-3.56538	-7.54074	-4.83769	-2.37311	-5.56866	-5.37483	-2.14931	-0.960619	-1.65323	-4.6378	-3.76024	-6.14628	-3.89041	-4.45951	-6.5002	-3.71879	0.4645	-4.83816	-6.27124	-5.72485	-5.46854	-4.37801	-4.03603	-3.81171	-4.78234	-3.60836	-2.31439	-3.92004	-1.60988	-4.07727	-2.01062	0.127801	-2.38021	-5.01111
	71.5	-3.08047	-3.71433	-5.25348	-2.21712	4.25889	-2.13123	-3.78041	-5.59189	-4.39646	-2.39826	-3.2796	-5.13589	-2.57556	-2.66832	-1.98323	-6.74083	-4.64937	-2.10936	-5.0531	-5.05875	-0.895331	-1.42086	-0.766764	-3.00822	-3.10365	-5.09892	-4.26566	-3.82473	-7.04134	-3.19159	0.354573	-2.9164	-6.39045	-4.81924	-4.99636	-4.98497	-1.66088	-1.83781	-3.28293	-3.28258	-1.18175	-1.90304	-0.464786	-2.27297	-0.302733	-0.0957671	-1.59906	-3.60464
	72	-2.2056	-1.85883	-3.28323	-2.84079	5.99199	-0.265871	-2.01296	-3.62953	-4.16127	-1.70601	-1.31237	-2.91116	-2.34649	-1.45309	0.105017	-5.22715	-3.14313	-2.0567	-3.94981	-2.98417	0.958693	-1.30206	1.24291	-0.414044	-2.16751	-3.4084	-3.27311	-1.8282	-6.00913	-1.90364	0.643748	0.526472	-4.96491	-2.37333	-3.21245	-3.96486	1.97772	1.55489	-1.02909	-1.69823	-0.18247	0.802649	1.58015	0.209237	1.68184	0.451033	-0.357801	-0.79342
	72.5	-0.921241	0.445187	-0.566467	-1.93331	7.29926	2.26642	-0.271698	-1.03976	-2.31684	-0.373613	1.70393	0.241294	-2.06137	0.696086	2.0173	-3.74933	-1.24663	-1.49225	-2.30146	-0.125813	3.46289	-0.539811	4.08693	2.91856	0.131347	-0.957906	-1.55336	0.481297	-3.38995	0.840201	1.18192	4.24561	-2.64209	0.383398	-0.255228	-1.57029	5.44724	5.67226	1.93076	0.8836	1.23904	4.16293	4.34211	2.94418	4.07716	1.96118	1.44011	2.67347
	73	1.0774	3.69969	2.81957	-0.746948	8.2955	4.41056	2.09646	2.22947	0.292701	1.65391	5.72542	3.57726	-0.89395	3.57657	4.5913	-0.600312	1.54474	-0.268761	0.306271	3.11149	6.05346	0.188858	6.62292	5.8837	3.46164	2.701	0.367902	2.87121	-0.252238	4.39378	1.5195	7.24311	-0.0474435	3.68916	3.31425	1.31634	8.80284	9.79021	5.61168	4.48464	3.75103	7.57121	6.73744	7.01145	7.14462	4.1372	4.13326	6.02632
	73.5	4.20846	6.99165	6.27973	0.395102	9.10612	6.27703	5.36228	5.67771	3.00984	3.57597	8.84465	7.14837	0.484348	6.12882	7.21667	2.92239	4.91134	1.70833	3.76172	6.46275	8.41281	1.24535	8.80485	8.59758	6.39104	6.56684	2.81983	5.82865	3.08211	7.89568	2.2947	10.2439	3.48535	7.77919	6.83879	4.04309	12.2078	13.6266	8.89097	8.21281	5.82815	10.5361	8.98162	11.4021	10.3542	6.64127	7.18524	9.55853
	74	6.99229	9.46478	9.1378	2.33486	10.0359	8.83465	8.19404	8.69917	5.60871	5.51406	10.7136	10.0661	1.86706	8.15263	8.68469	5.62178	7.43514	4.49199	7.06587	9.75863	10.8765	3.32697	10.8387	10.8471	9.25387	9.77271	6.01537	8.50798	6.5049	10.9962	4.35403	12.6344	7.11604	11.4504	9.7247	7.67224	14.6387	16.6707	11.1079	11.6321	6.98482	12.8811	11.3316	14.8396	12.4917	9.67967	9.20804	12.8635
	74.5	9.09871	11.6892	11.0669	4.28284	10.7623	11.3396	10.218	11.2275	7.89312	7.47599	12.4248	11.8016	3.63219	10.2459	9.52279	8.49554	9.19368	6.70777	10.4929	12.6576	12.8076	5.73293	11.9705	11.9892	12.2745	12.6457	8.74436	10.2009	8.71403	12.8775	6.08752	13.4096	9.45459	13.5681	12.2258	10.6054	15.8985	18.4171	12.5444	14.2583	8.53601	14.5867	13.1097	17.7814	13.781	12.3019	11.319	15.1946
	75	11.4559	13.2491	12.1733	5.76237	11.2493	12.4805	12.2428	13.4061	9.59943	8.7053	13.3231	12.5079	5.38727	11.5237	10.1787	11.2197	11.397	8.90073	13.315	14.5534	13.8458	7.57795	12.761	12.5133	14.4008	14.2862	10.9509	11.9887	10.4234	13.7588	7.04437	13.8568	11.0744	15.0356	14.2343	11.8908	16.6109	19.5113	13.2589	15.6456	10.0369	15.7153	13.9383	19.8579	14.5621	14.0514	13.5099	16.3241
	75.5	13.3019	13.7502	12.5241	6.82164	11.7313	13.47	13.7383	14.6721	10.9966	9.45526	12.7717	13.0839	6.99447	11.7145	10.4297	12.8687	12.5527	11.1765	14.8824	15.7922	14.5607	9.48254	13.8014	13.3139	15.5445	15.0814	13.3531	13.3003	11.575	13.9674	8.70121	15.0278	12.6669	16.0804	15.3135	12.3112	17.0357	20.0633	13.123	16.4581	10.655	16.4754	14.8475	20.6508	14.2477	15.2074	14.5158	16.5486
	76	13.6556	14.1779	12.4137	7.86976	11.4189	13.8274	14.1977	15.5183	12.4785	10.3788	12.6288	13.2283	8.50919	11.8888	10.5837	14.0892	12.5733	12.0267	15.4397	17.1282	14.895	11.1351	14.2988	13.7296	16.5001	15.838	15.6674	13.7291	11.9653	13.7568	10.2095	14.9903	12.8299	15.9715	15.7429	13.0177	17.6214	19.8095	12.8044	16.8658	11.0047	16.764	15.3294	20.4516	13.6324	16.1516	14.5961	16.0307
	76.5	14.0263	14.6763	11.8633	8.47979	10.965	12.4764	14.4088	15.9339	13.8237	10.9998	13.3615	12.5638	9.4904	12.2104	10.8992	15.1202	12.9539	12.6111	15.574	17.4337	14.4252	11.945	14.2087	13.4732	17.2684	15.6898	16.6616	14.1756	12.5291	13.5782	10.7044	14.3652	12.0237	15.5212	16.1693	13.1926	18.0298	19.7715	12.8432	16.5416	11.3252	16.979	15.3366	20.0127	13.4102	16.3961	14.7279	15.5612
	77	14.6879	14.6339	11.437	8.95773	11.0263	11.1104	14.4995	15.7167	14.4403	11.2689	13.7268	11.9272	9.94802	12.0254	11.2371	15.2569	13.1704	14.264	15.4701	16.6507	13.9512	11.8618	14.0432	13.5922	17.4245	15.475	17.3808	14.4833	13.7029	13.6989	11.104	14.6386	11.6442	15.4824	16.2543	12.6896	18.3987	19.932	12.9319	16.2469	11.0248	16.9325	15.4137	19.4768	13.7248	16.1838	13.9463	15.1667
	77.5	14.5058	14.457	11.2376	9.27511	11.481	10.8777	14.1162	15.2715	14.5286	12.2855	13.8756	11.9433	10.4054	11.5519	11.7144	15.0421	12.7556	15.5783	15.3747	16.2978	13.9066	11.9387	13.3925	13.697	16.8999	16.0624	17.7441	14.1184	14.3009	13.6616	12.0281	14.6136	11.1438	15.313	15.8437	12.9988	18.9401	19.9899	13.2177	16.5013	10.6193	16.2991	15.6039	19.53	14.5417	16.1902	12.779	14.8247
	78	13.7854	14.4121	10.4755	9.71487	11.9642	10.6059	13.8229	15.0485	14.6009	12.9798	14.3485	11.9374	10.7307	11.406	11.9539	14.8353	12.4635	15.3916	15.2577	15.9534	13.799	12.2255	12.2434	13.4057	16.3308	16.5048	17.1026	13.5484	14.4885	13.8489	12.1921	13.8801	10.2248	14.9225	15.5213	13.7362	19.6174	20.4772	14.2643	16.3915	10.4994	15.6302	16.3003	19.836	15.6762	15.6305	12.3179	14.7037
	78.5	13.4369	14.2479	10.302	9.69341	12.8652	10.7977	13.7446	14.7856	14.0597	12.4991	14.647	11.8277	10.724	11.2314	12.197	14.3004	12.7618	15.12	14.8669	15.0847	13.4008	12.5886	12.0532	13.5879	15.8434	16.1952	16.229	13.423	14.5744	14.0207	12.0192	13.8356	10.4793	14.8427	15.0632	13.688	20.0069	21.4281	15.5725	16.4608	10.4618	15.4039	17.2892	20.7515	16.8019	14.9673	12.1918	14.7372
	79	13.2556	13.9201	10.8435	9.51126	13.6331	12.4509	13.6499	14.6387	13.1545	12.2324	14.4843	12.5361	10.6356	10.9713	12.8365	13.5031	12.9409	14.3621	14.5137	14.6671	13.4038	13.1551	12.7562	14.2351	14.967	15.8778	15.2958	13.2437	14.196	13.7906	11.9089	13.9814	11.6918	14.4085	14.5716	12.9408	20.7093	22.2294	17.4096	18.1399	11.7292	16.6546	18.5351	22.5008	18.2903	15.5368	13.2145	15.9836
	79.5	12.357	13.4622	11.0877	9.71474	14.3317	14.0579	13.3748	14.5414	13.0214	12.3343	14.0079	13.4305	10.7719	11.4437	13.8103	13.2863	12.8712	12.8408	13.8849	14.783	13.8122	14.271	13.8719	14.9738	14.3035	15.1188	14.2843	12.9511	13.4831	13.6668	12.2053	14.267	12.7508	13.9927	14.234	12.7408	22.5999	24.2842	20.0364	24.9831	18.4913	25.0497	20.7315	24.7766	19.7872	21.4866	19.6739	24.5852
	80	12.0036	13.1498	11.1798	10.0564	15.2522	15.7101	12.8937	14.2213	13.3367	11.707	13.4246	13.8024	11.2433	12.9254	15.2688	13.1249	12.7587	11.4023	13.1468	14.8648	13.937	15.651	16.3156	16.6905	14.5338	14.6145	13.9971	12.8797	12.4337	13.9552	13.0325	16.015	15.1576	14.3149	13.7155	12.449	26.0888	27.8545	23.5053	39.8684	30.766	42.2182	24.2974	28.1562	22.0849	34.7002	32.8259	41.5632
	80.5	12.5224	13.0077	12.1806	11.2273	17.0539	18.6372	12.644	14.24	13.2928	11.1053	13.2047	13.7065	12.6449	15.9735	18.8393	12.9234	12.8616	11.1909	12.7799	14.8577	13.8554	17.972	20.6991	20.4187	15.2616	14.7796	14.2021	13.163	11.8219	14.2709	15.072	19.7332	20.0435	15.0118	13.8509	12.2797	31.5914	33.3303	28.9143	58.1174	44.1205	61.8616	29.1631	34.5615	27.5403	51.379	48.5694	60.8645
	81	12.8545	13.0263	12.8382	16.2532	22.8289	25.8833	14.1513	16.1435	15.1815	11.6232	12.9854	13.6535	18.1074	23.1844	27.3753	15.602	14.698	14.072	13.1046	14.9997	14.2968	24.5865	28.6704	29.4191	18.4367	18.0162	17.1917	12.9736	11.9297	14.4705	21.3143	28.1862	29.1892	17.8867	17.346	15.154	41.256	44.2084	38.7345	75.3634	56.7978	80.3351	38.6776	46.0144	36.9109	67.9371	63.9212	79.7783
	81.5	12.9765	13.4228	12.7035	26.8153	33.954	38.9054	23.6445	26.0908	24.9193	12.238	12.5695	13.5946	29.4855	35.5811	40.7221	26.8262	23.8726	24.7352	13.626	15.1438	14.8971	37.3517	41.8645	43.9929	31.4952	31.1995	30.6132	12.7746	11.9213	14.3143	33.304	42.7998	43.4789	29.9158	29.5522	27.1006	55.7297	60.4133	51.0686	89.7257	66.8645	94.8625	52.5439	61.179	48.3431	81.6278	76.5158	95.1918
	82	14.0263	14.3228	13.4772	40.1472	46.6565	54.6517	42.4638	45.6456	42.0931	12.5595	12.7743	13.5166	43.7211	49.5393	55.3416	46.0168	41.0664	42.6885	14.1776	15.4557	15.0312	53.4963	57.1634	59.7922	53.7056	53.4798	52.3882	13.1741	12.0536	14.5222	47.3913	59.1565	59.3985	50.8522	50.5068	46.1822	70.713	76.7108	62.2878	92.7086	66.2791	95.0883	66.0244	76.7227	59.3714	83.9414	78.9014	95.4864
	82.5	15.7741	16.4297	15.6947	53.1918	58.5509	68.3733	63.9917	68.4494	61.1748	14.1661	14.8464	15.3186	57.1897	62.0236	68.6356	67.2336	60.4468	62.5676	16.0033	17.0351	16.8292	69.3537	70.4662	74.0541	77.2627	76.7503	74.985	14.3583	14.6257	16.7961	60.6452	73.442	72.5597	72.5655	73.9101	66.2429	82.3325	89.7604	71.004	78.5877	54.227	78.3777	77.189	89.0825	67.4512	71.4897	67.0523	78.7
	83	22.7259	24.0874	23.0739	63.9618	68.1153	78.1904	84.3774	89.7206	80.025	21.4874	22.6131	23.9884	68.11	71.0585	77.4868	87.8159	79.1416	81.4288	24.5466	26.2867	26.0699	82.1687	80.0011	83.5031	99.4197	98.3388	96.6978	21.3629	23.2099	26.0369	70.9998	83.5963	80.9259	93.2792	95.4529	85.4218	88.5668	97.1794	74.1593	57.3445	39.313	55.9194	83.7862	94.889	69.1871	52.4071	48.9246	56.8803
	83.5	38.769	40.2972	37.2924	67.8231	69.1727	78.9978	100.303	106.374	94.7689	35.1606	37.9712	39.3478	70.7994	71.0199	75.29	103.092	93.3325	94.1549	42.2094	44.5453	43.0424	85.1451	80.2149	80.3516	115.473	113.91	111.922	37.4602	39.5439	43.0403	72.2055	83.3398	78.7913	108.912	110.347	98.8715	85.1589	92.8149	67.3149	37.0466	24.4824	34.4775	79.9417	89.1861	62.1991	32.6559	31.5942	35.4091
	84	58.3057	60.084	53.8093	60.5581	59.4817	66.5279	99.649	106.53	94.4818	50.803	56.6326	56.1777	61.7169	59.8109	62.3278	101.026	91.7753	91.1495	63.2082	65.6478	61.5785	74.772	67.5037	65.345	112.264	110.068	107.491	56.7899	59.2163	62.2535	61.8829	69.985	64.8255	106.539	106.913	94.5081	70.3727	76.314	52.6852	18.1602	11.3245	15.7978	65.6082	72.8024	48.9396	14.8302	15.9803	16.0331
	84.5	76.9136	79.0084	68.5115	46.2587	44.7194	47.9579	80.6353	87.6372	77.9119	65.7282	74.4679	72.3123	46.4622	43.6212	45.418	81.6591	74.1794	73.0735	83.6168	85.9174	79.1809	56.6709	49.4198	46.8146	89.9413	87.8867	85.3277	74.881	77.901	79.5799	45.6777	51.1989	46.695	85.8103	85.3361	74.8899	50.773	55.2155	37.0888	5.51303	3.79899	4.35221	47.9821	52.2611	34.0139	3.62266	5.13488	4.59966
	85	93.2231	94.9919	79.7948	31.2801	29.4553	31.0692	56.7708	62.1921	56.1755	77.8917	88.7536	84.2388	30.5762	27.7809	28.3509	57.7442	52.4312	50.8685	101.023	102.675	92.6342	37.5683	32.0733	28.1353	63.1835	61.6839	59.6194	90.5818	92.8568	91.5403	28.9212	32.8028	29.5883	61.2075	59.1018	52.3975	32.451	34.8007	22.5924	1.71268	1.59418	1.4476	30.7471	32.8114	19.9819	-0.0586491	2.21961	2.05938
	85.5	97.4351	98.3104	79.2463	17.4635	14.9942	16.4089	34.0354	38.1494	34.7697	79.1075	90.4912	82.4917	16.0525	14.0327	13.8601	34.72	31.3156	29.4761	104.456	104.204	91.028	20.0558	15.8793	12.4319	37.6232	36.8238	35.0181	94.0647	95.0269	88.5279	14.344	16.3411	14.4533	37.3654	34.561	30.629	17.107	17.8436	10.855	1.56428	0.940241	1.89371	15.6494	16.8655	9.38765	-0.129148	2.47454	2.27999
	86	83.3492	83.6053	64.4499	6.68031	5.16665	5.48164	14.022	17.1857	15.8214	66.1809	76.1611	66.9945	5.91878	5.1056	5.48803	14.8301	12.6281	11.5196	88.4816	87.3994	73.4355	7.62043	4.82786	3.91619	15.9522	15.0878	13.5386	79.7388	80.0104	70.2158	4.96169	5.21849	5.0168	16.3259	13.9878	12.3773	6.63963	7.13278	4.39024	1.41533	1.12649	2.23192	6.12514	6.93898	3.21457	0.546768	1.568	2.407
	86.5	61.5183	61.1371	45.6641	1.66947	1.3444	1.61488	2.86746	4.24388	4.24593	48.1858	55.0884	47.7229	1.60539	2.18182	2.55033	3.69162	2.48002	1.88216	64.4747	64.1395	51.8919	2.56365	1.96252	1.56369	3.59286	3.06081	1.66802	57.922	58.1919	48.3278	1.41028	1.58954	1.98243	4.46078	2.99002	3.22424	2.5433	2.83502	2.40416	1.57301	0.933225	2.04961	2.52574	3.03656	0.525374	1.18648	0.892698	2.71956
	87	39.7841	38.955	28.3288	0.702542	0.487324	0.942804	1.01132	1.23612	0.902874	31.1827	34.647	28.8595	0.538376	1.76149	1.65508	1.34606	0.617235	0.392652	40.9927	41.1439	31.4185	1.75159	1.26324	1.23736	0.811994	0.863429	-0.229677	37.0691	37.2897	28.246	1.30571	1.10098	1.05378	1.32132	1.16585	1.85079	2.10889	1.86781	1.54867	1.09252	0.177248	1.5185	1.49879	1.97626	-0.0900851	1.50802	1.07398	2.75398
	87.5	18.9416	18.6909	12.9327	0.241577	0.294425	-0.514449	1.2392	1.83642	0.769551	15.5795	16.5723	12.4273	0.530533	1.67138	1.32377	1.67003	0.582459	1.07274	19.7681	20.1331	13.5792	1.08184	0.438352	1.36369	1.11363	0.988178	0.249115	18.2996	17.9391	11.4662	1.62279	0.737859	0.880362	0.706369	1.48661	1.84111	1.86006	1.89833	1.16805	0.662251	0.446653	1.16273	1.02779	1.26842	0.41288	1.63987	0.763609	2.09034
	88	4.75393	5.44383	3.53686	-0.0275556	0.878782	-1.48997	0.872971	1.90575	0.954364	4.81538	4.78727	3.47173	0.575449	1.40736	1.07664	1.55926	0.575819	1.11924	5.80032	6.80791	3.71523	0.701229	1.2242	1.29469	1.39022	0.530544	0.238142	5.56103	5.14036	2.43015	1.50644	1.11965	1.2743	0.475084	1.42159	1.64814	1.52039	1.53371	1.00939	1.16202	1.11399	1.20357	0.960508	0.74775	0.723605	1.66058	0.65896	1.45388
	88.5	0.330132	1.35598	1.60024	0.474296	1.35046	-1.1038	0.46963	1.51562	1.02038	1.5766	1.15263	1.12164	0.629806	1.28247	0.5226	0.719347	0.606503	1.25444	1.69188	3.1013	1.98085	1.08403	1.51058	1.38687	0.959969	0.619153	1.04717	1.66921	1.24885	1.14065	1.3809	1.52996	1.25535	0.160172	0.900998	0.718203	1.74363	1.26391	0.925087	1.35266	1.11291	0.634584	1.03015	0.507432	1.16845	1.59448	1.48515	1.2602
	89	0.0588094	1.15677	1.73581	0.798585	0.879963	-0.381775	-0.141676	1.48542	0.961592	1.27357	1.07234	0.767817	1.05391	0.973391	-0.325802	0.538822	0.765438	1.39889	1.78582	2.70338	1.73651	0.513246	0.346409	1.35618	0.676732	1.26173	1.67192	1.99902	1.07018	1.51062	1.07713	0.852981	0.824022	-0.300853	0.581997	0.161256	1.70149	1.48865	1.23882	1.07116	0.994678	0.0523702	0.917389	0.123515	1.91473	1.50088	1.68661	0.883624
	89.5	0.39285	1.08355	0.88965	0.512605	0.658583	-0.0997898	-0.606689	0.825554	1.34034	0.631595	1.03892	0.872904	1.64454	0.756519	-0.732882	1.20843	0.984645	0.813089	1.93376	2.52775	1.18878	-0.148672	0.223219	1.0748	1.06485	0.964147	1.25177	1.98986	0.705818	1.37737	0.48658	0.488142	0.950595	0.365129	0.64181	0.0272599	0.912118	1.06411	1.40089	1.98945	1.2174	0.478168	0.708495	0.0844195	1.84312	1.26065	1.22298	0.856232
	90	1.55087	0.703253	0.101352	0.385689	0.464428	0.658516	-0.328553	0.222875	1.42519	0.237169	0.559299	0.944363	2.0097	0.992043	-0.258117	1.53593	1.19516	0.174579	1.43017	2.48485	0.887129	0.491665	0.456784	1.40276	0.848549	0.755026	0.774755	1.44232	0.326072	0.981907	0.277903	1.0636	0.635794	0.90258	0.949549	0.252036	0.528452	0.498618	1.17796	2.83554	1.15762	1.12644	0.839133	0.679227	1.19562	1.09126	0.90103	1.6374
	90.5	2.11644	0.470151	0.239536	0.65819	0.363183	2.13421	0.390969	0.206062	1.04778	0.455971	0.216412	0.283641	1.95785	1.02556	-0.0745758	1.99075	1.46482	0.800573	0.572131	2.33534	0.545412	0.588838	-0.205403	1.66427	0.381647	1.60598	0.397718	1.43298	0.194676	0.777732	0.284905	0.811418	-0.0317467	0.994865	0.97977	0.650238	0.521348	0.762671	0.918733	1.93069	0.519967	1.00364	1.18902	0.531854	0.768129	0.918119	0.53666	2.05763
	91	1.74544	0.512175	0.261687	0.178384	0.492801	2.5292	1.10325	0.57313	0.849037	0.660425	0.268185	0.286947	1.69846	0.822446	-0.28282	2.83976	1.86899	1.30091	0.0704819	1.31878	-0.0536176	-0.00554736	-0.301006	1.29472	0.683686	1.89113	-0.144906	1.11383	0.572973	0.297856	0.0875888	0.699469	-0.243623	1.25143	0.985948	1.32296	0.167607	0.726604	0.705461	1.2315	0.230081	1.475	1.15788	0.253053	0.701076	0.850905	-0.00900531	1.97106
	91.5	1.35222	0.768406	0.0800022	-0.235158	0.515037	2.08011	1.8579	1.12467	0.781973	0.847441	0.76035	0.853726	1.18205	0.729853	0.693819	2.88394	1.62737	1.07853	-0.0487281	0.410704	0.166558	0.520965	0.213504	1.22906	1.42253	1.03314	-0.311375	0.693128	0.976133	0.206102	0.143612	1.65802	0.172219	1.63389	0.696789	1.52851	0.203337	0.201243	0.300628	1.76397	0.547918	2.30868	1.28011	0.960747	0.339151	0.857163	0.0913726	1.86415
	92	0.819649	1.44533	0.948248	0.459658	0.508753	2.16749	2.33886	1.64743	0.494501	0.740649	0.689664	0.583952	0.420826	1.02433	1.66185	2.11378	1.22235	1.64695	-0.177071	0.326858	0.734996	1.20579	0.769897	1.22036	1.47065	1.08347	0.36113	0.824253	1.17439	0.451007	0.209804	1.99933	0.313941	1.64186	0.204653	1.40358	0.669369	0.858685	0.129754	1.21195	1.00403	2.18856	1.44897	1.48077	0.372289	0.997863	0.437212	1.67787
	92.5	0.0950247	2.05503	1.87277	1.16623	0.896947	2.29178	1.98347	1.95415	0.573838	0.93279	0.614422	0.260602	-0.0652489	0.713619	1.54162	1.8079	0.888773	2.40575	0.287039	0.191621	0.605081	0.994574	1.12038	0.547214	1.38237	1.5764	0.761948	0.705469	1.59378	0.757777	0.509809	1.07406	0.510165	1.5941	-0.00545037	1.3596	0.715207	1.7989	0.135408	0.140037	1.17911	1.39938	0.848258	1.22369	0.89935	0.832861	0.653604	1.23082
	93	-0.0926196	2.33017	1.92201	1.4044	0.525025	1.74072	1.66504	1.55742	0.904623	1.3709	0.974805	0.356721	0.257569	0.650902	1.67563	1.55869	0.25351	1.91013	0.822876	0.0690814	0.678779	1.27018	1.48338	0.233325	1.5498	0.62002	1.00913	0.509205	1.75877	1.17613	0.812868	0.734672	1.48372	1.78488	0.0173761	1.12191	0.586396	1.77448	0.374248	0.902525	1.56901	0.758206	0.100379	1.71336	0.864057	0.994149	1.22521	1.45788
	93.5	-0.0467505	1.91502	2.1643	1.68075	0.00056733	2.30462	1.35014	0.97831	0.914536	1.85971	1.79494	0.903595	0.515399	0.598235	2.08658	1.23856	-0.978444	1.54666	2.19842	0.452418	1.08885	1.66179	1.39801	0.0607677	0.873013	-0.200809	0.563417	0.906022	1.04897	2.11047	1.46244	-0.395354	2.01924	1.58437	-0.0764479	1.17481	0.19801	1.57768	0.319871	1.05932	1.96742	0.779009	-0.698174	1.63255	0.571908	0.624972	1.12824	1.20294
	94	0.14143	1.70945	2.46154	2.19611	0.319837	3.0032	0.774163	0.593855	1.11839	2.27424	1.90718	0.530551	0.782642	0.434604	1.81893	1.50254	-1.57537	1.83143	2.98362	0.861276	1.07779	1.42408	1.32462	-0.354062	0.121946	0.0585221	0.199811	1.03508	0.566094	2.63505	2.03668	-1.66294	2.11873	1.53609	-0.0275408	1.11007	-0.0870977	2.05705	0.165231	0.479595	1.76988	0.0829405	-1.40635	0.937421	0.698672	0.161966	1.16946	1.1239
	94.5	-0.229821	0.287762	2.74135	1.62618	0.437015	5.11632	0.44932	0.519881	1.11901	3.67136	3.93806	2.12592	0.999397	-0.012093	1.36196	2.05348	-3.39672	2.05318	6.07589	0.450104	1.31157	1.06276	0.425785	-0.650665	-1.21601	-0.404114	-1.60755	1.26124	-0.580325	3.79391	3.60614	-4.17813	2.04545	0.892003	-0.362816	1.64949	-1.35058	1.13248	-0.411709	-0.554304	1.7749	1.12318	-2.86771	-0.662589	0.658639	-1.19006	0.161434	-0.199068
	95	-0.460078	-0.656197	1.26871	0.328265	0.195153	3.41916	0.172331	0.360222	0.32904	2.22021	2.89226	1.8725	0.323243	-0.184374	0.514893	1.11354	-2.42049	1.02646	4.26193	-0.0875195	0.814287	0.327979	-0.271992	-0.310352	-1.18592	-0.505247	-1.7105	0.757026	-0.919548	2.22267	2.32089	-2.91127	0.733612	0.0322793	-0.491266	0.915771	-1.16411	-0.103815	-0.539234	-0.68223	0.731546	1.28462	-1.81428	-1.10951	0.191614	-1.21684	-0.50314	-0.972898
[truncated: 12 more columns]

## Sheet: Melt Curve Plate View Results
		1	2	3	4	5	6	7	8	9	10	11	12
A	Content	Unkn	Unkn	Unkn	Unkn	Unkn	Unkn	Unkn	Unkn	Unkn
A	Sample
A	Peak 1	85.5	85.5	85	83.5	83.5	83.5	83.5	84	83.5
A	Peak 2	None	None	None	None	None	None	None	None	None
B	Content	Unkn	Unkn	Unkn	Unkn	Unkn	Unkn	Unkn	Unkn	Unkn
B	Sample
B	Peak 1	85.5	85.5	85	83.5	83.5	83	83.5	83.5	83.5
B	Peak 2	None	None	None	None	None	None	None	None	None
C	Content	Unkn	Unkn	Unkn	Unkn	Unkn	Unkn	Unkn	Unkn	Unkn
C	Sample
C	Peak 1	85.5	85.5	85	83.5	83.5	83	83.5	83.5	83.5
C	Peak 2	None	None	None	None	None	None	None	None	None
D	Content	Unkn	Unkn	Unkn	Unkn	Unkn	Unkn	Unkn	Unkn	Unkn
D	Sample
D	Peak 1	85.5	85.5	85	83.5	83	83	83.5	83.5	83.5
D	Peak 2	None	None	None	None	None	None	None	None	None
E	Content	Unkn	Unkn	Unkn	Unkn	Unkn	Unkn
E	Sample
E	Peak 1	83	83	83	82	81.5	82
E	Peak 2	None	None	None	None	None	None
F	Content	Unkn	Unkn	Unkn	Unkn	Unkn	Unkn
F	Sample
F	Peak 1	83	83	83	82	82	82
F	Peak 2	None	None	None	None	None	None
G	Content	Unkn	Unkn	Unkn	Unkn	Unkn	Unkn
G	Sample
G	Peak 1	83	83	83	82	82	82
G	Peak 2	None	None	None	None	None	None
H	Content	Unkn	Unkn	Unkn	Unkn	Unkn	Unkn
H	Sample
H	Peak 1	83	83	83	82	82	82
H	Peak 2	None	None	None	None	None	None

## Sheet: Melt Curve RFU Results
	Temperature	A1	A2	A3	A4	A5	A6	A7	A8	A9	B1	B2	B3	B4	B5	B6	B7	B8	B9	C1	C2	C3	C4	C5	C6	C7	C8	C9	D1	D2	D3	D4	D5	D6	D7	D8	D9	E1	E2	E3	E4	E5	E6	F1	F2	F3	F4	F5	F6
	65	2723.09	2732.97	2634.46	2572.31	2628.35	2714.48	2710.69	2730.14	2680.25	2646.26	2684.55	2674.54	2597.31	2605.93	2633.71	2736.88	2668.09	2679.57	2743.73	2765.98	2720.43	2658.04	2673.84	2649.06	2746.28	2731.09	2737.85	2700.29	2690.72	2684.01	2622.56	2668.61	2632.97	2728.11	2720.84	2703.99	2771.8	2838.78	2655.95	2707.16	2566.61	2677.61	2724.59	2789.17	2635.1	2652.02	2634.25	2740.17
	65.5	2722.71	2732.35	2634.76	2571.42	2628.5	2715.32	2710.84	2730.66	2679.63	2646.4	2684.99	2674.41	2596.1	2606.24	2634.1	2737.63	2667.78	2678.31	2743.1	2765.6	2719.18	2656.57	2673.12	2649.28	2745.86	2731.03	2736.68	2700.55	2690.66	2685.18	2621.94	2667.77	2633.17	2728	2721.04	2703.34	2771.91	2838.49	2655.64	2707.13	2566.71	2677.68	2724.33	2787.36	2635.56	2651.75	2633.89	2741.68
	66	2722.34	2731.73	2635.06	2570.53	2628.64	2716.15	2710.99	2731.18	2679.01	2646.54	2685.43	2674.27	2594.88	2606.55	2634.5	2738.38	2667.47	2677.04	2742.46	2765.22	2717.92	2655.1	2672.4	2649.5	2745.43	2730.97	2735.5	2700.8	2690.6	2686.34	2621.31	2666.92	2633.37	2727.89	2721.24	2702.7	2772.02	2838.2	2655.32	2707.1	2566.81	2677.75	2724.06	2785.55	2636.01	2651.48	2633.52	2743.2
	66.5	2721.96	2731.1	2635.36	2569.64	2628.79	2716.98	2711.14	2731.69	2678.39	2646.69	2685.86	2674.14	2593.67	2606.86	2634.9	2739.12	2667.15	2675.78	2741.83	2764.83	2716.67	2653.64	2671.68	2649.72	2745.01	2730.91	2734.32	2701.06	2690.54	2687.51	2620.69	2666.08	2633.57	2727.77	2721.44	2702.05	2772.13	2837.91	2655.01	2707.08	2566.9	2677.83	2723.8	2783.74	2636.47	2651.21	2633.16	2744.71
	67	2721.59	2730.48	2635.67	2568.75	2628.93	2717.81	2711.28	2732.21	2677.77	2646.83	2686.3	2674	2592.45	2607.17	2635.3	2739.87	2666.84	2674.51	2741.2	2764.45	2715.42	2652.17	2670.96	2649.94	2744.58	2730.85	2733.15	2701.31	2690.48	2688.68	2620.06	2665.23	2633.77	2727.66	2721.64	2701.4	2772.24	2837.62	2654.69	2707.05	2567	2677.9	2723.54	2781.93	2636.93	2650.94	2632.79	2746.23
	67.5	2721.21	2729.86	2635.97	2567.85	2629.08	2718.64	2711.43	2732.73	2677.15	2646.97	2686.74	2673.87	2591.23	2607.48	2635.7	2740.62	2666.53	2673.24	2740.56	2764.07	2714.16	2650.7	2670.23	2650.16	2744.15	2730.79	2731.97	2701.57	2690.43	2689.85	2619.43	2664.39	2633.97	2727.54	2721.85	2700.76	2772.35	2837.33	2654.38	2707.02	2567.09	2677.97	2723.27	2780.13	2637.38	2650.67	2632.43	2747.75
	68	2720.83	2729.23	2636.27	2566.96	2629.23	2719.47	2711.58	2733.25	2676.52	2647.11	2687.18	2673.74	2590.02	2607.79	2636.09	2741.36	2666.21	2671.98	2739.93	2763.68	2712.91	2649.24	2669.51	2650.38	2743.73	2730.73	2730.79	2701.82	2690.37	2691.01	2618.81	2663.55	2634.17	2727.43	2722.05	2700.11	2772.46	2837.04	2654.07	2706.99	2567.19	2678.05	2723.01	2778.32	2637.84	2650.39	2632.06	2749.26
	68.5	2720.59	2729.18	2636.8	2566.44	2629.59	2721.3	2711.74	2733.87	2676.04	2647.55	2688.26	2674.42	2589.2	2608.41	2636.9	2742.41	2666.63	2670.68	2739.79	2763.64	2712.11	2648.01	2669.14	2650.93	2744.03	2731.13	2730.17	2702.39	2690.91	2692.54	2618.38	2663.12	2635.21	2727.63	2722.35	2700.07	2773.05	2837.5	2654.46	2706.86	2566.89	2678.33	2722.96	2777.1	2638.6	2650.23	2632	2751.57
	69	2721.09	2729.58	2637.57	2566.21	2630.29	2723.52	2711.99	2734.81	2675.59	2648.24	2689.76	2676.14	2588.66	2609.28	2638.03	2743.8	2667.32	2670.05	2740.41	2763.73	2711.92	2646.99	2669.23	2652	2744.97	2732.47	2730.03	2703.5	2691.6	2694.37	2618.15	2663.27	2636.96	2727.98	2722.79	2700.06	2774.27	2838.55	2655.64	2706.74	2566.67	2679.09	2723.15	2776.75	2640.06	2650.11	2632.42	2754.15
	69.5	2721.91	2730.67	2639	2566.17	2631.29	2726.18	2713.06	2736.3	2674.99	2649.22	2691.65	2678.36	2588.77	2610.58	2639.86	2746.21	2668.4	2669.94	2741.57	2764.58	2712.5	2646.29	2669.5	2653.48	2746.46	2734.27	2730.57	2705.02	2692.89	2696.04	2618.2	2664.14	2638.82	2729.57	2723.59	2700.74	2776.4	2840.27	2657.53	2707.03	2566.68	2680.54	2723.64	2777.66	2641.79	2650.12	2632.85	2756.99
	70	2723.01	2732.43	2641.05	2566.38	2632	2729.17	2714.5	2738.32	2675.03	2650.29	2693.74	2681.17	2589.28	2611.86	2641.63	2748.88	2669.87	2670.01	2743.76	2766	2713.61	2646.11	2670.17	2655.59	2748.12	2736.49	2731.74	2707.1	2694.74	2697.57	2618.11	2666.06	2641.28	2731.35	2725.31	2701.85	2778.98	2842.63	2659.63	2707.62	2567.04	2682.5	2724.71	2778.91	2643.32	2650.03	2633.77	2760.55
	70.5	2724.44	2734.48	2643.53	2567	2632.11	2732.14	2716.08	2740.93	2675.76	2651.59	2696.36	2684.17	2590.1	2613.44	2643.54	2751.81	2672.01	2671.03	2746.07	2768.04	2714.94	2646.31	2671.28	2658.15	2750	2738.93	2733.21	2709.35	2697.5	2699.33	2618.04	2668.61	2644.04	2733.48	2727.45	2703.56	2781.56	2845.14	2662.13	2708.78	2567.84	2684.78	2725.77	2780.62	2644.71	2650.16	2634.9	2763.88
	71	2726.23	2736.58	2646.3	2567.62	2631.5	2734.3	2718.02	2743.88	2677.25	2653.02	2698.89	2687.37	2591.34	2615.22	2645.46	2755.39	2674.24	2672.34	2748.91	2770.41	2716.2	2646.7	2672.3	2660.64	2752.01	2742.01	2734.89	2711.56	2700.46	2701.19	2617.85	2671.29	2647.08	2736.12	2730.15	2705.47	2783.77	2847.33	2664.66	2710.36	2569.17	2687.06	2726.75	2782.7	2645.96	2650.02	2636.21	2766.7
	71.5	2727.86	2738.7	2649.21	2568.54	2629.8	2735.8	2720.21	2746.99	2679.12	2654.31	2700.94	2690.23	2592.73	2616.77	2646.93	2759.11	2676.75	2673.36	2751.51	2773.22	2716.97	2647.27	2672.86	2662.62	2753.69	2744.85	2737.03	2713.71	2703.94	2702.96	2617.61	2673.23	2650.24	2738.94	2732.76	2707.89	2785.37	2848.79	2666.74	2712.21	2569.99	2688.51	2727.27	2784.42	2646.58	2650.06	2637.18	2768.84
	72	2729.23	2740.11	2651.35	2569.81	2627.28	2736.37	2721.62	2749.27	2681.45	2655.36	2702.07	2692.32	2593.89	2617.8	2647.36	2762.01	2678.7	2674.46	2753.86	2775.21	2716.99	2648.04	2672.9	2663.5	2755.04	2746.98	2738.96	2715.2	2707.26	2704.25	2617.44	2673.99	2653.25	2740.71	2734.93	2710.22	2785.24	2848.95	2667.82	2713.44	2570.34	2688.84	2727.08	2784.85	2646.2	2650.01	2637.73	2770.11
	72.5	2729.99	2740.47	2652.36	2571.18	2623.87	2735.98	2722.19	2750.5	2683.04	2655.91	2702.1	2693	2595.05	2618.09	2646.83	2764.3	2679.8	2675.34	2755.36	2776.06	2715.92	2648.48	2671.5	2662.93	2755.66	2748.13	2740.18	2715.47	2709.71	2704.65	2616.93	2672.65	2655.06	2741.24	2735.78	2711.64	2783.39	2847.12	2667.65	2713.74	2570.1	2687.61	2725.59	2784.14	2644.83	2649.46	2637.44	2769.52
	73	2730.04	2739.54	2651.81	2571.68	2620.03	2734.15	2721.8	2750.2	2683.64	2655.63	2700.23	2692.04	2595.83	2617	2645.26	2765.53	2679.81	2675.85	2756.02	2775.26	2713.51	2648.56	2668.84	2660.62	2754.76	2747.77	2740.46	2714.69	2710.56	2703.28	2616.27	2669.83	2655.82	2740.23	2735.09	2711.7	2779.81	2843.27	2665.79	2712.41	2568.96	2684.66	2722.77	2781.72	2642.03	2647.94	2636.16	2767.43
	73.5	2728.76	2736.76	2649.53	2571.91	2615.6	2731.6	2719.97	2748.24	2682.72	2654.26	2696.49	2689.4	2595.9	2614.55	2642.24	2764.84	2678.18	2675.49	2754.93	2772.93	2709.89	2648.23	2664.93	2657.09	2752.23	2745.39	2739.73	2712.53	2709.93	2700.25	2615.34	2665.43	2654.98	2737.45	2732.47	2710.32	2774.6	2837.38	2662.1	2709.23	2566.4	2680.11	2718.88	2777.08	2637.67	2645.26	2633.26	2763.48
	74	2725.86	2732.65	2645.63	2571.18	2610.91	2727.79	2716.49	2744.58	2680.65	2652.06	2691.56	2684.99	2595.34	2610.95	2638.2	2762.71	2675.01	2674.03	2752.26	2768.81	2705.1	2647.17	2660.08	2652.1	2748.38	2741.29	2737.55	2708.9	2707.48	2695.46	2613.81	2659.69	2652.33	2732.52	2728.34	2707.56	2767.75	2829.77	2657.05	2704.25	2563.25	2674.23	2713.79	2770.45	2631.83	2641.23	2629.1	2757.92
	74.5	2721.85	2727.35	2640.54	2569.57	2605.59	2722.78	2711.89	2739.62	2677.16	2648.76	2685.83	2679.51	2593.98	2606.41	2633.66	2759.21	2670.85	2671.06	2747.86	2763.24	2699.1	2644.86	2654.21	2646.4	2742.97	2735.69	2733.77	2704.15	2703.59	2689.44	2611.01	2653.02	2648.04	2726.21	2722.82	2702.75	2760.14	2820.9	2651.12	2697.73	2559.39	2667.33	2707.63	2762.34	2625.32	2635.64	2624.06	2750.77
	75	2716.76	2721.07	2634.69	2566.96	2600.19	2716.63	2706.29	2733.43	2672.84	2644.68	2679.27	2673.35	2591.7	2600.82	2628.72	2754.25	2665.79	2667.33	2741.86	2756.3	2692.42	2641.51	2648.16	2640.21	2736.24	2728.82	2728.87	2698.71	2698.86	2682.74	2607.82	2646.34	2642.99	2719.07	2716.2	2697.19	2751.95	2811.48	2644.63	2690.17	2554.73	2659.73	2700.81	2752.81	2618.15	2629.06	2617.79	2742.91
	75.5	2710.48	2714.25	2628.49	2563.87	2594.36	2710.36	2699.74	2726.35	2667.61	2640.12	2672.7	2667.05	2588.62	2595.04	2623.54	2748.14	2659.6	2662.17	2734.74	2748.79	2685.32	2637.29	2641.44	2633.87	2728.72	2721.54	2722.81	2692.24	2693.26	2675.79	2603.9	2639.1	2637.01	2711.27	2708.73	2691	2743.57	2801.49	2637.99	2682.19	2549.47	2651.68	2693.71	2742.68	2610.91	2621.68	2610.72	2734.59
	76	2703.65	2707.35	2622.25	2560.16	2588.56	2703.28	2692.7	2718.83	2661.84	2635.22	2666.46	2660.33	2584.73	2589.13	2618.31	2741.46	2653.4	2656.34	2727.14	2740.53	2677.93	2632.07	2634.44	2626.95	2720.74	2713.77	2715.55	2685.54	2687.39	2668.84	2599.14	2631.47	2630.53	2703.16	2700.99	2684.87	2734.9	2791.52	2631.54	2673.79	2544.13	2643.33	2686.03	2732.31	2603.95	2613.9	2603.41	2726.48
	76.5	2696.85	2700.08	2616.14	2556.06	2582.97	2696.76	2685.59	2710.91	2655.16	2629.79	2659.96	2653.93	2580.19	2583.14	2612.94	2734.1	2647.01	2650.19	2719.37	2731.81	2670.53	2626.28	2627.23	2620.23	2712.26	2705.82	2707.32	2678.52	2681.27	2662.03	2593.82	2624.19	2624.32	2695.35	2693	2678.05	2725.97	2781.66	2625.14	2665.42	2538.48	2634.94	2678.45	2722.28	2597.23	2605.63	2596.15	2718.57
	77	2689.61	2692.75	2610.38	2551.71	2577.53	2690.81	2678.32	2702.99	2648.13	2624.26	2653.13	2647.77	2575.32	2576.99	2607.4	2726.46	2640.47	2643.61	2711.61	2723.25	2663.51	2620.25	2620.26	2613.44	2703.57	2698.1	2698.96	2671.39	2674.79	2655.23	2588.46	2617	2618.47	2687.59	2684.88	2671.76	2716.88	2771.72	2618.68	2657.25	2532.89	2626.39	2670.69	2712.31	2590.46	2597.57	2588.81	2710.9
	77.5	2682.27	2685.47	2604.68	2547.13	2571.88	2685.51	2671.15	2695.23	2640.81	2618.43	2646.27	2641.92	2570.25	2571.16	2601.69	2718.9	2633.92	2635.98	2703.91	2715.13	2656.53	2614.41	2613.25	2606.64	2694.93	2690.25	2690.01	2664.13	2667.64	2648.35	2582.66	2609.59	2612.69	2679.89	2676.82	2665.27	2707.55	2761.73	2612.17	2649.11	2527.48	2618.09	2663.01	2702.72	2583.42	2589.44	2582.25	2703.39
	78	2675.18	2678.28	2599.2	2542.43	2566.03	2679.91	2664.2	2687.7	2633.62	2612.02	2639.22	2635.82	2564.94	2565.4	2595.71	2711.43	2627.7	2628.23	2696.24	2706.95	2649.61	2608.29	2606.92	2599.79	2686.68	2682.05	2681.35	2657.3	2660.55	2641.54	2576.53	2602.47	2607.36	2672.3	2669.03	2658.71	2697.92	2751.67	2605.36	2640.78	2522.23	2610.1	2655.01	2692.73	2575.86	2581.45	2575.94	2696.04
	78.5	2668.45	2671.07	2594.13	2537.47	2559.86	2674.81	2657.3	2680.18	2626.29	2605.61	2631.94	2629.98	2559.57	2559.75	2589.73	2704.11	2621.38	2620.63	2688.69	2699.23	2642.76	2602.16	2600.88	2593.17	2678.6	2673.84	2672.95	2650.53	2653.18	2634.5	2570.53	2595.62	2602.31	2664.93	2661.31	2651.63	2687.96	2741.18	2597.85	2632.66	2516.93	2602.36	2646.66	2682.79	2567.74	2573.8	2569.85	2688.63
	79	2661.73	2664.05	2588.8	2532.75	2553.17	2668.92	2650.46	2672.9	2619.6	2599.51	2624.64	2623.89	2554.22	2554.16	2583.46	2697.16	2614.95	2613.19	2681.38	2691.81	2636.16	2595.66	2594.73	2586.13	2670.89	2665.88	2665.14	2643.88	2646.05	2627.57	2564.5	2588.6	2596.74	2657.5	2653.97	2645.11	2677.85	2730.23	2589.7	2624	2511.49	2594.36	2637.67	2671.84	2559.01	2566.22	2563.49	2681.01
	79.5	2655.27	2657.17	2583.31	2527.91	2546.23	2662.34	2643.68	2665.53	2613.04	2593.34	2617.51	2617.42	2548.9	2548.66	2576.83	2690.54	2608.47	2606.37	2674.21	2684.49	2629.3	2588.93	2588.03	2578.9	2663.6	2658.02	2657.65	2637.3	2639.04	2620.7	2558.55	2581.59	2590.59	2650.51	2646.72	2638.63	2667.06	2718.76	2580.31	2613.69	2504.38	2584.61	2627.97	2660.18	2549.42	2557.42	2555.8	2671.53
	80	2649.3	2650.57	2577.72	2522.99	2538.79	2654.82	2637.1	2658.37	2606.51	2587.26	2610.65	2610.53	2543.38	2542.54	2569.53	2683.85	2602.08	2600.32	2667.5	2677.02	2622.38	2581.32	2580.64	2570.98	2656.45	2650.71	2650.74	2630.9	2632.61	2613.85	2552.19	2574.09	2583.76	2643.4	2639.74	2632.37	2654.98	2705.69	2569.49	2597.84	2492.18	2568.02	2616.71	2646.85	2539.06	2543.65	2542.82	2655.18
	80.5	2643.15	2643.99	2572.02	2517.67	2530.79	2646.38	2630.71	2651.22	2599.69	2581.62	2604.04	2603.69	2537.45	2535.44	2561.19	2677.35	2595.64	2594.74	2661	2669.64	2615.39	2573.06	2571.37	2561.83	2648.92	2643.24	2643.51	2624.38	2626.55	2606.74	2545.27	2565.21	2575.01	2636.08	2632.85	2626.1	2640.61	2690.54	2556.46	2573.27	2473.39	2541.94	2603.39	2631.52	2526.84	2522.15	2522.53	2629.53
	81	2636.78	2637.53	2565.58	2511.16	2521.12	2635.5	2624.08	2643.73	2592.83	2576.01	2597.44	2596.82	2530.09	2525.91	2549.94	2670.4	2588.85	2588.57	2654.63	2662.14	2608.46	2562.67	2559.35	2549.75	2640.68	2635.34	2635.98	2617.79	2620.69	2599.59	2536.45	2553.61	2563.04	2627.93	2625.28	2619.53	2622.74	2671.54	2539.94	2539.86	2448.19	2506.35	2586.85	2611.53	2510.93	2492.29	2494.31	2594.4
	81.5	2630.31	2630.9	2559.27	2500.59	2507.18	2619.64	2615.34	2633.85	2583.34	2569.96	2591.06	2590.03	2518.46	2511.49	2533.09	2660.46	2579.83	2579.49	2647.86	2654.63	2601.07	2547.56	2541.93	2531.59	2629.01	2623.74	2624.79	2611.4	2614.61	2592.3	2523.11	2536.12	2545.06	2616.83	2614.17	2609.61	2598.66	2645.55	2517.35	2498.51	2417.13	2462.4	2564.09	2584.94	2489.61	2454.8	2459.16	2550.49
	82	2623.67	2624.01	2552.74	2483.9	2486.88	2596.19	2599.05	2616.21	2566.79	2563.77	2584.75	2583.18	2500.15	2490.07	2508.99	2642.37	2563.79	2562.73	2640.95	2646.94	2593.57	2524.78	2517.16	2505.54	2607.82	2602.79	2604.11	2604.91	2608.69	2585.19	2502.8	2510.52	2519.31	2596.7	2594.42	2591.34	2566.92	2611.08	2489.02	2451.94	2382.93	2413.69	2534.33	2550.3	2462.66	2412.43	2419.4	2501.51
	82.5	2616.07	2616.3	2545.49	2460.48	2460.65	2565.28	2572.39	2587.65	2540.87	2557.14	2577.93	2576.14	2474.84	2462.18	2477.98	2614.06	2538.36	2536.45	2633.38	2638.86	2585.69	2494.1	2485.06	2472.07	2575	2570	2572.17	2598	2602.12	2577.38	2475.85	2477.28	2486.08	2565.74	2563.24	2563.19	2528.47	2569.37	2455.51	2408.32	2352.56	2369.83	2498.46	2508.75	2430.74	2373.07	2382.37	2457.54
	83	2607.05	2606.69	2536.23	2431.13	2428.8	2528.52	2535.26	2548	2505.7	2548.74	2569.01	2566.83	2443.46	2428.69	2441.15	2575.29	2503.49	2500.39	2623.91	2628.74	2575.63	2456.01	2447.39	2432.36	2530.84	2526.36	2529.35	2589.63	2593.12	2567.33	2442.71	2437.84	2447.61	2524.36	2520.84	2525.31	2485.52	2522.32	2418.96	2374.56	2329.28	2336.34	2457.96	2462.32	2396.23	2342.07	2353.4	2423.76
	83.5	2592.03	2590.96	2521.42	2397.64	2393.85	2488.55	2488.91	2498.85	2461.66	2534.7	2554.19	2551.15	2408.05	2392.55	2402.18	2527.26	2460.1	2456.11	2607.5	2611.24	2558.47	2413.49	2406.56	2390.48	2476.75	2472.82	2476.68	2575.32	2577.76	2550.19	2406.28	2395.33	2406.8	2473.47	2469.01	2478.84	2441.44	2474.02	2382.87	2350.97	2313.27	2313.85	2416.28	2415.64	2362.9	2320.84	2333.44	2400.69
	84	2567.69	2565.8	2498.56	2364.98	2361.25	2451.49	2437.48	2444.16	2413.21	2513.23	2530.5	2527.2	2374.42	2359.34	2367.51	2474.82	2412.53	2408.62	2581.12	2583.69	2532.27	2372.88	2369.09	2353.81	2418.28	2415.37	2420.37	2551.62	2553.03	2523.9	2372.25	2356.46	2370.59	2418.16	2413.28	2429.09	2402.08	2431.35	2352.83	2337.21	2304.49	2301.37	2379.61	2374.78	2335.02	2309.07	2321.49	2387.94
	84.5	2533.83	2530.99	2467.87	2338.2	2335.23	2423.01	2391.99	2395.16	2369.62	2484.02	2497.68	2495.13	2347.34	2333.57	2340.56	2428.83	2370.73	2367.24	2544.37	2545.72	2497.08	2339.97	2339.96	2325.8	2367.35	2365.52	2371.87	2518.68	2518.69	2488.25	2345.37	2326.27	2342.71	2369.66	2364.82	2386.65	2371.87	2398.5	2330.43	2331.82	2301.1	2296.93	2351.28	2343.55	2314.27	2305	2316.68	2383.44
	85	2491.32	2487.43	2430.74	2318.92	2316.68	2403.4	2357.78	2357.69	2336.26	2448.08	2456.73	2455.69	2328.14	2315.74	2322.14	2394.05	2339.17	2336.34	2498.17	2498.52	2453.91	2316.46	2319.66	2307.04	2329.23	2328.31	2335.81	2477.3	2475.86	2445.32	2326.72	2305.28	2323.82	2333.17	2328.84	2354.84	2351.18	2376.08	2315.58	2330.39	2299.88	2295.73	2331.6	2322.4	2300.87	2304.3	2315.2	2382.01
	85.5	2442.53	2438	2389.91	2306.73	2305.6	2391.57	2335.13	2332.87	2313.46	2407.83	2410.88	2412.96	2316.53	2305.44	2311.78	2371.01	2318.26	2316.3	2445.54	2445.39	2406.72	2302.13	2307.64	2297.16	2304.04	2303.69	2312.13	2430.03	2427.84	2398.99	2316.09	2293.12	2312.75	2308.4	2305.53	2334.17	2338.93	2363.14	2307.38	2329.48	2299.2	2294.9	2320.15	2310.17	2293.76	2304.44	2313.93	2380.87
	86	2396.58	2391.78	2353.6	2300.95	2300.97	2386.35	2323.23	2318.98	2301.04	2371.06	2368.64	2375.26	2311.4	2300.95	2307.36	2358.76	2307.39	2306.26	2396.58	2397.04	2365.27	2295.6	2302.96	2293.53	2290.93	2290.9	2300.2	2385.86	2383.38	2359.08	2311.56	2288.09	2308.48	2295.28	2293.58	2323.59	2333.29	2357.26	2303.92	2328.75	2298.8	2293.79	2315.1	2304.6	2290.79	2304.26	2312.8	2379.68
	86.5	2360.5	2355.71	2326.2	2299.19	2299.53	2385.06	2319.76	2314.43	2296.51	2342.54	2335.86	2346.69	2309.73	2299.43	2305.45	2354.85	2304.35	2303.51	2358.42	2359.14	2334.07	2293.4	2301.63	2292.29	2286.66	2287.13	2297.13	2351.55	2349	2329.48	2310.23	2286.79	2306.77	2290.69	2290.09	2320.43	2331.32	2355.01	2302.3	2328.03	2298.11	2292.73	2313.12	2302.3	2289.98	2303.88	2312.33	2378.44
	87	2335.19	2330.73	2307.8	2298.65	2299.12	2384.21	2318.97	2313.26	2295.55	2322.83	2313.56	2327.53	2309.25	2298.33	2304.43	2353.74	2303.66	2303.15	2332.16	2332.97	2313.28	2292.35	2300.57	2291.58	2285.89	2286.36	2297.05	2327.93	2325.18	2310.54	2309.6	2285.96	2306.1	2289.49	2289.2	2319.18	2330.15	2353.86	2301.28	2327.25	2297.92	2291.79	2312.12	2301.07	2289.91	2303.12	2311.8	2377
	87.5	2320.49	2316.38	2297.5	2298.34	2298.88	2384.14	2318.32	2312.55	2295.04	2311.07	2300.8	2317.38	2308.99	2297.58	2303.67	2353.01	2303.34	2302.7	2317.01	2317.61	2302.16	2291.54	2300.31	2290.95	2285.27	2285.8	2296.88	2314.1	2311.39	2300.64	2308.81	2285.59	2305.56	2288.88	2288.48	2318.26	2329.11	2352.95	2300.65	2326.92	2297.8	2291.19	2311.49	2300.21	2289.88	2302.4	2311.3	2375.77
	88	2315.2	2310.94	2293.93	2298.35	2298.71	2384.64	2317.76	2311.42	2294.67	2306.47	2296	2313.98	2308.68	2296.67	2303.09	2352.07	2303.02	2302.1	2311.25	2311.65	2298.49	2291.21	2299.93	2290.22	2284.71	2285.38	2296.78	2308.66	2306.22	2297.89	2308.01	2285.12	2305.13	2288.67	2287.72	2317.33	2328.28	2351.99	2300.07	2326.47	2297.42	2290.58	2311.02	2299.76	2289.5	2301.5	2311.01	2374.91
	88.5	2314.29	2309.58	2292.86	2298.26	2298.02	2385.44	2317.46	2310.7	2294.08	2305.16	2294.79	2312.9	2308.4	2296.16	2302.64	2351.53	2302.75	2301.57	2309.75	2309.38	2297.23	2290.75	2299.14	2289.64	2283.96	2285.19	2296.54	2307.22	2304.92	2297.05	2307.31	2284.47	2304.34	2288.4	2287.11	2316.7	2327.53	2351.4	2299.62	2325.79	2296.77	2290.06	2310.51	2299.43	2289.14	2300.76	2310.53	2374.27
	89	2314.15	2308.92	2291.94	2297.9	2297.48	2385.68	2317.31	2309.87	2293.66	2304.38	2294.24	2312.47	2308	2295.4	2302.6	2351.27	2302.4	2300.86	2308.84	2307.94	2296.17	2290.23	2298.6	2288.85	2283.74	2284.7	2295.77	2306.3	2304.33	2296.4	2306.66	2283.72	2303.93	2288.51	2286.79	2316.57	2326.58	2350.67	2299.09	2325.16	2296.33	2289.94	2310.01	2299.26	2288.3	2299.91	2309.6	2373.66
	89.5	2314.05	2308.32	2291.2	2297.54	2297.12	2385.86	2317.57	2309.29	2293.07	2303.86	2293.64	2312.02	2307.33	2295.17	2302.9	2350.88	2301.98	2300.26	2307.88	2306.57	2295.49	2290.24	2298.68	2288.31	2283.21	2284.04	2295	2305.19	2303.8	2295.57	2306.27	2283.58	2303.46	2288.56	2286.48	2316.47	2325.92	2349.99	2298.4	2324.58	2295.74	2289.87	2309.6	2299.25	2287.34	2299.28	2308.94	2373.33
	90	2313.64	2307.86	2291.04	2297.37	2296.81	2385.72	2317.81	2309.04	2292.36	2303.71	2293.24	2311.6	2306.39	2294.59	2303.22	2350.08	2301.41	2300.04	2306.98	2305.39	2294.95	2290.23	2298.33	2287.7	2282.74	2283.72	2294.54	2304.36	2303.62	2295.05	2306.13	2283.12	2303.03	2288.15	2286.11	2316.49	2325.62	2349.62	2297.75	2323.19	2295.15	2289.43	2309.26	2299.1	2286.54	2298.64	2308.37	2372.7
	90.5	2312.58	2307.6	2290.98	2297.12	2296.64	2385.12	2317.83	2308.99	2291.71	2303.54	2293.06	2311.16	2305.38	2294.2	2303.18	2349.32	2300.77	2299.93	2306.49	2304.1	2294.6	2289.81	2298.32	2286.92	2282.39	2283.16	2294.22	2303.69	2303.43	2294.57	2305.96	2282.61	2302.86	2287.71	2285.56	2316.18	2325.34	2349.4	2297.24	2321.96	2294.65	2288.83	2308.73	2298.66	2286.12	2298.18	2308.04	2371.73
	91	2311.66	2307.35	2290.8	2296.8	2296.42	2383.73	2317.41	2308.77	2291.29	2303.24	2292.97	2311.23	2304.47	2293.59	2303.33	2348.05	2299.94	2299.25	2306.36	2303.16	2294.42	2289.72	2298.46	2286.12	2282.26	2282.18	2294.15	2302.96	2303.35	2294.3	2305.86	2282.28	2303	2287.14	2285.15	2315.81	2325.13	2348.89	2296.82	2321.25	2294.59	2288.35	2308.11	2298.58	2285.73	2297.71	2307.84	2370.72
	91.5	2310.86	2307.05	2290.73	2296.92	2296.16	2382.71	2316.73	2308.38	2290.84	2302.88	2292.74	2310.81	2303.72	2293.36	2303.32	2346.59	2298.99	2298.71	2306.37	2302.77	2294.55	2289.68	2298.54	2285.59	2281.65	2281.4	2294.31	2302.58	2302.85	2294.22	2305.84	2281.78	2303.02	2286.45	2284.62	2314.92	2325.12	2348.72	2296.55	2320.59	2294.34	2287.32	2307.56	2298.28	2285.44	2297.32	2307.97	2369.77
	92	2310.33	2306.52	2290.59	2296.89	2295.9	2381.59	2315.6	2307.65	2290.53	2302.43	2292.27	2310.48	2303.32	2292.82	2302.63	2345.28	2298.34	2298.08	2306.39	2302.64	2294.21	2289.17	2298.24	2284.89	2280.92	2281.05	2294.35	2302.2	2302.4	2294.04	2305.71	2280.71	2302.85	2285.56	2284.48	2314.33	2324.87	2348.54	2296.49	2319.61	2294.01	2286.17	2306.84	2297.64	2285.34	2296.84	2307.71	2368.87
	92.5	2310.05	2305.61	2289.77	2296.45	2295.61	2380.54	2314.5	2306.77	2290.3	2302.1	2292.05	2310.23	2303.25	2292.4	2301.79	2344.43	2297.77	2297.05	2306.46	2302.44	2293.9	2288.58	2297.79	2284.45	2280.2	2280.27	2293.97	2301.78	2301.65	2293.75	2305.6	2279.95	2302.69	2284.81	2284.37	2313.52	2324.5	2347.82	2296.39	2319.43	2293.36	2285.23	2306.21	2296.89	2285.01	2296.35	2307.54	2368.12
	93	2310.16	2304.52	2288.82	2295.78	2295.1	2379.37	2313.63	2305.79	2289.93	2301.46	2291.6	2310.16	2303.28	2292.09	2301.07	2343.46	2297.5	2295.83	2306.08	2302.44	2293.58	2288.13	2297.13	2284.3	2279.52	2279.65	2293.63	2301.5	2300.85	2293.26	2305.19	2279.59	2302.25	2283.94	2284.45	2312.99	2324.19	2346.86	2296.33	2319.25	2292.81	2284.76	2306.02	2296.35	2284.51	2295.98	2307.03	2367.56
	93.5	2310.11	2303.37	2287.84	2295.05	2295.1	2378.66	2312.84	2305.25	2289.43	2300.72	2291.02	2309.82	2302.99	2291.75	2300.09	2342.87	2297.59	2295.13	2305.54	2302.3	2293.18	2287.3	2296.37	2284.2	2278.76	2279.64	2293.05	2301.2	2300.01	2292.51	2304.74	2279.31	2301.26	2283.08	2284.37	2312.36	2323.95	2346.07	2296.05	2318.59	2291.8	2284.39	2306.12	2295.25	2284.18	2295.43	2306.39	2366.71
	94	2310.19	2302.61	2286.66	2294.09	2295	2377.01	2312.31	2304.79	2289	2299.6	2289.86	2309.34	2302.76	2291.51	2299.07	2342.14	2298.42	2294.2	2303.91	2301.99	2292.54	2286.55	2295.75	2284.27	2278.68	2279.72	2293.08	2300.62	2299.79	2291.19	2303.72	2280.03	2300.3	2282.35	2284.51	2311.82	2323.99	2345.22	2296.03	2318.3	2290.92	2284.03	2306.72	2294.81	2283.89	2295.38	2305.91	2366.36
	94.5	2310.03	2301.81	2285.4	2293	2294.8	2375.53	2312.03	2304.61	2288.35	2298.37	2288.93	2309.09	2302.23	2291.35	2298.31	2341.35	2299.26	2293.32	2302.35	2301.55	2292.09	2285.9	2295.15	2284.53	2278.69	2279.65	2293.01	2300.17	2299.51	2289.85	2302.63	2281.07	2299.19	2281.62	2284.44	2311.2	2324.14	2344.19	2295.93	2318.17	2290.03	2284.11	2307.58	2294.42	2283.5	2295.36	2305.35	2365.74
	95	2310.4	2302.26	2284.14	2292.56	2294.61	2372.39	2311.85	2304.28	2287.97	2296.29	2286.32	2307.45	2301.88	2291.48	2297.76	2340.28	2301.45	2292.31	2298.47	2301.56	2291.32	2285.53	2295.29	2284.83	2279.71	2280.08	2294.46	2299.46	2300.26	2287.75	2300.48	2283.72	2298.41	2281.48	2284.85	2310.32	2325.16	2344.13	2296.38	2318.73	2289.27	2283.02	2309.26	2295.32	2283.28	2296.4	2305.7	2366.48
[truncated: 12 more columns]

## Sheet: Melt Curve Peak Results
	Well	Fluor	Target	Content	Sample	Melt Temperature	Peak Height	Begin Temperature	End Temperature	Well Note
	A01	SYBR	7	Unkn	NaCl-24h	85.5	97.4351	80	89
	A02	SYBR	7	Unkn	NaCl-48h	85.5	98.3104	81	90.5
	A03	SYBR	7	Unkn	NaCl-72h	85	79.7948	78.5	88.5
	A04	SYBR	16	Unkn	NaCl-24h	83.5	67.8231	79	88
	A05	SYBR	16	Unkn	NaCl-48h	83.5	69.1727	77	87.5
	A06	SYBR	16	Unkn	NaCl-72h	83.5	78.9978	78	87.5
	A07	SYBR	G	Unkn	NaCl-24h	83.5	100.303	80.5	87
	A08	SYBR	G	Unkn	NaCl-48h	84	106.53	80.5	87
	A09	SYBR	G	Unkn	NaCl-72h	83.5	94.7689	80.5	87
	B01	SYBR	7	Unkn	NaCl-24h	85.5	79.1075	80.5	90
	B02	SYBR	7	Unkn	NaCl-48h	85.5	90.4912	81.5	90.5
	B03	SYBR	7	Unkn	NaCl-72h	85	84.2388	82	89
	B04	SYBR	16	Unkn	NaCl-24h	83.5	70.7994	79.5	87
	B05	SYBR	16	Unkn	NaCl-48h	83.5	71.0199	79	89.5
	B06	SYBR	16	Unkn	NaCl-72h	83	77.4868	72	89
	B07	SYBR	G	Unkn	NaCl-24h	83.5	103.092	80.5	87
	B08	SYBR	G	Unkn	NaCl-48h	83.5	93.3325	80.5	87
	B09	SYBR	G	Unkn	NaCl-72h	83.5	94.1549	80.5	87
	C01	SYBR	7	Unkn	NaCl-24h	85.5	104.456	80.5	88.5
	C02	SYBR	7	Unkn	NaCl-48h	85.5	104.204	81.5	91.5
	C03	SYBR	7	Unkn	NaCl-72h	85	92.6342	79	91
	C04	SYBR	16	Unkn	NaCl-24h	83.5	85.1451	77.5	88
	C05	SYBR	16	Unkn	NaCl-48h	83.5	80.2149	78.5	87.5
	C06	SYBR	16	Unkn	NaCl-72h	83	83.5031	78	87
	C07	SYBR	G	Unkn	NaCl-24h	83.5	115.473	79.5	87
	C08	SYBR	G	Unkn	NaCl-48h	83.5	113.91	80	87
	C09	SYBR	G	Unkn	NaCl-72h	83.5	111.922	80	86.5
	D01	SYBR	7	Unkn	NaCl-24h	85.5	94.0647	81.5	88.5
	D02	SYBR	7	Unkn	NaCl-48h	85.5	95.0269	82	90
	D03	SYBR	7	Unkn	NaCl-72h	85	91.5403	79.5	88.5
	D04	SYBR	16	Unkn	NaCl-24h	83.5	72.2055	79	86.5
	D05	SYBR	16	Unkn	NaCl-48h	83	83.5963	79	87.5
	D06	SYBR	16	Unkn	NaCl-72h	83	80.9259	78	87.5
	D07	SYBR	G	Unkn	NaCl-24h	83.5	108.912	79.5	88.5
	D08	SYBR	G	Unkn	NaCl-48h	83.5	110.347	80.5	87
	D09	SYBR	G	Unkn	NaCl-72h	83.5	98.8715	80.5	89
	E01	SYBR	10	Unkn	NaCl-24h	83	88.5668	71.5	88
	E02	SYBR	10	Unkn	NaCl-48h	83	97.1794	76.5	88.5
	E03	SYBR	10	Unkn	NaCl-72h	83	74.1593	77	88
	E04	SYBR	73	Unkn	NaCl-24h	82	92.7086	78.5	85
	E05	SYBR	73	Unkn	NaCl-48h	81.5	66.8645	78.5	85.5
	E06	SYBR	73	Unkn	NaCl-72h	82	95.0883	78.5	85
	F01	SYBR	10	Unkn	NaCl-24h	83	83.7862	71.5	87.5
	F02	SYBR	10	Unkn	NaCl-48h	83	94.889	77.5	89
	F03	SYBR	10	Unkn	NaCl-72h	83	69.1871	76.5	87
	F04	SYBR	73	Unkn	NaCl-24h	82	83.9414	78.5	85
	F05	SYBR	73	Unkn	NaCl-48h	82	78.9014	78.5	85
	F06	SYBR	73	Unkn	NaCl-72h	82	95.4864	78.5	85
	G01	SYBR	10	Unkn	NaCl-24h	83	92.3047	77.5	87
	G02	SYBR	10	Unkn	NaCl-48h	83	94.2331	78	88
	G03	SYBR	10	Unkn	NaCl-72h	83	84.0741	77.5	89
	G04	SYBR	73	Unkn	NaCl-24h	82	90.0477	69.5	85
	G05	SYBR	73	Unkn	NaCl-48h	82	86.988	78.5	85
	G06	SYBR	73	Unkn	NaCl-72h	82	102.475	78	86
	H01	SYBR	10	Unkn	NaCl-24h	83	93.2319	76.5	87
	H02	SYBR	10	Unkn	NaCl-48h	83	87.4569	77.5	87.5
	H03	SYBR	10	Unkn	NaCl-72h	83	81.2144	76.5	87
	H04	SYBR	73	Unkn	NaCl-24h	82	80.7509	77	85.5
	H05	SYBR	73	Unkn	NaCl-48h	82	85.769	78.5	85
	H06	SYBR	73	Unkn	NaCl-72h	82	100.524	78.5	85

## Sheet: Quantification Amplification
	Cycle	A1	A2	A3	A4	A5	A6	A7	A8	A9	B1	B2	B3	B4	B5	B6	B7	B8	B9	C1	C2	C3	C4	C5	C6	C7	C8	C9	D1	D2	D3	D4	D5	D6	D7	D8	D9	E1	E2	E3	E4	E5	E6	F1	F2	F3	F4	F5	F6
	1	0.314616	-2.08364	4.62716	5.99557	1.40223	0.849527	0.102921	5.20884	0.0663214	-0.987186	-4.46276	1.33884	1.84279	1.30448	2.93619	-3.25415	0.395674	2.91652	-3.37368	-0.325709	0.0341717	-1.08492	3.13163	-11.8348	-1.30501	-4.68078	3.83725	0.187607	-3.64098	-3.59213	-0.37747	-4.14928	-5.99459	3.0189	-6.15051	5.24577	-5.86011	-10.0325	2.44978	-4.17796	-1.74251	-5.27498	1.59191	-2.39042	0.380258	-3.99054	-10.4409	-9.15248
	2	-2.09493	1.45313	2.95681	0.1207	0.525937	1.69159	3.13975	5.58774	3.02082	2.05185	0.588907	1.01664	2.61872	5.23004	0.0791407	4.61765	-1.30244	5.08394	1.58336	2.88885	2.9035	0.323258	-2.26559	-2.21895	0.524268	-2.69571	7.93824	-1.23046	-0.927648	-1.19261	-1.72742	3.3858	4.95483	5.11599	0.534948	3.36882	-3.50598	-3.10954	0.950698	-5.19492	-3.14425	1.88523	0.960364	-0.370635	2.68034	-2.75953	-0.722207	-1.81944
	3	0.163861	1.39972	-1.80327	1.22789	-2.05873	1.78276	3.6776	2.4943	2.00399	1.21179	0.617069	-1.96338	0.35666	-0.590491	3.82422	1.75902	0.19446	2.77834	-1.31191	-2.11663	-0.59201	0.192888	3.55404	2.5181	2.44743	1.47319	2.66161	-0.624035	-0.805033	1.66705	-2.72289	-1.80847	-1.65261	-0.269078	-0.197817	4.122	-2.53227	-4.11651	-2.4039	-2.33218	3.64758	0.917379	0.737477	-3.44048	2.02076	-5.30391	0.802262	1.5164
	4	0.186789	0.688693	0.419983	0.13898	2.91653	1.44008	-2.18812	-2.37407	4.28716	-1.66746	-0.157563	4.9461	0.093779	3.28084	4.47793	2.2265	-0.0437999	-1.2102	5.80042	-0.796379	-0.286566	-1.30467	5.02224	1.25957	-3.16665	0.209696	2.40964	3.82214	-1.36614	1.02882	2.2255	-4.39792	4.50925	6.95705	0.424652	0.337554	-1.00588	-3.57254	2.65913	0.504458	-1.81602	2.08048	-3.32662	-0.973247	8.9621	2.13467	2.10273	1.11619
	5	-1.02699	-0.285679	4.71995	3.32361	-0.866053	0.649317	-1.24259	4.01394	-0.636826	3.37088	3.44627	-2.76779	-0.485401	-1.57957	1.1464	-0.199805	0.230299	0.890717	-2.61809	-4.36885	-0.350128	2.12891	3.00371	-4.07742	0.661933	-2.21023	1.72327	-1.50241	0.203399	0.954923	-4.63506	2.30814	2.43912	-1.0058	4.42709	-0.303855	-1.13784	4.1926	-0.116983	-0.171503	0.569656	-0.00621963	-5.8257	-2.0962	-2.63873	0.642643	1.49717	3.45127
	6	-0.320283	-1.20746	1.27564	2.56418	-0.26901	-1.83692	0.414113	1.52547	-3.52149	1.51751	1.55364	1.24877	4.10319	1.43876	-2.35435	-4.66444	2.4771	2.87317	1.65402	0.462772	-0.123436	-0.513728	-2.26248	0.555014	-0.177286	1.57686	1.26054	1.89165	0.076207	1.5534	2.37966	0.94124	2.6184	-1.8671	0.236273	0.975472	4.17566	-2.75913	3.49913	-1.35927	-1.18565	-0.722918	3.4857	6.20905	-6.3884	2.41219	2.39142	4.1687
	7	0.188226	0.409373	-0.722976	0.0551323	3.00989	2.97585	1.70254	-3.73795	-1.42207	-0.860792	1.10794	2.75439	2.86671	-2.90868	2.2843	1.68198	-0.141966	-4.12792	1.07465	1.27035	0.680765	2.5783	2.02013	2.6487	0.956259	2.7991	1.38923	0.210478	2.1448	-2.21426	2.6206	1.5859	0.61373	1.15033	-1.74485	1.64983	2.37496	1.04725	2.14444	-2.86236	-6.03263	0.637095	2.95877	4.90242	1.51239	1.71009	2.41669	0.323313
	8	1.80235	2.34172	0.605738	-1.80924	-2.02147	-0.640968	1.27997	1.62528	1.48016	0.612614	-2.86299	0.760661	1.24957	2.06704	2.18841	1.5448	-0.761858	3.23344	-0.321427	4.76034	0.223677	1.50166	-0.352884	1.54682	4.06263	-1.0148	-0.874848	0.987712	0.53226	0.328672	-0.913553	3.04604	0.845655	-0.315923	-1.0033	0.351125	-0.150682	2.07801	3.87917	0.158256	1.81137	3.53633	2.18296	2.33231	-0.90919	0.429194	0.4562	-0.483659
	9	0.917555	0.657091	4.23523	2.20436	0.193297	-0.668877	-3.24443	-3.11255	0.173441	1.56164	-2.2043	0.42425	-1.76306	0.916142	-2.22012	-3.36693	-1.57891	-0.531343	2.63516	1.99097	3.02681	-0.614711	-4.43593	-0.804391	-2.69586	-0.989924	-4.02029	3.14531	-0.883368	5.42444	1.72112	1.34991	-1.1722	-1.41421	-1.74925	-7.35237	-3.80561	3.54385	-4.10382	5.69047	3.55292	-2.14019	1.26245	-4.7093	-0.569306	-0.667715	1.63881	0.641444
	10	-0.716592	-0.277933	-2.39153	-0.72561	0.920824	0.382717	-1.3511	-1.05078	-2.39554	0.641305	-0.00640103	-2.87079	0.406595	1.22443	1.64184	0.348821	-0.962647	-1.9424	-1.79836	1.40404	0.596655	-2.03321	2.58107	-3.03652	-0.26003	-2.739	-0.879296	-2.96758	1.65885	1.55088	1.92204	0.771344	-0.349521	-1.36712	-1.40251	-3.77258	4.88688	1.6033	-1.57948	0.293462	1.00866	0.180249	1.30236	1.38808	-0.755264	-1.0282	-5.35806	-2.49339
	11	2.46261	-0.96309	-1.16896	-0.17013	-1.16533	3.0255	-0.208588	-0.803955	-2.23014	-1.67111	-0.754924	-1.60307	-1.39453	1.84724	-2.27989	1.21111	-0.386156	-5.28627	-0.879501	4.84229	0.494358	3.64948	-4.31542	-1.69244	2.45055	3.00694	-0.316757	0.281239	-1.90065	-1.69119	2.34794	1.10001	0.394095	-0.38766	1.81062	-0.191808	3.38901	2.76607	-1.86955	2.85436	-0.958997	-1.77291	-3.12318e-05	1.8293	-2.37527	-1.06074	-0.190509	-0.447878
	12	1.86642	-2.8708	-1.7863	-2.50965	3.19301	-6.16873	-0.143695	1.98124	-3.43126	-1.49908	-2.09548	0.519831	-3.11812	-4.99892	-5.03263	-0.675448	1.91274	2.85025	-2.19706	-0.00537364	3.77105	-0.00641414	1.42607	2.4006	-3.20165	-0.689646	-3.46275	-4.59556	1.35085	-1.68602	-3.6581	1.42862	-3.57005	-1.56532	1.3933	0.245065	2.09945	2.06039	3.06117	2.4944	2.99298	0.336152	2.53702	-3.52845	1.37045	3.39182	-2.97996	-2.04478
	13	-1.84541	1.49463	-0.720076	-1.65105	-0.418887	-0.198546	3.11713	-2.97906	2.46845	-2.70777	-1.55556	-0.15813	-2.34219	0.477811	-3.93085	-1.07633	0.66239	2.87282	0.813998	-1.30256	0.328806	-3.50236	-0.421038	3.12716	2.16578	1.54651	-5.20068	3.4413	0.593135	-3.11259	1.08074	-1.43749	-0.523153	2.12419	1.25354	2.61585	3.06054	-1.45812	-1.60737	3.67426	-6.96889	0.131389	-0.171293	1.5156	-1.51054	1.82135	-1.02036	-1.576
	14	-0.560217	0.362691	-3.65325	-1.38545	-0.256244	-5.99926	7.65383	5.0395	5.06761	1.55419	2.14154	-0.0467822	-0.61931	-0.42322	1.22046	2.90343	2.43624	1.64574	0.798048	-2.50685	-1.15483	2.78474	-3.17471	-3.56354	0.944381	1.49355	0.202048	-1.71337	3.58312	-1.51617	-0.0196487	-0.844801	-4.96061	4.15509	1.90188	4.61836	-3.00204	1.78265	-2.18635	-1.48484	0.0986734	-2.76951	-3.2757	6.09987	0.27559	-0.287955	-2.58726	-0.161254
	15	-0.155719	-2.00571	0.199935	-2.55348	-2.18459	1.93043	13.1889	8.28441	8.74499	-4.63952	-1.18501	-2.86948	-1.75117	-1.99632	-2.20306	7.92018	6.19456	6.78386	0.520213	2.49497	-1.04759	2.32539	-3.66793	-1.996	10.1651	13.9595	12.0483	-1.67189	3.75837	-2.27256	-0.31877	0.33833	-4.99301	7.98867	8.71873	8.38158	-0.0299509	-0.68503	0.507524	0.312003	4.7473	-3.19791	-0.76329	-1.69067	-0.805215	-2.34584	-1.4828	1.47718
	16	2.58896	-3.17737	-1.57437	3.13043	4.2382	-4.39556	20.1975	23.9452	19.4063	1.49089	3.47184	-1.83717	0.825556	-0.412527	-4.83611	21.6309	19.0156	16.946	-3.13729	-0.59009	-4.7136	-3.47255	-4.67223	-3.83424	24.213	21.8496	15.9521	-0.684497	-2.31242	0.0737636	4.13141	-1.14667	-1.8551	22.3034	18.5336	22.9956	-1.02876	-3.87461	-1.18847	5.68666	0.203195	2.00216	3.18158	2.19604	0.416584	2.27838	-0.918448	0.406743
	17	0.0467913	3.96307	-0.758629	2.60708	-1.12239	-3.42432	42.8424	43.957	45.2028	0.768379	3.59169	1.86375	-2.84402	-3.32695	0.485706	42.0613	36.0698	34.7615	1.31917	2.58384	-1.30514	-4.82645	-2.59993	3.97996	47.7942	48.0182	36.1357	-2.12904	-1.49371	-2.77356	-1.34903	-1.64673	1.29488	49.7425	50.2971	42.6466	-4.13229	5.00786	-1.11015	-0.223331	0.195369	2.4683	1.40624	-1.60956	-3.47864	-1.59445	-2.44466	-2.05762
	18	-1.23128	-0.246996	-1.94121	-1.13807	-1.97282	1.78334	76.9689	82.8157	78.3521	-1.13697	-3.52227	2.96072	1.56182	3.11045	-4.33026	77.7603	70.4845	71.4366	-3.08793	-2.97279	2.02488	-1.66823	1.24694	3.15437	92.7855	87.3005	79.071	1.73889	-1.1729	-3.46467	-0.424074	0.931287	3.94697	84.4014	85.4935	75.1851	-2.67171	-2.50851	3.32047	-0.0690397	0.491946	2.53927	-2.93328	-4.91604	1.35915	-2.80915	-0.0521835	-5.79777
	19	-1.43266	0.817827	3.08225	1.54683	1.39899	9.37019	137.699	144.858	133.015	1.88828	2.34427	-0.0845162	-3.46177	3.39135	3.28037	136.363	126.097	126.087	-1.0523	0.241156	2.83	5.6583	-3.68971	7.72128	158.854	153.694	141.482	-2.20554	0.711411	2.53827	-3.91851	0.497117	7.71454	147.44	148.968	135.178	-3.36832	-0.162597	-1.4536	-7.54313	-1.79079	0.651683	-0.987712	-0.0563431	2.71113	0.525349	1.26213	-3.39778
	20	-0.0290603	1.75003	4.93711	3.4049	4.45566	16.6949	189.249	200.124	182.835	0.811598	-2.6917	1.1574	3.84949	7.72367	12.9425	189.127	175.788	175.439	-1.35539	-2.06843	0.0702451	2.08207	7.44332	18.1526	217.724	214.845	202.877	-0.638382	-0.598986	9.23847	1.85981	9.50676	10.8534	204.991	205.083	186.663	-2.50045	-0.248847	-4.4919	-6.36424	2.44948	1.24923	1.64317	-4.20319	-0.236966	1.57238	1.09079	-5.8215
	21	-1.26864	-0.0914889	8.22474	4.90665	12.0875	38.0635	229.003	244.492	222.05	2.61491	0.308754	10.2369	4.71784	11.727	19.593	231.77	213.582	212.902	6.65148	0.751013	8.50343	6.55544	9.34512	29.2154	264.819	261.092	246.842	6.3987	-7.19691	4.52332	5.42783	16.6209	28.1144	249.491	250.059	226.272	0.104467	-0.138492	5.77831	-3.36973	-1.69987	7.05389	0.498652	-3.03824	0.301055	-0.143341	-3.88103	4.3376
	22	3.00202	3.6031	15.4065	11.05	25.1902	59.9202	257.351	274.824	252.704	-0.605961	1.86101	18.7907	12.2526	22.9113	55.3342	262.848	239.448	240.038	1.50741	2.36115	22.8534	16.9327	23.3703	62.5292	299.053	296.419	278.753	0.745278	2.34256	21.0859	13.2038	31.403	52.0695	281.818	280.92	252.244	2.53736	-2.74983	2.0028	2.29449	4.38238	16.6205	-0.619998	0.848162	2.33681	7.38723	3.75809	14.3928
	23	2.97169	5.57418	29.0562	19.0221	51.4448	100.476	283.49	301.864	277.292	5.66756	3.309	35.393	26.6124	52.0589	94.401	289.652	263.398	262.023	6.55559	6.33763	39.9645	29.2033	51.218	111.02	329.942	324.008	307.042	7.50632	4.04313	41.6989	26.1086	69.5532	97.1195	307.574	308.252	277.05	2.81289	2.51543	4.94775	6.69493	1.75778	27.396	-3.05295	-0.472925	6.04373	7.39416	5.99306	26.7886
	24	14.7642	11.0827	60.0803	39.7897	88.1932	159.492	305.99	327.128	301.782	8.52353	10.4242	65.2902	45.1545	87.4276	146.83	313.87	285.467	282.249	10.9065	12.1684	75.0014	53.77	97.556	168.12	358.402	350.621	334.174	11.097	15.0937	79.619	49.6791	104.522	149.735	334.298	334.348	299.528	2.81421	-0.622486	9.73383	9.00499	11.1012	51.7448	2.5099	0.311372	12.958	16.9366	10.7268	49.363
	25	23.4664	24.6539	105.951	71.7893	141.761	211.354	325.466	347.373	318.738	20.0048	20.223	107.944	82.1085	140.264	196.515	332.258	303.145	300.188	27.3558	32.4126	135.538	100.523	159.101	221.2	380.976	371.368	354.604	22.5668	25.1059	138.593	81.1275	173.976	198.94	355.013	355.481	319.021	1.61696	7.70858	23.1603	25.9649	24.4294	101.079	2.53566	6.94631	24.477	26.8726	26.6905	95.4392
	26	47.1091	45.4046	165.262	112.152	194.436	252.533	340.273	362.165	333.681	39.6009	40.3587	168.51	133.401	190.537	239.042	347.349	317.556	313.137	49.3297	55.2088	202.803	163.219	218.801	265.784	397.781	386.302	369.133	39.2828	45.324	201.364	137.299	238.302	240.925	372.23	373.116	332.345	9.85004	8.22699	43.4655	52.894	44.4903	139.095	8.61172	7.23118	43.8719	46.8966	47.916	137.735
	27	86.2546	83.2787	216.546	164.969	238.702	280.219	351.148	373.765	345.249	65.72	74.9328	226.327	181.77	233.787	267.409	359.731	327.246	325.614	91.4901	98.94	268.152	223.929	272.81	298.16	410.754	399.313	382.054	83.6427	84.3206	261.399	191.113	291.914	270.439	384.099	384.685	344.439	14.2296	19.2001	79.4058	95.4062	74.8623	170.049	10.0185	17.404	83.9933	84.4497	79.9768	171.383
	28	151.256	149.672	257.569	205.533	271.668	301.47	360.498	383.573	355.573	115.3	135.806	272.413	225.738	265.653	285.159	370.343	334.942	334.408	161.478	171.771	319.487	277.165	312.823	319.195	421.97	411.078	393.063	140.075	145.823	305.202	237.145	330.798	290.331	394.819	395.653	354.494	30.8661	34.1188	135.161	148.484	108.135	196.624	26.8259	28.182	136.406	131.191	123.988	196.829
	29	218.48	219.239	286.375	236.278	293.174	315.563	367.362	392.587	362.647	173.832	199.413	304.696	255.507	287.752	298.798	379.082	341.538	340.831	233.227	249.98	353.182	315.405	339.264	331.21	431.191	419.367	401.315	211.02	211.227	333.658	270.018	355.596	303.95	403.08	401.878	361.813	60.1407	69.0797	193.143	186.976	135.197	225.842	49.1818	64.2234	192.12	167.846	158.604	224.213
	30	281.197	284.3	305.259	251.873	308.163	326.14	376.387	401.067	365.672	228.041	261.32	325.028	276.118	303.052	308.477	386.231	347.099	347.188	301.21	321.609	375.471	338.543	356.963	339.611	439.903	424.885	407.085	272.796	272.843	351.409	291.357	369.374	314.219	410.376	409.527	365.92	104.235	113.877	246.026	215.404	154.785	252.592	89.3053	112.1	244.503	195.759	184.221	252.385
	31	331.518	335.574	318.376	263.725	317.053	332.925	381.133	405.465	370.151	269.463	309.729	339.399	285.657	313.635	318.517	391.603	352.743	351.073	352.286	377.786	391.154	353.738	366.032	347.049	443.934	428.422	410.976	320.964	318.752	365.048	304.372	380.574	320.053	411.825	415.213	368.816	178.06	196.61	287.025	242.596	176.218	277.036	155.875	192.149	283.143	220.333	209.347	275.166
	32	364.014	368.595	326.828	269.361	323.634	336.023	384.201	409.592	374.841	299.273	342.726	350.101	295.634	320.164	323.313	395.398	356.033	356.119	386.244	412.474	401.665	364.01	373.334	355.328	448.955	433.257	413.902	352.116	348.517	373.804	314.055	389.009	323.462	413.479	420.67	372.304	255.028	282.701	312.774	271.734	194.386	296.772	228.082	275.423	309.736	246.38	234.066	296.627
	33	384.929	392.726	334.902	274.935	329.841	339.437	387.181	411.943	380.794	316.887	363.628	357.322	303.287	324.689	326.361	397.43	359.289	358.53	406.614	434.836	411.053	371.828	377.059	360.596	453.336	436.491	416.683	373.369	366.749	378.737	318.719	395.291	325.491	416.121	422.318	376.384	329.042	362.3	328.813	298.755	212.286	316.776	297.65	353.933	325.822	270.072	255.317	312.473
	34	398.094	407.432	340.404	280.614	334.09	341.843	388.829	414.991	383.042	332.696	379.314	363.241	307.71	325.602	326.453	401.536	361.457	362.744	421.634	449.964	413.852	377.199	381.849	363.865	457.349	440.589	418.149	388.709	378.102	381.653	324.913	399.065	328.861	420.897	425.22	378.268	386.314	425.666	339.079	319.7	224.593	332.028	354.137	415.373	336.993	291.485	274.389	329.024
	35	410.382	421.046	343.394	283.55	336.54	346.072	391.909	417.044	386.593	340.934	390.371	366.644	308.393	327.076	326.949	403.13	363.304	363.919	433.402	458.715	417.458	380.045	384.114	362.39	459.999	442.868	422.004	398.193	386.799	384.478	329.117	402.809	331.845	426.457	426.207	380.612	424.719	466.746	346.425	340.746	237.999	345.421	391.034	455.688	344.536	309.698	288.337	340.675
	36	417.918	427.392	345.205	285.753	337.58	348.601	393.701	419.394	388.437	348.492	399.218	371.234	308.989	327.848	327.467	406.354	364.556	366.291	440.752	465.808	418.429	382.26	387.05	363.87	461.79	446.615	426.091	406.72	394.203	387.899	333.649	405.939	334.088	428.476	431.528	381.093	448.111	495.201	352.32	356.194	249.328	354.545	413.544	482.015	350.346	326.648	304.253	352.632
	37	423.075	435.106	345.596	284.756	337.624	350.121	398.535	420.001	391.445	351.382	402.949	374.032	310.523	329.682	327.705	406.822	366.768	366.318	445.678	472.069	423.004	385.312	386.978	363.335	465.729	447.636	430.709	411.061	400.174	389.623	333.425	407.868	336.221	431.564	430.595	383.341	461.994	512.092	356.721	369.052	261.841	362.95	426.572	498.628	355.815	341.397	314.541	360.96
	38	423.659	437.464	346.692	285.338	338.125	350.901	401.63	422.098	392.387	353.365	406.883	375.844	314.218	332.814	327.904	407.929	368.594	367.709	448.227	478.181	424.418	386.243	388.467	366.533	468.51	449.578	428.958	416.415	405.044	390.264	334.64	406.185	335.725	430.094	433.755	385.597	471.595	523.662	359.675	378.893	269.075	370.105	437.64	510.853	359.132	351.045	323.991	369.805
	39	425.908	442.132	348.884	282.526	339.037	351.886	402.282	422.63	394.123	354.182	407.441	375.398	315.529	333.801	328.01	409.997	370.964	369.104	451.605	482.552	426.025	387.638	387.901	365.673	469.638	450.625	428.771	417.329	407	389.069	334.81	405.642	334.173	431.056	433.203	388.871	478.013	530.349	360.534	386.727	274.131	377.94	445.996	518.563	363.706	359.346	330.277	375.696
	40	429.196	445.835	352.694	278.049	341.439	352.907	401.278	424.463	395.078	355.897	408.165	376.491	317.729	333.82	328.269	413.555	372.072	374.194	453.866	484.999	426.725	386.35	388.955	363.725	467.593	451.988	430.894	417.484	408.587	387.484	334.687	405.958	330.902	431.913	434.851	391.443	481.959	537.6	360.919	394.968	276.781	385.078	453.373	523.957	367.974	366.267	338.526	381.982
[truncated: 12 more columns]

## Sheet: Quantification Cq Results
	Well	Fluor	Target	Content	Sample	Biological Set Name	Cq	Cq Mean	Cq Std. Dev	Starting Quantity (SQ)	Log Starting Quantity	SQ Mean	SQ Std. Dev	Set Point	Well Note
	A01	SYBR	7	Unkn	NaCl-24h		25.6974	25.6974	0				0	60
	A02	SYBR	7	Unkn	NaCl-48h		25.7374	25.7374	0				0	60
	A03	SYBR	7	Unkn	NaCl-72h		22.3513	22.3513	0				0	60
	A04	SYBR	16	Unkn	NaCl-24h		24.0052	24.0052	0				0	60
	A05	SYBR	16	Unkn	NaCl-48h		22.5624	22.5624	0				0	60
	A06	SYBR	16	Unkn	NaCl-72h		21.0865	21.0865	0				0	60
	A07	SYBR	G	Unkn	NaCl-24h		16.8725	16.8725	0				0	60
	A08	SYBR	G	Unkn	NaCl-48h		16.8	16.8	0				0	60
	A09	SYBR	G	Unkn	NaCl-72h		16.7966	16.7966	0				0	60
	B01	SYBR	7	Unkn	NaCl-24h		26.0136	26.0136	0				0	60
	B02	SYBR	7	Unkn	NaCl-48h		25.98	25.98	0				0	60
	B03	SYBR	7	Unkn	NaCl-72h		22.1526	22.1526	0				0	60
	B04	SYBR	16	Unkn	NaCl-24h		23.7196	23.7196	0				0	60
	B05	SYBR	16	Unkn	NaCl-48h		22.5847	22.5847	0				0	60
	B06	SYBR	16	Unkn	NaCl-72h		21.5697	21.5697	0				0	60
	B07	SYBR	G	Unkn	NaCl-24h		16.8969	16.8969	0				0	60
	B08	SYBR	G	Unkn	NaCl-48h		17.1129	17.1129	0				0	60
	B09	SYBR	G	Unkn	NaCl-72h		17.1416	17.1416	0				0	60
	C01	SYBR	7	Unkn	NaCl-24h		25.5734	25.5734	0				0	60
	C02	SYBR	7	Unkn	NaCl-48h		25.3309	25.3309	0				0	60
	C03	SYBR	7	Unkn	NaCl-72h		22.4994	22.4994	0				0	60
	C04	SYBR	16	Unkn	NaCl-24h		23.4377	23.4377	0				0	60
	C05	SYBR	16	Unkn	NaCl-48h		22.5956	22.5956	0				0	60
	C06	SYBR	16	Unkn	NaCl-72h		21.3224	21.3224	0				0	60
	C07	SYBR	G	Unkn	NaCl-24h		16.6676	16.6676	0				0	60
	C08	SYBR	G	Unkn	NaCl-48h		16.6919	16.6919	0				0	60
	C09	SYBR	G	Unkn	NaCl-72h		17.089	17.089	0				0	60
	D01	SYBR	7	Unkn	NaCl-24h		26.0152	26.0152	0				0	60
	D02	SYBR	7	Unkn	NaCl-48h		25.7344	25.7344	0				0	60
	D03	SYBR	7	Unkn	NaCl-72h		22.3154	22.3154	0				0	60
	D04	SYBR	16	Unkn	NaCl-24h		23.5874	23.5874	0				0	60
	D05	SYBR	16	Unkn	NaCl-48h		22.2242	22.2242	0				0	60
	D06	SYBR	16	Unkn	NaCl-72h		21.4943	21.4943	0				0	60
	D07	SYBR	G	Unkn	NaCl-24h		16.6433	16.6433	0				0	60
	D08	SYBR	G	Unkn	NaCl-48h		16.6744	16.6744	0				0	60
	D09	SYBR	G	Unkn	NaCl-72h		16.863	16.863	0				0	60
	E01	SYBR	10	Unkn	NaCl-24h		28.3105	28.3105	0				0	60
	E02	SYBR	10	Unkn	NaCl-48h		28.1669	28.1669	0				0	60
	E03	SYBR	10	Unkn	NaCl-72h		25.8271	25.8271	0				0	60
	E04	SYBR	73	Unkn	NaCl-24h		25.5195	25.5195	0				0	60
	E05	SYBR	73	Unkn	NaCl-48h		24.7739	24.7739	0				0	60
	E06	SYBR	73	Unkn	NaCl-72h		23.5158	23.5158	0				0	60
	F01	SYBR	10	Unkn	NaCl-24h		28.5873	28.5873	0				0	60
	F02	SYBR	10	Unkn	NaCl-48h		28.3267	28.3267	0				0	60
	F03	SYBR	10	Unkn	NaCl-72h		25.798	25.798	0				0	60
	F04	SYBR	73	Unkn	NaCl-24h		25.6533	25.6533	0				0	60
	F05	SYBR	73	Unkn	NaCl-48h		24.6249	24.6249	0				0	60
	F06	SYBR	73	Unkn	NaCl-72h		23.5832	23.5832	0				0	60
	G01	SYBR	10	Unkn	NaCl-24h		28.4294	28.4294	0				0	60
	G02	SYBR	10	Unkn	NaCl-48h		28.2225	28.2225	0				0	60
	G03	SYBR	10	Unkn	NaCl-72h		25.23	25.23	0				0	60
	G04	SYBR	73	Unkn	NaCl-24h		25.312	25.312	0				0	60
	G05	SYBR	73	Unkn	NaCl-48h		24.4171	24.4171	0				0	60
	G06	SYBR	73	Unkn	NaCl-72h		23.344	23.344	0				0	60
	H01	SYBR	10	Unkn	NaCl-24h		28.2514	28.2514	0				0	60
	H02	SYBR	10	Unkn	NaCl-48h		28.1658	28.1658	0				0	60
	H03	SYBR	10	Unkn	NaCl-72h		25.7583	25.7583	0				0	60
	H04	SYBR	73	Unkn	NaCl-24h		25.5671	25.5671	0				0	60
	H05	SYBR	73	Unkn	NaCl-48h		24.41	25.41	0				0	60
	H06	SYBR	73	Unkn	NaCl-72h		23.2993	23.2993	0				0	60

## Sheet: Run Information
File Name	NaCl.pcrd
Created By User	admin
Notes
ID
Run Started	08/04/2025 05:28:09 UTC
Run Ended	08/04/2025 06:33:52 UTC
Sample Vol	10
Lid Temp	105
Protocol File Name	Mei5Bio-2step.prcl
Plate Setup File Name	NaCl.pltd
Base Serial Number	CT022697
Optical Head Serial Number	785BR15045
CFX Maestro Version	5.2.008.0222.
