# Supplementary material for: Genome-wide identification of SMALL AUXIN UP RNA (SAUR) gene family and its expression profiles in response to abiotic stress and auxin in tea plants ( Camellia sinensis )
Source: PeerJ journal article supplement (doi:10.7717/peerj.20681), 2026-01-30
Supplement: NTC.xlsx [file NTC.xlsx]

## Sheet: Melt Curve Derivative Results
	Temperature	A1	A2	A3	A4	A5	B1	B2	B3	B4	B5	C1	C2	C3	C4	C5	D1	D2	D3	D4	D5	E1	E2	E3	E4	F1	F2	F3	F4	G1	G2	G3	G4	H1	H2	H3	H4
	65	1.11026	-0.201235	0.42198	0.773992	-0.284046	-0.146502	-0.0209985	-0.35105	-0.705676	1.4519	1.61602	0.260199	0.593074	0.868493	0.967125	1.4171	-0.306339	0.413583	-0.40502	-0.210055	1.18413	0.778083	-0.559028	0.753571	-0.226638	0.187418	-0.136307	0.626288	-0.546897	1.63432	-0.0632113	1.23109	-0.465803	-0.684641	-0.345077	0.601595
	65.5	2.40556	-0.436008	0.91429	1.67698	-0.615433	-0.317421	-0.0454967	-0.760608	-1.52897	3.14579	3.50137	0.563765	1.28499	1.88173	2.09544	3.07039	-0.663734	0.896096	-0.877544	-0.455118	2.56562	1.68585	-1.21123	1.63274	-0.491048	0.406073	-0.295332	1.35696	-1.18494	3.54102	-0.136958	2.66737	-1.00924	-1.48339	-0.747666	1.30346
	66	2.22051	-0.402469	0.84396	1.54798	-0.568092	-0.293004	-0.041997	-0.7021	-1.41135	2.90381	3.23204	0.520398	1.18615	1.73699	1.93425	2.83421	-0.612678	0.827165	-0.81004	-0.420109	2.36826	1.55617	-1.11806	1.50714	-0.453275	0.374837	-0.272614	1.25258	-1.09379	3.26864	-0.126423	2.46219	-0.931607	-1.36928	-0.690153	1.20319
	66.5	2.22051	-0.402469	0.84396	1.54798	-0.568092	-0.293004	-0.041997	-0.7021	-1.41135	2.90381	3.23204	0.520398	1.18615	1.73699	1.93425	2.83421	-0.612678	0.827165	-0.81004	-0.420109	2.36826	1.55617	-1.11806	1.50714	-0.453275	0.374837	-0.272614	1.25258	-1.09379	3.26864	-0.126423	2.46219	-0.931607	-1.36928	-0.690153	1.20319
	67	2.22051	-0.402469	0.84396	1.54798	-0.568092	-0.293004	-0.041997	-0.7021	-1.41135	2.90381	3.23204	0.520398	1.18615	1.73699	1.93425	2.83421	-0.612678	0.827165	-0.81004	-0.420109	2.36826	1.55617	-1.11806	1.50714	-0.453275	0.374837	-0.272614	1.25258	-1.09379	3.26864	-0.126423	2.46219	-0.931607	-1.36928	-0.690153	1.20319
	67.5	2.34273	-0.308484	0.88465	1.6346	-0.636886	-0.221706	0.00385629	-0.614691	-1.28292	2.95283	3.23661	0.641636	1.22148	1.75813	2.01255	2.87796	-0.519313	0.911675	-0.742787	-0.401424	2.4668	1.74719	-1.07579	1.55187	-0.406971	0.449194	-0.278288	1.21543	-1.0673	3.35308	-0.122969	2.5511	-0.924841	-1.3833	-0.650247	1.22293
	68	1.54545	-0.90964	0.606236	1.06468	-0.182133	-0.679313	-0.242058	-1.15562	-2.13488	2.60014	3.29041	-0.136543	0.981249	1.58805	1.43853	2.67637	-1.05898	0.420497	-1.17392	-0.533771	1.90889	0.521104	-1.34	1.29526	-0.737132	-0.0756691	-0.236702	1.47817	-1.23739	2.82221	-0.0913683	1.9438	-0.95675	-1.3169	-0.94176	1.1691
	68.5	0.316312	-1.8959	0.365599	0.262644	0.487962	-1.48109	-1.03398	-2.276	-3.27847	2.33622	2.70997	-1.44254	0.706864	1.57954	1.15647	1.59842	-2.47724	-0.881412	-1.92358	-0.635435	0.382746	-1.53098	-1.89364	0.65324	-1.01019	-0.535804	-0.165244	1.71952	-1.55809	1.77394	-0.543976	1.24216	-1.08613	-1.00605	-1.13195	0.51572
	69	-0.183491	-2.58342	-0.291552	-0.300549	0.633046	-1.60062	-1.82885	-2.64494	-4.13347	2.39274	1.68019	-2.03002	0.529007	1.85087	0.79512	1.14469	-3.34244	-1.444	-2.17571	-0.743447	-1.08562	-2.47242	-1.83716	-0.161172	-1.01744	-0.61489	-0.506422	1.65218	-1.43328	1.64607	-0.581595	1.05911	-1.41103	-0.699698	-1.00811	-0.52099
	69.5	-0.508002	-3.65246	-0.763502	-0.850598	0.303641	-1.56722	-2.58774	-2.34363	-4.38741	2.11058	1.80575	-2.49743	0.342349	2.04221	0.421109	1.7298	-3.92305	-1.36551	-1.86557	-0.796951	-1.3987	-3.46273	-1.46513	-0.573796	-0.952255	-1.00344	-0.763414	1.69377	-1.26795	2.1435	-0.769513	0.767935	-1.40953	-0.986407	-1.19399	-1.40054
	70	-0.827307	-4.63993	-0.146294	-0.820758	0.606484	-1.73319	-3.0618	-1.21607	-3.32329	1.82259	2.7613	-2.64795	0.684522	1.70064	0.361026	2.16547	-4.45733	-1.24139	-1.04826	-0.812859	-0.534482	-3.66237	-1.2161	-0.636241	-0.187497	-1.17603	-0.609172	1.71971	-1.71456	2.77867	-1.90553	0.452511	-0.37437	-0.689677	-1.68889	-1.70244
	70.5	-0.585789	-4.25345	0.718018	0.615586	0.779498	-1.27593	-3.14517	1.45893	-1.2349	1.62462	2.65943	-1.84818	1.6773	1.77461	0.316108	3.22124	-3.81123	0.615218	0.996569	-0.505576	1.17107	-1.94375	-1.17608	-0.0318802	1.65914	-0.919068	-0.630852	2.20427	-1.74201	4.17919	-2.31319	1.06096	0.83872	0.29576	-1.68307	-1.43972
	71	0.547004	-2.60796	2.5402	3.0183	0.217198	-0.0138228	-2.44919	5.41256	1.72846	0.998815	3.42078	0.179127	3.76735	2.71558	0.619628	5.5749	-1.75755	4.5425	4.09651	-0.308074	4.25263	0.502516	-0.842251	1.56361	4.01077	-0.706869	-0.886036	3.18844	-1.23206	5.92251	-2.02158	2.27401	1.49078	0.78249	-1.41197	0.0419919
	71.5	2.54872	0.125011	5.61677	6.37803	-0.0329473	0.7432	-0.852859	10.606	6.58229	0.497574	5.79627	2.47628	7.53077	3.96099	1.57815	7.93995	0.832521	9.60306	8.64755	-0.178472	8.05369	3.31378	-0.491717	3.49788	6.81592	-0.28016	-0.491755	4.72036	-0.89221	7.27971	-1.76616	3.73992	2.67863	1.25261	-1.41837	2.89427
	72	5.29901	4.25798	9.55633	11.7871	0.103736	0.915116	1.74378	16.6782	13.4268	0.828077	7.34603	4.81332	13.6146	6.68778	3.34755	9.77744	4.25034	15.5474	16.0779	-0.355589	11.294	6.93195	-0.758728	6.01758	10.0411	0.30592	-0.131641	7.60381	-0.10425	8.60392	-0.815326	5.54741	4.26109	1.85738	-0.907972	5.94184
	72.5	8.42987	8.74699	14.5079	18.1114	-0.424136	1.58808	5.32785	23.2465	20.9076	1.62798	8.42691	7.70725	21.0881	11.2992	5.54386	11.3363	8.42551	23.0455	25.5581	-0.880825	13.6158	10.5889	-0.855216	9.41345	12.6907	0.608566	-0.397693	11.4183	0.888242	9.77271	0.57045	7.35819	4.49085	1.94516	-0.234494	8.34752
	73	11.4094	13.0759	20.5998	24.4574	-0.890203	1.82246	9.12813	29.7021	29.3919	2.03669	10.5807	10.5579	29.1728	16.1299	8.75572	12.3319	12.1157	30.5294	35.7069	-1.03448	15.5466	13.7195	-0.553544	12.8037	14.6365	1.14329	-0.675727	15.2959	1.34227	10.4426	1.17144	9.17241	4.24859	1.95443	0.0258623	10.3696
	73.5	13.4265	17.3576	27.0615	31.4862	-0.497906	1.08168	12.8554	36.5875	37.6122	2.50583	12.1287	12.6776	37.8395	20.1164	11.7077	12.6556	15.2533	37.198	45.9249	-0.694315	16.8091	16.9006	-0.324457	16.3193	16.1649	1.90654	-0.163123	20.4803	1.41427	10.9102	1.59945	11.8247	4.47914	2.42357	0.137122	12.2553
	74	14.1379	21.1789	33.3063	37.3613	-0.020116	0.694812	16.1612	43.5118	43.8097	2.98388	12.3281	14.2881	45.882	23.1081	13.7821	12.5469	18.112	43.6728	54.127	-0.134873	17.4196	20.0076	-0.0488733	21.269	17.0247	2.19907	0.154421	26.2341	1.12762	11.322	1.70988	15.2003	4.50728	2.4216	0.42045	13.4302
	74.5	14.1941	24.5029	38.8195	39.3705	0.349085	0.728902	19.463	49.0956	47.0122	3.38046	12.5822	15.3412	52.186	23.6396	14.8115	12.6207	20.7971	49.1447	57.7644	0.571516	17.4666	23.9645	0.749389	26.8868	17.009	2.21646	0.135959	30.9699	0.549974	11.8708	0.98436	19.2608	4.04463	2.77689	0.738769	15.6351
	75	13.659	27.5829	42.6211	38.2744	0.579881	0.427743	21.9408	52.8299	46.7457	3.66748	13.0715	15.3245	56.436	21.259	14.3432	12.6301	23.3741	51.8249	56.1397	1.68747	17.5784	29.7544	1.65401	32.713	17.1661	2.21874	0.784505	35.2179	0.411945	12.6415	0.609059	25.1583	4.02527	3.87702	0.941519	19.9954
	75.5	12.5951	30.437	43.2645	34.6919	0.719855	0.692245	23.1841	53.9276	42.0273	4.26964	12.9343	14.7976	57.6777	17.2843	12.431	12.4788	26.3764	51.4945	50.1112	2.21018	17.5945	36.7773	2.32061	38.5825	17.259	1.71551	1.73706	37.6079	0.479709	12.8624	0.984496	32.3416	4.06574	4.2532	1.03766	25.5692
	76	12.0007	32.1366	40.6561	27.6324	0.454324	1.11918	23.5016	51.3437	34.3954	4.87231	12.465	14.5238	54.9683	12.5409	10.1251	12.2436	28.9647	48.4912	41.2108	1.86095	16.7738	44.6363	2.23973	43.1696	16.7415	1.24553	2.04733	36.1136	0.545499	13.4362	1.31372	39.2933	3.84194	4.29306	1.22305	32.4596
	76.5	11.9308	32.1501	36.0797	19.4391	-0.0219665	1.26189	22.8555	44.9399	25.9251	5.37341	12.4111	14.27	48.9732	8.0782	7.64108	11.866	30.517	42.5213	30.6927	1.28957	15.9234	51.8137	1.86504	44.9238	16.3024	1.19331	1.83167	32.2898	1.1857	15.1472	1.55317	45.0057	3.60441	4.91961	1.24995	40.8773
	77	11.5709	30.8835	29.9575	12.9761	-0.35191	1.56678	20.9059	36.5068	17.4522	5.82278	12.1441	13.9133	40.3128	4.649	5.16115	11.2691	30.951	34.5599	20.1325	0.824582	15.658	55.2212	1.60592	43.4956	16.4834	1.18835	1.85699	26.9494	1.73983	16.91	1.95521	48.4618	3.29891	4.91489	0.746358	47.5937
	77.5	11.4013	28.7406	22.793	7.8117	-0.114832	1.54379	20.5045	27.2625	10.8157	5.69547	11.2715	13.8075	30.0926	2.57013	3.44917	10.8409	29.8566	26.4422	12.3432	0.268725	15.536	54.0402	0.777804	38.8633	16.2028	1.35808	1.54096	19.8222	1.7759	19.0191	2.10748	48.0131	3.36203	4.28889	0.641716	50.4646
	78	11.7116	25.3863	16.4181	4.09053	0.159878	0.835591	22.2989	18.5832	6.4723	5.47552	10.593	13.7361	20.4006	1.37218	2.12078	10.2534	26.957	19.3458	7.30461	0.162383	15.2722	48.6192	0.0755148	31.7658	15.5958	1.86803	0.856036	13.1672	1.79112	21.9567	1.2706	43.3542	3.47446	4.20651	0.71473	50.2561
	78.5	11.5933	21.489	11.5466	2.53976	0.361854	0.5789	24.148	11.3861	4.01051	5.67152	10.4306	13.3235	12.3264	0.801217	1.01535	9.65183	23.4419	13.4949	3.04353	0.536988	15.5089	38.7534	0.320287	23.521	15.5313	1.81928	-0.206031	8.44456	1.50519	24.617	0.408307	35.4151	3.37413	3.94376	0.507008	45.8146
	79	11.2807	18.7369	7.49112	1.82341	0.634571	0.675308	26.3043	6.08174	2.63935	6.01744	10.3414	13.2123	6.34799	0.633004	0.564301	10.0794	20.2244	9.11053	0.662318	1.06593	15.7257	27.5611	0.412976	16.1046	15.4111	1.19359	-0.441191	4.92868	0.980493	25.4375	0.151793	26.2477	3.35801	3.28456	0.692522	37.2052
	79.5	11.1544	17.7482	4.48136	0.835776	0.810677	0.265056	29.075	2.83403	1.95659	6.3368	10.5762	13.892	2.66971	0.546988	0.402984	10.5185	17.4404	6.18293	0.73034	0.901545	15.7179	18.4986	0.0264585	10.3294	15.0359	0.900342	-0.223924	2.74133	0.465755	24.3367	0.0861359	17.6474	3.76345	2.95667	1.26365	27.6438
	80	10.8798	19.5238	2.73023	0.255209	0.752629	0.370264	28.9334	1.30197	1.27441	7.91059	11.1432	16.178	0.947797	0.19866	-0.00973159	10.3823	16.0927	4.05432	0.709221	0.431979	15.5467	11.1672	0.285549	5.8722	14.839	0.581614	-0.389593	1.69742	0.023272	21.5748	0.0127154	10.4982	3.51469	2.61318	1.13275	19.1339
	80.5	10.6242	24.861	1.74486	-0.22169	0.86505	0.920483	27.5345	0.831783	0.892514	10.7043	11.859	21.9011	0.552994	0.124766	-0.138303	11.0923	17.7896	2.72116	0.214754	0.0149333	15.1633	5.93518	0.605653	3.04725	14.8531	0.294171	-0.460888	1.00867	0.0157843	17.5926	0.305629	5.60229	2.96735	1.7258	0.875726	12.0617
	81	10.9707	32.4396	1.31825	-0.629565	1.12523	1.07066	29.5903	1.01204	0.658615	13.226	12.2854	31.9666	0.89242	0.480483	-0.0814305	12.0016	23.376	2.42698	1.02875	-0.539606	14.9092	3.75593	0.291537	2.14573	15.0566	0.441697	0.691724	0.759283	0.594912	13.0044	0.638253	2.79449	2.99684	0.818857	0.915807	6.68992
	81.5	11.5494	39.5211	1.55281	-0.267487	1.16298	0.728502	33.0079	1.76524	0.508354	15.1081	16.1018	44.8251	1.1399	0.453078	-0.314039	15.1364	31.279	2.23996	1.82402	-0.972839	15.2234	3.0856	0.375561	1.20391	16.3515	1.14859	1.49966	0.541094	0.828754	9.02847	0.825858	1.42853	2.98797	0.263189	0.704678	3.31165
	82	12.0845	43.9243	1.69042	0.468531	1.07463	0.619792	35.9373	2.54508	0.509969	16.4499	24.1336	57.7551	1.26284	0.415292	-0.269771	21.8597	39.3882	1.90576	1.40527	-0.327203	16.6783	2.23975	0.938144	0.296375	18.9008	1.5942	1.17691	0.366959	1.28683	6.24144	0.921653	0.872004	2.65704	0.0432592	0.285185	1.68321
	82.5	12.824	43.127	1.43692	1.09495	0.98483	0.403039	38.9393	2.2695	0.779841	15.7464	31.9602	67.697	1.43066	0.935754	-0.158584	28.864	45.8959	1.66118	1.11559	0.955551	23.9881	1.82865	1.2036	0.626054	25.9923	2.00717	1.58826	0.686518	1.91272	4.10588	0.88123	0.95052	2.69807	-0.0363029	0.211047	0.854803
	83	16.5667	36.2638	1.38104	1.37511	0.666497	-0.184368	39.5177	1.28374	1.32609	12.7208	38.6687	70.0119	1.22719	1.10489	-0.0274938	34.7971	48.2793	1.21038	1.35072	1.63953	38.3636	2.03694	0.936195	0.808933	38.8679	2.31211	1.98819	1.21585	1.73393	2.74188	1.14517	1.35486	3.09442	0.458931	0.507784	0.353932
	83.5	23.9396	26.2279	1.23337	1.30316	0.316378	-0.373365	33.8547	0.717249	1.72782	9.0044	45.1241	62.8933	0.975916	0.83119	0.490364	40.3148	43.7883	0.230437	0.759934	2.12555	53.7337	1.9019	0.875534	0.499199	52.5294	2.17924	1.32302	1.10545	1.42785	1.97886	1.33214	1.64149	2.80166	1.27724	0.924026	0.865582
	84	31.4832	16.0332	0.271329	0.921103	0.307418	0.129414	25.0014	0.43841	1.97201	5.39987	43.3212	48.9898	0.757204	1.10315	1.06102	39.0752	33.9732	-0.239311	0.133575	2.25477	67.3259	1.3501	0.947239	0.70581	63.6267	1.70469	0.553476	1.02931	1.44166	1.18657	1.11788	1.77128	2.26696	1.53196	1.04705	1.29937
	84.5	38.4387	7.5833	-0.266811	0.37366	0.415052	0.666156	16.1938	-0.402944	2.38149	2.56958	32.6187	32.9682	0.694714	1.17867	1.14019	30.2538	22.8702	-0.233497	0.281846	1.89454	78.2209	0.944138	0.743139	0.996696	71.6373	1.09483	0.691012	0.978925	1.07945	1.01868	1.03638	1.75008	2.39416	1.35606	1.15581	1.29439
	85	44.9374	2.45249	0.104366	-0.0313315	0.65424	1.25952	8.76731	-0.196909	2.49081	0.722503	22.6347	18.2331	0.717693	0.634238	1.4608	21.5371	12.8155	-0.0589098	0.486575	0.979579	76.7062	0.817203	0.64113	0.86588	70.4149	0.382761	0.579744	0.694415	0.46763	1.45584	1.27374	1.15678	3.28191	1.38528	1.72982	1.68771
	85.5	44.4491	0.596152	0.283668	0.0962649	0.848675	1.81622	3.30504	0.840384	1.8703	-0.21868	13.719	8.07794	0.926802	0.765916	1.93526	13.4807	5.21857	0.136264	0.35353	0.409324	61.0507	0.775483	0.819982	0.91915	57.1258	-0.589841	0.293603	0.519832	0.25584	1.7819	0.932618	0.428413	4.12117	1.19144	1.84049	1.44431
	86	35.7345	0.585923	0.195489	0.24274	0.935998	1.99155	0.893426	0.936173	1.62526	-0.391151	4.76639	2.96475	0.70432	1.35804	1.5809	5.23372	1.18869	0.433828	1.00357	0.141055	42.6343	0.810511	0.969895	0.886005	40.5107	-0.449937	0.461905	0.780523	0.00575601	1.90304	0.421923	0.225865	5.11344	0.821156	1.20441	0.549008
	86.5	25.904	1.12484	0.808554	0.237447	0.816086	1.72306	0.716972	0.78326	1.80122	-0.0129846	1.1234	1.21702	0.788933	0.987968	0.801913	0.844864	0.446249	0.711514	1.63885	0.0636052	25.7318	0.710243	0.773547	0.961475	25.5123	0.307304	0.565771	1.15674	-0.137359	2.15681	0.75127	-0.0141861	6.56797	0.997542	1.0084	0.592323
	87	16.3807	1.46786	1.59103	0.497017	0.825986	1.28553	0.581266	0.90832	1.5294	0.0934647	2.04473	1.06368	1.06875	0.815775	0.529237	0.4631	1.1185	0.896004	1.60634	0.222438	10.5564	0.934003	0.593568	1.04155	12.1859	1.24041	0.273714	1.29346	0.0201864	1.90667	1.02423	-0.10406	6.71697	1.15264	0.899084	0.510725
	87.5	7.16858	1.48009	1.58176	0.831002	1.06952	0.627394	0.46193	0.861984	1.24818	0.515968	1.97667	0.909172	0.957121	1.05673	0.57413	-0.116871	1.60753	1.03196	1.50485	0.533889	1.77775	1.22426	0.0730828	0.892204	3.48828	2.23751	0.0104663	1.11891	0.372602	1.58427	0.513596	0.292877	5.35839	1.22125	0.0542815	-0.351358
	88	1.99877	1.42162	1.26999	1.22561	1.18576	0.61502	0.693347	0.85412	1.61648	1.28835	1.81156	0.79385	0.685057	0.649388	0.158006	-0.624505	1.67387	1.14545	1.69542	1.0191	0.229846	0.904097	-0.167263	1.04473	1.00287	3.33653	0.193173	0.933155	0.885133	1.26828	0.703487	0.574769	4.14351	1.64847	-0.357598	-0.0421361
	88.5	0.789564	1.42032	1.26528	1.54418	1.08898	1.0049	0.651339	1.09585	1.86197	1.52251	1.87109	0.815198	0.944056	-0.313797	-0.0395508	-0.503219	1.54675	1.23805	1.44129	1.64233	0.617553	0.749531	0.0412179	1.28377	0.806127	3.3301	0.397388	0.811772	1.62204	0.839951	1.47268	0.71188	3.22011	1.92241	0.307264	0.585707
	89	0.363314	1.31559	1.30162	1.68613	1.14118	1.05006	0.404967	0.853634	1.7857	1.60359	1.16326	1.07503	1.06955	-0.331518	0.681723	-0.0174189	1.08325	1.11854	1.25701	1.80791	0.847434	1.44763	0.471783	1.59514	0.511774	2.64694	0.811987	0.610284	1.8947	0.90699	1.26926	0.839515	1.9037	1.92311	0.820694	0.574587
	89.5	0.704743	1.19429	1.12633	1.93334	1.21945	1.14005	0.974491	0.859831	1.97582	1.48557	0.680547	1.309	0.536552	-0.138777	1.40294	0.555575	0.346692	1.15752	1.69773	1.37254	0.765032	1.62298	0.685688	1.86578	0.523299	1.76293	1.23813	0.655459	1.91702	1.05798	0.673329	0.67979	1.12452	2.32176	1.22742	0.982042
	90	0.89147	0.981465	1.08171	1.78769	0.336169	1.44711	1.1011	0.614433	2.09972	1.03748	0.588574	1.84936	0.173847	-0.227255	1.6147	1.04841	-0.0226657	1.33459	1.96148	1.14394	0.790106	1.27028	1.24144	1.78747	0.548884	0.686124	1.19381	0.872996	1.95275	0.77162	0.749066	0.633498	1.03425	2.20295	1.83756	1.70826
	90.5	0.708934	0.962104	1.28525	0.929213	-0.220432	1.50171	0.890808	0.00811448	1.68068	0.430223	0.471694	2.01379	0.184766	-0.00900885	1.7889	1.41243	-0.177358	1.46505	1.85907	0.660605	0.83581	1.54089	1.63727	1.4692	0.675312	0.252995	1.22665	0.703809	1.25776	0.67319	0.763852	0.609989	0.960441	1.4871	1.98623	1.17792
	91	0.916849	0.963997	1.31446	0.560638	0.237479	1.25163	1.43621	0.0139545	1.18833	0.445755	0.746837	1.6374	0.368926	0.609902	2.07885	1.76863	-0.0334609	1.52596	1.56391	-0.0981835	0.689205	1.96163	1.4005	1.24322	0.920747	0.158215	1.21034	0.422097	0.252287	1.12949	0.192899	0.508709	0.74524	1.48218	1.63827	0.609262
	91.5	1.25045	1.2654	1.14813	0.789444	0.453801	1.4093	1.74417	0.438945	0.702682	0.485399	0.910675	1.12205	0.199221	0.856719	2.02951	1.38126	0.392619	1.5485	1.23987	-0.0531835	0.817539	1.52114	0.943824	0.896743	1.00241	-0.0294866	0.767546	0.427813	0.146007	1.01272	-0.00324018	0.423174	0.640644	1.52771	1.24509	0.419372
	92	1.22923	1.59663	0.736591	0.493086	0.207325	1.54311	1.0605	0.585586	0.13219	0.474015	0.744864	0.698538	0.539455	0.818349	1.48847	1.20219	0.638075	1.23232	0.47825	0.314323	0.935455	1.38265	0.706885	0.711323	0.896183	0.109515	0.627497	0.244622	0.259912	0.789031	0.507271	0.516679	0.974442	1.18844	1.108	-0.0552287
	92.5	1.33206	1.61621	0.462172	0.322649	0.670199	1.2611	0.647004	0.501597	0.0270881	0.581228	0.894716	0.31162	1.06105	0.954747	1.0232	1.56533	0.487855	0.858079	-0.104465	0.241007	0.94668	1.63458	0.683985	0.859573	1.05687	0.799648	1.1789	0.319796	0.0832404	0.681996	0.843188	0.745607	1.42846	1.58109	1.23211	-0.299417
	93	1.88676	1.53105	0.702588	0.80479	0.954204	0.447464	0.236406	0.432331	0.218878	0.989117	0.889289	-0.114347	0.510322	0.930203	1.19421	1.28492	0.313153	0.565594	-0.221445	0.295065	1.32914	1.10745	0.424847	1.14378	0.860706	0.509337	1.17431	1.18366	0.822501	0.601504	0.846618	1.03427	1.54709	2.13707	1.71386	0.334198
	93.5	1.94552	0.400785	0.793762	0.595615	0.57821	-0.556406	-0.368554	-0.197138	0.471222	0.912216	0.580366	0.405669	-0.791398	0.177097	1.58838	0.552592	-0.42578	0.314238	-0.130293	0.134529	0.996504	0.111698	0.609876	0.607266	-0.0459979	0.323737	1.39881	2.32132	0.835472	-0.18281	1.25042	1.11413	1.71474	1.6163	1.92868	1.21165
	94	2.03393	-0.265018	0.916744	0.29576	0.544957	-1.2904	-0.683865	-0.807518	0.834324	0.73689	0.659365	0.778251	-1.07402	-0.198106	1.47519	0.554236	-1.01068	0.296129	-0.183317	-0.15176	0.690059	-0.213062	0.794439	0.237184	-0.169198	0.706637	2.01414	2.79095	0.558468	-0.645165	1.52985	1.43402	1.96642	1.65484	2.31386	1.47154
	94.5	1.54862	-2.717	1.06727	-0.403783	0.803893	-2.71094	-0.308985	-1.81665	1.59339	0.472933	0.833548	2.07199	-2.69807	-1.68406	2.32933	-0.474313	-2.51134	0.339177	-0.0656512	-1.02773	-0.602205	-1.31112	1.42962	-1.64968	-1.42937	0.9764	3.01958	4.40742	-1.09246	-1.77701	1.89583	1.488	2.13679	0.784773	2.35633	2.61134
	95	0.326663	-2.341	0.476232	-0.53288	0.471928	-1.72527	0.17393	-1.20616	1.00637	0.00280232	0.390328	1.57444	-2.00586	-1.60506	1.40526	-0.864949	-1.85689	0.17722	-0.0156078	-0.802183	-0.979038	-1.18294	0.839324	-1.86147	-1.3427	0.505289	1.75025	2.61165	-1.41269	-1.36794	1.03073	0.485357	0.984362	-0.32138	0.905718	1.5682

## Sheet: Melt Curve Peak Results
	Well	Fluor	Target	Content	Sample	Melt Temperature	Peak Height	Begin Temperature	End Temperature	Well Note
	A01	SYBR	GAPDH	Unkn		85	44.9374	80.5	89
	A02	SYBR	SAUR10	Unkn		82	43.9243	79.5	85.5
	A03	SYBR	SAUR12	Unkn		75.5	43.2645	70	81
	A04	SYBR	SAUR16	Unkn		74.5	39.3705	70.5	80.5
	A05	SYBR	SAUR73	Unkn		None	None	None	None
	B01	SYBR	GAPDH	Unkn		None	None	None	None
	B02	SYBR	SAUR10	Unkn		83	39.5177	80.5	86.5
	B03	SYBR	SAUR12	Unkn		75.5	53.9276	70.5	80.5
	B04	SYBR	SAUR16	Unkn		74.5	47.0122	70.5	81.5
	B05	SYBR	SAUR73	Unkn		None	None	None	None
	C01	SYBR	GAPDH	Unkn		83.5	45.1241	79	86.5
	C02	SYBR	SAUR10	Unkn		83	70.0119	79	87.5
	C03	SYBR	SAUR12	Unkn		75.5	57.6777	69.5	80.5
	C04	SYBR	SAUR16	Unkn		None	None	None	None
	C05	SYBR	SAUR73	Unkn		None	None	None	None
	D01	SYBR	GAPDH	Unkn		83.5	40.3148	78.5	87.5
	D02	SYBR	SAUR10	Unkn		83	48.2793	80	86.5
	D03	SYBR	SAUR12	Unkn		75	51.8249	70.5	83.5
	D04	SYBR	SAUR16	Unkn		74.5	57.7644	70.5	79
	D05	SYBR	SAUR73	Unkn		None	None	None	None
	E01	SYBR	SAUR71	Unkn		84.5	78.2209	81	88
	E02	SYBR	SAUR7	Unkn		77	55.2212	71	82.5
	E03	SYBR	SAUR42	Unkn		None	None	None	None
	E04	SYBR	SAUR82	Unkn		76.5	44.9238	70.5	82
	F01	SYBR	SAUR71	Unkn		84.5	71.6373	80.5	89
	F02	SYBR	SAUR7	Unkn		None	None	None	None
	F03	SYBR	SAUR42	Unkn		None	None	None	None
	F04	SYBR	SAUR82	Unkn		75.5	37.6079	70	82
	G01	SYBR	SAUR71	Unkn		None	None	None	None
	G02	SYBR	SAUR7	Unkn		None	None	None	None
	G03	SYBR	SAUR42	Unkn		None	None	None	None
	G04	SYBR	SAUR82	Unkn		77	48.4618	70	82
	H01	SYBR	SAUR71	Unkn		None	None	None	None
	H02	SYBR	SAUR7	Unkn		None	None	None	None
	H03	SYBR	SAUR42	Unkn		None	None	None	None
	H04	SYBR	SAUR82	Unkn		77.5	50.4646	71	83

## Sheet: Melt Curve Plate View Results
		1	2	3	4	5	6	7	8	9	10	11	12
A	Content	Unkn	Unkn	Unkn	Unkn	Unkn
A	Sample
A	Peak 1	85	82	75.5	74.5	None
A	Peak 2	None	76	None	None	None
B	Content	Unkn	Unkn	Unkn	Unkn	Unkn
B	Sample
B	Peak 1	None	83	75.5	74.5	None
B	Peak 2	None	79.5	None	None	None
C	Content	Unkn	Unkn	Unkn	Unkn	Unkn
C	Sample
C	Peak 1	83.5	83	75.5	None	None
C	Peak 2	None	None	None	None	None
D	Content	Unkn	Unkn	Unkn	Unkn	Unkn
D	Sample
D	Peak 1	83.5	83	75	74.5	None
D	Peak 2	None	77	None	None	None
E	Content	Unkn	Unkn	Unkn	Unkn
E	Sample
E	Peak 1	84.5	77	None	76.5
E	Peak 2	None	None	None	None
F	Content	Unkn	Unkn	Unkn	Unkn
F	Sample
F	Peak 1	84.5	None	None	75.5
F	Peak 2	None	None	None	None
G	Content	Unkn	Unkn	Unkn	Unkn
G	Sample
G	Peak 1	None	None	None	77
G	Peak 2	None	None	None	None
H	Content	Unkn	Unkn	Unkn	Unkn
H	Sample
H	Peak 1	None	None	None	77.5
H	Peak 2	None	None	None	None

## Sheet: Melt Curve RFU Results
	Temperature	A1	A2	A3	A4	A5	B1	B2	B3	B4	B5	C1	C2	C3	C4	C5	D1	D2	D3	D4	D5	E1	E2	E3	E4	F1	F2	F3	F4	G1	G2	G3	G4	H1	H2	H3	H4
	65	2593.93	2619.75	2496.42	2458.25	2296.35	2320.6	2594.03	2566.64	2487.6	2384.08	2577.72	2645.23	2569.75	2378.26	2351.91	2563.2	2627.39	2564.24	2534.09	2273.34	2748.66	2611.26	2295.01	2520.93	2721.33	2312.36	2285.43	2461.03	2309.22	2491.73	2284.08	2508.81	2374.57	2369.98	2296.75	2585.42
	65.5	2592.82	2619.95	2495.99	2457.47	2296.64	2320.75	2594.05	2566.99	2488.31	2382.63	2576.11	2644.97	2569.15	2377.39	2350.94	2561.78	2627.7	2563.82	2534.49	2273.55	2747.48	2610.48	2295.57	2520.18	2721.55	2312.17	2285.56	2460.4	2309.77	2490.09	2284.14	2507.57	2375.04	2370.67	2297.09	2584.82
	66	2591.71	2620.15	2495.57	2456.7	2296.92	2320.9	2594.07	2567.35	2489.02	2381.18	2574.49	2644.71	2568.56	2376.52	2349.98	2560.37	2628	2563.41	2534.9	2273.76	2746.29	2609.7	2296.13	2519.43	2721.78	2311.98	2285.7	2459.77	2310.32	2488.46	2284.21	2506.34	2375.5	2371.35	2297.44	2584.22
	66.5	2590.6	2620.35	2495.15	2455.92	2297.21	2321.04	2594.09	2567.7	2489.72	2379.72	2572.88	2644.45	2567.97	2375.65	2349.01	2558.95	2628.31	2562.99	2535.3	2273.97	2745.11	2608.93	2296.69	2518.67	2722.01	2311.8	2285.84	2459.15	2310.86	2486.82	2284.27	2505.11	2375.97	2372.04	2297.78	2583.61
	67	2589.49	2620.55	2494.73	2455.15	2297.49	2321.19	2594.11	2568.05	2490.43	2378.27	2571.26	2644.19	2567.37	2374.78	2348.04	2557.53	2628.62	2562.58	2535.71	2274.18	2743.92	2608.15	2297.25	2517.92	2722.23	2311.61	2285.97	2458.52	2311.41	2485.19	2284.33	2503.88	2376.43	2372.72	2298.13	2583.01
	67.5	2588.38	2620.75	2494.31	2454.38	2297.77	2321.34	2594.14	2568.4	2491.13	2376.82	2569.64	2643.93	2566.78	2373.91	2347.07	2556.12	2628.92	2562.17	2536.11	2274.39	2742.74	2607.37	2297.81	2517.17	2722.46	2311.42	2286.11	2457.9	2311.96	2483.55	2284.4	2502.65	2376.9	2373.41	2298.47	2582.41
	68	2587.27	2620.95	2493.88	2453.6	2298.06	2321.48	2594.16	2568.75	2491.84	2375.37	2568.03	2643.67	2566.19	2373.05	2346.11	2554.7	2629.23	2561.75	2536.52	2274.6	2741.56	2606.59	2298.37	2516.41	2722.69	2311.24	2286.25	2457.27	2312.5	2481.92	2284.46	2501.42	2377.37	2374.09	2298.82	2581.81
	68.5	2586.89	2621.72	2493.71	2453.35	2297.93	2322.06	2594.45	2569.63	2493.31	2374.21	2566.44	2644.13	2565.81	2372.3	2345.61	2553.54	2630.09	2561.85	2537.33	2274.92	2740.96	2606.96	2299.18	2515.93	2723.19	2311.49	2286.35	2456.42	2313.21	2480.79	2284.54	2500.72	2377.87	2374.69	2299.4	2581.33
	69	2586.87	2622.82	2493.57	2453.31	2297.64	2322.88	2595.2	2570.93	2495.07	2373	2565.37	2645.02	2565.47	2371.43	2344.96	2553.02	2631.64	2562.54	2538.37	2275.24	2741.16	2608	2300.18	2515.78	2723.66	2311.73	2286.46	2455.59	2314.01	2480.03	2284.96	2500.11	2378.47	2375.1	2299.91	2581.35
	69.5	2587.04	2624.34	2493.96	2453.63	2297.35	2323.63	2596.27	2572.16	2497.34	2371.86	2564.61	2646.13	2565.27	2370.47	2344.81	2552.26	2633.39	2563.19	2539.41	2275.66	2741.88	2609.41	2300.97	2516.03	2724.18	2312.14	2286.84	2454.76	2314.64	2479.05	2285.15	2499.67	2379.23	2375.46	2300.45	2581.82
	70	2587.36	2626.45	2494.18	2454.06	2297.27	2324.46	2597.74	2573.12	2499.26	2370.89	2563.45	2647.46	2565.05	2369.45	2344.49	2551.28	2635.53	2563.86	2540.14	2276.02	2742.37	2611.32	2301.66	2516.29	2724.5	2312.7	2287.17	2453.89	2315.35	2477.84	2285.84	2499.33	2379.74	2376.01	2301.14	2582.66
	70.5	2587.78	2628.78	2494.04	2454.24	2296.77	2325.27	2599.26	2573.13	2500.49	2370.03	2561.95	2648.63	2564.47	2368.71	2344.44	2549.99	2637.67	2564.17	2540.27	2276.43	2742.26	2612.79	2302.21	2516.56	2724.21	2313.26	2287.47	2452.97	2316.3	2476.16	2286.97	2499.08	2379.57	2376.06	2302.07	2583.42
	71	2587.8	2630.49	2493.31	2453.28	2296.58	2325.63	2600.76	2571.45	2500.33	2369.32	2560.67	2649.13	2563.18	2367.55	2344.12	2547.88	2639.13	2562.93	2538.96	2276.54	2741	2613.13	2302.8	2516.18	2722.75	2313.61	2287.83	2451.6	2317.01	2473.61	2288.06	2498.17	2378.96	2375.77	2302.79	2583.91
	71.5	2587.09	2631.2	2491.3	2451.05	2296.52	2325.35	2601.57	2567.52	2498.47	2369.01	2558.32	2648.39	2560.42	2365.91	2343.71	2544.4	2639.32	2559.43	2535.91	2276.75	2737.9	2612.22	2303.05	2514.92	2720.12	2313.93	2288.28	2449.68	2317.54	2470.28	2288.97	2496.76	2378.01	2375.28	2303.51	2583.18
	72	2585.14	2630.16	2487.54	2446.6	2296.57	2324.96	2601.45	2560.7	2493.44	2368.7	2554.96	2646.63	2555.3	2363.36	2342.42	2540.01	2638.17	2553.16	2529.87	2276.76	2733.02	2609.7	2303.37	2512.58	2715.88	2313.87	2288.32	2446.68	2317.85	2466.34	2289.73	2494.38	2376.25	2374.51	2304.14	2580.98
	72.5	2581.73	2626.87	2481.58	2439.1	2296.49	2324.39	2599.67	2550.76	2484.91	2368.11	2551.03	2643.51	2546.58	2358.95	2340.28	2534.68	2634.96	2543.66	2519.51	2277.15	2726.74	2605.27	2303.79	2508.78	2710.16	2313.66	2288.49	2441.93	2317.62	2461.71	2289.73	2491.2	2373.93	2373.49	2304.39	2577.32
	73	2576.74	2621.43	2472.86	2428.46	2296.98	2323.44	2596.08	2537.45	2472.4	2367.11	2546.41	2638.93	2534.09	2352.01	2336.74	2528.76	2629.8	2530.1	2504.19	2277.59	2719.48	2599.18	2304.17	2503.15	2703.3	2313.24	2288.72	2435.21	2317.03	2456.64	2289.25	2487.01	2371.83	2372.57	2304.43	2572.69
	73.5	2570.47	2613.81	2460.92	2414.58	2297.27	2322.69	2590.55	2521.01	2455.57	2366.07	2540.53	2633.05	2517.33	2342.94	2331.56	2522.45	2622.93	2513.24	2483.82	2278.11	2711.3	2591.55	2304.35	2495.93	2695.6	2312.49	2289.07	2426.45	2316.34	2451.3	2288.6	2481.91	2369.63	2371.48	2304.39	2566.98
	74	2563.51	2604.14	2445.84	2397.18	2297.45	2322.32	2583.28	2500.88	2435.11	2364.61	2534.47	2626.34	2496.36	2332.08	2325.17	2516.17	2614.6	2492.97	2458.61	2278.25	2702.78	2582.27	2304.48	2486.63	2687.24	2311.39	2288.9	2414.65	2315.67	2445.74	2287.71	2475.06	2367.38	2370.2	2304.27	2560.51
	74.5	2556.45	2592.71	2427.74	2377.79	2297.3	2321.94	2574.42	2477.7	2412.25	2363.1	2528.22	2618.86	2471.72	2320.22	2317.95	2509.89	2604.85	2469.76	2430.41	2278.22	2693.97	2571.41	2304.33	2474.55	2678.7	2310.33	2288.95	2400.35	2315.25	2439.96	2287	2466.57	2365.18	2369.01	2303.96	2553.39
	75	2549.41	2579.68	2407.31	2358.33	2297.13	2321.62	2563.95	2452.09	2388.68	2361.24	2521.87	2611.16	2444.53	2308.89	2310.59	2503.56	2593.81	2444.25	2401.69	2277.63	2685.31	2558.04	2303.72	2459.7	2670.23	2309.19	2288.68	2383.8	2315.07	2433.85	2286.68	2455.53	2363.28	2367.33	2303.55	2544.56
	75.5	2542.87	2565.19	2385.62	2339.96	2296.74	2321.44	2552.67	2425.32	2366.19	2359.39	2515.23	2603.62	2415.79	2299.23	2303.83	2497.28	2581.43	2418.42	2374.99	2276.62	2676.41	2541.45	2302.71	2441.86	2661.55	2308.18	2288.13	2365.45	2314.8	2427.38	2286.29	2441.23	2361.15	2365.22	2303.04	2533.18
	76	2536.76	2549.43	2364.56	2324.15	2296.46	2320.9	2540.92	2398.76	2347.12	2356.97	2508.98	2596.34	2387.47	2291.73	2298.24	2491.1	2567.5	2393.21	2352.06	2275.55	2667.83	2521.15	2301.5	2421.34	2653.05	2307.47	2287.03	2346.77	2314.58	2420.93	2285.69	2423.22	2359.25	2363.12	2302.5	2518.77
	76.5	2530.8	2533.31	2345.3	2312.51	2296.32	2320.36	2529.33	2374.57	2331.96	2354.54	2502.72	2589.09	2361.36	2286.65	2293.73	2485.06	2552.63	2370.4	2334.04	2274.8	2659.65	2496.96	2300.52	2399.13	2644.8	2306.88	2286.15	2329.73	2314.19	2413.79	2284.98	2402.14	2357.31	2360.87	2301.84	2500.54
	77	2524.85	2517.49	2328.73	2304.48	2296.46	2319.63	2518.23	2354.16	2321.18	2351.61	2496.6	2582.08	2338.93	2283.49	2290.59	2479.26	2537.18	2351	2321.35	2274.25	2651.83	2469.91	2299.63	2376.93	2636.67	2306.26	2285.18	2314.75	2313.4	2405.75	2284.13	2378.6	2355.65	2358.29	2301.32	2478.16
	77.5	2519.2	2502.59	2315.5	2299.31	2296.6	2318.84	2508.21	2338.19	2314.23	2348.79	2490.65	2575.15	2321.29	2281.8	2288.47	2473.78	2521.92	2335.88	2313.51	2273.98	2643.96	2442.47	2298.99	2356.15	2628.37	2305.66	2284.34	2303.03	2312.51	2396.82	2283.07	2354.3	2353.97	2356.04	2301.05	2453.52
	78	2513.39	2488.93	2305.83	2296.42	2296.56	2318.17	2497.41	2326.81	2310.01	2345.93	2485.3	2568.27	2308.77	2280.77	2287.08	2468.44	2507.59	2324.41	2308.59	2273.92	2636.3	2416.58	2298.83	2338.46	2620.51	2304.87	2283.7	2294.86	2311.64	2386.62	2282.15	2331.26	2352.28	2353.94	2300.65	2428.24
	78.5	2507.53	2477.27	2298.86	2294.9	2296.44	2317.95	2485.86	2319.38	2307.45	2343.26	2479.99	2561.45	2300.63	2280.32	2286.3	2463.51	2495.07	2316.33	2306.02	2273.74	2628.63	2394.52	2298.79	2324.56	2612.71	2303.87	2283.53	2289.59	2310.77	2374.92	2281.81	2311.46	2350.52	2351.85	2300.36	2403.94
	79	2501.83	2467.27	2294.13	2293.74	2296.2	2317.55	2473.22	2315.12	2305.81	2340.23	2474.85	2554.89	2296.1	2279.91	2285.97	2458.65	2484.11	2310.68	2305.25	2273.36	2620.79	2378.04	2298.53	2314.83	2604.98	2303.13	2283.8	2286.21	2310.17	2362.28	2281.66	2296.05	2348.89	2350.05	2300.09	2383.05
	79.5	2496.24	2458.23	2291.19	2293.08	2295.82	2317.33	2459.52	2312.97	2304.7	2337.22	2469.6	2548.1	2293.92	2279.67	2285.69	2453.42	2474.76	2306.98	2305.01	2272.77	2612.93	2366.68	2298.43	2308.21	2597.33	2302.64	2283.91	2284.45	2309.79	2349.79	2281.63	2285.14	2347.11	2348.53	2299.62	2366.92
	80	2490.69	2449.07	2289.45	2292.85	2295.41	2317.22	2444.52	2312.01	2303.83	2333.71	2464.22	2540.71	2293.11	2279.39	2285.59	2448.19	2466.42	2304.35	2304.49	2272.51	2605.1	2359.25	2298.42	2304.27	2589.92	2302.22	2284.06	2283.29	2309.69	2338.22	2281.57	2278.17	2345.21	2347.1	2298.91	2355.27
	80.5	2485.35	2438.17	2288.33	2292.81	2295.05	2316.9	2430.73	2311.48	2303.38	2329.14	2458.43	2531.37	2292.75	2279.44	2285.66	2442.93	2458.18	2302.79	2304.33	2272.34	2597.41	2355.16	2298.14	2302.07	2582.46	2302.05	2284.27	2282.67	2309.7	2328.41	2281.57	2274.29	2343.64	2345.99	2298.51	2347.55
	81	2479.98	2423.87	2287.61	2293.05	2294.53	2316.35	2416.54	2311.06	2302.91	2323.03	2452.33	2518.15	2292.44	2279.21	2285.7	2437.02	2448.04	2301.48	2304.11	2272.51	2589.91	2352.85	2297.89	2300.95	2575.02	2301.86	2284.37	2282.21	2309.6	2320.71	2281.25	2272.23	2342.17	2345.38	2298.01	2342.92
	81.5	2474.33	2405.8	2286.92	2293.33	2293.95	2315.89	2400.92	2310.38	2302.71	2316.01	2445.64	2498.97	2291.85	2279	2285.77	2430.58	2434.44	2300.34	2303.31	2272.85	2582.4	2351.16	2297.8	2299.89	2567.22	2301.53	2283.62	2281.9	2309.13	2315.32	2280.95	2271.26	2340.64	2345.12	2297.63	2340.54
	82	2468.42	2384.8	2286.06	2293.26	2293.39	2315.6	2383.58	2309.3	2302.38	2308.04	2435.64	2473.32	2291.32	2278.75	2285.98	2421.38	2416.72	2299.25	2302.44	2273.33	2574.42	2349.75	2297.45	2299.72	2558.4	2300.74	2283.01	2281.65	2308.74	2311.51	2280.44	2270.66	2339.22	2345.06	2297.33	2339.34
	82.5	2462.17	2362.7	2285.27	2292.87	2292.88	2315.29	2365.03	2307.98	2302.16	2299.87	2421.48	2441.74	2290.59	2278.52	2286.03	2408.64	2395.33	2298.43	2301.9	2273.08	2564.83	2348.85	2296.9	2299.44	2547.62	2299.95	2282.37	2281.47	2307.84	2308.96	2280.04	2270.28	2337.94	2345.04	2297.3	2338.72
	83	2455.15	2342.6	2284.61	2292.22	2292.43	2315.24	2345.06	2307.13	2301.56	2292.64	2403.84	2406.83	2289.94	2277.86	2286.13	2392.66	2371.51	2297.63	2301.27	2272.44	2549.41	2347.84	2296.32	2299.1	2531.58	2298.75	2281.43	2280.94	2306.93	2307.28	2279.53	2269.66	2336.48	2345.01	2297.06	2338.41
	83.5	2445.08	2326.95	2283.91	2291.55	2292.22	2315.42	2326.41	2306.66	2300.85	2287.28	2383.01	2373.19	2289.38	2277.46	2286.01	2374.04	2348.1	2297.28	2300.64	2271.48	2526.24	2346.85	2295.94	2298.69	2508.6	2297.7	2280.52	2280.33	2306.13	2306.13	2278.91	2268.94	2334.93	2344.54	2296.77	2338.23
	84	2431.13	2316.42	2283.48	2290.96	2292.07	2315.52	2311.72	2306.38	2299.85	2283.62	2359.93	2345.01	2288.95	2276.97	2285.63	2353.35	2328.55	2297.33	2300.52	2270.38	2495.95	2345.99	2295.43	2298.54	2479.43	2296.63	2280.12	2279.84	2305.47	2305.28	2278.24	2268.04	2333.71	2343.81	2296.17	2337.54
	84.5	2413.69	2310.64	2283.59	2290.66	2291.89	2315.27	2301.44	2306.27	2298.86	2281.76	2340.96	2324.58	2288.6	2276.39	2285	2336.05	2314.37	2297.45	2300.41	2269.31	2459.52	2345.49	2295.02	2297.97	2445.58	2296.02	2279.85	2279.3	2304.73	2304.85	2277.77	2267.2	2332.57	2343.07	2295.72	2336.98
	85	2392.89	2308.32	2283.62	2290.57	2291.64	2314.84	2295.31	2306.65	2297.52	2280.9	2327.36	2311.84	2288.24	2275.86	2284.47	2323.21	2305.53	2297.53	2300.22	2268.56	2419.61	2345.01	2294.67	2297.59	2409.24	2295.55	2279.45	2278.89	2304.42	2304.18	2277.17	2266.37	2331.21	2342.44	2294.97	2336.21
	85.5	2369.8	2307.68	2283.5	2290.62	2291.24	2314.02	2292.35	2306.36	2296.46	2280.89	2318.19	2305.65	2287.86	2275.67	2283.53	2314.44	2301.16	2297.5	2299.95	2268.29	2384.9	2344.65	2294.35	2297.09	2376.93	2295.66	2279.29	2278.59	2304.22	2303.4	2276.57	2266.06	2329.28	2341.71	2294.06	2335.37
	86	2349.64	2307.42	2283.36	2290.46	2290.81	2313.08	2291.54	2305.91	2295.61	2280.99	2313.54	2302.98	2287.36	2275.04	2282.64	2309.68	2299.75	2297.38	2299.77	2268.1	2359.15	2344.23	2293.86	2296.68	2352.73	2295.99	2279.1	2278.31	2304.17	2302.42	2276.26	2265.87	2327.06	2341.27	2293.22	2334.85
	86.5	2334.35	2306.99	2283.21	2290.39	2290.33	2312.1	2291.11	2305.46	2294.79	2281.2	2312.66	2302.13	2287.12	2274.42	2282.01	2308.64	2299.46	2297.06	2298.95	2268.11	2342.1	2343.85	2293.42	2296.19	2336.26	2296.01	2278.84	2277.79	2304.19	2301.49	2276.05	2265.83	2324.13	2340.83	2292.81	2334.72
	87	2323.72	2306.31	2282.54	2290.19	2289.97	2311.39	2290.78	2305.1	2293.85	2281.02	2311.75	2301.49	2286.55	2274.04	2281.78	2308.25	2299.06	2296.69	2298.22	2268	2333.06	2343.48	2293.09	2295.72	2326.9	2295.65	2278.59	2277.19	2304.26	2300.33	2275.51	2265.86	2320.68	2340.26	2292.21	2334.27
	87.5	2317.85	2305.57	2281.72	2289.88	2289.48	2310.83	2290.51	2304.57	2293.25	2281.06	2310.66	2301.03	2286.1	2273.57	2281.44	2308.13	2298.34	2296.18	2297.36	2267.86	2330.56	2342.91	2292.87	2295.17	2323.34	2294.75	2278.56	2276.54	2304.14	2299.6	2275.11	2265.87	2317.62	2339.68	2291.99	2334.29
	88	2315.95	2304.84	2281	2289.35	2288.92	2310.68	2290.27	2304.24	2292.53	2280.47	2309.79	2300.57	2285.61	2273.07	2281.25	2308.34	2297.51	2295.66	2296.68	2267.44	2330.2	2342.32	2292.98	2294.79	2322.49	2293.42	2278.52	2276.08	2303.86	2298.75	2274.91	2265.58	2315.33	2339	2292.09	2334.48
	88.5	2315.26	2304.14	2280.42	2288.66	2288.32	2310.16	2289.85	2303.69	2291.65	2279.84	2308.83	2300.21	2285.35	2272.98	2281.25	2308.66	2296.7	2295.04	2295.71	2266.83	2329.96	2341.99	2292.97	2294.11	2321.93	2291.57	2278.35	2275.6	2303.23	2298.34	2274.34	2265.31	2313.45	2338.05	2292.21	2334.28
	89	2314.98	2303.44	2279.73	2287.83	2287.82	2309.71	2289.64	2303.19	2290.7	2278.98	2308.01	2299.72	2284.69	2273.27	2281.17	2308.79	2296.02	2294.44	2295.23	2265.86	2329.56	2341.47	2292.9	2293.49	2321.64	2290.2	2278.09	2275.27	2302.3	2297.85	2273.56	2264.87	2312.14	2337.11	2291.79	2333.96
	89.5	2314.78	2302.83	2279.14	2286.97	2287.19	2309.11	2289.35	2302.82	2289.84	2278.27	2307.65	2299.13	2284.37	2273.28	2280.56	2308.67	2295.66	2293.9	2294.38	2265.11	2329.14	2340.6	2292.52	2292.52	2321.37	2288.96	2277.54	2274.96	2301.38	2297.42	2273.12	2264.51	2311.47	2336.09	2291.4	2333.66
	90	2314.28	2302.25	2278.59	2285.96	2286.71	2308.55	2288.71	2302.37	2288.74	2277.54	2307.28	2298.38	2284.13	2273.43	2279.83	2308.24	2295.62	2293.27	2293.55	2264.48	2328.79	2339.91	2292.18	2291.68	2321.11	2288.45	2276.91	2274.59	2300.4	2296.84	2272.81	2264.18	2310.92	2334.86	2290.54	2332.95
	90.5	2313.93	2301.82	2278.03	2285.28	2286.81	2307.69	2288.29	2302.24	2287.81	2277.25	2307.05	2297.34	2284.14	2273.46	2278.96	2307.64	2295.64	2292.57	2292.47	2264	2328.35	2339.26	2291.3	2290.77	2320.81	2288.19	2276.35	2274.13	2299.52	2296.62	2272.38	2263.87	2310.42	2333.96	2289.63	2332.11
	91	2313.53	2301.28	2277.32	2284.97	2286.8	2307.08	2287.74	2302.28	2287.08	2277.03	2306.76	2296.44	2283.93	2273.39	2278.04	2306.85	2295.75	2291.81	2291.73	2263.85	2327.97	2338.36	2290.63	2290.2	2320.42	2288.15	2275.7	2273.91	2299.17	2296.1	2272.12	2263.58	2309.97	2333.29	2288.63	2331.79
	91.5	2313	2300.82	2276.75	2284.64	2286.59	2306.4	2286.89	2302.17	2286.62	2276.79	2306.32	2295.72	2283.81	2272.9	2276.93	2305.96	2295.63	2291.06	2290.92	2263.99	2327.63	2337.4	2289.94	2289.54	2319.91	2288.03	2275.19	2273.68	2299.16	2295.56	2272.14	2263.36	2309.66	2332.46	2288	2331.46
	92	2312.32	2300.01	2276.21	2284.23	2286.4	2305.68	2286.12	2301.87	2286.38	2276.55	2305.89	2295.31	2283.67	2272.57	2276.08	2305.44	2295.39	2290.31	2290.54	2263.85	2327.15	2336.81	2289.66	2289.28	2319.44	2288.13	2274.89	2273.49	2298.99	2295.11	2272.03	2263.13	2309.27	2331.8	2287.35	2331.4
	92.5	2311.75	2299.27	2275.99	2284.13	2286.3	2304.92	2285.81	2301.62	2286.43	2276.3	2305.54	2295.02	2283.25	2272.07	2275.43	2304.7	2295.05	2289.84	2290.42	2263.72	2326.7	2335.97	2289.2	2288.78	2318.99	2287.86	2274.48	2273.39	2298.91	2294.76	2271.65	2262.82	2308.66	2331.19	2286.85	2331.47
	93	2310.94	2298.43	2275.68	2283.83	2285.75	2304.49	2285.47	2301.38	2286.3	2275.93	2305.01	2294.99	2282.75	2271.65	2274.97	2303.96	2294.92	2289.44	2290.58	2263.6	2326.17	2335.27	2289	2288.41	2318.43	2287.44	2273.77	2273.06	2298.8	2294.43	2271.22	2262.38	2307.88	2330.2	2286.07	2331.58
	93.5	2309.92	2297.87	2275.3	2283.4	2285.43	2304.5	2285.59	2301.26	2286.19	2275.37	2304.68	2295.01	2282.84	2271.23	2274.2	2303.47	2294.81	2289.26	2290.61	2263.46	2325.46	2334.93	2288.72	2287.74	2318.22	2287.35	2273.27	2272.17	2298.18	2294.24	2270.76	2261.81	2307.12	2329.18	2285.16	2331.1
	94	2309	2298.01	2274.88	2283.27	2285.14	2305.03	2285.79	2301.59	2285.81	2275.04	2304.39	2294.58	2283.44	2271.45	2273.43	2303.33	2295.34	2289.1	2290.72	2263.5	2325.2	2335.09	2288.38	2287.82	2318.41	2287.05	2272.31	2270.81	2298.04	2294.59	2269.98	2261.24	2306.16	2328.54	2284.13	2330.43
	94.5	2307.97	2298.31	2274.39	2283.15	2284.85	2305.83	2286.18	2302.09	2285.33	2274.65	2304.02	2294.15	2284.03	2271.54	2272.64	2303.02	2295.9	2288.95	2290.77	2263.67	2324.88	2335.21	2287.89	2287.67	2318.5	2286.66	2271.24	2269.3	2297.78	2294.94	2269.24	2260.42	2305.18	2327.63	2282.91	2329.56
	95	2307.55	2300.36	2273.91	2283.59	2284.41	2307.43	2286.09	2303.2	2284.39	2274.59	2303.63	2292.74	2285.84	2272.92	2271.32	2303.72	2297.57	2288.78	2290.79	2264.38	2325.68	2336.24	2287.1	2289.24	2319.66	2286.17	2269.59	2266.84	2298.95	2296.17	2268.25	2259.89	2304.19	2327.78	2281.96	2328.09

## Sheet: Quantification Amplification
	Cycle	A1	A2	A3	A4	A5	B1	B2	B3	B4	B5	C1	C2	C3	C4	C5	D1	D2	D3	D4	D5	E1	E2	E3	E4	F1	F2	F3	F4	G1	G2	G3	G4	H1	H2	H3	H4
	1	-6.31485	-4.14365	2.42738	-0.00843328	3.17059	-2.75809	-3.3524	3.49654	4.76853	8.55548	-2.16256	0.136345	0.192849	-1.90237	0.802689	-9.66959	-0.274071	4.3642	4.7995	1.50774	-9.97632	-0.639163	-1.58009	-3.02164	-5.34737	0.121964	-6.98273	-0.686817	-6.39999	-4.57261	-7.97665	1.19593	-6.01597	-4.38562	-7.22395	1.70989
	2	-1.49869	-3.49228	3.1455	1.08214	-1.02298	-4.26133	-0.133731	3.95649	-4.40468	1.85574	-2.65375	1.54413	-1.01959	0.595234	-0.858269	-8.59303	3.04547	0.405227	3.66403	1.44083	-6.05538	-4.46046	-1.15748	-1.51399	-2.41236	-2.89179	-7.53495	-2.3169	-8.31703	-4.85289	-5.23243	-0.620476	-3.37889	-2.87356	-4.19027	2.44469
	3	-1.66572	-1.42076	1.48306	3.71169	-6.06034	-3.47674	-2.84695	0.7475	-1.63699	0.429059	1.53664	0.162149	-2.45603	-0.958222	-1.20499	-6.68805	-1.80154	-3.05377	-3.41749	0.611138	-4.12044	-2.44162	-2.65498	-1.05802	-2.54261	-0.0924878	-1.72167	-1.27752	-6.23621	-3.35823	-0.989734	-1.49037	-3.17581	1.83502	-3.1426	-6.73637
	4	-1.96413	-0.741697	-0.309823	-1.08925	-1.04825	-4.83541	1.34495	1.6158	0.118656	-0.287432	-6.05635	-2.33533	-1.73482	-0.643177	0.644748	-3.0983	-1.44099	-0.646386	2.79772	-0.217948	-1.34208	-1.85645	-4.66455	-3.65255	-2.75033	-1.72551	-0.497383	0.158503	-4.65426	0.530776	-2.1908	0.52064	-3.58947	2.66422	-1.37059	1.49505
	5	1.56389	0.212492	2.05244	-0.22145	-3.88878	-2.43375	-0.460793	-1.85746	-1.08566	1.73107	-1.23421	2.99004	-1.43513	3.23455	-2.7133	2.226	-0.725046	4.98157	-2.9803	-4.41352	-0.419536	-5.49279	-3.37447	2.26071	-3.57723	-0.00473542	-2.60078	3.05188	2.16109	0.32956	-0.709815	1.29489	0.835483	1.37601	-1.91411	-1.01867
	6	-1.27199	1.21927	-0.41098	0.146972	2.3197	-0.597349	4.46754	-0.436228	0.722938	-2.23368	0.274145	0.110688	1.48169	-5.05177	-1.11221	-3.10161	0.333123	2.50947	1.70863	-0.2582	2.89736	-2.68591	-1.28125	1.75808	-0.233621	3.01893	-1.50826	-2.46932	-1.05665	-1.06768	-0.437545	2.21468	0.48771	-1.02891	-1.47049	1.51876
	7	-0.111529	0.358809	1.00409	-3.75973	-0.848237	0.634335	0.96622	1.49614	0.0315899	1.90289	2.09819	1.41288	0.717315	1.52282	-1.35371	1.63127	2.6535	1.49748	3.3869	0.463587	-1.38697	1.64793	-0.990582	0.399403	2.5038	-4.05827	2.24026	-0.705901	-2.85553	3.33394	2.01734	1.76577	2.62512	-2.27802	-2.54053	3.16135
	8	3.11497	2.97038	-2.44616	0.935186	0.559514	-1.68409	0.739037	-1.14717	0.445853	-1.78619	-1.497	-1.83475	1.17421	-3.44844	1.39125	-1.84143	4.9219	-1.75063	3.11919	4.85554	4.44122	0.983209	-0.198721	-2.1825	0.401768	-2.14051	1.51753	-2.5326	-1.54987	-1.64055	-3.28682	-1.97022	4.36797	0.720606	0.848236	-2.82408
	9	5.61803	-3.96563	2.27067	1.09278	-5.58065	4.92687	-4.63012	1.5351	-4.62396	0.903456	1.80044	-1.21597	-1.33893	0.811524	3.1751	-0.817447	-2.52809	-0.763391	2.37693	-0.694908	0.590797	3.62026	3.19557	-0.62129	3.87617	4.90713	0.413964	4.71404	1.92584	2.95902	2.20557	-0.0509565	-0.767289	5.37686	-1.99643	1.09347
	10	2.12393	0.106033	-1.04812	2.28804	-0.886137	4.14638	-0.925866	0.350905	2.90413	1.58064	-0.0330508	2.61045	1.68221	1.63888	2.78934	-2.05459	1.43491	-2.11877	-1.95484	1.5658	3.32853	0.10202	-2.61555	1.33388	1.05033	2.82672	3.70271	-0.912696	2.40278	4.50687	-3.67744	2.60413	-2.35207	5.83771	-5.51127	2.65668
	11	-4.90827	2.99358	2.27413	0.0515928	2.11378	-0.0272548	-3.36281	-0.608982	0.451755	4.21801	0.936223	2.33438	4.61288	2.59732	1.02278	2.06045	2.19117	1.24898	-1.01323	-2.24784	0.398451	-0.246704	5.26433	-1.34002	-0.170093	-0.791395	-0.505221	-1.88487	2.38005	-2.8355	1.77585	-2.01346	-1.17509	6.49677	3.40043	1.98458
	12	3.3546	-2.2066	-2.62237	2.30079	3.89023	-1.46529	4.24884	0.653822	-1.72586	-4.4545	2.1805	-3.9646	2.65114	0.426575	2.03185	-0.281996	-0.289112	-3.07741	-2.95193	1.34156	-1.16444	1.06165	2.16203	-0.488691	0.134791	1.81008	-2.5295	-0.0423904	-2.43016	-2.73359	-3.77818	-0.212362	-3.31127	4.7999	-2.00909	0.40476
	13	2.56908	-0.910251	0.765768	-3.53872	2.24639	-0.548378	-3.58024	0.495265	6.36814	2.04898	-0.821987	2.22878	-0.67901	0.517562	6.52489	2.8858	0.689938	5.04951	0.948051	-0.448251	0.0741611	3.39557	-1.88581	1.32208	5.55584	3.58313	1.54794	0.0637145	3.20205	2.97006	-0.389949	4.165	0.035697	2.23656	0.210381	0.850958
	14	1.1401	0.67501	-1.85607	3.31179	4.95643	0.986124	4.99086	0.139792	2.32482	-0.521808	0.922996	2.12474	1.44887	2.92226	-0.672854	1.22805	-1.43434	-0.158244	1.24498	-1.60534	1.19515	4.07218	4.24402	2.17341	0.0476644	-1.13937	0.0495073	2.86565	1.62717	1.40074	0.565737	2.88767	4.22402	-2.03682	3.55913	-0.768881
	15	1.38015	-2.50037	-1.13741	1.04947	1.1038	-2.96351	-0.154597	1.38966	1.26551	-2.01529	2.45715	-0.137331	1.07832	-2.83862	0.663914	2.10678	-0.139294	-1.94595	-2.06116	-3.2773	-1.39332	-1.08989	4.08814	2.83977	4.41532	0.147862	-1.56679	-0.74892	1.26283	1.3577	1.60024	1.3085	-0.766605	2.10646	4.2262	4.33182
	16	1.85811	3.75427	0.0807472	1.37757	-1.36748	-1.27235	0.722611	4.51842	1.7847	1.89753	2.71587	2.37393	-1.37022	3.06519	-0.931835	5.65645	0.405905	1.28857	-1.51314	-0.963099	2.83099	4.01941	0.763062	1.67801	-0.842988	-1.06455	-2.55256	-0.72163	0.595421	-0.684517	-2.57342	-4.2156	5.59268	1.09429	2.97243	3.67362
	17	-1.92582	-0.630183	-0.200055	1.58782	0.553911	-2.34144	0.0357122	-1.76773	1.10628	-3.03991	6.59058	-3.46411	-0.123708	0.262699	-1.05425	4.23441	-0.246255	0.776303	-0.243836	4.86192	2.39958	0.487323	1.01493	2.38439	2.43419	1.72188	0.709404	5.49938	0.401884	4.46767	2.62976	-1.82399	-0.0155359	1.42344	1.37679	-3.95595
	18	2.28721	1.6527	-2.32216	-2.44967	3.94742	1.3628	2.26718	-2.85987	0.324161	2.20105	-1.46219	0.99411	0.833895	-0.0399033	-4.81974	4.99651	0.429978	-0.143946	4.69563	3.02014	2.29685	-1.37353	0.807079	1.93319	-0.0885227	-1.47531	-0.604074	0.503467	3.3246	-2.11192	2.08624	-3.24529	5.64612	-3.29671	4.88439	-0.538438
	19	1.86965	2.30438	3.53878	-2.18745	2.80331	5.50089	-2.43174	-2.78028	-1.4057	0.326919	-5.01638	1.41469	-1.61464	0.286798	2.23785	2.40419	0.212645	-2.70834	1.85044	-0.10978	-0.225484	2.85416	1.09799	2.2189	-1.03297	-0.649014	2.23697	-1.75709	4.02561	0.475479	1.63448	-0.445937	0.207494	-0.468892	0.606346	0.262551
	20	-1.58437	2.11447	-0.398276	1.57388	-1.5349	-0.368617	-0.567022	2.3213	-1.82009	0.465626	1.96189	1.57345	0.553494	-3.60593	-2.8819	0.693489	-2.13539	-1.49862	-3.25771	-0.610241	-1.66929	1.03332	-2.83297	-4.39991	2.84886	0.756318	2.07986	-0.611252	3.93675	-2.61915	0.15738	-0.355104	-0.928982	0.82093	1.31246	-1.44806
	21	-0.226686	-1.25753	1.79378	2.06016	0.89849	2.92819	2.49341	-1.68988	-2.97085	-1.99993	-1.60615	-1.51698	-4.84141	2.41603	-1.58387	1.41588	-1.01109	-1.53793	-2.23675	-1.09747	1.02904	5.05049	5.20508	-0.839771	1.19392	-1.73123	0.357721	2.33592	2.59911	5.29383	1.1263	0.61764	0.681918	-3.38625	4.4646	-1.46224
	22	-2.64282	2.14207	-4.35364	-2.71436	0.0307245	2.96263	-1.12759	-0.190748	-2.29464	-1.50679	-4.14953	-2.43833	-1.50361	0.981351	-3.29808	-0.440388	-1.37398	4.98548	-3.82151	2.72826	-4.76829	2.68929	1.33964	2.14067	-1.17153	2.98764	0.581637	0.363677	0.813771	-2.41687	0.477259	-1.08121	-5.17677	-0.439972	2.77636	-2.58297
	23	-5.4399	0.335404	0.0481798	0.809363	3.04388	-2.49882	0.855286	-4.10993	-0.303033	-2.85503	-0.142506	-1.08288	2.32094	1.75636	2.76035	2.06986	-0.973414	-2.70795	1.99987	4.13504	0.586583	-2.59034	-3.53631	-2.29492	1.81728	2.05249	-1.38915	1.9034	1.43505	-1.07826	1.48498	1.115	2.69397	-2.12262	-0.476045	-0.111663
	24	-4.04129	-2.73383	0.265891	-2.04492	1.99274	5.07152	1.70663	-1.41381	-0.927278	-4.96512	-0.857148	0.481863	-2.54746	-2.45359	-1.80769	-2.10071	5.10789	-1.01143	3.02053	0.228442	-1.02828	-1.6768	-1.0886	0.476278	-1.59997	-1.76376	-1.84932	-4.23692	-3.19021	-0.279946	4.2827	2.98101	0.372823	-0.189342	-0.0327291	3.32
	25	-3.20823	0.416815	1.20861	-5.05653	2.36229	2.5682	3.50455	-0.861505	0.104635	3.37972	1.37494	2.80969	1.55404	-1.15176	1.72621	2.54049	-1.17182	1.06703	1.05603	0.46373	-0.472845	1.59078	1.96506	0.669078	-0.506378	-3.34359	3.84671	-0.171441	-0.359175	-3.13734	1.88428	-3.67426	5.31227	-1.17412	2.89663	-0.0356613
	26	-1.692	-1.7979	2.74276	-4.43854	1.94191	4.99724	-2.2197	2.37315	1.16357	-0.0726782	-1.35181	-4.39676	1.93285	-2.23227	-3.90621	0.42204	-1.73199	2.85651	-0.513967	-3.73178	-2.5484	-3.24261	-4.16175	-4.71333	-4.13348	0.534299	-4.30614	3.56505	-0.105929	-0.0899833	4.06319	-2.37411	-1.59847	-5.23764	-0.343153	-2.46976
	27	-4.30541	-2.44851	2.2648	-2.66419	0.271958	1.08665	-0.460885	5.54192	0.932918	2.91949	0.709169	-1.23961	3.45509	0.0555435	-0.781577	-1.11761	-2.34413	-0.181501	-1.59838	2.09349	0.979261	0.288674	-1.75283	-1.42947	-4.47327	0.335263	-1.07004	-3.523	0.752951	0.0377868	-1.08285	1.21486	-3.70855	-7.35396	-0.978364	-0.208616
	28	1.69548	1.88627	10.2825	0.0576548	-0.331181	0.897951	-2.62112	7.35643	0.504369	1.99285	-0.426392	-1.16088	4.9256	2.1584	-1.08798	-6.31352	2.12012	4.48731	1.84213	-1.7731	-0.6356	1.78101	3.31141	0.802223	-1.91983	-0.310312	5.37406	-4.50811	-3.18859	-2.62202	2.92296	-2.99499	3.55723	-1.8696	0.043745	-3.10365
	29	-1.75983	0.209777	14.9585	0.267597	-0.00225928	2.40604	3.34511	19.9808	0.286587	-0.945966	-0.799727	2.87636	12.1955	0.28919	-1.80242	-3.23827	2.49421	8.03752	0.429701	-1.80121	0.378929	-2.71083	2.64256	1.11325	0.646478	-1.91784	1.06188	1.43686	1.68079	-0.272839	-2.19751	1.31741	-1.48665	-8.62902	4.06273	0.523399
	30	-2.29493	4.85963	27.2114	-1.86265	-0.751257	4.84832	8.33957	35.3804	0.792901	-1.47847	4.49567	3.44219	23.385	2.65636	-0.820139	-3.37041	4.07822	21.5569	0.85772	-2.60321	3.78782	-4.38764	4.23606	1.43928	5.44927	2.44716	5.12669	2.45099	1.34261	0.43403	1.75688	1.03984	-2.0184	-8.8642	0.850341	3.29777
	31	-0.764864	15.6648	58.4132	-0.36433	-2.72311	2.18675	17.1073	63.3786	3.52154	3.57723	-2.4391	7.94012	36.8088	-2.00042	1.48968	-3.46436	14.9858	40.7835	5.74515	1.11667	3.86877	1.05028	0.779638	1.25081	7.06906	1.4582	1.75981	1.95237	-0.456574	1.27205	2.4092	5.49597	-0.158005	-3.70883	0.0440198	3.96644
	32	3.15706	28.5858	97.9	6.40736	-2.86653	-4.11661	35.3832	112.129	11.5236	0.770732	3.31692	20.1303	65.7785	-0.792108	1.03859	-1.67693	30.7599	74.2661	13.603	-3.90725	14.5103	2.73953	-0.599705	9.21626	14.2511	-0.97646	-4.48609	-1.22859	2.08549	-4.67579	2.15557	3.70695	-2.40034	-6.31219	-1.82759	10.935
	33	12.9062	47.6227	142.678	6.22279	-2.45849	-1.38572	61.8258	163.399	24.8518	-1.06461	7.12672	40.0544	116.854	-1.46365	4.57218	4.68594	54.2799	123.42	23.0013	-2.79066	35.3046	10.0056	1.90121	17.5233	28.8514	-4.46378	3.8403	5.58512	-3.82912	4.56504	-1.05766	14.726	1.18357	-3.93116	-0.318682	25.0309
	34	17.9334	85.4393	181.881	13.39	1.55352	-2.65326	113.247	212.153	44.0317	2.36111	16.6422	85.07	170.642	1.71742	1.51573	5.21079	105.846	176.282	44.7474	-2.90954	63.7254	16.5999	-1.13552	29.5913	65.9251	-1.54564	1.64394	11.5172	0.671557	3.64106	-6.9148	32.9519	-0.572269	-4.92949	-3.12516	43.3481
	35	40.8997	143.731	210.423	33.2211	-4.63959	-3.47217	169.617	251.57	77.5333	6.07731	26.9749	144.232	222.02	3.87353	3.1827	16.6904	162.966	225.686	85.4971	2.45509	122.829	37.5173	-1.13321	56.6001	114.92	-1.85028	-1.39244	24.6686	-2.19139	11.2251	-1.33043	58.4636	0.908085	-5.06071	-3.6549	76.1194
	36	81.1453	203.238	229.413	56.2742	-0.58823	-1.80688	221.756	276.443	122.463	15.1583	51.6557	207.803	266.648	12.9197	7.60986	33.3119	222.839	261.794	133.369	-0.990821	194.065	75.7258	1.61732	100.261	179.173	0.00281565	-3.90352	44.2787	0.916288	23.7013	3.2942	103.149	5.75401	-3.91608	-1.56744	125.565
	37	134.208	256.59	238.46	98.5845	1.95075	-0.167454	262.481	290.65	160.927	34.6548	90.7486	270.547	296.542	26.7275	15.746	66.1216	272.248	283.668	180.006	2.2699	272.105	133.399	-2.79922	147.534	254.271	-0.486105	-0.746481	78.13	1.30032	52.3409	-1.65492	151.534	9.49579	1.72616	-2.37345	177.383
	38	177.882	295.673	241.234	135.612	3.49027	-2.70988	288.512	295.673	193.438	54.7028	149.805	317.995	313.315	43.0998	34.1137	123.695	307.661	294.921	219.593	0.218261	344.675	196.394	-2.25845	193.173	325.196	-0.409165	-1.98212	127.504	-3.39081	94.1694	-4.51336	202.098	20.5367	5.51465	1.92279	225.952
	39	214.59	318.87	241.458	165.144	0.0717993	-0.333477	306.516	298.084	213.302	72.4157	200.273	352.271	321.195	82.4331	54.0727	177.621	330.023	301.063	247.809	1.01941	397.688	259.424	-1.24374	232.363	378.919	-2.13296	-2.11184	174.3	-0.730588	158.737	1.08517	242.711	38.7969	11.684	-1.17175	262.356
	40	245.915	333.549	240.51	190.977	-4.2938	-2.52142	318.953	299.04	226.747	87.9758	242.155	378.612	327.316	125.646	66.5611	227.9	347.099	303.855	268.99	3.01731	436.477	317.071	-2.46527	261.536	419.855	10.5158	0.965832	218.519	-1.18747	225.158	-2.49609	275.235	55.2425	30.503	-0.807793	289.051

## Sheet: Quantification Cq Results
	Well	Fluor	Target	Content	Sample	Biological Set Name	Cq	Cq Mean	Cq Std. Dev	Starting Quantity (SQ)	Log Starting Quantity	SQ Mean	SQ Std. Dev	Set Point	Well Note
	A01	SYBR	GAPDH	Unkn			34.4714	34.4714	0				0	60
	A02	SYBR	SAUR10	Unkn			32.0091	32.0091	0				0	60
	A03	SYBR	SAUR12	Unkn			30.0496	30.0496	0				0	60
	A04	SYBR	SAUR16	Unkn			34.775	34.775	0				0	60
	A05	SYBR	SAUR73	Unkn				0	0			0	0	60
	B01	SYBR	GAPDH	Unkn				0	0			0	0	60
	B02	SYBR	SAUR10	Unkn			31.6376	31.6376	0				0	60
	B03	SYBR	SAUR12	Unkn			29.5701	29.5701	0				0	60
	B04	SYBR	SAUR16	Unkn			33.2038	33.2038	0				0	60
	B05	SYBR	SAUR73	Unkn			36.6976	36.6976	0				0	60
	C01	SYBR	GAPDH	Unkn			35.0723	35.0723	0				0	60
	C02	SYBR	SAUR10	Unkn			32.4331	32.4331	0				0	60
	C03	SYBR	SAUR12	Unkn			30.4004	30.4004	0				0	60
	C04	SYBR	SAUR16	Unkn			37.1241	37.1241	0				0	60
	C05	SYBR	SAUR73	Unkn			37.7085	37.7085	0				0	60
	D01	SYBR	GAPDH	Unkn			35.7261	35.7261	0				0	60
	D02	SYBR	SAUR10	Unkn			31.8732	31.8732	0				0	60
	D03	SYBR	SAUR12	Unkn			30.3746	30.3746	0				0	60
	D04	SYBR	SAUR16	Unkn			33.2648	33.2648	0				0	60
	D05	SYBR	SAUR73	Unkn				0	0			0	0	60
	E01	SYBR	SAUR71	Unkn			32.6853	32.6853	0				0	60
	E02	SYBR	SAUR7	Unkn			34.5813	34.5813	0				0	60
	E03	SYBR	SAUR42	Unkn				0	0			0	0	60
	E04	SYBR	SAUR82	Unkn			33.9311	33.9311	0				0	60
	F01	SYBR	SAUR71	Unkn			32.9937	32.9937	0				0	60
	F02	SYBR	SAUR7	Unkn				0	0			0	0	60
	F03	SYBR	SAUR42	Unkn				0	0			0	0	60
	F04	SYBR	SAUR82	Unkn			35.2086	35.2086	0				0	60
	G01	SYBR	SAUR71	Unkn				0	0			0	0	60
	G02	SYBR	SAUR7	Unkn			36.1766	36.1766	0				0	60
	G03	SYBR	SAUR42	Unkn				0	0			0	0	60
	G04	SYBR	SAUR82	Unkn			33.77	33.77	0				0	60
	H01	SYBR	SAUR71	Unkn			38.4503	38.4503	0				0	60
	H02	SYBR	SAUR7	Unkn			39.9074	39.9074	0				0	60
	H03	SYBR	SAUR42	Unkn				0	0			0	0	60
	H04	SYBR	SAUR82	Unkn			33.2036	33.2036	0				0	60

## Sheet: Run Information
File Name	NTC.pcrd
Created By User	admin
Notes
ID
Run Started	07/30/2025 02:55:56 UTC
Run Ended	07/30/2025 04:02:14 UTC
Sample Vol	10
Lid Temp	105
Protocol File Name	Mei5Bio-2step.prcl
Plate Setup File Name	NTC.pltd
Base Serial Number	CT022697
Optical Head Serial Number	785BR15045
CFX Maestro Version	5.2.008.0222.
