# Supplementary material for: Genome-wide identification of SMALL AUXIN UP RNA (SAUR) gene family and its expression profiles in response to abiotic stress and auxin in tea plants ( Camellia sinensis )
Source: PeerJ journal article supplement (doi:10.7717/peerj.20681), 2026-01-30
Supplement: PCR_Amplification_Efficiency.xlsx [file PCR_Amplification_Efficiency.xlsx]

## Sheet: PCR efficiency
Target	Sample	Cq				Average
GAPDH	0H-5	17.3311		GAPDH	5-1	17.3201
GAPDH	0H-5	17.257			5-2	19.8719
GAPDH	0H-5	17.3722			5-3	22.3143
GAPDH	0H-25	19.8899			5-4	24.2534
GAPDH	0H-25	19.8754
GAPDH	0H-25	19.8504
GAPDH	0H-125	22.2982			slope	2.3242
GAPDH	0H-125	22.3267			1/slope	0.430256
GAPDH	0H-125	22.318			R^2	0.9963
GAPDH	0H-625	24.2419			E	0.998645
GAPDH	0H-625	24.2692
GAPDH	0H-625	24.2492				Average
CsSAUR7	0H-5	26.5903		CsSAUR7	5-1	26.4968
CsSAUR7	0H-5	26.4437			5-2	28.5803
CsSAUR7	0H-5	26.4563			5-3	31.1422
CsSAUR7	0H-25	28.5388			5-4	33.1513
CsSAUR7	0H-25	28.5166
CsSAUR7	0H-25	28.6855
CsSAUR7	0H-125	31.162			slope	2.2525
CsSAUR7	0H-125	31.1845			1/slope	0.443951
CsSAUR7	0H-125	31.08			R^2	0.9979
CsSAUR7	0H-625	33.0165			E	1.04319
CsSAUR7	0H-625	33.3279
CsSAUR7	0H-625	33.1096				Average
CsSAUR10	0H-5	28.1903		CsSAUR10	5-1	28.2521
CsSAUR10	0H-5	28.1087			5-2	31.1464
CsSAUR10	0H-5	28.4573			5-3	33.215
CsSAUR10	0H-25	30.8616			5-4	35.1754
CsSAUR10	0H-25	30.7416
CsSAUR10	0H-25	31.836
CsSAUR10	0H-125	33.6762			slope	2.2839
CsSAUR10	0H-125	33.2635			1/slope	0.437848
CsSAUR10	0H-125	32.7053			R^2	0.9907
CsSAUR10	0H-625	35.855			E	1.02322
CsSAUR10	0H-625	34.8349
CsSAUR10	0H-625	34.8363				Average
CsSAUR12	0H-5	27.0852		CsSAUR12	5-1	27.0883
CsSAUR12	0H-5	27.0036			5-2	29.2938
CsSAUR12	0H-5	27.1762			5-3	31.6831
CsSAUR12	0H-25	29.2932			5-4	33.8794
CsSAUR12	0H-25	29.2693
CsSAUR12	0H-25	29.3189
CsSAUR12	0H-125	31.7927			slope	2.2762
CsSAUR12	0H-125	31.5628			1/slope	0.439329
CsSAUR12	0H-125	31.6938			R^2	0.9997
CsSAUR12	0H-625	33.7071			E	1.02805
CsSAUR12	0H-625	33.3831
CsSAUR12	0H-625	34.548				Average
CsSAUR16	0H-5	26.2351		CsSAUR16	5-1	26.3034
CsSAUR16	0H-5	26.2934			5-2	27.9455
CsSAUR16	0H-5	26.3817			5-3	30.803
CsSAUR16	0H-25	27.9012			5-4	33.6515
CsSAUR16	0H-25	27.952
CsSAUR16	0H-25	27.9832
CsSAUR16	0H-125	30.8543			slope	2.4902
CsSAUR16	0H-125	30.6855			1/slope	0.401574
CsSAUR16	0H-125	30.8693			R^2	0.986
CsSAUR16	0H-625	33.5986			E	0.908483
CsSAUR16	0H-625	33.6472
CsSAUR16	0H-625	33.7088				Average
CsSAUR42	0H-5	21.1906		CsSAUR42	5-1	21.2412
CsSAUR42	0H-5	21.2619			5-2	23.9138
CsSAUR42	0H-5	21.2713			5-3	26.0353
CsSAUR42	0H-25	23.9838			5-4	28.8429
CsSAUR42	0H-25	23.8758
CsSAUR42	0H-25	23.8819
CsSAUR42	0H-125	26.027			slope	2.4927
CsSAUR42	0H-125	26.0716			1/slope	0.401171
CsSAUR42	0H-125	26.0074			R^2	0.9974
CsSAUR42	0H-625	28.9043			E	0.907246
CsSAUR42	0H-625	28.8858
CsSAUR42	0H-625	28.7386				Average
CsSAUR71	0H-5	24.7921		CsSAUR71	5-1	24.7119
CsSAUR71	0H-5	24.6186			5-2	27.0663
CsSAUR71	0H-5	24.7251			5-3	30.0575
CsSAUR71	0H-25	27.054			5-4	32.0455
CsSAUR71	0H-25	27.025
CsSAUR71	0H-25	27.1198
CsSAUR71	0H-125	30.0999			slope	2.4992
CsSAUR71	0H-125	29.9715			1/slope	0.400128
CsSAUR71	0H-125	30.101			R^2	0.9946
CsSAUR71	0H-625	32.0442			E	0.904046
CsSAUR71	0H-625	32.0415
CsSAUR71	0H-625	32.0509				Average
CsSAUR73	0H-5	26.1338		CsSAUR73	5-1	26.2254
CsSAUR73	0H-5	26.4275			5-2	28.7514
CsSAUR73	0H-5	26.1151			5-3	31.4263
CsSAUR73	0H-25	28.7978			5-4	33.5321
CsSAUR73	0H-25	28.7639
CsSAUR73	0H-25	28.6924
CsSAUR73	0H-125	31.2386			slope	2.4595
CsSAUR73	0H-125	31.8053			1/slope	0.406587
CsSAUR73	0H-125	31.2349			R^2	0.9977
CsSAUR73	0H-625	33.5954			E	0.923942
CsSAUR73	0H-625	33.5751
CsSAUR73	0H-625	33.4258				Average
CsSAUR82	0H-5	25.9097		CsSAUR82	5-1	25.8019
CsSAUR82	0H-5	25.7016			5-2	28.0271
CsSAUR82	0H-5	25.7945			5-3	31.0374
CsSAUR82	0H-25	28.1352			5-4	33.0726
CsSAUR82	0H-25	28.0197
CsSAUR82	0H-25	27.9266
CsSAUR82	0H-125	31.0579			slope	2.4822
CsSAUR82	0H-125	31.0023			1/slope	0.402868
CsSAUR82	0H-125	31.0518			R^2	0.9947
CsSAUR82	0H-625	33.0892			E	0.912463
CsSAUR82	0H-625	33.0668
CsSAUR82	0H-625	33.0619
