# Supplementary material for: Genome-wide identification of SMALL AUXIN UP RNA (SAUR) gene family and its expression profiles in response to abiotic stress and auxin in tea plants ( Camellia sinensis )
Source: PeerJ journal article supplement (doi:10.7717/peerj.20681), 2026-01-30
Supplement: Table_S1.xlsx [file Table_S1.xlsx]

## Sheet: Sheet1
Table S1. Sequences of quantiative RT-PCR primers
Reference genes	Primers	5'-3'
Csβ-actin	Forward	GCCATCTTTGATTGGAATGG
	Reverse	GGTGCCACAACCTTGATCTT
CsGAPDH	Forward	TTGGCATCGTTGAGGGTCT
	Reverse	CAGTGGGAACACGGAAAGC
CsSAUR7	Forward	GTAGGAGGTTCGTAGTTCGCG
	Reverse	GAGTTACAGGACTCGGATCGG
CsSAUR10	Forward	GGGCATTTTGCAGTCTACGTG
	Reverse	CAACCCATCTCTCTGCTCGAA
CsSAUR12	Forward	GATCCGAATCGAAGACGCCA
	Reverse	AGCTTGATGAAGATCGGGTGG
CsSAUR16	Forward	GCTTTAATCTCCACCGTCCTC
	Reverse	ATTGCATGAACAGTGGGTGAT
CsSAUR42	Forward	ACGACGACAACAGTGTCACC
	Reverse	AGCCAAACTCTTCTTCGGCA
CsSAUR71	Forward	GTCAGCGCAGAGCTCCTAAA
	Reverse	AACTGACTCGTCACCGACAC
CsSAUR73	Forward	TTAGCAATCATGGTGGGGCA
	Reverse	TTGGAAGTGGCGAAACTCCT
CsSAUR82	Forward	GAGGACGTGAAAGAAGGGCA
	Reverse	GCTGCTAGCTCCAACAACCT
