# Supplementary material for: Genome-wide identification of SMALL AUXIN UP RNA (SAUR) gene family and its expression profiles in response to abiotic stress and auxin in tea plants ( Camellia sinensis )
Source: PeerJ journal article supplement (doi:10.7717/peerj.20681), 2026-01-30
Supplement: Table_S2.xlsx [file Table_S2.xlsx]

## Sheet: Sheet1
Table S2.Characteristics of SAUR gene family in C. sinensis.
Gene Name		Gene ID	AA	MW(kDa)	pI	Aliphatic Index	Instability Index	Grand Average of Hydropathicity	CELLO localization
CsSAUR1	CSS0030699.1		118	13973	6.91	84.24	34.57	-0.645	Cyto(7.0)
CsSAUR2	CSS0046137.1		67	7997.68	10.09	81.34	35.94	-0.803	Cyto(4.0)
CsSAUR3	CSS0023839.1		106	12125.9	7.83	80.94	57.68	-0.475	Mito(6.5)
CsSAUR4	CSS0008211.1		111	12643.5	8.6	77.3	47.28	-0.44	Nucl(8.5)
CsSAUR5	CSS0018638.1		173	19643.2	5.97	74.34	58.19	-0.605	Cyto( 7.0)
CsSAUR6	CSS0004454.1		106	12055.9	8.52	85.47	59.58	-0.327	Mito(9.5)
CsSAUR7	CSS0012504.1		150	16997.7	9.66	89.67	74.89	-0.243	Mito(8.5)
CsSAUR8	CSS0028750.1		169	19633	10.71	68.58	46.02	-0.572	Chlo(5.0)
CsSAUR9	CSS0030334.1		118	14198	6.19	63.47	50.11	-0.899	Cyto(7.0)
CsSAUR10	CSS0035781.1		92	10271.9	8.77	81.52	54.21	0.076	Chlo(9.0)
CsSAUR11	CSS0002448.1		97	11134.1	8.46	77.32	45.74	-0.243	Cyto(10.0)
CsSAUR12	CSS0016597.1		135	15172.5	9.34	99.56	57.96	-0.098	Mito(7.0)
CsSAUR13	CSS0023406.1		148	16792.5	8.93	102.77	41.68	-0.057	Chlo(6.0)
CsSAUR14	CSS0002906.1		137	15311.7	6.72	99.64	32.29	-0.008	Nucl(6.0)
CsSAUR15	CSS0015549.1		137	15311.7	6.72	99.64	32.29	-0.008	Nucl(6.0)
CsSAUR16	CSS0047292.1		107	12548.4	7.85	64.58	37.33	-0.681	Chlo(4.0)
CsSAUR17	CSS0019778.1		100	11252.2	7.98	107.1	62.81	0.124	Chlo(7.0)
CsSAUR18	CSS0004553.1		101	11226.9	6.64	103.17	56.81	-0.038	Chlo(7.0)
CsSAUR19	CSS0035933.1		100	11171	6.57	109.1	51.29	0.058	Chlo(8.0)
CsSAUR20	CSS0012602.1		104	11661.4	8.79	87.12	54.19	-0.217	Mito( 9.5)
CsSAUR21	CSS0006086.1		105	11855.7	8.77	88.19	40.75	-0.229	Mito(11.0)
CsSAUR22	CSS0033994.1		100	11143.8	7.01	96.5	33.29	0.004	Mito(10.0)
CsSAUR23	CSS0013747.1		101	11109.8	6.9	93.66	49.06	-0.058	Mito(10.0)
CsSAUR24	CSS0002210.1		80	9234.83	8.88	88.88	55.97	-0.216	Chlo( 7.0)
CsSAUR25	CSS0000800.1		101	11264	8.93	86.93	63.03	-0.189	Mito(12.0)
CsSAUR26	CSS0049538.1		67	7656.76	5.13	74.18	48.41	-0.157	Cyto(6.0)
CsSAUR27	CSS0026510.1		95	10657.2	6.07	82.11	51.15	-0.296	Mito( 8.0)
CsSAUR28	CSS0023368.1		103	11334.1	8.64	89.03	59.64	-0.102	Mito( 6.0)
CsSAUR29	CSS0010104.1		102	11332	6.26	93.73	58.55	-0.097	Nucl( 6.5)
CsSAUR30	CSS0023158.1		95	10503	6.06	85.26	56.5	-0.082	Mito( 11.0)
CsSAUR31	CSS0030522.1		101	11236.9	7.95	86.93	53.98	-0.253	Mito( 9.0)
CsSAUR32	CSS0043473.1		101	11180.8	6.4	86.93	46.67	-0.234	Nucl( 6.5)
CsSAUR33	CSS0040578.1		102	11535.2	6.4	89.9	60.76	-0.162	Nucl( 7.5)
CsSAUR34	CSS0028728.1		102	11523.3	6.4	90.88	50.27	-0.154	Mito(9.0)
CsSAUR35	CSS0007415.1		67	7729.9	6.04	78.51	54.99	-0.258	Chlo(4.0)
CsSAUR36	CSS0006588.1		103	11242.8	6.26	85.24	56.89	-0.066	Mito(10.0)
CsSAUR37	CSS0029989.1		95	10516	6.72	84.21	62.58	-0.184	Nucl( 6.5)
CsSAUR38	CSS0044939.1		101	11271.8	6.9	79.21	56.72	-0.383	Mito(8.0)
CsSAUR39	CSS0035953.1		102	11420.1	6.39	89.9	59.19	-0.143	Nucl(7.5)
CsSAUR40	CSS0010653.1		102	11428.2	6.82	92.84	48.66	-0.097	Mito(11.0)
CsSAUR41	CSS0033227.1		69	7980.19	5.7	72.03	57.99	-0.219	Cyto(8.0)
CsSAUR42	CSS0040677.1		108	12362.4	7.71	89.26	58.16	-0.211	Mito(7.5)
CsSAUR43	CSS0043205.1		108	12362.4	7.71	89.26	58.16	-0.211	Mito(7.5)
CsSAUR44	CSS0003919.1		151	16658	8.95	85.83	59.69	-0.277	Chlo( 8.0)
CsSAUR45	CSS0044119.1		69	7980.19	5.7	72.03	57.99	-0.219	Cyto(8.0)
CsSAUR46	CSS0045189.1		102	11431.3	7.89	92.84	48.19	-0.07	Mito(8.0)
CsSAUR47	CSS0045411.1		102	11367	6.26	89.9	56.95	-0.1	Nucl(7.5)
CsSAUR48	CSS0047162.1		101	11313	7.84	85.94	47.39	-0.341	Nucl(7.5)
CsSAUR49	CSS0031693.1		95	10458	7.92	84.21	61.85	-0.152	Nucl(6.5)
CsSAUR50	CSS0035350.1		103	11226.8	5.84	84.27	63.02	-0.081	Chlo(5.0)
CsSAUR51	CSS0016944.1		67	7779.91	5.17	78.51	56.73	-0.219	Cyto(4.0)
CsSAUR52	CSS0035196.1		102	11477.2	6.17	91.86	48.99	-0.112	Mito(10.0)
CsSAUR53	CSS0024467.1		102	11337	5.42	93.73	55.74	-0.031	Nucl(7.5)
CsSAUR54	CSS0038463.1		101	11236.9	7.95	86.93	53.98	-0.253	Mito( 9.0)
CsSAUR55	CSS0045796.1		101	11208.9	7.95	84.95	51.91	-0.252	Mito( 10.0)
CsSAUR56	CSS0040593.1		95	10484	5.84	85.26	61.92	-0.068	Mito( 10.0)
CsSAUR57	CSS0031673.1		103	11334	7.79	89.03	62.33	-0.098	Mito(6.0)
CsSAUR58	CSS0012779.1		101	11280.7	5.89	82.08	52.67	-0.281	Nucl( 9.5)
CsSAUR59	CSS0030565.1		95	10600.1	6.07	83.16	55.2	-0.241	Nucl( 5.50
CsSAUR60	CSS0005218.1		102	11439.2	9.46	90.88	63.69	-0.245	Mito(5.0)
CsSAUR61	CSS0049156.1		67	7700.82	5.45	72.69	49.75	-0.21	Chlo( 5.0)
CsSAUR62	CSS0011227.1		101	11273	8.93	86.93	63.78	-0.186	Mito(13.0)
CsSAUR63	CSS0014035.1		80	9234.83	8.88	88.88	55.97	-0.216	Chlo(7.0)
CsSAUR64	CSS0032455.1		100	11157.8	7.01	96.5	31.36	0.005	Mito(10.0)
CsSAUR65	CSS0021275.1		105	11855.7	8.77	88.19	40.75	-0.229	Mito(11.0)
CsSAUR66	CSS0029652.1		104	11661.4	8.79	87.12	54.19	-0.217	Mito(9.5)
CsSAUR67	CSS0001989.1		100	11172.9	6.57	107.1	54.6	0.029	Chlo(7.0)
CsSAUR68	CSS0044533.1		94	10515.1	6.64	100.43	55.52	-0.056	Chlo(5.0)
CsSAUR69	CSS0038136.1		101	11303	9.03	100.2	66.73	-0.094	Chlo(8.0)
CsSAUR70	CSS0047497.1		133	15321.6	9.23	90.08	57.56	-0.359	Mito(8.5)
CsSAUR71	CSS0015721.1		133	15321.6	9.23	90.08	57.56	-0.359	Mito(8.5)
CsSAUR72	CSS0001227.1		134	15343.3	6.51	88.73	68.7	-0.578	Mito(8.5)
CsSAUR73	CSS0024285.1		123	14579.6	6.31	77.56	32.74	-0.635	Nucl(3.0)
CsSAUR74	CSS0004746.1		71	7970.06	4.3	98.87	57.38	-0.006	Chlo(7.0)
CsSAUR75	CSS0048307.1		141	16398	9.27	78.79	68.49	-0.282	Mito(8.5)
CsSAUR76	CSS0037855.1		144	16273	7.02	99.51	43.81	-0.253	Chlo(10.5)
CsSAUR77	CSS0042595.1		108	12028.1	5.39	94.81	59.67	0.049	Cyto(5.0)
CsSAUR78	CSS0043296.1		114	12653	5.39	106.93	54.57	0.23	Cyto(5.0)
CsSAUR79	CSS0011505.1		144	16216.8	7.02	96.81	45.67	-0.303	Chlo(10.5)
CsSAUR80	CSS0000549.1		131	15122	9.16	89.31	50.03	-0.094	Chlo(9.0)
CsSAUR81	CSS0009432.1		148	17115.8	9.35	97.5	40.63	-0.209	Mito(7.5)
CsSAUR82	CSS0036444.1		134	15155.7	8.41	92.39	27.25	-0.396	Nucl(7.0)
CsSAUR83	CSS0007979.1		160	18340.2	10.1	70.06	31.29	-0.632	Mito(7.5)
CsSAUR84	CSS0047069.1		89	9792.38	7.87	105.17	45.02	-0.267	Nucl(10.0)
CsSAUR85	CSS0032131.1		118	13151.2	5.92	107.46	53.03	-0.253	Nucl(8.0)
CsSAUR86	CSS0042117.1		160	17828.6	9.77	84.06	33.94	-0.372	Chlo(6.0)
CsSAUR87	CSS0031836.1		140	15792.1	5.73	79.36	53.27	-0.43	Mito(8.5)
CsSAUR88	CSS0043539.1		200	22723	8.75	75.05	40.93	-0.549	Nucl(7.0)
CsSAUR89	CSS0017690.1		118	12864.7	5.85	99.92	19.09	0.097	Chlo(6.0)
CsSAUR90	CSS0034956.1		118	12864.7	5.85	99.92	19.09	0.097	Chlo(6.0)
CsSAUR91	CSS0010550.1		148	17115.8	9.35	96.82	40.04	-0.177	Mito(8.0)
CsSAUR92	CSS0024575.1		146	17019.6	9.54	83.42	62.52	-0.344	Mito(9.5)
CsSAUR93	CSS0045769.1		105	12020.9	7.8	81.52	60.09	-0.332	Mito(5.5)
CsSAUR94	CSS0012756.1		136	15511.7	9.57	112.65	17.78	0.257	Chlo(4.0)
CsSAUR95	CSS0021458.1		128	14693.3	10.08	92.89	48.26	-0.113	Chlo(11.0)
CsSAUR96	CSS0019390.1		169	19559.9	10.71	70.89	44.61	-0.544	Mito(4.5)
CsSAUR97	CSS0034397.1		160	18297.2	10.21	68.25	30.7	-0.663	Mito(9.5)
