# Supplementary material for: Genome-wide identification of SMALL AUXIN UP RNA (SAUR) gene family and its expression profiles in response to abiotic stress and auxin in tea plants ( Camellia sinensis )
Source: PeerJ journal article supplement (doi:10.7717/peerj.20681), 2026-01-30
Supplement: Table_S3.xlsx [file Table_S3.xlsx]

## Sheet: Sheet1
Table S3. Fragment repeat gene pairs of C. sinensis.
CsSAUR1-CsSAUR9	CsSAUR24-CsSAUR61
CsSAUR1-CsSAUR16	CsSAUR27-CsSAUR49
CsSAUR1-CsSAUR73	CsSAUR29-CsSAUR46
CsSAUR3-CsSAUR4	CsSAUR32-CsSAUR48
CsSAUR3-CsSAUR6	CsSAUR32-CsSAUR54
CsSAUR4-CsSAUR6	CsSAUR33-CsSAUR47
CsSAUR6-CsSAUR25	CsSAUR33-CsSAUR53
CsSAUR7-CsSAUR44	CsSAUR34-CsSAUR52
CsSAUR7-CsSAUR75	CsSAUR35-CsSAUR45
CsSAUR8-CsSAUR83	CsSAUR35-CsSAUR51
CsSAUR8-CsSAUR86	CsSAUR37-CsSAUR49
CsSAUR9-CsSAUR16	CsSAUR38-CsSAUR48
CsSAUR9-CsSAUR73	CsSAUR38-CsSAUR54
CsSAUR11-CsSAUR80	CsSAUR39-CsSAUR47
CsSAUR12-CsSAUR70	CsSAUR41-CsSAUR45
CsSAUR16-CsSAUR73	CsSAUR44-CsSAUR62
CsSAUR17-CsSAUR54	CsSAUR61-CsSAUR45
CsSAUR17-CsSAUR67	CsSAUR61-CsSAUR51
CsSAUR19-CsSAUR53	CsSAUR62-CsSAUR7
CsSAUR20-CsSAUR62	CsSAUR67-CsSAUR54
CsSAUR24-CsSAUR45	CsSAUR75-CsSAUR92
CsSAUR24-CsSAUR51	CsSAUR82-CsSAUR84
