# Supplementary material for: Genome-wide identification of SMALL AUXIN UP RNA (SAUR) gene family and its expression profiles in response to abiotic stress and auxin in tea plants ( Camellia sinensis )
Source: PeerJ journal article supplement (doi:10.7717/peerj.20681), 2026-01-30
Supplement: Table_S4.xlsx [file Table_S4.xlsx]

## Sheet: Sheet1
Table S4. Homologous gene pairs of C. sinensis and A. thaliana.
CsSAUR1-AtSAUR30	CsSAUR38-AtSAUR3
CsSAUR3-AtSAUR9	CsSAUR39-AtSAUR6
CsSAUR3-AtSAUR10	CsSAUR40-AtSAUR1
CsSAUR3-AtSAUR11	CsSAUR42-AtSAUR12
CsSAUR3-AtSAUR16	CsSAUR42-AtSAUR16
CsSAUR4-AtSAUR9	CsSAUR54-AtSAUR14
CsSAUR4-AtSAUR10	CsSAUR54-AtSAUR15
CsSAUR4-AtSAUR11	CsSAUR56-AtSAUR13
CsSAUR4-AtSAUR51	CsSAUR59-AtSAUR50
CsSAUR4-AtSAUR54	CsSAUR62-AtSAUR1
CsSAUR5-AtSAUR39	CsSAUR67-AtSAUR3
CsSAUR5-AtSAUR70	CsSAUR70-AtSAUR71
CsSAUR6-AtSAUR8	CsSAUR70-AtSAUR72
CsSAUR6-AtSAUR12	CsSAUR71-AtSAUR40
CsSAUR6-AtSAUR16	CsSAUR71-AtSAUR41
CsSAUR8-AtSAUR36	CsSAUR72-AtSAUR74
CsSAUR8-AtSAUR59	CsSAUR73-AtSAUR30
CsSAUR9-AtSAUR31	CsSAUR73-AtSAUR32
CsSAUR9-AtSAUR32	CsSAUR75-AtSAUR52
CsSAUR11-AtSAUR57	CsSAUR75-AtSAUR53
CsSAUR12-AtSAUR32	CsSAUR80-AtSAUR44
CsSAUR12-AtSAUR41	CsSAUR80-AtSAUR46
CsSAUR12-AtSAUR72	CsSAUR82-AtSAUR42
CsSAUR16-AtSAUR31	CsSAUR83-AtSAUR34
CsSAUR16-AtSAUR32	CsSAUR83-AtSAUR35
CsSAUR16-AtSAUR33	CsSAUR85-AtSAUR42
CsSAUR25-AtSAUR7	CsSAUR86-AtSAUR34
CsSAUR25-AtSAUR13	CsSAUR86-AtSAUR35
CsSAUR27-AtSAUR14	CsSAUR87-AtSAUR47
CsSAUR29-AtSAUR15	CsSAUR90-AtSAUR77
CsSAUR33-AtSAUR5	CsSAUR92-AtSAUR52
CsSAUR37-AtSAUR4
