# Supplementary material for: Genome-wide identification of SMALL AUXIN UP RNA (SAUR) gene family and its expression profiles in response to abiotic stress and auxin in tea plants ( Camellia sinensis )
Source: PeerJ journal article supplement (doi:10.7717/peerj.20681), 2026-01-30
Supplement: Table_S5.xlsx [file Table_S5.xlsx]

## Sheet: Sheet1
Table S5. Ka/Ks analysis of gene pairs in C. sinensis.
S.no	Paralogous Pairs	Ka	Ks	Ka/Ks	Duplication
1	CsSAUR3-CsSAUR4	0.09	0.57	0.16	SD
2	CsSAUR3-CsSAUR6	0.15	0.9	0.16	SD
3	CsSAUR3-CsSAUR73	0.11	0.69	0.15	SD
4	CsSAUR80-CsSAUR11	0.24	0.42	0.56	SD
5	CsSAUR82-CsSAUR84	0.14	1.04	0.13	SD
6	CsSAUR83-CsSAUR8	0.4	1.35	0.3	SD
7	CsSAUR86-CsSAUR8	0.5	2.15	0.23	SD
8	CsSAUR4-CsSAUR6	0.14	1.68	0.09	SD
9	CsSAUR7-CsSAUR44	0.13	0.51	0.26	SD
10	CsSAUR9-CsSAUR16	0.13	0.93	0.14	SD
11	CsSAUR7-CsSAUR75	0.18	0.77	0.23	SD
12	CsSAUR12-CsSAUR70	0.13	0.65	0.2	SD
13	CsSAUR24-CsSAUR45	0.07	0.24	0.31	SD
14	CsSAUR29-CsSAUR46	0.07	0.26	0.27	SD
15	CsSAUR33-CsSAUR47	0.02	0.01	2.66	SD
16	CsSAUR38-CsSAUR54	0.02	0.02	0.92	SD
17	CsSAUR17-CsSAUR67	0.07	0.35	0.21	SD
18	CsSAUR20-CsSAUR62	0.25	1.14	0.22	SD
19	CsSAUR24-CsSAUR61	0.04	0.22	0.17	SD
20	CsSAUR32-CsSAUR54	0.01	0.01	0.61	SD
21	CsSAUR33-CsSAUR53	0.02	0.01	3.21	SD
22	CsSAUR34-CsSAUR52	0.01	0.03	0.45	SD
23	CsSAUR37-CsSAUR49	0.01	0.04	0.19	SD
24	CsSAUR38-CsSAUR48	0.04	0.04	0.93	SD
25	CsSAUR17-CsSAUR54	0.4	1.24	0.32	SD
26	CsSAUR19-CsSAUR53	0.32	1.1	0.29	SD
27	CsSAUR24-CsSAUR51	0.04	0.29	0.15	SD
28	CsSAUR27-CsSAUR49	0.03	0.08	0.43	SD
29	CsSAUR32-CsSAUR48	0.04	0.04	1.03	SD
30	CsSAUR35-CsSAUR45	0.08	0.19	0.4	SD
31	CsSAUR75-CsSAUR92	0.1	0.47	0.22	SD
32	CsSAUR66-CsSAUR67	0.28	1.22	0.23	TD
33	CsSAUR17-CsSAUR18	0.11	0.29	0.38	TD
34	CsSAUR18-CsSAUR19	0.05	0.25	0.21	TD
35	CsSAUR20-CsSAUR21	0.06	0.26	0.22	TD
36	CsSAUR29-CsSAUR28	0.07	0.18	0.38	TD
37	CsSAUR94-CsSAUR95	0.4	1.05	0.38	TD
38	CsSAUR58-CsSAUR59	0.12	0.39	0.32	TD
39	CsSAUR57-CsSAUR58	0.12	0.34	0.35	TD
40	CsSAUR22-CsSAUR23	0.28	1.29	0.22	TD
41	CsSAUR30-CsSAUR31	0.05	0.18	0.29	TD
42	CsSAUR68-CsSAUR69	0.03	0.17	0.17	TD
