# Supplementary material for: Genome-wide identification of SMALL AUXIN UP RNA (SAUR) gene family and its expression profiles in response to abiotic stress and auxin in tea plants ( Camellia sinensis )
Source: PeerJ journal article supplement (doi:10.7717/peerj.20681), 2026-01-30
Supplement: Table_S6.xlsx [file Table_S6.xlsx]

## Sheet: cs.plantcare
Table S6.Analysis of cis-elements of CsSAUR genes
Gene	ID	Location	Species		Type
CsSAUR80	CSS0000549.1	1351	Nicotiana glutinosa		NA	NA
CsSAUR80	CSS0000549.1	55	Arabidopsis thaliana		NA	NA
CsSAUR80	CSS0000549.1	662	Arabidopsis thaliana		NA	NA
CsSAUR80	CSS0000549.1	781	Arabidopsis thaliana		NA	NA
CsSAUR80	CSS0000549.1	783	Arabidopsis thaliana		NA	NA
CsSAUR80	CSS0000549.1	909	Arabidopsis thaliana		NA	NA
CsSAUR80	CSS0000549.1	1325	Arabidopsis thaliana		NA	NA
CsSAUR80	CSS0000549.1	1327	Arabidopsis thaliana		NA	NA
CsSAUR80	CSS0000549.1	1329	Arabidopsis thaliana		NA	NA
CsSAUR80	CSS0000549.1	1940	Arabidopsis thaliana		NA	NA
CsSAUR80	CSS0000549.1	1287	Hordeum vulgare	cis-acting regulatory element involved in the MeJA-responsiveness	Environment	MeJA
CsSAUR80	CSS0000549.1	1499	Hordeum vulgare	cis-acting regulatory element involved in the MeJA-responsiveness	Environment	MeJA
CsSAUR80	CSS0000549.1	1527	Nicotiana tabacum		NA	NA
CsSAUR80	CSS0000549.1	238	Arabidopsis thaliana		NA	NA
CsSAUR80	CSS0000549.1	283	Petroselinum crispum	part of a conserved DNA module involved in light responsiveness	Environment	Light
CsSAUR80	CSS0000549.1	292	Petroselinum crispum	part of a conserved DNA module involved in light responsiveness	Environment	Light
CsSAUR80	CSS0000549.1	900	Petroselinum crispum	part of a conserved DNA module involved in light responsiveness	Environment	Light
CsSAUR80	CSS0000549.1	1676	Petroselinum crispum	part of a conserved DNA module involved in light responsiveness	Environment	Light
CsSAUR80	CSS0000549.1	1287	Hordeum vulgare	cis-acting regulatory element involved in the MeJA-responsiveness	Environment	MeJA
CsSAUR80	CSS0000549.1	1499	Hordeum vulgare	cis-acting regulatory element involved in the MeJA-responsiveness	Environment	MeJA
CsSAUR80	CSS0000549.1	159	Daucus carota	part of a light responsive element	Environment	Light
CsSAUR80	CSS0000549.1	1287	Arabidopsis thaliana		NA	NA
CsSAUR80	CSS0000549.1	1499	Arabidopsis thaliana		NA	NA
CsSAUR80	CSS0000549.1	175	Solanum tuberosum	part of a light responsive module	Environment	Light
CsSAUR80	CSS0000549.1	1111	Glycine max	binding site of AT-rich DNA binding protein (ATBP-1)	Common	Common
CsSAUR80	CSS0000549.1	1547	Glycine max	binding site of AT-rich DNA binding protein (ATBP-1)	Common	Common
CsSAUR80	CSS0000549.1	710	Pisum sativum		NA	NA
CsSAUR80	CSS0000549.1	1527	Arabidopsis thaliana		NA	NA
CsSAUR80	CSS0000549.1	74	Nicotiana glutinos		NA	NA
CsSAUR80	CSS0000549.1	301	Nicotiana glutinos		NA	NA
CsSAUR80	CSS0000549.1	488	Nicotiana glutinos		NA	NA
CsSAUR80	CSS0000549.1	810	Nicotiana glutinos		NA	NA
CsSAUR80	CSS0000549.1	816	Nicotiana glutinos		NA	NA
CsSAUR80	CSS0000549.1	890	Nicotiana glutinos		NA	NA
CsSAUR80	CSS0000549.1	976	Nicotiana glutinos		NA	NA
CsSAUR80	CSS0000549.1	1090	Nicotiana glutinos		NA	NA
CsSAUR80	CSS0000549.1	1102	Nicotiana glutinos		NA	NA
CsSAUR80	CSS0000549.1	1347	Nicotiana glutinos		NA	NA
CsSAUR80	CSS0000549.1	201	Petroselinum hortense		NA	NA
CsSAUR80	CSS0000549.1	1723	Petroselinum hortense		NA	NA
CsSAUR80	CSS0000549.1	1906	Petroselinum hortense		NA	NA
CsSAUR80	CSS0000549.1	1911	Petroselinum hortense		NA	NA
CsSAUR80	CSS0000549.1	1967	Petroselinum hortense		NA	NA
CsSAUR80	CSS0000549.1	1995	Petroselinum hortense		NA	NA
CsSAUR80	CSS0000549.1	1527	Brassica oleracea	gibberellin-responsive element	Phytohormone	Gibberellin
CsSAUR80	CSS0000549.1	554	Oryza sativa	cis-regulatory element involved in endosperm expression	Tissue	Endosperm
CsSAUR80	CSS0000549.1	1613	Oryza sativa	cis-regulatory element involved in endosperm expression	Tissue	Endosperm
CsSAUR80	CSS0000549.1	1705	Nicotiana tabacum	cis-acting element involved in defense and stress responsiveness	Environment	Mixed stress
CsSAUR80	CSS0000549.1	378	Zea mays	cis-acting regulatory element essential for the anaerobic induction	Environment	Anaerobic
CsSAUR80	CSS0000549.1	1115	Zea mays	cis-acting regulatory element essential for the anaerobic induction	Environment	Anaerobic
CsSAUR80	CSS0000549.1	498	Arabidopsis thaliana	part of a light responsive element	Environment	Light
CsSAUR80	CSS0000549.1	199	organism	short_function	Common	Common
CsSAUR80	CSS0000549.1	348	organism	short_function	Common	Common
CsSAUR80	CSS0000549.1	452	organism	short_function	Common	Common
CsSAUR80	CSS0000549.1	1166	organism	short_function	Common	Common
CsSAUR80	CSS0000549.1	1723	organism	short_function	Common	Common
CsSAUR80	CSS0000549.1	1887	organism	short_function	Common	Common
CsSAUR80	CSS0000549.1	1993	organism	short_function	Common	Common
CsSAUR80	CSS0000549.1	476	Oryza sativa	cis-acting element involved in gibberellin-responsiveness	Phytohormone	gibberellin
CsSAUR80	CSS0000549.1	433	Arabidopsis thaliana		NA	NA
CsSAUR80	CSS0000549.1	1216	Arabidopsis thaliana		NA	NA
CsSAUR80	CSS0000549.1	1264	Arabidopsis thaliana		NA	NA
CsSAUR80	CSS0000549.1	28	Nicotiana glutinosa		NA	NA
CsSAUR80	CSS0000549.1	39	Nicotiana glutinosa		NA	NA
CsSAUR80	CSS0000549.1	60	Nicotiana glutinosa		NA	NA
CsSAUR80	CSS0000549.1	84	Nicotiana glutinosa		NA	NA
CsSAUR80	CSS0000549.1	186	Arabidopsis thaliana	common cis-acting element in promoter and enhancer regions	Common	Common
CsSAUR80	CSS0000549.1	206	Nicotiana glutinosa		NA	NA
CsSAUR80	CSS0000549.1	232	Pisum sativum	common cis-acting element in promoter and enhancer regions	Common	Common
CsSAUR80	CSS0000549.1	252	Nicotiana glutinosa		NA	NA
CsSAUR80	CSS0000549.1	400	Nicotiana glutinosa		NA	NA
CsSAUR80	CSS0000549.1	416	Nicotiana glutinosa		NA	NA
CsSAUR80	CSS0000549.1	433	Nicotiana glutinosa		NA	NA
CsSAUR80	CSS0000549.1	435	Nicotiana glutinosa		NA	NA
CsSAUR80	CSS0000549.1	439	Nicotiana glutinosa		NA	NA
CsSAUR80	CSS0000549.1	572	Pisum sativum	common cis-acting element in promoter and enhancer regions	Common	Common
CsSAUR80	CSS0000549.1	608	Nicotiana glutinosa		NA	NA
CsSAUR80	CSS0000549.1	692	Nicotiana glutinosa		NA	NA
CsSAUR80	CSS0000549.1	986	Pisum sativum	common cis-acting element in promoter and enhancer regions	Common	Common
CsSAUR80	CSS0000549.1	1142	Arabidopsis thaliana	common cis-acting element in promoter and enhancer regions	Common	Common
CsSAUR80	CSS0000549.1	1148	Nicotiana glutinosa		NA	NA
CsSAUR80	CSS0000549.1	1164	Nicotiana glutinosa		NA	NA
CsSAUR80	CSS0000549.1	1172	Pisum sativum	common cis-acting element in promoter and enhancer regions	Common	Common
CsSAUR80	CSS0000549.1	1265	Pisum sativum	common cis-acting element in promoter and enhancer regions	Common	Common
CsSAUR80	CSS0000549.1	1314	Pisum sativum	common cis-acting element in promoter and enhancer regions	Common	Common
CsSAUR80	CSS0000549.1	1423	Arabidopsis thaliana	common cis-acting element in promoter and enhancer regions	Common	Common
CsSAUR80	CSS0000549.1	1444	Nicotiana glutinosa		NA	NA
CsSAUR80	CSS0000549.1	1458	Nicotiana glutinosa		NA	NA
CsSAUR80	CSS0000549.1	1485	Arabidopsis thaliana	common cis-acting element in promoter and enhancer regions	Common	Common
CsSAUR80	CSS0000549.1	1564	Pisum sativum	common cis-acting element in promoter and enhancer regions	Common	Common
CsSAUR80	CSS0000549.1	1567	Nicotiana glutinosa		NA	NA
CsSAUR80	CSS0000549.1	1571	Nicotiana glutinosa		NA	NA
CsSAUR80	CSS0000549.1	1611	Nicotiana glutinosa		NA	NA
CsSAUR80	CSS0000549.1	1636	Nicotiana glutinosa		NA	NA
CsSAUR80	CSS0000549.1	1654	Arabidopsis thaliana	common cis-acting element in promoter and enhancer regions	Common	Common
CsSAUR80	CSS0000549.1	1660	Nicotiana glutinosa		NA	NA
CsSAUR80	CSS0000549.1	1672	Nicotiana glutinosa		NA	NA
CsSAUR80	CSS0000549.1	1718	Nicotiana glutinosa		NA	NA
CsSAUR80	CSS0000549.1	1768	Nicotiana glutinosa		NA	NA
CsSAUR80	CSS0000549.1	1807	Nicotiana glutinosa		NA	NA
CsSAUR80	CSS0000549.1	23	Arabidopsis thaliana	core promoter element around -30 of transcription start	Common	Common
CsSAUR80	CSS0000549.1	53	Brassica napus	core promoter element around -30 of transcription start	Common	Common
CsSAUR80	CSS0000549.1	54	Arabidopsis thaliana	core promoter element around -30 of transcription start	Common	Common
CsSAUR80	CSS0000549.1	55	Arabidopsis thaliana	core promoter element around -30 of transcription start	Common	Common
CsSAUR80	CSS0000549.1	56	Brassica napus	core promoter element around -30 of transcription start	Common	Common
CsSAUR80	CSS0000549.1	57	Arabidopsis thaliana	core promoter element around -30 of transcription start	Common	Common
CsSAUR80	CSS0000549.1	239	Pisum sativum	core promoter element around -30 of transcription start	Common	Common
CsSAUR80	CSS0000549.1	240	Helianthus annuus	core promoter element around -30 of transcription start	Common	Common
CsSAUR80	CSS0000549.1	241	Arabidopsis thaliana	core promoter element around -30 of transcription start	Common	Common
CsSAUR80	CSS0000549.1	242	Arabidopsis thaliana	core promoter element around -30 of transcription start	Common	Common
CsSAUR80	CSS0000549.1	246	Brassica oleracea	core promoter element around -30 of transcription start	Common	Common
CsSAUR80	CSS0000549.1	247	Arabidopsis thaliana	core promoter element around -30 of transcription start	Common	Common
CsSAUR80	CSS0000549.1	257	Brassica juncea	core promoter element around -30 of transcription start	Common	Common
CsSAUR80	CSS0000549.1	258	Helianthus annuus	core promoter element around -30 of transcription start	Common	Common
CsSAUR80	CSS0000549.1	259	Arabidopsis thaliana	core promoter element around -30 of transcription start	Common	Common
CsSAUR80	CSS0000549.1	260	Arabidopsis thaliana	core promoter element around -30 of transcription start	Common	Common
CsSAUR80	CSS0000549.1	299	Arabidopsis thaliana	core promoter element around -30 of transcription start	Common	Common
CsSAUR80	CSS0000549.1	423	Arabidopsis thaliana	core promoter element around -30 of transcription start	Common	Common
CsSAUR80	CSS0000549.1	441	Brassica napus	core promoter element around -30 of transcription start	Common	Common
CsSAUR80	CSS0000549.1	442	Arabidopsis thaliana	core promoter element around -30 of transcription start	Common	Common
CsSAUR80	CSS0000549.1	443	Arabidopsis thaliana	core promoter element around -30 of transcription start	Common	Common
CsSAUR80	CSS0000549.1	662	Arabidopsis thaliana	core promoter element around -30 of transcription start	Common	Common
CsSAUR80	CSS0000549.1	664	Arabidopsis thaliana	core promoter element around -30 of transcription start	Common	Common
CsSAUR80	CSS0000549.1	699	Brassica oleracea	core promoter element around -30 of transcription start	Common	Common
CsSAUR80	CSS0000549.1	700	Arabidopsis thaliana	core promoter element around -30 of transcription start	Common	Common
CsSAUR80	CSS0000549.1	780	Pisum sativum	core promoter element around -30 of transcription start	Common	Common
CsSAUR80	CSS0000549.1	781	Helianthus annuus	core promoter element around -30 of transcription start	Common	Common
CsSAUR80	CSS0000549.1	782	Arabidopsis thaliana	core promoter element around -30 of transcription start	Common	Common
CsSAUR80	CSS0000549.1	783	Arabidopsis thaliana	core promoter element around -30 of transcription start	Common	Common
CsSAUR80	CSS0000549.1	784	Brassica napus	core promoter element around -30 of transcription start	Common	Common
CsSAUR80	CSS0000549.1	785	Avena sativa	core promoter element around -30 of transcription start	Common	Common
CsSAUR80	CSS0000549.1	818	Arabidopsis thaliana	core promoter element around -30 of transcription start	Common	Common
CsSAUR80	CSS0000549.1	844	Arabidopsis thaliana	core promoter element around -30 of transcription start	Common	Common
CsSAUR80	CSS0000549.1	877	Arabidopsis thaliana	core promoter element around -30 of transcription start	Common	Common
CsSAUR80	CSS0000549.1	886	Brassica napus	core promoter element around -30 of transcription start	Common	Common
CsSAUR80	CSS0000549.1	887	Arabidopsis thaliana	core promoter element around -30 of transcription start	Common	Common
CsSAUR80	CSS0000549.1	908	Brassica napus	core promoter element around -30 of transcription start	Common	Common
CsSAUR80	CSS0000549.1	909	Arabidopsis thaliana	core promoter element around -30 of transcription start	Common	Common
CsSAUR80	CSS0000549.1	910	Brassica oleracea	core promoter element around -30 of transcription start	Common	Common
CsSAUR80	CSS0000549.1	911	Arabidopsis thaliana	core promoter element around -30 of transcription start	Common	Common
CsSAUR80	CSS0000549.1	919	Oryza sativa	core promoter element around -30 of transcription start	Common	Common
CsSAUR80	CSS0000549.1	939	Pisum sativum	core promoter element around -30 of transcription start	Common	Common
CsSAUR80	CSS0000549.1	940	Helianthus annuus	core promoter element around -30 of transcription start	Common	Common
CsSAUR80	CSS0000549.1	941	Arabidopsis thaliana	core promoter element around -30 of transcription start	Common	Common
CsSAUR80	CSS0000549.1	942	Arabidopsis thaliana	core promoter element around -30 of transcription start	Common	Common
CsSAUR80	CSS0000549.1	949	Pisum sativum	core promoter element around -30 of transcription start	Common	Common
CsSAUR80	CSS0000549.1	950	Helianthus annuus	core promoter element around -30 of transcription start	Common	Common
CsSAUR80	CSS0000549.1	951	Arabidopsis thaliana	core promoter element around -30 of transcription start	Common	Common
CsSAUR80	CSS0000549.1	952	Arabidopsis thaliana	core promoter element around -30 of transcription start	Common	Common
CsSAUR80	CSS0000549.1	958	Pisum sativum	core promoter element around -30 of transcription start	Common	Common
CsSAUR80	CSS0000549.1	959	Helianthus annuus	core promoter element around -30 of transcription start	Common	Common
CsSAUR80	CSS0000549.1	960	Arabidopsis thaliana	core promoter element around -30 of transcription start	Common	Common
CsSAUR80	CSS0000549.1	961	Arabidopsis thaliana	core promoter element around -30 of transcription start	Common	Common
CsSAUR80	CSS0000549.1	991	Brassica napus	core promoter element around -30 of transcription start	Common	Common
CsSAUR80	CSS0000549.1	992	Arabidopsis thaliana	core promoter element around -30 of transcription start	Common	Common
CsSAUR80	CSS0000549.1	993	Arabidopsis thaliana	core promoter element around -30 of transcription start	Common	Common
CsSAUR80	CSS0000549.1	1188	Oryza sativa	core promoter element around -30 of transcription start	Common	Common
CsSAUR80	CSS0000549.1	1277	Brassica napus	core promoter element around -30 of transcription start	Common	Common
CsSAUR80	CSS0000549.1	1278	Arabidopsis thaliana	core promoter element around -30 of transcription start	Common	Common
CsSAUR80	CSS0000549.1	1324	Lycopersicon esculentum	core promoter element around -30 of transcription start	Common	Common
CsSAUR80	CSS0000549.1	1325	Helianthus annuus	core promoter element around -30 of transcription start	Common	Common
CsSAUR80	CSS0000549.1	1326	Arabidopsis thaliana	core promoter element around -30 of transcription start	Common	Common
CsSAUR80	CSS0000549.1	1327	Arabidopsis thaliana	core promoter element around -30 of transcription start	Common	Common
CsSAUR80	CSS0000549.1	1328	Brassica napus	core promoter element around -30 of transcription start	Common	Common
CsSAUR80	CSS0000549.1	1329	Arabidopsis thaliana	core promoter element around -30 of transcription start	Common	Common
CsSAUR80	CSS0000549.1	1331	Arabidopsis thaliana	core promoter element around -30 of transcription start	Common	Common
CsSAUR80	CSS0000549.1	1379	Brassica napus	core promoter element around -30 of transcription start	Common	Common
CsSAUR80	CSS0000549.1	1380	Arabidopsis thaliana	core promoter element around -30 of transcription start	Common	Common
CsSAUR80	CSS0000549.1	1381	Arabidopsis thaliana	core promoter element around -30 of transcription start	Common	Common
CsSAUR80	CSS0000549.1	1453	Arabidopsis thaliana	core promoter element around -30 of transcription start	Common	Common
CsSAUR80	CSS0000549.1	1544	Brassica napus	core promoter element around -30 of transcription start	Common	Common
CsSAUR80	CSS0000549.1	1545	Arabidopsis thaliana	core promoter element around -30 of transcription start	Common	Common
CsSAUR80	CSS0000549.1	1546	Arabidopsis thaliana	core promoter element around -30 of transcription start	Common	Common
CsSAUR80	CSS0000549.1	1641	Arabidopsis thaliana	core promoter element around -30 of transcription start	Common	Common
CsSAUR80	CSS0000549.1	1939	Brassica napus	core promoter element around -30 of transcription start	Common	Common
CsSAUR80	CSS0000549.1	1940	Arabidopsis thaliana	core promoter element around -30 of transcription start	Common	Common
CsSAUR80	CSS0000549.1	1942	Arabidopsis thaliana	core promoter element around -30 of transcription start	Common	Common
CsSAUR80	CSS0000549.1	469	Arabidopsis thaliana	part of a module for light response	Environment	Light
CsSAUR80	CSS0000549.1	1242	Pisum sativum	element for maximal elicitor-mediated activation (2copies)	Environment	Elicitor
CsSAUR25	CSS0000800.1	260	Arabidopsis thaliana		NA	NA
CsSAUR25	CSS0000800.1	262	Arabidopsis thaliana		NA	NA
CsSAUR25	CSS0000800.1	264	Arabidopsis thaliana		NA	NA
CsSAUR25	CSS0000800.1	844	Arabidopsis thaliana		NA	NA
CsSAUR25	CSS0000800.1	895	Arabidopsis thaliana		NA	NA
CsSAUR25	CSS0000800.1	1867	Arabidopsis thaliana		NA	NA
CsSAUR25	CSS0000800.1	1869	Arabidopsis thaliana		NA	NA
CsSAUR25	CSS0000800.1	612	Arabidopsis thaliana	part of a light responsive element	Environment	Light
CsSAUR25	CSS0000800.1	365	Arabidopsis thaliana		NA	NA
CsSAUR25	CSS0000800.1	101	Pisum sativum	part of a light responsive element	Environment	Light
CsSAUR25	CSS0000800.1	793	Hordeum vulgare	cis-acting regulatory element involved in the MeJA-responsiveness	Environment	MeJA
CsSAUR25	CSS0000800.1	1042	Petroselinum crispum	part of a conserved DNA module involved in light responsiveness	Environment	Light
CsSAUR25	CSS0000800.1	402	Nicotiana tabacum		NA	NA
CsSAUR25	CSS0000800.1	1129	Nicotiana tabacum		NA	NA
CsSAUR25	CSS0000800.1	1514	Nicotiana tabacum		NA	NA
CsSAUR25	CSS0000800.1	1606	Nicotiana tabacum		NA	NA
CsSAUR25	CSS0000800.1	597	Avena sativa		NA	NA
CsSAUR25	CSS0000800.1	793	Hordeum vulgare	cis-acting regulatory element involved in the MeJA-responsiveness	Environment	MeJA
CsSAUR25	CSS0000800.1	597	Arabidopsis thaliana	light responsive element	Environment	Light
CsSAUR25	CSS0000800.1	793	Arabidopsis thaliana		NA	NA
CsSAUR25	CSS0000800.1	398	Pisum sativum		NA	NA
CsSAUR25	CSS0000800.1	1554	Pisum sativum		NA	NA
CsSAUR25	CSS0000800.1	452	Arabidopsis thaliana		NA	NA
CsSAUR25	CSS0000800.1	571	Arabidopsis thaliana		NA	NA
CsSAUR25	CSS0000800.1	295	Nicotiana glutinos		NA	NA
CsSAUR25	CSS0000800.1	232	Arabidopsis thaliana		NA	NA
CsSAUR25	CSS0000800.1	402	Arabidopsis thaliana		NA	NA
CsSAUR25	CSS0000800.1	525	Arabidopsis thaliana		NA	NA
CsSAUR25	CSS0000800.1	596	Arabidopsis thaliana		NA	NA
CsSAUR25	CSS0000800.1	1129	Arabidopsis thaliana		NA	NA
CsSAUR25	CSS0000800.1	1514	Arabidopsis thaliana		NA	NA
CsSAUR25	CSS0000800.1	1606	Arabidopsis thaliana		NA	NA
CsSAUR25	CSS0000800.1	1242	Spinacia oleracea	part of a light responsive element	Environment	Light
CsSAUR25	CSS0000800.1	28	Petroselinum hortense		NA	NA
CsSAUR25	CSS0000800.1	424	Petroselinum hortense		NA	NA
CsSAUR25	CSS0000800.1	1205	Petroselinum hortense		NA	NA
CsSAUR25	CSS0000800.1	1244	Petroselinum hortense		NA	NA
CsSAUR25	CSS0000800.1	1532	Petroselinum hortense		NA	NA
CsSAUR25	CSS0000800.1	1714	Petroselinum hortense		NA	NA
CsSAUR25	CSS0000800.1	1772	Petroselinum hortense		NA	NA
CsSAUR25	CSS0000800.1	1791	Petroselinum hortense		NA	NA
CsSAUR25	CSS0000800.1	1952	Petroselinum hortense		NA	NA
CsSAUR25	CSS0000800.1	1128	Brassica oleracea	gibberellin-responsive element	Phytohormone	Gibberellin
CsSAUR25	CSS0000800.1	1606	Brassica oleracea	gibberellin-responsive element	Phytohormone	Gibberellin
CsSAUR25	CSS0000800.1	1383	Petroselinum crispum	MYB binding site involved in light responsiveness	TF	MYB Binding Site
CsSAUR25	CSS0000800.1	452	Arabidopsis thaliana	MYB binding site involved in drought-inducibility	TF	MYB Binding Site
CsSAUR25	CSS0000800.1	571	Arabidopsis thaliana	MYB binding site involved in drought-inducibility	TF	MYB Binding Site
CsSAUR25	CSS0000800.1	26	organism	short_function	Common	Common
CsSAUR25	CSS0000800.1	58	organism	short_function	Common	Common
CsSAUR25	CSS0000800.1	62	organism	short_function	Common	Common
CsSAUR25	CSS0000800.1	321	organism	short_function	Common	Common
CsSAUR25	CSS0000800.1	357	organism	short_function	Common	Common
CsSAUR25	CSS0000800.1	677	organism	short_function	Common	Common
CsSAUR25	CSS0000800.1	701	organism	short_function	Common	Common
CsSAUR25	CSS0000800.1	884	organism	short_function	Common	Common
CsSAUR25	CSS0000800.1	1008	organism	short_function	Common	Common
CsSAUR25	CSS0000800.1	1499	organism	short_function	Common	Common
CsSAUR25	CSS0000800.1	1523	organism	short_function	Common	Common
CsSAUR25	CSS0000800.1	1548	organism	short_function	Common	Common
CsSAUR25	CSS0000800.1	1767	organism	short_function	Common	Common
CsSAUR25	CSS0000800.1	1779	organism	short_function	Common	Common
CsSAUR25	CSS0000800.1	1807	organism	short_function	Common	Common
CsSAUR25	CSS0000800.1	1812	organism	short_function	Common	Common
CsSAUR25	CSS0000800.1	1978	organism	short_function	Common	Common
CsSAUR25	CSS0000800.1	375	Zea mays	cis-acting regulatory element essential for the anaerobic induction	Environment	Anaerobic
CsSAUR25	CSS0000800.1	637	Zea mays	cis-acting regulatory element essential for the anaerobic induction	Environment	Anaerobic
CsSAUR25	CSS0000800.1	1103	Zea mays	cis-acting regulatory element essential for the anaerobic induction	Environment	Anaerobic
CsSAUR25	CSS0000800.1	192	Arabidopsis thaliana		NA	NA
CsSAUR25	CSS0000800.1	358	Arabidopsis thaliana		NA	NA
CsSAUR25	CSS0000800.1	371	Arabidopsis thaliana		NA	NA
CsSAUR25	CSS0000800.1	583	Arabidopsis thaliana		NA	NA
CsSAUR25	CSS0000800.1	1377	Arabidopsis thaliana		NA	NA
CsSAUR25	CSS0000800.1	1766	Arabidopsis thaliana		NA	NA
CsSAUR25	CSS0000800.1	7	Pisum sativum	common cis-acting element in promoter and enhancer regions	Common	Common
CsSAUR25	CSS0000800.1	98	Nicotiana glutinosa		NA	NA
CsSAUR25	CSS0000800.1	159	Nicotiana glutinosa		NA	NA
CsSAUR25	CSS0000800.1	167	Nicotiana glutinosa		NA	NA
CsSAUR25	CSS0000800.1	183	Nicotiana glutinosa		NA	NA
CsSAUR25	CSS0000800.1	192	Pisum sativum	common cis-acting element in promoter and enhancer regions	Common	Common
CsSAUR25	CSS0000800.1	333	Arabidopsis thaliana	common cis-acting element in promoter and enhancer regions	Common	Common
CsSAUR25	CSS0000800.1	418	Pisum sativum	common cis-acting element in promoter and enhancer regions	Common	Common
CsSAUR25	CSS0000800.1	518	Nicotiana glutinosa		NA	NA
CsSAUR25	CSS0000800.1	590	Nicotiana glutinosa		NA	NA
CsSAUR25	CSS0000800.1	675	Nicotiana glutinosa		NA	NA
CsSAUR25	CSS0000800.1	690	Nicotiana glutinosa		NA	NA
CsSAUR25	CSS0000800.1	731	Pisum sativum	common cis-acting element in promoter and enhancer regions	Common	Common
CsSAUR25	CSS0000800.1	849	Arabidopsis thaliana	common cis-acting element in promoter and enhancer regions	Common	Common
CsSAUR25	CSS0000800.1	969	Nicotiana glutinosa		NA	NA
CsSAUR25	CSS0000800.1	997	Pisum sativum	common cis-acting element in promoter and enhancer regions	Common	Common
CsSAUR25	CSS0000800.1	1094	Nicotiana glutinosa		NA	NA
CsSAUR25	CSS0000800.1	1138	Arabidopsis thaliana	common cis-acting element in promoter and enhancer regions	Common	Common
CsSAUR25	CSS0000800.1	1227	Pisum sativum	common cis-acting element in promoter and enhancer regions	Common	Common
CsSAUR25	CSS0000800.1	1304	Pisum sativum	common cis-acting element in promoter and enhancer regions	Common	Common
CsSAUR25	CSS0000800.1	1307	Nicotiana glutinosa		NA	NA
CsSAUR25	CSS0000800.1	1327	Pisum sativum	common cis-acting element in promoter and enhancer regions	Common	Common
CsSAUR25	CSS0000800.1	1339	Pisum sativum	common cis-acting element in promoter and enhancer regions	Common	Common
CsSAUR25	CSS0000800.1	1340	Arabidopsis thaliana	common cis-acting element in promoter and enhancer regions	Common	Common
CsSAUR25	CSS0000800.1	1342	Arabidopsis thaliana	common cis-acting element in promoter and enhancer regions	Common	Common
CsSAUR25	CSS0000800.1	1371	Nicotiana glutinosa		NA	NA
CsSAUR25	CSS0000800.1	1407	Nicotiana glutinosa		NA	NA
CsSAUR25	CSS0000800.1	1474	Nicotiana glutinosa		NA	NA
CsSAUR25	CSS0000800.1	1587	Arabidopsis thaliana	common cis-acting element in promoter and enhancer regions	Common	Common
CsSAUR25	CSS0000800.1	1629	Nicotiana glutinosa		NA	NA
CsSAUR25	CSS0000800.1	1839	Nicotiana glutinosa		NA	NA
CsSAUR25	CSS0000800.1	1988	Arabidopsis thaliana	common cis-acting element in promoter and enhancer regions	Common	Common
CsSAUR25	CSS0000800.1	1989	Nicotiana glutinosa		NA	NA
CsSAUR25	CSS0000800.1	596	Arabidopsis thaliana		NA	NA
CsSAUR25	CSS0000800.1	36	Arabidopsis thaliana	core promoter element around -30 of transcription start	Common	Common
CsSAUR25	CSS0000800.1	173	Brassica oleracea	core promoter element around -30 of transcription start	Common	Common
CsSAUR25	CSS0000800.1	174	Arabidopsis thaliana	core promoter element around -30 of transcription start	Common	Common
CsSAUR25	CSS0000800.1	236	Helianthus annuus	core promoter element around -30 of transcription start	Common	Common
CsSAUR25	CSS0000800.1	238	Arabidopsis thaliana	core promoter element around -30 of transcription start	Common	Common
CsSAUR25	CSS0000800.1	252	Arabidopsis thaliana	core promoter element around -30 of transcription start	Common	Common
CsSAUR25	CSS0000800.1	260	Arabidopsis thaliana	core promoter element around -30 of transcription start	Common	Common
CsSAUR25	CSS0000800.1	261	Brassica napus	core promoter element around -30 of transcription start	Common	Common
CsSAUR25	CSS0000800.1	262	Arabidopsis thaliana	core promoter element around -30 of transcription start	Common	Common
CsSAUR25	CSS0000800.1	263	Brassica napus	core promoter element around -30 of transcription start	Common	Common
CsSAUR25	CSS0000800.1	264	Arabidopsis thaliana	core promoter element around -30 of transcription start	Common	Common
CsSAUR25	CSS0000800.1	266	Arabidopsis thaliana	core promoter element around -30 of transcription start	Common	Common
CsSAUR25	CSS0000800.1	607	Arabidopsis thaliana	core promoter element around -30 of transcription start	Common	Common
CsSAUR25	CSS0000800.1	813	Brassica napus	core promoter element around -30 of transcription start	Common	Common
CsSAUR25	CSS0000800.1	814	Arabidopsis thaliana	core promoter element around -30 of transcription start	Common	Common
CsSAUR25	CSS0000800.1	844	Arabidopsis thaliana	core promoter element around -30 of transcription start	Common	Common
CsSAUR25	CSS0000800.1	845	Brassica napus	core promoter element around -30 of transcription start	Common	Common
CsSAUR25	CSS0000800.1	846	Arabidopsis thaliana	core promoter element around -30 of transcription start	Common	Common
CsSAUR25	CSS0000800.1	894	Brassica napus	core promoter element around -30 of transcription start	Common	Common
CsSAUR25	CSS0000800.1	895	Arabidopsis thaliana	core promoter element around -30 of transcription start	Common	Common
CsSAUR25	CSS0000800.1	896	Brassica oleracea	core promoter element around -30 of transcription start	Common	Common
CsSAUR25	CSS0000800.1	897	Arabidopsis thaliana	core promoter element around -30 of transcription start	Common	Common
CsSAUR25	CSS0000800.1	929	Brassica napus	core promoter element around -30 of transcription start	Common	Common
CsSAUR25	CSS0000800.1	930	Arabidopsis thaliana	core promoter element around -30 of transcription start	Common	Common
CsSAUR25	CSS0000800.1	931	Arabidopsis thaliana	core promoter element around -30 of transcription start	Common	Common
CsSAUR25	CSS0000800.1	1112	Arabidopsis thaliana	core promoter element around -30 of transcription start	Common	Common
CsSAUR25	CSS0000800.1	1580	Arabidopsis thaliana	core promoter element around -30 of transcription start	Common	Common
CsSAUR25	CSS0000800.1	1581	Arabidopsis thaliana	core promoter element around -30 of transcription start	Common	Common
CsSAUR25	CSS0000800.1	1593	Arabidopsis thaliana	core promoter element around -30 of transcription start	Common	Common
CsSAUR25	CSS0000800.1	1594	Brassica oleracea	core promoter element around -30 of transcription start	Common	Common
CsSAUR25	CSS0000800.1	1595	Arabidopsis thaliana	core promoter element around -30 of transcription start	Common	Common
CsSAUR25	CSS0000800.1	1739	Brassica napus	core promoter element around -30 of transcription start	Common	Common
CsSAUR25	CSS0000800.1	1740	Arabidopsis thaliana	core promoter element around -30 of transcription start	Common	Common
CsSAUR25	CSS0000800.1	1863	Arabidopsis thaliana	core promoter element around -30 of transcription start	Common	Common
CsSAUR25	CSS0000800.1	1867	Arabidopsis thaliana	core promoter element around -30 of transcription start	Common	Common
CsSAUR25	CSS0000800.1	1868	Brassica napus	core promoter element around -30 of transcription start	Common	Common
CsSAUR25	CSS0000800.1	1869	Arabidopsis thaliana	core promoter element around -30 of transcription start	Common	Common
CsSAUR25	CSS0000800.1	1870	Brassica oleracea	core promoter element around -30 of transcription start	Common	Common
CsSAUR25	CSS0000800.1	1871	Arabidopsis thaliana	core promoter element around -30 of transcription start	Common	Common
CsSAUR25	CSS0000800.1	1983	Arabidopsis thaliana	core promoter element around -30 of transcription start	Common	Common
CsSAUR25	CSS0000800.1	1318	Arabidopsis thaliana	part of a module for light response	Environment	Light
CsSAUR25	CSS0000800.1	1610	Arabidopsis thaliana	part of a module for light response	Environment	Light
CsSAUR25	CSS0000800.1	1624	Arabidopsis thaliana	part of a module for light response	Environment	Light
CsSAUR25	CSS0000800.1	1380	Petroselinum hortense		NA	NA
CsSAUR72	CSS0001227.1	342	organism	short_function	Common	Common
CsSAUR72	CSS0001227.1	443	organism	short_function	Common	Common
CsSAUR72	CSS0001227.1	458	organism	short_function	Common	Common
CsSAUR72	CSS0001227.1	507	organism	short_function	Common	Common
CsSAUR72	CSS0001227.1	532	organism	short_function	Common	Common
CsSAUR72	CSS0001227.1	717	organism	short_function	Common	Common
CsSAUR72	CSS0001227.1	734	organism	short_function	Common	Common
CsSAUR72	CSS0001227.1	1008	organism	short_function	Common	Common
CsSAUR72	CSS0001227.1	1034	organism	short_function	Common	Common
CsSAUR72	CSS0001227.1	1144	organism	short_function	Common	Common
CsSAUR72	CSS0001227.1	1302	organism	short_function	Common	Common
CsSAUR72	CSS0001227.1	1521	organism	short_function	Common	Common
CsSAUR72	CSS0001227.1	1560	organism	short_function	Common	Common
CsSAUR72	CSS0001227.1	1579	organism	short_function	Common	Common
CsSAUR72	CSS0001227.1	1655	organism	short_function	Common	Common
CsSAUR72	CSS0001227.1	1774	organism	short_function	Common	Common
CsSAUR72	CSS0001227.1	53	Zea mays	cis-acting regulatory element essential for the anaerobic induction	Environment	Anaerobic
CsSAUR72	CSS0001227.1	156	Zea mays	cis-acting regulatory element essential for the anaerobic induction	Environment	Anaerobic
CsSAUR72	CSS0001227.1	1221	Zea mays	cis-acting regulatory element essential for the anaerobic induction	Environment	Anaerobic
CsSAUR72	CSS0001227.1	1234	Zea mays	cis-acting regulatory element essential for the anaerobic induction	Environment	Anaerobic
CsSAUR72	CSS0001227.1	651	Petroselinum crispum	cis-acting regulatory element	Common	Common
CsSAUR72	CSS0001227.1	673	Lycopersicon esculentum	cis-acting regulatory element involved in light responsiveness	Environment	Light
CsSAUR72	CSS0001227.1	676	Arabidopsis thaliana	cis-acting regulatory element involved in light responsiveness	Environment	Light
CsSAUR72	CSS0001227.1	947	Zea mays	cis-acting regulatory element involved in light responsiveness	Environment	Light
CsSAUR72	CSS0001227.1	1260	Solanum tuberosum	part of a light responsive element	Environment	Light
CsSAUR72	CSS0001227.1	674	Triticum aestivum	cis-acting element involved in the abscisic acid responsiveness	Phytohormone	Abscisic acid
CsSAUR72	CSS0001227.1	676	Arabidopsis thaliana	cis-acting element involved in the abscisic acid responsiveness	Phytohormone	Abscisic acid
CsSAUR72	CSS0001227.1	677	Arabidopsis thaliana	cis-acting element involved in the abscisic acid responsiveness	Phytohormone	Abscisic acid
CsSAUR72	CSS0001227.1	1772	Pisum sativum		NA	NA
CsSAUR72	CSS0001227.1	1477	Arabidopsis thaliana		NA	NA
CsSAUR72	CSS0001227.1	126	Arabidopsis thaliana		NA	NA
CsSAUR72	CSS0001227.1	434	Arabidopsis thaliana		NA	NA
CsSAUR72	CSS0001227.1	1094	Arabidopsis thaliana		NA	NA
CsSAUR72	CSS0001227.1	79	Arabidopsis thaliana	common cis-acting element in promoter and enhancer regions	Common	Common
CsSAUR72	CSS0001227.1	319	Nicotiana glutinosa		NA	NA
CsSAUR72	CSS0001227.1	364	Pisum sativum	common cis-acting element in promoter and enhancer regions	Common	Common
CsSAUR72	CSS0001227.1	428	Nicotiana glutinosa		NA	NA
CsSAUR72	CSS0001227.1	574	Pisum sativum	common cis-acting element in promoter and enhancer regions	Common	Common
CsSAUR72	CSS0001227.1	599	Pisum sativum	common cis-acting element in promoter and enhancer regions	Common	Common
CsSAUR72	CSS0001227.1	662	Nicotiana glutinosa		NA	NA
CsSAUR72	CSS0001227.1	714	Nicotiana glutinosa		NA	NA
CsSAUR72	CSS0001227.1	812	Arabidopsis thaliana	common cis-acting element in promoter and enhancer regions	Common	Common
CsSAUR72	CSS0001227.1	813	Nicotiana glutinosa		NA	NA
CsSAUR72	CSS0001227.1	843	Nicotiana glutinosa		NA	NA
CsSAUR72	CSS0001227.1	845	Nicotiana glutinosa		NA	NA
CsSAUR72	CSS0001227.1	867	Arabidopsis thaliana	common cis-acting element in promoter and enhancer regions	Common	Common
CsSAUR72	CSS0001227.1	869	Arabidopsis thaliana	common cis-acting element in promoter and enhancer regions	Common	Common
CsSAUR72	CSS0001227.1	1200	Arabidopsis thaliana	common cis-acting element in promoter and enhancer regions	Common	Common
CsSAUR72	CSS0001227.1	1333	Nicotiana glutinosa		NA	NA
CsSAUR72	CSS0001227.1	1426	Pisum sativum	common cis-acting element in promoter and enhancer regions	Common	Common
CsSAUR72	CSS0001227.1	1653	Nicotiana glutinosa		NA	NA
CsSAUR72	CSS0001227.1	1677	Nicotiana glutinosa		NA	NA
CsSAUR72	CSS0001227.1	1682	Pisum sativum	common cis-acting element in promoter and enhancer regions	Common	Common
CsSAUR72	CSS0001227.1	1762	Arabidopsis thaliana	common cis-acting element in promoter and enhancer regions	Common	Common
CsSAUR72	CSS0001227.1	1860	Nicotiana glutinosa		NA	NA
CsSAUR72	CSS0001227.1	309	Arabidopsis thaliana		NA	NA
CsSAUR72	CSS0001227.1	364	Arabidopsis thaliana		NA	NA
CsSAUR72	CSS0001227.1	843	Arabidopsis thaliana		NA	NA
CsSAUR72	CSS0001227.1	495	Brassica oleracea	cis-acting element involved in salicylic acid responsiveness	Phytohormone	Salicylic acid
CsSAUR72	CSS0001227.1	603	Oryza sativa	light responsive element	Environment	Light
CsSAUR72	CSS0001227.1	285	Arabidopsis thaliana	core promoter element around -30 of transcription start	Common	Common
CsSAUR72	CSS0001227.1	397	Oryza sativa	core promoter element around -30 of transcription start	Common	Common
CsSAUR72	CSS0001227.1	785	Arabidopsis thaliana	core promoter element around -30 of transcription start	Common	Common
CsSAUR72	CSS0001227.1	1348	Brassica juncea	core promoter element around -30 of transcription start	Common	Common
CsSAUR72	CSS0001227.1	1349	Helianthus annuus	core promoter element around -30 of transcription start	Common	Common
CsSAUR72	CSS0001227.1	1350	Arabidopsis thaliana	core promoter element around -30 of transcription start	Common	Common
CsSAUR72	CSS0001227.1	1351	Arabidopsis thaliana	core promoter element around -30 of transcription start	Common	Common
CsSAUR72	CSS0001227.1	1551	Brassica napus	core promoter element around -30 of transcription start	Common	Common
CsSAUR72	CSS0001227.1	1552	Arabidopsis thaliana	core promoter element around -30 of transcription start	Common	Common
CsSAUR72	CSS0001227.1	1553	Arabidopsis thaliana	core promoter element around -30 of transcription start	Common	Common
CsSAUR72	CSS0001227.1	1671	Arabidopsis thaliana	core promoter element around -30 of transcription start	Common	Common
CsSAUR72	CSS0001227.1	1896	Arabidopsis thaliana	core promoter element around -30 of transcription start	Common	Common
CsSAUR72	CSS0001227.1	1919	Helianthus annuus	core promoter element around -30 of transcription start	Common	Common
CsSAUR72	CSS0001227.1	1921	Arabidopsis thaliana	core promoter element around -30 of transcription start	Common	Common
CsSAUR72	CSS0001227.1	651	Nicotiana tabacum		NA	NA
CsSAUR72	CSS0001227.1	12	Arabidopsis thaliana		NA	NA
CsSAUR72	CSS0001227.1	838	Arabidopsis thaliana		NA	NA
CsSAUR72	CSS0001227.1	1248	Arabidopsis thaliana		NA	NA
CsSAUR72	CSS0001227.1	1958	Arabidopsis thaliana		NA	NA
CsSAUR72	CSS0001227.1	1128	Arabidopsis thaliana	part of a light responsive element	Environment	Light
CsSAUR72	CSS0001227.1	1506	Pisum sativum	part of a light responsive element	Environment	Light
CsSAUR72	CSS0001227.1	469	Oryza sativa	gibberellin-responsive element	Phytohormone	Gibberellin
CsSAUR72	CSS0001227.1	674	Petunia sp.		NA	NA
CsSAUR72	CSS0001227.1	675	Zea mays		NA	NA
CsSAUR72	CSS0001227.1	1097	Zea mays		NA	NA
CsSAUR72	CSS0001227.1	1213	Zea mays		NA	NA
CsSAUR72	CSS0001227.1	1619	Zea mays		NA	NA
CsSAUR72	CSS0001227.1	1569	Avena sativa		NA	NA
CsSAUR72	CSS0001227.1	1570	Avena sativa		NA	NA
CsSAUR72	CSS0001227.1	1544	Nicotiana tabacum		NA	NA
CsSAUR72	CSS0001227.1	651	Petroselinum hortense		NA	NA
CsSAUR72	CSS0001227.1	1778	Helianthus annuus	part of a light responsive element	Environment	Light
CsSAUR72	CSS0001227.1	676	Pisum sativum	cis-acting regulatory element involved in light responsiveness	Environment	Light
CsSAUR72	CSS0001227.1	1777	Zea mays	cis-acting regulatory element involved in zein metabolism regulation	Phytohormone	Zein
CsSAUR72	CSS0001227.1	1874	Pisum sativum		NA	NA
CsSAUR72	CSS0001227.1	126	Arabidopsis thaliana		NA	NA
CsSAUR72	CSS0001227.1	434	Arabidopsis thaliana		NA	NA
CsSAUR72	CSS0001227.1	796	Arabidopsis thaliana		NA	NA
CsSAUR72	CSS0001227.1	1094	Arabidopsis thaliana		NA	NA
CsSAUR72	CSS0001227.1	1544	Arabidopsis thaliana		NA	NA
CsSAUR72	CSS0001227.1	1868	Phaseolus vulgaris		NA	NA
CsSAUR72	CSS0001227.1	424	Petroselinum hortense		NA	NA
CsSAUR72	CSS0001227.1	458	Petroselinum hortense		NA	NA
CsSAUR72	CSS0001227.1	554	Petroselinum hortense		NA	NA
CsSAUR72	CSS0001227.1	628	Petroselinum hortense		NA	NA
CsSAUR72	CSS0001227.1	942	Petroselinum hortense		NA	NA
CsSAUR72	CSS0001227.1	1043	Petroselinum hortense		NA	NA
CsSAUR72	CSS0001227.1	1060	Petroselinum hortense		NA	NA
CsSAUR72	CSS0001227.1	1116	Petroselinum hortense		NA	NA
CsSAUR72	CSS0001227.1	1203	Petroselinum hortense		NA	NA
CsSAUR72	CSS0001227.1	1296	Petroselinum hortense		NA	NA
CsSAUR72	CSS0001227.1	1310	Petroselinum hortense		NA	NA
CsSAUR72	CSS0001227.1	1528	Petroselinum hortense		NA	NA
CsSAUR72	CSS0001227.1	1889	Petroselinum hortense		NA	NA
CsSAUR67	CSS0001989.1	3	Pisum sativum	core promoter element around -30 of transcription start	Common	Common
CsSAUR67	CSS0001989.1	4	Helianthus annuus	core promoter element around -30 of transcription start	Common	Common
CsSAUR67	CSS0001989.1	5	Arabidopsis thaliana	core promoter element around -30 of transcription start	Common	Common
CsSAUR67	CSS0001989.1	6	Arabidopsis thaliana	core promoter element around -30 of transcription start	Common	Common
CsSAUR67	CSS0001989.1	35	Avena sativa	core promoter element around -30 of transcription start	Common	Common
CsSAUR67	CSS0001989.1	37	Daucus carota	core promoter element around -30 of transcription start	Common	Common
CsSAUR67	CSS0001989.1	38	Brassica juncea	core promoter element around -30 of transcription start	Common	Common
CsSAUR67	CSS0001989.1	39	Helianthus annuus	core promoter element around -30 of transcription start	Common	Common
CsSAUR67	CSS0001989.1	40	Arabidopsis thaliana	core promoter element around -30 of transcription start	Common	Common
CsSAUR67	CSS0001989.1	41	Arabidopsis thaliana	core promoter element around -30 of transcription start	Common	Common
CsSAUR67	CSS0001989.1	61	Pisum sativum	core promoter element around -30 of transcription start	Common	Common
CsSAUR67	CSS0001989.1	62	Helianthus annuus	core promoter element around -30 of transcription start	Common	Common
CsSAUR67	CSS0001989.1	63	Arabidopsis thaliana	core promoter element around -30 of transcription start	Common	Common
CsSAUR67	CSS0001989.1	64	Arabidopsis thaliana	core promoter element around -30 of transcription start	Common	Common
CsSAUR67	CSS0001989.1	65	Brassica napus	core promoter element around -30 of transcription start	Common	Common
CsSAUR67	CSS0001989.1	66	Arabidopsis thaliana	core promoter element around -30 of transcription start	Common	Common
CsSAUR67	CSS0001989.1	73	Pisum sativum	core promoter element around -30 of transcription start	Common	Common
CsSAUR67	CSS0001989.1	74	Helianthus annuus	core promoter element around -30 of transcription start	Common	Common
CsSAUR67	CSS0001989.1	75	Arabidopsis thaliana	core promoter element around -30 of transcription start	Common	Common
CsSAUR67	CSS0001989.1	76	Arabidopsis thaliana	core promoter element around -30 of transcription start	Common	Common
CsSAUR67	CSS0001989.1	142	Pisum sativum	core promoter element around -30 of transcription start	Common	Common
CsSAUR67	CSS0001989.1	143	Helianthus annuus	core promoter element around -30 of transcription start	Common	Common
CsSAUR67	CSS0001989.1	144	Arabidopsis thaliana	core promoter element around -30 of transcription start	Common	Common
CsSAUR67	CSS0001989.1	145	Arabidopsis thaliana	core promoter element around -30 of transcription start	Common	Common
CsSAUR67	CSS0001989.1	330	Avena sativa	core promoter element around -30 of transcription start	Common	Common
CsSAUR67	CSS0001989.1	333	Pisum sativum	core promoter element around -30 of transcription start	Common	Common
CsSAUR67	CSS0001989.1	334	Helianthus annuus	core promoter element around -30 of transcription start	Common	Common
CsSAUR67	CSS0001989.1	335	Arabidopsis thaliana	core promoter element around -30 of transcription start	Common	Common
CsSAUR67	CSS0001989.1	336	Arabidopsis thaliana	core promoter element around -30 of transcription start	Common	Common
CsSAUR67	CSS0001989.1	448	Arabidopsis thaliana	core promoter element around -30 of transcription start	Common	Common
CsSAUR67	CSS0001989.1	482	Arabidopsis thaliana	core promoter element around -30 of transcription start	Common	Common
CsSAUR67	CSS0001989.1	491	Arabidopsis thaliana	core promoter element around -30 of transcription start	Common	Common
CsSAUR67	CSS0001989.1	508	Arabidopsis thaliana	core promoter element around -30 of transcription start	Common	Common
CsSAUR67	CSS0001989.1	710	Pisum sativum	core promoter element around -30 of transcription start	Common	Common
CsSAUR67	CSS0001989.1	711	Helianthus annuus	core promoter element around -30 of transcription start	Common	Common
CsSAUR67	CSS0001989.1	712	Arabidopsis thaliana	core promoter element around -30 of transcription start	Common	Common
CsSAUR67	CSS0001989.1	713	Arabidopsis thaliana	core promoter element around -30 of transcription start	Common	Common
CsSAUR67	CSS0001989.1	720	Arabidopsis thaliana	core promoter element around -30 of transcription start	Common	Common
CsSAUR67	CSS0001989.1	1056	Arabidopsis thaliana	core promoter element around -30 of transcription start	Common	Common
CsSAUR67	CSS0001989.1	1057	Arabidopsis thaliana	core promoter element around -30 of transcription start	Common	Common
CsSAUR67	CSS0001989.1	1135	Helianthus annuus	core promoter element around -30 of transcription start	Common	Common
CsSAUR67	CSS0001989.1	1136	Arabidopsis thaliana	core promoter element around -30 of transcription start	Common	Common
CsSAUR67	CSS0001989.1	1137	Arabidopsis thaliana	core promoter element around -30 of transcription start	Common	Common
CsSAUR67	CSS0001989.1	1182	Pisum sativum	core promoter element around -30 of transcription start	Common	Common
CsSAUR67	CSS0001989.1	1183	Helianthus annuus	core promoter element around -30 of transcription start	Common	Common
CsSAUR67	CSS0001989.1	1184	Arabidopsis thaliana	core promoter element around -30 of transcription start	Common	Common
CsSAUR67	CSS0001989.1	1185	Arabidopsis thaliana	core promoter element around -30 of transcription start	Common	Common
CsSAUR67	CSS0001989.1	1209	Brassica napus	core promoter element around -30 of transcription start	Common	Common
CsSAUR67	CSS0001989.1	1210	Arabidopsis thaliana	core promoter element around -30 of transcription start	Common	Common
CsSAUR67	CSS0001989.1	1211	Arabidopsis thaliana	core promoter element around -30 of transcription start	Common	Common
CsSAUR67	CSS0001989.1	1228	Brassica napus	core promoter element around -30 of transcription start	Common	Common
CsSAUR67	CSS0001989.1	1229	Arabidopsis thaliana	core promoter element around -30 of transcription start	Common	Common
CsSAUR67	CSS0001989.1	1230	Arabidopsis thaliana	core promoter element around -30 of transcription start	Common	Common
CsSAUR67	CSS0001989.1	1310	Arabidopsis thaliana	core promoter element around -30 of transcription start	Common	Common
CsSAUR67	CSS0001989.1	1324	Arabidopsis thaliana	core promoter element around -30 of transcription start	Common	Common
CsSAUR67	CSS0001989.1	1325	Arabidopsis thaliana	core promoter element around -30 of transcription start	Common	Common
CsSAUR67	CSS0001989.1	1361	Arabidopsis thaliana	core promoter element around -30 of transcription start	Common	Common
CsSAUR67	CSS0001989.1	1457	Arabidopsis thaliana	core promoter element around -30 of transcription start	Common	Common
CsSAUR67	CSS0001989.1	1647	Brassica napus	core promoter element around -30 of transcription start	Common	Common
CsSAUR67	CSS0001989.1	1648	Arabidopsis thaliana	core promoter element around -30 of transcription start	Common	Common
CsSAUR67	CSS0001989.1	1649	Arabidopsis thaliana	core promoter element around -30 of transcription start	Common	Common
CsSAUR67	CSS0001989.1	1654	Oryza sativa	core promoter element around -30 of transcription start	Common	Common
CsSAUR67	CSS0001989.1	1713	Brassica oleracea	core promoter element around -30 of transcription start	Common	Common
CsSAUR67	CSS0001989.1	1714	Arabidopsis thaliana	core promoter element around -30 of transcription start	Common	Common
CsSAUR67	CSS0001989.1	1838	Arabidopsis thaliana	core promoter element around -30 of transcription start	Common	Common
CsSAUR67	CSS0001989.1	1897	Pisum sativum	core promoter element around -30 of transcription start	Common	Common
CsSAUR67	CSS0001989.1	1898	Helianthus annuus	core promoter element around -30 of transcription start	Common	Common
CsSAUR67	CSS0001989.1	1899	Arabidopsis thaliana	core promoter element around -30 of transcription start	Common	Common
CsSAUR67	CSS0001989.1	1900	Arabidopsis thaliana	core promoter element around -30 of transcription start	Common	Common
CsSAUR67	CSS0001989.1	204	Zea mays		NA	NA
CsSAUR67	CSS0001989.1	69	Nicotiana glutinosa		NA	NA
CsSAUR67	CSS0001989.1	138	Nicotiana glutinosa		NA	NA
CsSAUR67	CSS0001989.1	189	Nicotiana glutinosa		NA	NA
CsSAUR67	CSS0001989.1	256	Nicotiana glutinosa		NA	NA
CsSAUR67	CSS0001989.1	358	Pisum sativum	common cis-acting element in promoter and enhancer regions	Common	Common
CsSAUR67	CSS0001989.1	370	Pisum sativum	common cis-acting element in promoter and enhancer regions	Common	Common
CsSAUR67	CSS0001989.1	396	Pisum sativum	common cis-acting element in promoter and enhancer regions	Common	Common
CsSAUR67	CSS0001989.1	427	Nicotiana glutinosa		NA	NA
CsSAUR67	CSS0001989.1	429	Nicotiana glutinosa		NA	NA
CsSAUR67	CSS0001989.1	445	Nicotiana glutinosa		NA	NA
CsSAUR67	CSS0001989.1	590	Nicotiana glutinosa		NA	NA
CsSAUR67	CSS0001989.1	603	Nicotiana glutinosa		NA	NA
CsSAUR67	CSS0001989.1	678	Pisum sativum	common cis-acting element in promoter and enhancer regions	Common	Common
CsSAUR67	CSS0001989.1	820	Pisum sativum	common cis-acting element in promoter and enhancer regions	Common	Common
CsSAUR67	CSS0001989.1	913	Nicotiana glutinosa		NA	NA
CsSAUR67	CSS0001989.1	1071	Pisum sativum	common cis-acting element in promoter and enhancer regions	Common	Common
CsSAUR67	CSS0001989.1	1093	Nicotiana glutinosa		NA	NA
CsSAUR67	CSS0001989.1	1100	Arabidopsis thaliana	common cis-acting element in promoter and enhancer regions	Common	Common
CsSAUR67	CSS0001989.1	1101	Nicotiana glutinosa		NA	NA
CsSAUR67	CSS0001989.1	1163	Nicotiana glutinosa		NA	NA
CsSAUR67	CSS0001989.1	1222	Nicotiana glutinosa		NA	NA
CsSAUR67	CSS0001989.1	1233	Pisum sativum	common cis-acting element in promoter and enhancer regions	Common	Common
CsSAUR67	CSS0001989.1	1315	Nicotiana glutinosa		NA	NA
CsSAUR67	CSS0001989.1	1446	Arabidopsis thaliana	common cis-acting element in promoter and enhancer regions	Common	Common
CsSAUR67	CSS0001989.1	1447	Nicotiana glutinosa		NA	NA
CsSAUR67	CSS0001989.1	1473	Nicotiana glutinosa		NA	NA
CsSAUR67	CSS0001989.1	1524	Pisum sativum	common cis-acting element in promoter and enhancer regions	Common	Common
CsSAUR67	CSS0001989.1	1660	Nicotiana glutinosa		NA	NA
CsSAUR67	CSS0001989.1	1701	Nicotiana glutinosa		NA	NA
CsSAUR67	CSS0001989.1	1765	Nicotiana glutinosa		NA	NA
CsSAUR67	CSS0001989.1	1909	Nicotiana glutinosa		NA	NA
CsSAUR67	CSS0001989.1	1967	Nicotiana glutinosa		NA	NA
CsSAUR67	CSS0001989.1	1994	Nicotiana glutinosa		NA	NA
CsSAUR67	CSS0001989.1	357	Arabidopsis thaliana		NA	NA
CsSAUR67	CSS0001989.1	427	Arabidopsis thaliana		NA	NA
CsSAUR67	CSS0001989.1	879	Arabidopsis thaliana		NA	NA
CsSAUR67	CSS0001989.1	1490	Arabidopsis thaliana		NA	NA
CsSAUR67	CSS0001989.1	566	Arabidopsis thaliana		NA	NA
CsSAUR67	CSS0001989.1	617	Arabidopsis thaliana		NA	NA
CsSAUR67	CSS0001989.1	674	Arabidopsis thaliana		NA	NA
CsSAUR67	CSS0001989.1	204	Zea mays		NA	NA
CsSAUR67	CSS0001989.1	1753	Zea mays		NA	NA
CsSAUR67	CSS0001989.1	964	Arabidopsis thaliana	cis-acting regulatory element related to meristem expression	Tissue	Meristem
CsSAUR67	CSS0001989.1	980	Arabidopsis thaliana	cis-acting regulatory element related to meristem expression	Tissue	Meristem
CsSAUR67	CSS0001989.1	1776	Arabidopsis thaliana	part of a module for light response	Environment	Light
CsSAUR67	CSS0001989.1	273	Brassica oleracea	auxin-responsive element	Phytohormone	Auxin
CsSAUR67	CSS0001989.1	550	organism	short_function	Common	Common
CsSAUR67	CSS0001989.1	658	organism	short_function	Common	Common
CsSAUR67	CSS0001989.1	1891	organism	short_function	Common	Common
CsSAUR67	CSS0001989.1	52	Zea mays	part of a light responsive element	Environment	Light
CsSAUR67	CSS0001989.1	121	Zea mays	part of a light responsive element	Environment	Light
CsSAUR67	CSS0001989.1	205	Arabidopsis thaliana	cis-acting element involved in the abscisic acid responsiveness	Phytohormone	Abscisic acid
CsSAUR67	CSS0001989.1	203	Brassica napus	cis-acting regulatory element involved in light responsiveness	Environment	Light
CsSAUR67	CSS0001989.1	204	Arabidopsis thaliana	cis-acting regulatory element involved in light responsiveness	Environment	Light
CsSAUR67	CSS0001989.1	862	Arabidopsis thaliana		NA	NA
CsSAUR67	CSS0001989.1	313	Avena sativa	light responsive element	Environment	Light
CsSAUR67	CSS0001989.1	314	Arabidopsis thaliana	light responsive element	Environment	Light
CsSAUR67	CSS0001989.1	919	Petroselinum hortense		NA	NA
CsSAUR67	CSS0001989.1	928	Petroselinum hortense		NA	NA
CsSAUR67	CSS0001989.1	1119	Petroselinum hortense		NA	NA
CsSAUR67	CSS0001989.1	1572	Petroselinum hortense		NA	NA
CsSAUR67	CSS0001989.1	1614	Petroselinum hortense		NA	NA
CsSAUR67	CSS0001989.1	1727	Petroselinum hortense		NA	NA
CsSAUR67	CSS0001989.1	1758	Petroselinum hortense		NA	NA
CsSAUR67	CSS0001989.1	1859	Petroselinum hortense		NA	NA
CsSAUR67	CSS0001989.1	1888	Petroselinum hortense		NA	NA
CsSAUR67	CSS0001989.1	1464	Petroselinum crispum	MYB binding site involved in light responsiveness	TF	MYB Binding Site
CsSAUR67	CSS0001989.1	1583	Petroselinum crispum	MYB binding site involved in light responsiveness	TF	MYB Binding Site
CsSAUR67	CSS0001989.1	566	Arabidopsis thaliana		NA	NA
CsSAUR67	CSS0001989.1	617	Arabidopsis thaliana		NA	NA
CsSAUR67	CSS0001989.1	674	Arabidopsis thaliana		NA	NA
CsSAUR67	CSS0001989.1	506	Nicotiana glutinos		NA	NA
CsSAUR67	CSS0001989.1	517	Nicotiana glutinos		NA	NA
CsSAUR67	CSS0001989.1	531	Nicotiana glutinos		NA	NA
CsSAUR67	CSS0001989.1	862	Hordeum vulgare	cis-acting regulatory element involved in the MeJA-responsiveness	Environment	MeJA
CsSAUR67	CSS0001989.1	870	Arabidopsis thaliana		NA	NA
CsSAUR67	CSS0001989.1	215	Nicotiana glutinosa		NA	NA
CsSAUR67	CSS0001989.1	216	Nicotiana glutinosa		NA	NA
CsSAUR67	CSS0001989.1	62	Arabidopsis thaliana		NA	NA
CsSAUR67	CSS0001989.1	64	Arabidopsis thaliana		NA	NA
CsSAUR67	CSS0001989.1	862	Hordeum vulgare	cis-acting regulatory element involved in the MeJA-responsiveness	Environment	MeJA
CsSAUR67	CSS0001989.1	353	Arabidopsis thaliana	part of a light responsive element	Environment	Light
CsSAUR67	CSS0001989.1	1754	Zea mays	enhancer-like element involved in anoxic specific inducibility	Environment	Anoxic
CsSAUR67	CSS0001989.1	713	Arabidopsis thaliana		NA	NA
CsSAUR67	CSS0001989.1	1181	Arabidopsis thaliana		NA	NA
CsSAUR67	CSS0001989.1	1707	Avena sativa		NA	NA
CsSAUR67	CSS0001989.1	206	Zea mays		NA	NA
CsSAUR67	CSS0001989.1	11	Petroselinum crispum	part of a conserved DNA module involved in light responsiveness	Environment	Light
CsSAUR67	CSS0001989.1	81	Petroselinum crispum	part of a conserved DNA module involved in light responsiveness	Environment	Light
CsSAUR67	CSS0001989.1	150	Petroselinum crispum	part of a conserved DNA module involved in light responsiveness	Environment	Light
CsSAUR67	CSS0001989.1	323	Petroselinum crispum	part of a conserved DNA module involved in light responsiveness	Environment	Light
CsSAUR67	CSS0001989.1	592	Petroselinum crispum	part of a conserved DNA module involved in light responsiveness	Environment	Light
CsSAUR67	CSS0001989.1	700	Petroselinum crispum	part of a conserved DNA module involved in light responsiveness	Environment	Light
CsSAUR24	CSS0002210.1	254	Arabidopsis thaliana		NA	NA
CsSAUR24	CSS0002210.1	685	Arabidopsis thaliana		NA	NA
CsSAUR24	CSS0002210.1	720	Arabidopsis thaliana		NA	NA
CsSAUR24	CSS0002210.1	1167	Arabidopsis thaliana		NA	NA
CsSAUR24	CSS0002210.1	1360	Arabidopsis thaliana		NA	NA
CsSAUR24	CSS0002210.1	1505	Arabidopsis thaliana		NA	NA
CsSAUR24	CSS0002210.1	1669	Arabidopsis thaliana		NA	NA
CsSAUR24	CSS0002210.1	1677	Arabidopsis thaliana		NA	NA
CsSAUR24	CSS0002210.1	1716	Arabidopsis thaliana		NA	NA
CsSAUR24	CSS0002210.1	1791	Arabidopsis thaliana		NA	NA
CsSAUR24	CSS0002210.1	1858	Arabidopsis thaliana		NA	NA
CsSAUR24	CSS0002210.1	25	Nicotiana glutinosa		NA	NA
CsSAUR24	CSS0002210.1	112	Pisum sativum	common cis-acting element in promoter and enhancer regions	Common	Common
CsSAUR24	CSS0002210.1	181	Pisum sativum	common cis-acting element in promoter and enhancer regions	Common	Common
CsSAUR24	CSS0002210.1	187	Pisum sativum	common cis-acting element in promoter and enhancer regions	Common	Common
CsSAUR24	CSS0002210.1	197	Arabidopsis thaliana	common cis-acting element in promoter and enhancer regions	Common	Common
CsSAUR24	CSS0002210.1	198	Nicotiana glutinosa		NA	NA
CsSAUR24	CSS0002210.1	239	Nicotiana glutinosa		NA	NA
CsSAUR24	CSS0002210.1	254	Nicotiana glutinosa		NA	NA
CsSAUR24	CSS0002210.1	256	Arabidopsis thaliana	common cis-acting element in promoter and enhancer regions	Common	Common
CsSAUR24	CSS0002210.1	263	Nicotiana glutinosa		NA	NA
CsSAUR24	CSS0002210.1	300	Nicotiana glutinosa		NA	NA
CsSAUR24	CSS0002210.1	317	Nicotiana glutinosa		NA	NA
CsSAUR24	CSS0002210.1	352	Pisum sativum	common cis-acting element in promoter and enhancer regions	Common	Common
CsSAUR24	CSS0002210.1	379	Nicotiana glutinosa		NA	NA
CsSAUR24	CSS0002210.1	413	Nicotiana glutinosa		NA	NA
CsSAUR24	CSS0002210.1	457	Nicotiana glutinosa		NA	NA
CsSAUR24	CSS0002210.1	462	Nicotiana glutinosa		NA	NA
CsSAUR24	CSS0002210.1	546	Nicotiana glutinosa		NA	NA
CsSAUR24	CSS0002210.1	703	Pisum sativum	common cis-acting element in promoter and enhancer regions	Common	Common
CsSAUR24	CSS0002210.1	721	Pisum sativum	common cis-acting element in promoter and enhancer regions	Common	Common
CsSAUR24	CSS0002210.1	748	Pisum sativum	common cis-acting element in promoter and enhancer regions	Common	Common
CsSAUR24	CSS0002210.1	836	Pisum sativum	common cis-acting element in promoter and enhancer regions	Common	Common
CsSAUR24	CSS0002210.1	928	Pisum sativum	common cis-acting element in promoter and enhancer regions	Common	Common
CsSAUR24	CSS0002210.1	933	Arabidopsis thaliana	common cis-acting element in promoter and enhancer regions	Common	Common
CsSAUR24	CSS0002210.1	934	Nicotiana glutinosa		NA	NA
CsSAUR24	CSS0002210.1	965	Nicotiana glutinosa		NA	NA
CsSAUR24	CSS0002210.1	1016	Arabidopsis thaliana	common cis-acting element in promoter and enhancer regions	Common	Common
CsSAUR24	CSS0002210.1	1017	Nicotiana glutinosa		NA	NA
CsSAUR24	CSS0002210.1	1062	Pisum sativum	common cis-acting element in promoter and enhancer regions	Common	Common
CsSAUR24	CSS0002210.1	1167	Pisum sativum	common cis-acting element in promoter and enhancer regions	Common	Common
CsSAUR24	CSS0002210.1	1190	Nicotiana glutinosa		NA	NA
CsSAUR24	CSS0002210.1	1239	Nicotiana glutinosa		NA	NA
CsSAUR24	CSS0002210.1	1288	Nicotiana glutinosa		NA	NA
CsSAUR24	CSS0002210.1	1292	Arabidopsis thaliana	common cis-acting element in promoter and enhancer regions	Common	Common
CsSAUR24	CSS0002210.1	1293	Nicotiana glutinosa		NA	NA
CsSAUR24	CSS0002210.1	1307	Pisum sativum	common cis-acting element in promoter and enhancer regions	Common	Common
CsSAUR24	CSS0002210.1	1313	Nicotiana glutinosa		NA	NA
CsSAUR24	CSS0002210.1	1325	Arabidopsis thaliana	common cis-acting element in promoter and enhancer regions	Common	Common
CsSAUR24	CSS0002210.1	1326	Nicotiana glutinosa		NA	NA
CsSAUR24	CSS0002210.1	1360	Nicotiana glutinosa		NA	NA
CsSAUR24	CSS0002210.1	1362	Arabidopsis thaliana	common cis-acting element in promoter and enhancer regions	Common	Common
CsSAUR24	CSS0002210.1	1378	Nicotiana glutinosa		NA	NA
CsSAUR24	CSS0002210.1	1445	Arabidopsis thaliana	common cis-acting element in promoter and enhancer regions	Common	Common
CsSAUR24	CSS0002210.1	1446	Nicotiana glutinosa		NA	NA
CsSAUR24	CSS0002210.1	1590	Nicotiana glutinosa		NA	NA
CsSAUR24	CSS0002210.1	1605	Pisum sativum	common cis-acting element in promoter and enhancer regions	Common	Common
CsSAUR24	CSS0002210.1	1649	Pisum sativum	common cis-acting element in promoter and enhancer regions	Common	Common
CsSAUR24	CSS0002210.1	1656	Arabidopsis thaliana	common cis-acting element in promoter and enhancer regions	Common	Common
CsSAUR24	CSS0002210.1	1657	Nicotiana glutinosa		NA	NA
CsSAUR24	CSS0002210.1	1670	Pisum sativum	common cis-acting element in promoter and enhancer regions	Common	Common
CsSAUR24	CSS0002210.1	1677	Nicotiana glutinosa		NA	NA
CsSAUR24	CSS0002210.1	1679	Arabidopsis thaliana	common cis-acting element in promoter and enhancer regions	Common	Common
CsSAUR24	CSS0002210.1	1716	Pisum sativum	common cis-acting element in promoter and enhancer regions	Common	Common
CsSAUR24	CSS0002210.1	1735	Pisum sativum	common cis-acting element in promoter and enhancer regions	Common	Common
CsSAUR24	CSS0002210.1	1738	Pisum sativum	common cis-acting element in promoter and enhancer regions	Common	Common
CsSAUR24	CSS0002210.1	1834	Nicotiana glutinosa		NA	NA
CsSAUR24	CSS0002210.1	1859	Pisum sativum	common cis-acting element in promoter and enhancer regions	Common	Common
CsSAUR24	CSS0002210.1	1910	Nicotiana glutinosa		NA	NA
CsSAUR24	CSS0002210.1	1939	Nicotiana glutinosa		NA	NA
CsSAUR24	CSS0002210.1	1963	Arabidopsis thaliana	common cis-acting element in promoter and enhancer regions	Common	Common
CsSAUR24	CSS0002210.1	1964	Nicotiana glutinosa		NA	NA
CsSAUR24	CSS0002210.1	1013	Arabidopsis thaliana		NA	NA
CsSAUR24	CSS0002210.1	320	Oryza sativa	core promoter element around -30 of transcription start	Common	Common
CsSAUR24	CSS0002210.1	335	Brassica napus	core promoter element around -30 of transcription start	Common	Common
CsSAUR24	CSS0002210.1	336	Arabidopsis thaliana	core promoter element around -30 of transcription start	Common	Common
CsSAUR24	CSS0002210.1	337	Arabidopsis thaliana	core promoter element around -30 of transcription start	Common	Common
CsSAUR24	CSS0002210.1	479	Arabidopsis thaliana	core promoter element around -30 of transcription start	Common	Common
CsSAUR24	CSS0002210.1	540	Arabidopsis thaliana	core promoter element around -30 of transcription start	Common	Common
CsSAUR24	CSS0002210.1	542	Arabidopsis thaliana	core promoter element around -30 of transcription start	Common	Common
CsSAUR24	CSS0002210.1	612	Brassica napus	core promoter element around -30 of transcription start	Common	Common
CsSAUR24	CSS0002210.1	613	Arabidopsis thaliana	core promoter element around -30 of transcription start	Common	Common
CsSAUR24	CSS0002210.1	731	Brassica napus	core promoter element around -30 of transcription start	Common	Common
CsSAUR24	CSS0002210.1	732	Arabidopsis thaliana	core promoter element around -30 of transcription start	Common	Common
CsSAUR24	CSS0002210.1	733	Arabidopsis thaliana	core promoter element around -30 of transcription start	Common	Common
CsSAUR24	CSS0002210.1	1397	Brassica napus	core promoter element around -30 of transcription start	Common	Common
CsSAUR24	CSS0002210.1	1398	Arabidopsis thaliana	core promoter element around -30 of transcription start	Common	Common
CsSAUR24	CSS0002210.1	1684	Brassica napus	core promoter element around -30 of transcription start	Common	Common
CsSAUR24	CSS0002210.1	1685	Arabidopsis thaliana	core promoter element around -30 of transcription start	Common	Common
CsSAUR24	CSS0002210.1	1771	Arabidopsis thaliana	core promoter element around -30 of transcription start	Common	Common
CsSAUR24	CSS0002210.1	1772	Oryza sativa	core promoter element around -30 of transcription start	Common	Common
CsSAUR24	CSS0002210.1	1877	Arabidopsis thaliana	core promoter element around -30 of transcription start	Common	Common
CsSAUR24	CSS0002210.1	1891	Arabidopsis thaliana	core promoter element around -30 of transcription start	Common	Common
CsSAUR24	CSS0002210.1	1892	Brassica napus	core promoter element around -30 of transcription start	Common	Common
CsSAUR24	CSS0002210.1	1893	Arabidopsis thaliana	core promoter element around -30 of transcription start	Common	Common
CsSAUR24	CSS0002210.1	1894	Brassica napus	core promoter element around -30 of transcription start	Common	Common
CsSAUR24	CSS0002210.1	1895	Arabidopsis thaliana	core promoter element around -30 of transcription start	Common	Common
CsSAUR24	CSS0002210.1	202	Oryza sativa	light responsive element	Environment	Light
CsSAUR24	CSS0002210.1	852	Nicotiana tabacum	cis-acting element involved in salicylic acid responsiveness	Phytohormone	Salicylic acid
CsSAUR24	CSS0002210.1	472	Arabidopsis thaliana	part of a module for light response	Environment	Light
CsSAUR24	CSS0002210.1	1428	Petroselinum hortense		NA	NA
CsSAUR24	CSS0002210.1	1080	Arabidopsis thaliana	cis-acting regulatory element related to meristem expression	Tissue	Meristem
CsSAUR24	CSS0002210.1	1091	Arabidopsis thaliana	cis-acting regulatory element related to meristem expression	Tissue	Meristem
CsSAUR24	CSS0002210.1	1101	Lycopersicon esculentum	cis-acting regulatory element involved in circadian control	Stage	Circadian
CsSAUR24	CSS0002210.1	1518	Arabidopsis thaliana	MYB binding site involved in drought-inducibility	TF	MYB Binding Site
CsSAUR24	CSS0002210.1	1564	Arabidopsis thaliana	MYB binding site involved in drought-inducibility	TF	MYB Binding Site
CsSAUR24	CSS0002210.1	34	Zea mays	cis-acting regulatory element essential for the anaerobic induction	Environment	Anaerobic
CsSAUR24	CSS0002210.1	1341	Zea mays	cis-acting regulatory element essential for the anaerobic induction	Environment	Anaerobic
CsSAUR24	CSS0002210.1	1755	Zea mays	cis-acting regulatory element essential for the anaerobic induction	Environment	Anaerobic
CsSAUR24	CSS0002210.1	56	organism	short_function	Common	Common
CsSAUR24	CSS0002210.1	60	organism	short_function	Common	Common
CsSAUR24	CSS0002210.1	92	organism	short_function	Common	Common
CsSAUR24	CSS0002210.1	233	organism	short_function	Common	Common
CsSAUR24	CSS0002210.1	347	organism	short_function	Common	Common
CsSAUR24	CSS0002210.1	385	organism	short_function	Common	Common
CsSAUR24	CSS0002210.1	599	organism	short_function	Common	Common
CsSAUR24	CSS0002210.1	921	organism	short_function	Common	Common
CsSAUR24	CSS0002210.1	1244	organism	short_function	Common	Common
CsSAUR24	CSS0002210.1	1248	organism	short_function	Common	Common
CsSAUR24	CSS0002210.1	1349	organism	short_function	Common	Common
CsSAUR24	CSS0002210.1	1745	organism	short_function	Common	Common
CsSAUR24	CSS0002210.1	1841	organism	short_function	Common	Common
CsSAUR24	CSS0002210.1	1918	organism	short_function	Common	Common
CsSAUR24	CSS0002210.1	1958	organism	short_function	Common	Common
CsSAUR24	CSS0002210.1	1266	Solanum tuberosum	part of a light responsive element	Environment	Light
CsSAUR24	CSS0002210.1	1480	Oryza sativa	cis-acting element involved in gibberellin-responsiveness	Phytohormone	gibberellin
CsSAUR24	CSS0002210.1	231	Pisum sativum		NA	NA
CsSAUR24	CSS0002210.1	1518	Arabidopsis thaliana		NA	NA
CsSAUR24	CSS0002210.1	1564	Arabidopsis thaliana		NA	NA
CsSAUR24	CSS0002210.1	1069	Pisum sativum		NA	NA
CsSAUR24	CSS0002210.1	1013	Arabidopsis thaliana		NA	NA
CsSAUR24	CSS0002210.1	1390	Arabidopsis thaliana		NA	NA
CsSAUR24	CSS0002210.1	1598	Arabidopsis thaliana		NA	NA
CsSAUR24	CSS0002210.1	1299	Nicotiana glutinos		NA	NA
CsSAUR24	CSS0002210.1	1598	Brassica oleracea	gibberellin-responsive element	Phytohormone	Gibberellin
CsSAUR24	CSS0002210.1	92	Petroselinum hortense		NA	NA
CsSAUR24	CSS0002210.1	224	Petroselinum hortense		NA	NA
CsSAUR24	CSS0002210.1	627	Petroselinum hortense		NA	NA
CsSAUR24	CSS0002210.1	690	Petroselinum hortense		NA	NA
CsSAUR24	CSS0002210.1	860	Petroselinum hortense		NA	NA
CsSAUR24	CSS0002210.1	923	Petroselinum hortense		NA	NA
CsSAUR24	CSS0002210.1	1045	Petroselinum hortense		NA	NA
CsSAUR24	CSS0002210.1	1126	Petroselinum hortense		NA	NA
CsSAUR24	CSS0002210.1	1436	Petroselinum hortense		NA	NA
CsSAUR24	CSS0002210.1	1780	Petroselinum hortense		NA	NA
CsSAUR24	CSS0002210.1	1855	Petroselinum hortense		NA	NA
CsSAUR24	CSS0002210.1	814	Petroselinum crispum	MYB binding site involved in light responsiveness	TF	MYB Binding Site
CsSAUR24	CSS0002210.1	269	Oryza sativa	cis-regulatory element involved in endosperm expression	Tissue	Endosperm
CsSAUR24	CSS0002210.1	1609	Arabidopsis thaliana	part of a light responsive element	Environment	Light
CsSAUR24	CSS0002210.1	862	Arabidopsis thaliana		NA	NA
CsSAUR24	CSS0002210.1	1800	Arabidopsis thaliana		NA	NA
CsSAUR24	CSS0002210.1	260	Arabidopsis thaliana		NA	NA
CsSAUR24	CSS0002210.1	1314	Arabidopsis thaliana		NA	NA
CsSAUR24	CSS0002210.1	1583	Arabidopsis thaliana		NA	NA
CsSAUR24	CSS0002210.1	1674	Arabidopsis thaliana		NA	NA
CsSAUR24	CSS0002210.1	540	Arabidopsis thaliana		NA	NA
CsSAUR24	CSS0002210.1	1891	Arabidopsis thaliana		NA	NA
CsSAUR24	CSS0002210.1	1893	Arabidopsis thaliana		NA	NA
CsSAUR24	CSS0002210.1	18	Pisum sativum	part of a light responsive element	Environment	Light
CsSAUR24	CSS0002210.1	358	Avena sativa		NA	NA
CsSAUR24	CSS0002210.1	429	Avena sativa		NA	NA
CsSAUR24	CSS0002210.1	1390	Nicotiana tabacum		NA	NA
CsSAUR24	CSS0002210.1	1598	Nicotiana tabacum		NA	NA
CsSAUR24	CSS0002210.1	203	Arabidopsis thaliana		NA	NA
CsSAUR24	CSS0002210.1	419	Petroselinum crispum	part of a conserved DNA module involved in light responsiveness	Environment	Light
CsSAUR24	CSS0002210.1	1167	Arabidopsis thaliana	part of a light responsive element	Environment	Light
CsSAUR11	CSS0002448.1	688	Pisum sativum	element for maximal elicitor-mediated activation (2copies)	Environment	Elicitor
CsSAUR11	CSS0002448.1	992	Arabidopsis thaliana		NA	NA
CsSAUR11	CSS0002448.1	226	Arabidopsis thaliana		NA	NA
CsSAUR11	CSS0002448.1	622	Arabidopsis thaliana		NA	NA
CsSAUR11	CSS0002448.1	1868	Arabidopsis thaliana		NA	NA
CsSAUR11	CSS0002448.1	58	Nicotiana glutinosa		NA	NA
CsSAUR11	CSS0002448.1	100	Nicotiana glutinosa		NA	NA
CsSAUR11	CSS0002448.1	350	Pisum sativum	common cis-acting element in promoter and enhancer regions	Common	Common
CsSAUR11	CSS0002448.1	381	Nicotiana glutinosa		NA	NA
CsSAUR11	CSS0002448.1	402	Pisum sativum	common cis-acting element in promoter and enhancer regions	Common	Common
CsSAUR11	CSS0002448.1	433	Nicotiana glutinosa		NA	NA
CsSAUR11	CSS0002448.1	599	Nicotiana glutinosa		NA	NA
CsSAUR11	CSS0002448.1	615	Pisum sativum	common cis-acting element in promoter and enhancer regions	Common	Common
CsSAUR11	CSS0002448.1	622	Pisum sativum	common cis-acting element in promoter and enhancer regions	Common	Common
CsSAUR11	CSS0002448.1	643	Nicotiana glutinosa		NA	NA
CsSAUR11	CSS0002448.1	665	Daucus carota	common cis-acting element in promoter and enhancer regions	Common	Common
CsSAUR11	CSS0002448.1	669	Nicotiana glutinosa		NA	NA
CsSAUR11	CSS0002448.1	742	Nicotiana glutinosa		NA	NA
CsSAUR11	CSS0002448.1	754	Nicotiana glutinosa		NA	NA
CsSAUR11	CSS0002448.1	800	Pisum sativum	common cis-acting element in promoter and enhancer regions	Common	Common
CsSAUR11	CSS0002448.1	812	Nicotiana glutinosa		NA	NA
CsSAUR11	CSS0002448.1	863	Pisum sativum	common cis-acting element in promoter and enhancer regions	Common	Common
CsSAUR11	CSS0002448.1	893	Nicotiana glutinosa		NA	NA
CsSAUR11	CSS0002448.1	937	Nicotiana glutinosa		NA	NA
CsSAUR11	CSS0002448.1	950	Nicotiana glutinosa		NA	NA
CsSAUR11	CSS0002448.1	973	Nicotiana glutinosa		NA	NA
CsSAUR11	CSS0002448.1	986	Nicotiana glutinosa		NA	NA
CsSAUR11	CSS0002448.1	1008	Nicotiana glutinosa		NA	NA
CsSAUR11	CSS0002448.1	1031	Nicotiana glutinosa		NA	NA
CsSAUR11	CSS0002448.1	1040	Nicotiana glutinosa		NA	NA
CsSAUR11	CSS0002448.1	1060	Nicotiana glutinosa		NA	NA
CsSAUR11	CSS0002448.1	1072	Nicotiana glutinosa		NA	NA
CsSAUR11	CSS0002448.1	1124	Pisum sativum	common cis-acting element in promoter and enhancer regions	Common	Common
CsSAUR11	CSS0002448.1	1241	Pisum sativum	common cis-acting element in promoter and enhancer regions	Common	Common
CsSAUR11	CSS0002448.1	1272	Arabidopsis thaliana	common cis-acting element in promoter and enhancer regions	Common	Common
CsSAUR11	CSS0002448.1	1273	Nicotiana glutinosa		NA	NA
CsSAUR11	CSS0002448.1	1294	Pisum sativum	common cis-acting element in promoter and enhancer regions	Common	Common
CsSAUR11	CSS0002448.1	1347	Nicotiana glutinosa		NA	NA
CsSAUR11	CSS0002448.1	1373	Arabidopsis thaliana	common cis-acting element in promoter and enhancer regions	Common	Common
CsSAUR11	CSS0002448.1	1374	Nicotiana glutinosa		NA	NA
CsSAUR11	CSS0002448.1	1412	Nicotiana glutinosa		NA	NA
CsSAUR11	CSS0002448.1	1421	Nicotiana glutinosa		NA	NA
CsSAUR11	CSS0002448.1	1433	Nicotiana glutinosa		NA	NA
CsSAUR11	CSS0002448.1	1483	Nicotiana glutinosa		NA	NA
CsSAUR11	CSS0002448.1	1545	Nicotiana glutinosa		NA	NA
CsSAUR11	CSS0002448.1	1554	Pisum sativum	common cis-acting element in promoter and enhancer regions	Common	Common
CsSAUR11	CSS0002448.1	1604	Pisum sativum	common cis-acting element in promoter and enhancer regions	Common	Common
CsSAUR11	CSS0002448.1	1662	Pisum sativum	common cis-acting element in promoter and enhancer regions	Common	Common
CsSAUR11	CSS0002448.1	1665	Pisum sativum	common cis-acting element in promoter and enhancer regions	Common	Common
CsSAUR11	CSS0002448.1	1795	Nicotiana glutinosa		NA	NA
CsSAUR11	CSS0002448.1	1800	Pisum sativum	common cis-acting element in promoter and enhancer regions	Common	Common
CsSAUR11	CSS0002448.1	1833	Nicotiana glutinosa		NA	NA
CsSAUR11	CSS0002448.1	1868	Nicotiana glutinosa		NA	NA
CsSAUR11	CSS0002448.1	1870	Nicotiana glutinosa		NA	NA
CsSAUR11	CSS0002448.1	143	Brassica napus	core promoter element around -30 of transcription start	Common	Common
CsSAUR11	CSS0002448.1	144	Arabidopsis thaliana	core promoter element around -30 of transcription start	Common	Common
CsSAUR11	CSS0002448.1	145	Arabidopsis thaliana	core promoter element around -30 of transcription start	Common	Common
CsSAUR11	CSS0002448.1	146	Brassica napus	core promoter element around -30 of transcription start	Common	Common
CsSAUR11	CSS0002448.1	147	Arabidopsis thaliana	core promoter element around -30 of transcription start	Common	Common
CsSAUR11	CSS0002448.1	156	Arabidopsis thaliana	core promoter element around -30 of transcription start	Common	Common
CsSAUR11	CSS0002448.1	230	Helianthus annuus	core promoter element around -30 of transcription start	Common	Common
CsSAUR11	CSS0002448.1	232	Arabidopsis thaliana	core promoter element around -30 of transcription start	Common	Common
CsSAUR11	CSS0002448.1	514	Helianthus annuus	core promoter element around -30 of transcription start	Common	Common
CsSAUR11	CSS0002448.1	516	Arabidopsis thaliana	core promoter element around -30 of transcription start	Common	Common
CsSAUR11	CSS0002448.1	534	Oryza sativa	core promoter element around -30 of transcription start	Common	Common
CsSAUR11	CSS0002448.1	637	Oryza sativa	core promoter element around -30 of transcription start	Common	Common
CsSAUR11	CSS0002448.1	1047	Arabidopsis thaliana	core promoter element around -30 of transcription start	Common	Common
CsSAUR11	CSS0002448.1	1048	Arabidopsis thaliana	core promoter element around -30 of transcription start	Common	Common
CsSAUR11	CSS0002448.1	1117	Brassica napus	core promoter element around -30 of transcription start	Common	Common
CsSAUR11	CSS0002448.1	1118	Arabidopsis thaliana	core promoter element around -30 of transcription start	Common	Common
CsSAUR11	CSS0002448.1	1120	Arabidopsis thaliana	core promoter element around -30 of transcription start	Common	Common
CsSAUR11	CSS0002448.1	1549	Arabidopsis thaliana	core promoter element around -30 of transcription start	Common	Common
CsSAUR11	CSS0002448.1	1550	Arabidopsis thaliana	core promoter element around -30 of transcription start	Common	Common
CsSAUR11	CSS0002448.1	1570	Brassica napus	core promoter element around -30 of transcription start	Common	Common
CsSAUR11	CSS0002448.1	1571	Arabidopsis thaliana	core promoter element around -30 of transcription start	Common	Common
CsSAUR11	CSS0002448.1	1902	Arabidopsis thaliana	core promoter element around -30 of transcription start	Common	Common
CsSAUR11	CSS0002448.1	1903	Arabidopsis thaliana	core promoter element around -30 of transcription start	Common	Common
CsSAUR11	CSS0002448.1	1904	Brassica napus	core promoter element around -30 of transcription start	Common	Common
CsSAUR11	CSS0002448.1	1905	Arabidopsis thaliana	core promoter element around -30 of transcription start	Common	Common
CsSAUR11	CSS0002448.1	1906	Brassica napus	core promoter element around -30 of transcription start	Common	Common
CsSAUR11	CSS0002448.1	1907	Arabidopsis thaliana	core promoter element around -30 of transcription start	Common	Common
CsSAUR11	CSS0002448.1	1908	Brassica napus	core promoter element around -30 of transcription start	Common	Common
CsSAUR11	CSS0002448.1	1909	Arabidopsis thaliana	core promoter element around -30 of transcription start	Common	Common
CsSAUR11	CSS0002448.1	1910	Brassica napus	core promoter element around -30 of transcription start	Common	Common
CsSAUR11	CSS0002448.1	1911	Arabidopsis thaliana	core promoter element around -30 of transcription start	Common	Common
CsSAUR11	CSS0002448.1	1912	Brassica napus	core promoter element around -30 of transcription start	Common	Common
CsSAUR11	CSS0002448.1	1913	Arabidopsis thaliana	core promoter element around -30 of transcription start	Common	Common
CsSAUR11	CSS0002448.1	1914	Brassica napus	core promoter element around -30 of transcription start	Common	Common
CsSAUR11	CSS0002448.1	1915	Arabidopsis thaliana	core promoter element around -30 of transcription start	Common	Common
CsSAUR11	CSS0002448.1	210	Oryza sativa	cis-acting element involved in gibberellin-responsiveness	Phytohormone	gibberellin
CsSAUR11	CSS0002448.1	804	Oryza sativa	cis-acting element involved in gibberellin-responsiveness	Phytohormone	gibberellin
CsSAUR11	CSS0002448.1	113	organism	short_function	Common	Common
CsSAUR11	CSS0002448.1	119	organism	short_function	Common	Common
CsSAUR11	CSS0002448.1	501	organism	short_function	Common	Common
CsSAUR11	CSS0002448.1	561	organism	short_function	Common	Common
CsSAUR11	CSS0002448.1	1017	organism	short_function	Common	Common
CsSAUR11	CSS0002448.1	1181	organism	short_function	Common	Common
CsSAUR11	CSS0002448.1	1199	organism	short_function	Common	Common
CsSAUR11	CSS0002448.1	1201	organism	short_function	Common	Common
CsSAUR11	CSS0002448.1	1342	organism	short_function	Common	Common
CsSAUR11	CSS0002448.1	1521	organism	short_function	Common	Common
CsSAUR11	CSS0002448.1	1918	organism	short_function	Common	Common
CsSAUR11	CSS0002448.1	1959	organism	short_function	Common	Common
CsSAUR11	CSS0002448.1	151	Arabidopsis thaliana	part of a light responsive element	Environment	Light
CsSAUR11	CSS0002448.1	242	Arabidopsis thaliana	part of a light responsive element	Environment	Light
CsSAUR11	CSS0002448.1	850	Zea mays	cis-acting regulatory element essential for the anaerobic induction	Environment	Anaerobic
CsSAUR11	CSS0002448.1	1717	Zea mays	cis-acting regulatory element essential for the anaerobic induction	Environment	Anaerobic
CsSAUR11	CSS0002448.1	671	Nicotiana glutinos		NA	NA
CsSAUR11	CSS0002448.1	992	Arabidopsis thaliana		NA	NA
CsSAUR11	CSS0002448.1	1350	Arabidopsis thaliana		NA	NA
CsSAUR11	CSS0002448.1	1875	Arabidopsis thaliana		NA	NA
CsSAUR11	CSS0002448.1	1960	Spinacia oleracea	part of a light responsive element	Environment	Light
CsSAUR11	CSS0002448.1	121	Petroselinum hortense		NA	NA
CsSAUR11	CSS0002448.1	905	Petroselinum hortense		NA	NA
CsSAUR11	CSS0002448.1	1167	Petroselinum hortense		NA	NA
CsSAUR11	CSS0002448.1	1279	Petroselinum hortense		NA	NA
CsSAUR11	CSS0002448.1	1813	Petroselinum hortense		NA	NA
CsSAUR11	CSS0002448.1	1961	Petroselinum hortense		NA	NA
CsSAUR11	CSS0002448.1	523	Arabidopsis thaliana	light responsive element	Environment	Light
CsSAUR11	CSS0002448.1	1980	Solanum tuberosum	light responsive element	Environment	Light
CsSAUR11	CSS0002448.1	846	Arabidopsis thaliana		NA	NA
CsSAUR11	CSS0002448.1	1044	Arabidopsis thaliana		NA	NA
CsSAUR11	CSS0002448.1	1587	Petroselinum crispum	part of a conserved DNA module involved in light responsiveness	Environment	Light
CsSAUR11	CSS0002448.1	1591	Petroselinum crispum	part of a conserved DNA module involved in light responsiveness	Environment	Light
CsSAUR11	CSS0002448.1	1595	Petroselinum crispum	part of a conserved DNA module involved in light responsiveness	Environment	Light
CsSAUR11	CSS0002448.1	1645	Petroselinum crispum	part of a conserved DNA module involved in light responsiveness	Environment	Light
CsSAUR11	CSS0002448.1	568	Avena sativa		NA	NA
CsSAUR11	CSS0002448.1	1596	Glycine max	60K protein binding site	Common	Common
CsSAUR11	CSS0002448.1	1780	Daucus carota	part of a light responsive element	Environment	Light
CsSAUR11	CSS0002448.1	145	Arabidopsis thaliana		NA	NA
CsSAUR11	CSS0002448.1	1118	Arabidopsis thaliana		NA	NA
CsSAUR11	CSS0002448.1	1903	Arabidopsis thaliana		NA	NA
CsSAUR11	CSS0002448.1	1905	Arabidopsis thaliana		NA	NA
CsSAUR11	CSS0002448.1	1907	Arabidopsis thaliana		NA	NA
CsSAUR11	CSS0002448.1	1909	Arabidopsis thaliana		NA	NA
CsSAUR11	CSS0002448.1	1911	Arabidopsis thaliana		NA	NA
CsSAUR11	CSS0002448.1	1913	Arabidopsis thaliana		NA	NA
CsSAUR11	CSS0002448.1	1984	Arabidopsis thaliana		NA	NA
CsSAUR11	CSS0002448.1	544	Nicotiana glutinosa		NA	NA
CsSAUR11	CSS0002448.1	545	Nicotiana glutinosa		NA	NA
CsSAUR11	CSS0002448.1	1506	Arabidopsis thaliana	part of a light responsive element	Environment	Light
CsSAUR11	CSS0002448.1	61	Arabidopsis thaliana	protein binding site	Common	Common
CsSAUR14	CSS0002906.1	722	Arabidopsis thaliana		NA	NA
CsSAUR14	CSS0002906.1	96	Arabidopsis thaliana	light responsive element	Environment	Light
CsSAUR14	CSS0002906.1	252	Arabidopsis thaliana		NA	NA
CsSAUR14	CSS0002906.1	1766	Pisum sativum		NA	NA
CsSAUR14	CSS0002906.1	97	Arabidopsis thaliana		NA	NA
CsSAUR14	CSS0002906.1	872	Arabidopsis thaliana		NA	NA
CsSAUR14	CSS0002906.1	1009	Arabidopsis thaliana		NA	NA
CsSAUR14	CSS0002906.1	1312	Arabidopsis thaliana		NA	NA
CsSAUR14	CSS0002906.1	1475	Arabidopsis thaliana		NA	NA
CsSAUR14	CSS0002906.1	1683	Arabidopsis thaliana		NA	NA
CsSAUR14	CSS0002906.1	1793	Arabidopsis thaliana		NA	NA
CsSAUR14	CSS0002906.1	1900	Arabidopsis thaliana		NA	NA
CsSAUR14	CSS0002906.1	152	Petroselinum hortense		NA	NA
CsSAUR14	CSS0002906.1	317	Petroselinum hortense		NA	NA
CsSAUR14	CSS0002906.1	478	Petroselinum hortense		NA	NA
CsSAUR14	CSS0002906.1	482	Petroselinum hortense		NA	NA
CsSAUR14	CSS0002906.1	485	Petroselinum hortense		NA	NA
CsSAUR14	CSS0002906.1	629	Petroselinum hortense		NA	NA
CsSAUR14	CSS0002906.1	755	Petroselinum hortense		NA	NA
CsSAUR14	CSS0002906.1	795	Petroselinum hortense		NA	NA
CsSAUR14	CSS0002906.1	798	Petroselinum hortense		NA	NA
CsSAUR14	CSS0002906.1	1070	Petroselinum hortense		NA	NA
CsSAUR14	CSS0002906.1	1418	Petroselinum hortense		NA	NA
CsSAUR14	CSS0002906.1	1529	Petroselinum hortense		NA	NA
CsSAUR14	CSS0002906.1	1601	Petroselinum hortense		NA	NA
CsSAUR14	CSS0002906.1	1417	Spinacia oleracea	part of a light responsive element	Environment	Light
CsSAUR14	CSS0002906.1	975	Arabidopsis thaliana	part of a light responsive element	Environment	Light
CsSAUR14	CSS0002906.1	879	Arabidopsis thaliana		NA	NA
CsSAUR14	CSS0002906.1	1217	Arabidopsis thaliana		NA	NA
CsSAUR14	CSS0002906.1	1514	Arabidopsis thaliana		NA	NA
CsSAUR14	CSS0002906.1	1894	Arabidopsis thaliana		NA	NA
CsSAUR14	CSS0002906.1	1896	Arabidopsis thaliana		NA	NA
CsSAUR14	CSS0002906.1	1177	Arabidopsis thaliana		NA	NA
CsSAUR14	CSS0002906.1	353	Oryza sativa	gibberellin-responsive element	Phytohormone	Gibberellin
CsSAUR14	CSS0002906.1	624	Oryza sativa	gibberellin-responsive element	Phytohormone	Gibberellin
CsSAUR14	CSS0002906.1	722	Hordeum vulgare	cis-acting regulatory element involved in the MeJA-responsiveness	Environment	MeJA
CsSAUR14	CSS0002906.1	828	Hordeum vulgare	cis-acting element involved in low-temperature responsiveness	Environment	Low-temperature
CsSAUR14	CSS0002906.1	754	Oryza sativa	involved in endosperm-specific negative expression	Tissue	Endosperm
CsSAUR14	CSS0002906.1	427	Pisum sativum	part of a light responsive element	Environment	Light
CsSAUR14	CSS0002906.1	1683	Nicotiana tabacum		NA	NA
CsSAUR14	CSS0002906.1	722	Hordeum vulgare	cis-acting regulatory element involved in the MeJA-responsiveness	Environment	MeJA
CsSAUR14	CSS0002906.1	823	Zea mays	part of a light responsive element	Environment	Light
CsSAUR14	CSS0002906.1	97	Arabidopsis thaliana		NA	NA
CsSAUR14	CSS0002906.1	872	Arabidopsis thaliana		NA	NA
CsSAUR14	CSS0002906.1	1009	Arabidopsis thaliana		NA	NA
CsSAUR14	CSS0002906.1	1793	Arabidopsis thaliana		NA	NA
CsSAUR14	CSS0002906.1	1900	Arabidopsis thaliana		NA	NA
CsSAUR14	CSS0002906.1	88	Nicotiana glutinosa		NA	NA
CsSAUR14	CSS0002906.1	119	Pisum sativum	common cis-acting element in promoter and enhancer regions	Common	Common
CsSAUR14	CSS0002906.1	235	Nicotiana glutinosa		NA	NA
CsSAUR14	CSS0002906.1	241	Pisum sativum	common cis-acting element in promoter and enhancer regions	Common	Common
CsSAUR14	CSS0002906.1	278	Pisum sativum	common cis-acting element in promoter and enhancer regions	Common	Common
CsSAUR14	CSS0002906.1	382	Nicotiana glutinosa		NA	NA
CsSAUR14	CSS0002906.1	448	Nicotiana glutinosa		NA	NA
CsSAUR14	CSS0002906.1	471	Arabidopsis thaliana	common cis-acting element in promoter and enhancer regions	Common	Common
CsSAUR14	CSS0002906.1	472	Nicotiana glutinosa		NA	NA
CsSAUR14	CSS0002906.1	720	Nicotiana glutinosa		NA	NA
CsSAUR14	CSS0002906.1	728	Nicotiana glutinosa		NA	NA
CsSAUR14	CSS0002906.1	785	Arabidopsis thaliana	common cis-acting element in promoter and enhancer regions	Common	Common
CsSAUR14	CSS0002906.1	786	Nicotiana glutinosa		NA	NA
CsSAUR14	CSS0002906.1	1100	Nicotiana glutinosa		NA	NA
CsSAUR14	CSS0002906.1	1117	Nicotiana glutinosa		NA	NA
CsSAUR14	CSS0002906.1	1155	Nicotiana glutinosa		NA	NA
CsSAUR14	CSS0002906.1	1202	Nicotiana glutinosa		NA	NA
CsSAUR14	CSS0002906.1	1261	Nicotiana glutinosa		NA	NA
CsSAUR14	CSS0002906.1	1269	Pisum sativum	common cis-acting element in promoter and enhancer regions	Common	Common
CsSAUR14	CSS0002906.1	1380	Pisum sativum	common cis-acting element in promoter and enhancer regions	Common	Common
CsSAUR14	CSS0002906.1	1445	Pisum sativum	common cis-acting element in promoter and enhancer regions	Common	Common
CsSAUR14	CSS0002906.1	1461	Nicotiana glutinosa		NA	NA
CsSAUR14	CSS0002906.1	1478	Arabidopsis thaliana	common cis-acting element in promoter and enhancer regions	Common	Common
CsSAUR14	CSS0002906.1	1479	Nicotiana glutinosa		NA	NA
CsSAUR14	CSS0002906.1	1488	Nicotiana glutinosa		NA	NA
CsSAUR14	CSS0002906.1	1497	Nicotiana glutinosa		NA	NA
CsSAUR14	CSS0002906.1	1505	Nicotiana glutinosa		NA	NA
CsSAUR14	CSS0002906.1	1507	Arabidopsis thaliana	common cis-acting element in promoter and enhancer regions	Common	Common
CsSAUR14	CSS0002906.1	1711	Pisum sativum	common cis-acting element in promoter and enhancer regions	Common	Common
CsSAUR14	CSS0002906.1	1722	Pisum sativum	common cis-acting element in promoter and enhancer regions	Common	Common
CsSAUR14	CSS0002906.1	1782	Nicotiana glutinosa		NA	NA
CsSAUR14	CSS0002906.1	1970	Nicotiana glutinosa		NA	NA
CsSAUR14	CSS0002906.1	1987	Nicotiana glutinosa		NA	NA
CsSAUR14	CSS0002906.1	118	Arabidopsis thaliana		NA	NA
CsSAUR14	CSS0002906.1	241	Arabidopsis thaliana		NA	NA
CsSAUR14	CSS0002906.1	268	Arabidopsis thaliana		NA	NA
CsSAUR14	CSS0002906.1	1268	Arabidopsis thaliana		NA	NA
CsSAUR14	CSS0002906.1	1352	Arabidopsis thaliana		NA	NA
CsSAUR14	CSS0002906.1	1505	Arabidopsis thaliana		NA	NA
CsSAUR14	CSS0002906.1	1721	Arabidopsis thaliana		NA	NA
CsSAUR14	CSS0002906.1	1844	Arabidopsis thaliana		NA	NA
CsSAUR14	CSS0002906.1	65	Brassica napus	core promoter element around -30 of transcription start	Common	Common
CsSAUR14	CSS0002906.1	66	Arabidopsis thaliana	core promoter element around -30 of transcription start	Common	Common
CsSAUR14	CSS0002906.1	67	Arabidopsis thaliana	core promoter element around -30 of transcription start	Common	Common
CsSAUR14	CSS0002906.1	77	Oryza sativa	core promoter element around -30 of transcription start	Common	Common
CsSAUR14	CSS0002906.1	343	Helianthus annuus	core promoter element around -30 of transcription start	Common	Common
CsSAUR14	CSS0002906.1	345	Arabidopsis thaliana	core promoter element around -30 of transcription start	Common	Common
CsSAUR14	CSS0002906.1	355	Oryza sativa	core promoter element around -30 of transcription start	Common	Common
CsSAUR14	CSS0002906.1	879	Arabidopsis thaliana	core promoter element around -30 of transcription start	Common	Common
CsSAUR14	CSS0002906.1	881	Arabidopsis thaliana	core promoter element around -30 of transcription start	Common	Common
CsSAUR14	CSS0002906.1	895	Arabidopsis thaliana	core promoter element around -30 of transcription start	Common	Common
CsSAUR14	CSS0002906.1	1186	Helianthus annuus	core promoter element around -30 of transcription start	Common	Common
CsSAUR14	CSS0002906.1	1188	Arabidopsis thaliana	core promoter element around -30 of transcription start	Common	Common
CsSAUR14	CSS0002906.1	1212	Oryza sativa	core promoter element around -30 of transcription start	Common	Common
CsSAUR14	CSS0002906.1	1215	Helianthus annuus	core promoter element around -30 of transcription start	Common	Common
CsSAUR14	CSS0002906.1	1217	Arabidopsis thaliana	core promoter element around -30 of transcription start	Common	Common
CsSAUR14	CSS0002906.1	1218	Brassica napus	core promoter element around -30 of transcription start	Common	Common
CsSAUR14	CSS0002906.1	1219	Arabidopsis thaliana	core promoter element around -30 of transcription start	Common	Common
CsSAUR14	CSS0002906.1	1285	Arabidopsis thaliana	core promoter element around -30 of transcription start	Common	Common
CsSAUR14	CSS0002906.1	1484	Brassica napus	core promoter element around -30 of transcription start	Common	Common
CsSAUR14	CSS0002906.1	1485	Arabidopsis thaliana	core promoter element around -30 of transcription start	Common	Common
CsSAUR14	CSS0002906.1	1514	Arabidopsis thaliana	core promoter element around -30 of transcription start	Common	Common
CsSAUR14	CSS0002906.1	1515	Brassica oleracea	core promoter element around -30 of transcription start	Common	Common
CsSAUR14	CSS0002906.1	1516	Arabidopsis thaliana	core promoter element around -30 of transcription start	Common	Common
CsSAUR14	CSS0002906.1	1590	Arabidopsis thaliana	core promoter element around -30 of transcription start	Common	Common
CsSAUR14	CSS0002906.1	1592	Oryza sativa	core promoter element around -30 of transcription start	Common	Common
CsSAUR14	CSS0002906.1	1669	Oryza sativa	core promoter element around -30 of transcription start	Common	Common
CsSAUR14	CSS0002906.1	1893	Brassica napus	core promoter element around -30 of transcription start	Common	Common
CsSAUR14	CSS0002906.1	1894	Arabidopsis thaliana	core promoter element around -30 of transcription start	Common	Common
CsSAUR14	CSS0002906.1	1895	Brassica napus	core promoter element around -30 of transcription start	Common	Common
CsSAUR14	CSS0002906.1	1896	Arabidopsis thaliana	core promoter element around -30 of transcription start	Common	Common
CsSAUR14	CSS0002906.1	1897	Brassica oleracea	core promoter element around -30 of transcription start	Common	Common
CsSAUR14	CSS0002906.1	1898	Arabidopsis thaliana	core promoter element around -30 of transcription start	Common	Common
CsSAUR14	CSS0002906.1	1966	Brassica napus	core promoter element around -30 of transcription start	Common	Common
CsSAUR14	CSS0002906.1	1967	Arabidopsis thaliana	core promoter element around -30 of transcription start	Common	Common
CsSAUR14	CSS0002906.1	252	Arabidopsis thaliana	MYB binding site involved in drought-inducibility	TF	MYB Binding Site
CsSAUR14	CSS0002906.1	1053	Avena sativa		NA	NA
CsSAUR14	CSS0002906.1	1232	Zea mays	cis-acting regulatory element essential for the anaerobic induction	Environment	Anaerobic
CsSAUR14	CSS0002906.1	1806	Zea mays	cis-acting regulatory element essential for the anaerobic induction	Environment	Anaerobic
CsSAUR14	CSS0002906.1	1820	Zea mays	cis-acting regulatory element essential for the anaerobic induction	Environment	Anaerobic
CsSAUR14	CSS0002906.1	109	organism	short_function	Common	Common
CsSAUR14	CSS0002906.1	144	organism	short_function	Common	Common
CsSAUR14	CSS0002906.1	281	organism	short_function	Common	Common
CsSAUR14	CSS0002906.1	444	organism	short_function	Common	Common
CsSAUR14	CSS0002906.1	704	organism	short_function	Common	Common
CsSAUR14	CSS0002906.1	817	organism	short_function	Common	Common
CsSAUR14	CSS0002906.1	937	organism	short_function	Common	Common
CsSAUR14	CSS0002906.1	1017	organism	short_function	Common	Common
CsSAUR14	CSS0002906.1	1147	organism	short_function	Common	Common
CsSAUR14	CSS0002906.1	1353	organism	short_function	Common	Common
CsSAUR14	CSS0002906.1	1434	organism	short_function	Common	Common
CsSAUR14	CSS0002906.1	1761	organism	short_function	Common	Common
CsSAUR14	CSS0002906.1	1774	organism	short_function	Common	Common
CsSAUR14	CSS0002906.1	1931	organism	short_function	Common	Common
CsSAUR14	CSS0002906.1	1699	Arabidopsis thaliana	part of a light responsive element	Environment	Light
CsSAUR14	CSS0002906.1	698	Pisum sativum	part of a light responsive element	Environment	Light
CsSAUR14	CSS0002906.1	803	Oryza sativa	cis-acting element involved in gibberellin-responsiveness	Phytohormone	gibberellin
CsSAUR14	CSS0002906.1	107	Pisum sativum		NA	NA
CsSAUR14	CSS0002906.1	361	Pisum sativum		NA	NA
CsSAUR44	CSS0003919.1	244	organism	short_function	Common	Common
CsSAUR44	CSS0003919.1	818	organism	short_function	Common	Common
CsSAUR44	CSS0003919.1	906	organism	short_function	Common	Common
CsSAUR44	CSS0003919.1	963	organism	short_function	Common	Common
CsSAUR44	CSS0003919.1	1600	organism	short_function	Common	Common
CsSAUR44	CSS0003919.1	1875	organism	short_function	Common	Common
CsSAUR44	CSS0003919.1	1881	organism	short_function	Common	Common
CsSAUR44	CSS0003919.1	1987	organism	short_function	Common	Common
CsSAUR44	CSS0003919.1	1021	Zea mays	cis-acting regulatory element essential for the anaerobic induction	Environment	Anaerobic
CsSAUR44	CSS0003919.1	1091	Zea mays	cis-acting regulatory element essential for the anaerobic induction	Environment	Anaerobic
CsSAUR44	CSS0003919.1	1285	Zea mays	cis-acting regulatory element essential for the anaerobic induction	Environment	Anaerobic
CsSAUR44	CSS0003919.1	1659	Zea mays	cis-acting regulatory element essential for the anaerobic induction	Environment	Anaerobic
CsSAUR44	CSS0003919.1	217	Petroselinum crispum	cis-acting regulatory element	Common	Common
CsSAUR44	CSS0003919.1	1625	Solanum tuberosum	part of a light responsive element	Environment	Light
CsSAUR44	CSS0003919.1	345	Nicotiana tabacum	cis-acting element involved in salicylic acid responsiveness	Phytohormone	Salicylic acid
CsSAUR44	CSS0003919.1	59	Arabidopsis thaliana	core promoter element around -30 of transcription start	Common	Common
CsSAUR44	CSS0003919.1	125	Arabidopsis thaliana	core promoter element around -30 of transcription start	Common	Common
CsSAUR44	CSS0003919.1	140	Arabidopsis thaliana	core promoter element around -30 of transcription start	Common	Common
CsSAUR44	CSS0003919.1	433	Oryza sativa	core promoter element around -30 of transcription start	Common	Common
CsSAUR44	CSS0003919.1	486	Arabidopsis thaliana	core promoter element around -30 of transcription start	Common	Common
CsSAUR44	CSS0003919.1	538	Brassica oleracea	core promoter element around -30 of transcription start	Common	Common
CsSAUR44	CSS0003919.1	539	Arabidopsis thaliana	core promoter element around -30 of transcription start	Common	Common
CsSAUR44	CSS0003919.1	578	Brassica napus	core promoter element around -30 of transcription start	Common	Common
CsSAUR44	CSS0003919.1	579	Arabidopsis thaliana	core promoter element around -30 of transcription start	Common	Common
CsSAUR44	CSS0003919.1	580	Arabidopsis thaliana	core promoter element around -30 of transcription start	Common	Common
CsSAUR44	CSS0003919.1	592	Helianthus annuus	core promoter element around -30 of transcription start	Common	Common
CsSAUR44	CSS0003919.1	593	Arabidopsis thaliana	core promoter element around -30 of transcription start	Common	Common
CsSAUR44	CSS0003919.1	594	Arabidopsis thaliana	core promoter element around -30 of transcription start	Common	Common
CsSAUR44	CSS0003919.1	607	Arabidopsis thaliana	core promoter element around -30 of transcription start	Common	Common
CsSAUR44	CSS0003919.1	608	Arabidopsis thaliana	core promoter element around -30 of transcription start	Common	Common
CsSAUR44	CSS0003919.1	614	Arabidopsis thaliana	core promoter element around -30 of transcription start	Common	Common
CsSAUR44	CSS0003919.1	653	Oryza sativa	core promoter element around -30 of transcription start	Common	Common
CsSAUR44	CSS0003919.1	657	Helianthus annuus	core promoter element around -30 of transcription start	Common	Common
CsSAUR44	CSS0003919.1	659	Arabidopsis thaliana	core promoter element around -30 of transcription start	Common	Common
CsSAUR44	CSS0003919.1	715	Brassica napus	core promoter element around -30 of transcription start	Common	Common
CsSAUR44	CSS0003919.1	716	Arabidopsis thaliana	core promoter element around -30 of transcription start	Common	Common
CsSAUR44	CSS0003919.1	717	Arabidopsis thaliana	core promoter element around -30 of transcription start	Common	Common
CsSAUR44	CSS0003919.1	885	Helianthus annuus	core promoter element around -30 of transcription start	Common	Common
CsSAUR44	CSS0003919.1	886	Arabidopsis thaliana	core promoter element around -30 of transcription start	Common	Common
CsSAUR44	CSS0003919.1	887	Arabidopsis thaliana	core promoter element around -30 of transcription start	Common	Common
CsSAUR44	CSS0003919.1	890	Brassica napus	core promoter element around -30 of transcription start	Common	Common
CsSAUR44	CSS0003919.1	891	Arabidopsis thaliana	core promoter element around -30 of transcription start	Common	Common
CsSAUR44	CSS0003919.1	892	Arabidopsis thaliana	core promoter element around -30 of transcription start	Common	Common
CsSAUR44	CSS0003919.1	914	Helianthus annuus	core promoter element around -30 of transcription start	Common	Common
CsSAUR44	CSS0003919.1	916	Arabidopsis thaliana	core promoter element around -30 of transcription start	Common	Common
CsSAUR44	CSS0003919.1	918	Oryza sativa	core promoter element around -30 of transcription start	Common	Common
CsSAUR44	CSS0003919.1	953	Arabidopsis thaliana	core promoter element around -30 of transcription start	Common	Common
CsSAUR44	CSS0003919.1	974	Arabidopsis thaliana	core promoter element around -30 of transcription start	Common	Common
CsSAUR44	CSS0003919.1	976	Arabidopsis thaliana	core promoter element around -30 of transcription start	Common	Common
CsSAUR44	CSS0003919.1	994	Brassica oleracea	core promoter element around -30 of transcription start	Common	Common
CsSAUR44	CSS0003919.1	995	Arabidopsis thaliana	core promoter element around -30 of transcription start	Common	Common
CsSAUR44	CSS0003919.1	1281	Oryza sativa	core promoter element around -30 of transcription start	Common	Common
CsSAUR44	CSS0003919.1	1348	Arabidopsis thaliana	core promoter element around -30 of transcription start	Common	Common
CsSAUR44	CSS0003919.1	1349	Pisum sativum	core promoter element around -30 of transcription start	Common	Common
CsSAUR44	CSS0003919.1	1350	Helianthus annuus	core promoter element around -30 of transcription start	Common	Common
CsSAUR44	CSS0003919.1	1351	Arabidopsis thaliana	core promoter element around -30 of transcription start	Common	Common
CsSAUR44	CSS0003919.1	1352	Arabidopsis thaliana	core promoter element around -30 of transcription start	Common	Common
CsSAUR44	CSS0003919.1	1376	Pisum sativum	core promoter element around -30 of transcription start	Common	Common
CsSAUR44	CSS0003919.1	1377	Helianthus annuus	core promoter element around -30 of transcription start	Common	Common
CsSAUR44	CSS0003919.1	1378	Arabidopsis thaliana	core promoter element around -30 of transcription start	Common	Common
CsSAUR44	CSS0003919.1	1379	Arabidopsis thaliana	core promoter element around -30 of transcription start	Common	Common
CsSAUR44	CSS0003919.1	1513	Arabidopsis thaliana	core promoter element around -30 of transcription start	Common	Common
CsSAUR44	CSS0003919.1	1533	Pisum sativum	core promoter element around -30 of transcription start	Common	Common
CsSAUR44	CSS0003919.1	1534	Helianthus annuus	core promoter element around -30 of transcription start	Common	Common
CsSAUR44	CSS0003919.1	1535	Arabidopsis thaliana	core promoter element around -30 of transcription start	Common	Common
CsSAUR44	CSS0003919.1	1536	Arabidopsis thaliana	core promoter element around -30 of transcription start	Common	Common
CsSAUR44	CSS0003919.1	1775	Arabidopsis thaliana	core promoter element around -30 of transcription start	Common	Common
CsSAUR44	CSS0003919.1	1776	Arabidopsis thaliana	core promoter element around -30 of transcription start	Common	Common
CsSAUR44	CSS0003919.1	1820	Arabidopsis thaliana	core promoter element around -30 of transcription start	Common	Common
CsSAUR44	CSS0003919.1	1822	Arabidopsis thaliana	core promoter element around -30 of transcription start	Common	Common
CsSAUR44	CSS0003919.1	1863	Avena sativa	core promoter element around -30 of transcription start	Common	Common
CsSAUR44	CSS0003919.1	1865	Brassica napus	core promoter element around -30 of transcription start	Common	Common
CsSAUR44	CSS0003919.1	1866	Arabidopsis thaliana	core promoter element around -30 of transcription start	Common	Common
CsSAUR44	CSS0003919.1	1867	Brassica napus	core promoter element around -30 of transcription start	Common	Common
CsSAUR44	CSS0003919.1	1868	Arabidopsis thaliana	core promoter element around -30 of transcription start	Common	Common
CsSAUR44	CSS0003919.1	1869	Brassica napus	core promoter element around -30 of transcription start	Common	Common
CsSAUR44	CSS0003919.1	1870	Arabidopsis thaliana	core promoter element around -30 of transcription start	Common	Common
CsSAUR44	CSS0003919.1	1871	Brassica napus	core promoter element around -30 of transcription start	Common	Common
CsSAUR44	CSS0003919.1	1872	Arabidopsis thaliana	core promoter element around -30 of transcription start	Common	Common
CsSAUR44	CSS0003919.1	1949	Oryza sativa	core promoter element around -30 of transcription start	Common	Common
CsSAUR44	CSS0003919.1	554	Arabidopsis thaliana		NA	NA
CsSAUR44	CSS0003919.1	955	Arabidopsis thaliana		NA	NA
CsSAUR44	CSS0003919.1	1267	Arabidopsis thaliana		NA	NA
CsSAUR44	CSS0003919.1	82	Nicotiana glutinosa		NA	NA
CsSAUR44	CSS0003919.1	182	Arabidopsis thaliana	common cis-acting element in promoter and enhancer regions	Common	Common
CsSAUR44	CSS0003919.1	184	Arabidopsis thaliana	common cis-acting element in promoter and enhancer regions	Common	Common
CsSAUR44	CSS0003919.1	456	Arabidopsis thaliana	common cis-acting element in promoter and enhancer regions	Common	Common
CsSAUR44	CSS0003919.1	457	Nicotiana glutinosa		NA	NA
CsSAUR44	CSS0003919.1	475	Pisum sativum	common cis-acting element in promoter and enhancer regions	Common	Common
CsSAUR44	CSS0003919.1	507	Nicotiana glutinosa		NA	NA
CsSAUR44	CSS0003919.1	512	Nicotiana glutinosa		NA	NA
CsSAUR44	CSS0003919.1	521	Nicotiana glutinosa		NA	NA
CsSAUR44	CSS0003919.1	544	Nicotiana glutinosa		NA	NA
CsSAUR44	CSS0003919.1	585	Nicotiana glutinosa		NA	NA
CsSAUR44	CSS0003919.1	697	Pisum sativum	common cis-acting element in promoter and enhancer regions	Common	Common
CsSAUR44	CSS0003919.1	754	Nicotiana glutinosa		NA	NA
CsSAUR44	CSS0003919.1	764	Pisum sativum	common cis-acting element in promoter and enhancer regions	Common	Common
CsSAUR44	CSS0003919.1	807	Nicotiana glutinosa		NA	NA
CsSAUR44	CSS0003919.1	832	Nicotiana glutinosa		NA	NA
CsSAUR44	CSS0003919.1	851	Nicotiana glutinosa		NA	NA
CsSAUR44	CSS0003919.1	935	Nicotiana glutinosa		NA	NA
CsSAUR44	CSS0003919.1	967	Pisum sativum	common cis-acting element in promoter and enhancer regions	Common	Common
CsSAUR44	CSS0003919.1	1030	Arabidopsis thaliana	common cis-acting element in promoter and enhancer regions	Common	Common
CsSAUR44	CSS0003919.1	1372	Pisum sativum	common cis-acting element in promoter and enhancer regions	Common	Common
CsSAUR44	CSS0003919.1	1529	Nicotiana glutinosa		NA	NA
CsSAUR44	CSS0003919.1	1591	Nicotiana glutinosa		NA	NA
CsSAUR44	CSS0003919.1	1618	Nicotiana glutinosa		NA	NA
CsSAUR44	CSS0003919.1	1668	Nicotiana glutinosa		NA	NA
CsSAUR44	CSS0003919.1	1692	Pisum sativum	common cis-acting element in promoter and enhancer regions	Common	Common
CsSAUR44	CSS0003919.1	1700	Nicotiana glutinosa		NA	NA
CsSAUR44	CSS0003919.1	1708	Pisum sativum	common cis-acting element in promoter and enhancer regions	Common	Common
CsSAUR44	CSS0003919.1	1752	Pisum sativum	common cis-acting element in promoter and enhancer regions	Common	Common
CsSAUR44	CSS0003919.1	1790	Arabidopsis thaliana	common cis-acting element in promoter and enhancer regions	Common	Common
CsSAUR44	CSS0003919.1	1812	Pisum sativum	common cis-acting element in promoter and enhancer regions	Common	Common
CsSAUR44	CSS0003919.1	475	Arabidopsis thaliana		NA	NA
CsSAUR44	CSS0003919.1	966	Arabidopsis thaliana		NA	NA
CsSAUR44	CSS0003919.1	366	Arabidopsis thaliana	cis-acting regulatory element related to meristem expression	Tissue	Meristem
CsSAUR44	CSS0003919.1	217	Nicotiana tabacum		NA	NA
CsSAUR44	CSS0003919.1	852	Arabidopsis thaliana	part of a module for light response	Environment	Light
CsSAUR44	CSS0003919.1	969	Arabidopsis thaliana	part of a module for light response	Environment	Light
CsSAUR44	CSS0003919.1	787	Hordeum vulgare	cis-acting element involved in low-temperature responsiveness	Environment	Low-temperature
CsSAUR44	CSS0003919.1	1192	Arabidopsis thaliana	protein binding site	Common	Common
CsSAUR44	CSS0003919.1	260	Oryza sativa	gibberellin-responsive element	Phytohormone	Gibberellin
CsSAUR44	CSS0003919.1	1866	Arabidopsis thaliana		NA	NA
CsSAUR44	CSS0003919.1	1868	Arabidopsis thaliana		NA	NA
CsSAUR44	CSS0003919.1	1870	Arabidopsis thaliana		NA	NA
CsSAUR44	CSS0003919.1	798	Arabidopsis thaliana		NA	NA
CsSAUR44	CSS0003919.1	642	Arabidopsis thaliana	part of a light responsive element	Environment	Light
CsSAUR44	CSS0003919.1	1807	Arabidopsis thaliana	part of a light responsive element	Environment	Light
CsSAUR44	CSS0003919.1	217	Petroselinum hortense		NA	NA
CsSAUR44	CSS0003919.1	1776	Zea mays		NA	NA
CsSAUR44	CSS0003919.1	1868	Zea mays		NA	NA
CsSAUR44	CSS0003919.1	634	Petroselinum crispum	part of a conserved DNA module involved in light responsiveness	Environment	Light
CsSAUR44	CSS0003919.1	722	Petroselinum crispum	part of a conserved DNA module involved in light responsiveness	Environment	Light
CsSAUR44	CSS0003919.1	1337	Petroselinum crispum	part of a conserved DNA module involved in light responsiveness	Environment	Light
CsSAUR44	CSS0003919.1	1488	Petroselinum crispum	part of a conserved DNA module involved in light responsiveness	Environment	Light
CsSAUR44	CSS0003919.1	892	Arabidopsis thaliana		NA	NA
CsSAUR44	CSS0003919.1	1375	Arabidopsis thaliana		NA	NA
CsSAUR44	CSS0003919.1	824	Arabidopsis thaliana		NA	NA
CsSAUR44	CSS0003919.1	989	Avena sativa	light responsive element	Environment	Light
CsSAUR44	CSS0003919.1	982	Petunia hybrida	MYB binding site involved in flavonoid biosynthetic genes regulation	TF	MYB Binding Site
CsSAUR44	CSS0003919.1	1678	Petroselinum crispum	MYB binding site involved in light responsiveness	TF	MYB Binding Site
CsSAUR44	CSS0003919.1	233	Petroselinum hortense		NA	NA
CsSAUR44	CSS0003919.1	244	Petroselinum hortense		NA	NA
CsSAUR44	CSS0003919.1	793	Petroselinum hortense		NA	NA
CsSAUR44	CSS0003919.1	1030	Petroselinum hortense		NA	NA
CsSAUR44	CSS0003919.1	1629	Petroselinum hortense		NA	NA
CsSAUR44	CSS0003919.1	1640	Petroselinum hortense		NA	NA
CsSAUR44	CSS0003919.1	1877	Petroselinum hortense		NA	NA
CsSAUR44	CSS0003919.1	1883	Petroselinum hortense		NA	NA
CsSAUR44	CSS0003919.1	507	Arabidopsis thaliana	element involved in differentiation of the palisade mesophyll cells	Tissue	Palisade mesophyll cells
CsSAUR44	CSS0003919.1	554	Arabidopsis thaliana		NA	NA
CsSAUR44	CSS0003919.1	955	Arabidopsis thaliana		NA	NA
CsSAUR44	CSS0003919.1	1267	Arabidopsis thaliana		NA	NA
CsSAUR6	CSS0004454.1	918	Populus tremuloides		NA	NA
CsSAUR6	CSS0004454.1	101	Arabidopsis thaliana		NA	NA
CsSAUR6	CSS0004454.1	326	Arabidopsis thaliana		NA	NA
CsSAUR6	CSS0004454.1	813	Arabidopsis thaliana		NA	NA
CsSAUR6	CSS0004454.1	942	Arabidopsis thaliana		NA	NA
CsSAUR6	CSS0004454.1	1582	Nicotiana glutinos		NA	NA
CsSAUR6	CSS0004454.1	813	Brassica oleracea	gibberellin-responsive element	Phytohormone	Gibberellin
CsSAUR6	CSS0004454.1	1231	Zea mays		NA	NA
CsSAUR6	CSS0004454.1	581	Petroselinum hortense		NA	NA
CsSAUR6	CSS0004454.1	701	Petroselinum hortense		NA	NA
CsSAUR6	CSS0004454.1	1242	Petroselinum hortense		NA	NA
CsSAUR6	CSS0004454.1	1776	Petroselinum hortense		NA	NA
CsSAUR6	CSS0004454.1	1895	Petroselinum hortense		NA	NA
CsSAUR6	CSS0004454.1	1993	Petroselinum crispum	MYB binding site involved in light responsiveness	TF	MYB Binding Site
CsSAUR6	CSS0004454.1	883	Phaseolus vulgaris		NA	NA
CsSAUR6	CSS0004454.1	1894	Spinacia oleracea	part of a light responsive element	Environment	Light
CsSAUR6	CSS0004454.1	1231	Zea mays		NA	NA
CsSAUR6	CSS0004454.1	889	Pisum sativum		NA	NA
CsSAUR6	CSS0004454.1	1958	Pisum sativum		NA	NA
CsSAUR6	CSS0004454.1	813	Nicotiana tabacum		NA	NA
CsSAUR6	CSS0004454.1	649	Petroselinum crispum	part of a conserved DNA module involved in light responsiveness	Environment	Light
CsSAUR6	CSS0004454.1	1790	Petroselinum hortense		NA	NA
CsSAUR6	CSS0004454.1	624	Arabidopsis thaliana		NA	NA
CsSAUR6	CSS0004454.1	569	Arabidopsis thaliana		NA	NA
CsSAUR6	CSS0004454.1	786	Arabidopsis thaliana		NA	NA
CsSAUR6	CSS0004454.1	1503	Arabidopsis thaliana		NA	NA
CsSAUR6	CSS0004454.1	1505	Arabidopsis thaliana		NA	NA
CsSAUR6	CSS0004454.1	1507	Arabidopsis thaliana		NA	NA
CsSAUR6	CSS0004454.1	1509	Arabidopsis thaliana		NA	NA
CsSAUR6	CSS0004454.1	1511	Arabidopsis thaliana		NA	NA
CsSAUR6	CSS0004454.1	1513	Arabidopsis thaliana		NA	NA
CsSAUR6	CSS0004454.1	1515	Arabidopsis thaliana		NA	NA
CsSAUR6	CSS0004454.1	1517	Arabidopsis thaliana		NA	NA
CsSAUR6	CSS0004454.1	1624	Oryza sativa	gibberellin-responsive element	Phytohormone	Gibberellin
CsSAUR6	CSS0004454.1	996	Arabidopsis thaliana	protein binding site	Common	Common
CsSAUR6	CSS0004454.1	1416	Hordeum vulgare	cis-acting element involved in low-temperature responsiveness	Environment	Low-temperature
CsSAUR6	CSS0004454.1	1233	Zea mays		NA	NA
CsSAUR6	CSS0004454.1	1790	Nicotiana tabacum		NA	NA
CsSAUR6	CSS0004454.1	744	Petroselinum hortense		NA	NA
CsSAUR6	CSS0004454.1	81	Arabidopsis thaliana		NA	NA
CsSAUR6	CSS0004454.1	117	Arabidopsis thaliana		NA	NA
CsSAUR6	CSS0004454.1	189	Arabidopsis thaliana		NA	NA
CsSAUR6	CSS0004454.1	827	Arabidopsis thaliana		NA	NA
CsSAUR6	CSS0004454.1	1320	Arabidopsis thaliana		NA	NA
CsSAUR6	CSS0004454.1	1328	Arabidopsis thaliana		NA	NA
CsSAUR6	CSS0004454.1	8	Nicotiana glutinosa		NA	NA
CsSAUR6	CSS0004454.1	81	Pisum sativum	common cis-acting element in promoter and enhancer regions	Common	Common
CsSAUR6	CSS0004454.1	92	Pisum sativum	common cis-acting element in promoter and enhancer regions	Common	Common
CsSAUR6	CSS0004454.1	117	Nicotiana glutinosa		NA	NA
CsSAUR6	CSS0004454.1	119	Arabidopsis thaliana	common cis-acting element in promoter and enhancer regions	Common	Common
CsSAUR6	CSS0004454.1	155	Arabidopsis thaliana	common cis-acting element in promoter and enhancer regions	Common	Common
CsSAUR6	CSS0004454.1	189	Nicotiana glutinosa		NA	NA
CsSAUR6	CSS0004454.1	191	Arabidopsis thaliana	common cis-acting element in promoter and enhancer regions	Common	Common
CsSAUR6	CSS0004454.1	206	Pisum sativum	common cis-acting element in promoter and enhancer regions	Common	Common
CsSAUR6	CSS0004454.1	306	Pisum sativum	common cis-acting element in promoter and enhancer regions	Common	Common
CsSAUR6	CSS0004454.1	365	Nicotiana glutinosa		NA	NA
CsSAUR6	CSS0004454.1	395	Arabidopsis thaliana	common cis-acting element in promoter and enhancer regions	Common	Common
CsSAUR6	CSS0004454.1	441	Arabidopsis thaliana	common cis-acting element in promoter and enhancer regions	Common	Common
CsSAUR6	CSS0004454.1	442	Nicotiana glutinosa		NA	NA
CsSAUR6	CSS0004454.1	560	Nicotiana glutinosa		NA	NA
CsSAUR6	CSS0004454.1	695	Nicotiana glutinosa		NA	NA
CsSAUR6	CSS0004454.1	755	Pisum sativum	common cis-acting element in promoter and enhancer regions	Common	Common
CsSAUR6	CSS0004454.1	932	Nicotiana glutinosa		NA	NA
CsSAUR6	CSS0004454.1	1026	Pisum sativum	common cis-acting element in promoter and enhancer regions	Common	Common
CsSAUR6	CSS0004454.1	1037	Nicotiana glutinosa		NA	NA
CsSAUR6	CSS0004454.1	1043	Nicotiana glutinosa		NA	NA
CsSAUR6	CSS0004454.1	1060	Nicotiana glutinosa		NA	NA
CsSAUR6	CSS0004454.1	1062	Pisum sativum	common cis-acting element in promoter and enhancer regions	Common	Common
CsSAUR6	CSS0004454.1	1085	Nicotiana glutinosa		NA	NA
CsSAUR6	CSS0004454.1	1181	Pisum sativum	common cis-acting element in promoter and enhancer regions	Common	Common
CsSAUR6	CSS0004454.1	1320	Nicotiana glutinosa		NA	NA
CsSAUR6	CSS0004454.1	1322	Arabidopsis thaliana	common cis-acting element in promoter and enhancer regions	Common	Common
CsSAUR6	CSS0004454.1	1374	Pisum sativum	common cis-acting element in promoter and enhancer regions	Common	Common
CsSAUR6	CSS0004454.1	1384	Pisum sativum	common cis-acting element in promoter and enhancer regions	Common	Common
CsSAUR6	CSS0004454.1	1426	Nicotiana glutinosa		NA	NA
CsSAUR6	CSS0004454.1	1592	Pisum sativum	common cis-acting element in promoter and enhancer regions	Common	Common
CsSAUR6	CSS0004454.1	1611	Nicotiana glutinosa		NA	NA
CsSAUR6	CSS0004454.1	1667	Pisum sativum	common cis-acting element in promoter and enhancer regions	Common	Common
CsSAUR6	CSS0004454.1	1803	Arabidopsis thaliana	common cis-acting element in promoter and enhancer regions	Common	Common
CsSAUR6	CSS0004454.1	1885	Nicotiana glutinosa		NA	NA
CsSAUR6	CSS0004454.1	1231	Zea mays		NA	NA
CsSAUR6	CSS0004454.1	509	Daucus carota	core promoter element around -30 of transcription start	Common	Common
CsSAUR6	CSS0004454.1	510	Brassica juncea	core promoter element around -30 of transcription start	Common	Common
CsSAUR6	CSS0004454.1	511	Helianthus annuus	core promoter element around -30 of transcription start	Common	Common
CsSAUR6	CSS0004454.1	512	Arabidopsis thaliana	core promoter element around -30 of transcription start	Common	Common
CsSAUR6	CSS0004454.1	513	Arabidopsis thaliana	core promoter element around -30 of transcription start	Common	Common
CsSAUR6	CSS0004454.1	608	Brassica napus	core promoter element around -30 of transcription start	Common	Common
CsSAUR6	CSS0004454.1	609	Arabidopsis thaliana	core promoter element around -30 of transcription start	Common	Common
CsSAUR6	CSS0004454.1	612	Brassica napus	core promoter element around -30 of transcription start	Common	Common
CsSAUR6	CSS0004454.1	613	Arabidopsis thaliana	core promoter element around -30 of transcription start	Common	Common
CsSAUR6	CSS0004454.1	614	Arabidopsis thaliana	core promoter element around -30 of transcription start	Common	Common
CsSAUR6	CSS0004454.1	719	Brassica napus	core promoter element around -30 of transcription start	Common	Common
CsSAUR6	CSS0004454.1	720	Arabidopsis thaliana	core promoter element around -30 of transcription start	Common	Common
CsSAUR6	CSS0004454.1	740	Arabidopsis thaliana	core promoter element around -30 of transcription start	Common	Common
CsSAUR6	CSS0004454.1	785	Brassica napus	core promoter element around -30 of transcription start	Common	Common
CsSAUR6	CSS0004454.1	786	Arabidopsis thaliana	core promoter element around -30 of transcription start	Common	Common
CsSAUR6	CSS0004454.1	787	Brassica napus	core promoter element around -30 of transcription start	Common	Common
CsSAUR6	CSS0004454.1	788	Arabidopsis thaliana	core promoter element around -30 of transcription start	Common	Common
CsSAUR6	CSS0004454.1	848	Arabidopsis thaliana	core promoter element around -30 of transcription start	Common	Common
CsSAUR6	CSS0004454.1	849	Arabidopsis thaliana	core promoter element around -30 of transcription start	Common	Common
CsSAUR6	CSS0004454.1	985	Brassica napus	core promoter element around -30 of transcription start	Common	Common
CsSAUR6	CSS0004454.1	986	Arabidopsis thaliana	core promoter element around -30 of transcription start	Common	Common
CsSAUR6	CSS0004454.1	987	Arabidopsis thaliana	core promoter element around -30 of transcription start	Common	Common
CsSAUR6	CSS0004454.1	1049	Helianthus annuus	core promoter element around -30 of transcription start	Common	Common
CsSAUR6	CSS0004454.1	1050	Arabidopsis thaliana	core promoter element around -30 of transcription start	Common	Common
CsSAUR6	CSS0004454.1	1051	Arabidopsis thaliana	core promoter element around -30 of transcription start	Common	Common
CsSAUR6	CSS0004454.1	1134	Oryza sativa	core promoter element around -30 of transcription start	Common	Common
CsSAUR6	CSS0004454.1	1201	Arabidopsis thaliana	core promoter element around -30 of transcription start	Common	Common
CsSAUR6	CSS0004454.1	1213	Brassica oleracea	core promoter element around -30 of transcription start	Common	Common
CsSAUR6	CSS0004454.1	1214	Arabidopsis thaliana	core promoter element around -30 of transcription start	Common	Common
CsSAUR6	CSS0004454.1	1364	Brassica oleracea	core promoter element around -30 of transcription start	Common	Common
CsSAUR6	CSS0004454.1	1365	Arabidopsis thaliana	core promoter element around -30 of transcription start	Common	Common
CsSAUR6	CSS0004454.1	1502	Brassica napus	core promoter element around -30 of transcription start	Common	Common
CsSAUR6	CSS0004454.1	1503	Arabidopsis thaliana	core promoter element around -30 of transcription start	Common	Common
CsSAUR6	CSS0004454.1	1504	Brassica napus	core promoter element around -30 of transcription start	Common	Common
CsSAUR6	CSS0004454.1	1505	Arabidopsis thaliana	core promoter element around -30 of transcription start	Common	Common
CsSAUR6	CSS0004454.1	1506	Brassica napus	core promoter element around -30 of transcription start	Common	Common
CsSAUR6	CSS0004454.1	1507	Arabidopsis thaliana	core promoter element around -30 of transcription start	Common	Common
CsSAUR6	CSS0004454.1	1508	Brassica napus	core promoter element around -30 of transcription start	Common	Common
CsSAUR6	CSS0004454.1	1509	Arabidopsis thaliana	core promoter element around -30 of transcription start	Common	Common
CsSAUR6	CSS0004454.1	1510	Brassica napus	core promoter element around -30 of transcription start	Common	Common
CsSAUR6	CSS0004454.1	1511	Arabidopsis thaliana	core promoter element around -30 of transcription start	Common	Common
CsSAUR6	CSS0004454.1	1512	Brassica napus	core promoter element around -30 of transcription start	Common	Common
CsSAUR6	CSS0004454.1	1513	Arabidopsis thaliana	core promoter element around -30 of transcription start	Common	Common
CsSAUR6	CSS0004454.1	1514	Brassica napus	core promoter element around -30 of transcription start	Common	Common
CsSAUR6	CSS0004454.1	1515	Arabidopsis thaliana	core promoter element around -30 of transcription start	Common	Common
CsSAUR6	CSS0004454.1	1516	Brassica napus	core promoter element around -30 of transcription start	Common	Common
CsSAUR6	CSS0004454.1	1517	Arabidopsis thaliana	core promoter element around -30 of transcription start	Common	Common
CsSAUR6	CSS0004454.1	1518	Brassica oleracea	core promoter element around -30 of transcription start	Common	Common
CsSAUR6	CSS0004454.1	1519	Arabidopsis thaliana	core promoter element around -30 of transcription start	Common	Common
CsSAUR6	CSS0004454.1	1641	Arabidopsis thaliana	core promoter element around -30 of transcription start	Common	Common
CsSAUR6	CSS0004454.1	1646	Arabidopsis thaliana	core promoter element around -30 of transcription start	Common	Common
CsSAUR6	CSS0004454.1	1233	Zea mays		NA	NA
CsSAUR6	CSS0004454.1	1233	Arabidopsis thaliana	cis-acting regulatory element involved in light responsiveness	Environment	Light
CsSAUR6	CSS0004454.1	844	Arabidopsis thaliana	part of a light responsive element	Environment	Light
CsSAUR6	CSS0004454.1	1231	Zea mays		NA	NA
CsSAUR6	CSS0004454.1	1790	Petroselinum crispum	cis-acting regulatory element	Common	Common
CsSAUR6	CSS0004454.1	11	Arabidopsis thaliana		NA	NA
CsSAUR6	CSS0004454.1	50	Arabidopsis thaliana		NA	NA
CsSAUR6	CSS0004454.1	301	Arabidopsis thaliana		NA	NA
CsSAUR6	CSS0004454.1	320	Arabidopsis thaliana		NA	NA
CsSAUR6	CSS0004454.1	356	Arabidopsis thaliana		NA	NA
CsSAUR6	CSS0004454.1	415	Arabidopsis thaliana		NA	NA
CsSAUR6	CSS0004454.1	1233	Arabidopsis thaliana	cis-acting element involved in the abscisic acid responsiveness	Phytohormone	Abscisic acid
CsSAUR6	CSS0004454.1	780	Zea mays	cis-acting regulatory element essential for the anaerobic induction	Environment	Anaerobic
CsSAUR6	CSS0004454.1	139	Brassica oleracea	auxin-responsive element	Phytohormone	Auxin
CsSAUR6	CSS0004454.1	563	Brassica oleracea	auxin-responsive element	Phytohormone	Auxin
CsSAUR6	CSS0004454.1	1865	Brassica oleracea	auxin-responsive element	Phytohormone	Auxin
CsSAUR6	CSS0004454.1	402	organism	short_function	Common	Common
CsSAUR6	CSS0004454.1	479	organism	short_function	Common	Common
CsSAUR6	CSS0004454.1	826	organism	short_function	Common	Common
CsSAUR6	CSS0004454.1	899	organism	short_function	Common	Common
CsSAUR6	CSS0004454.1	910	organism	short_function	Common	Common
CsSAUR6	CSS0004454.1	970	organism	short_function	Common	Common
CsSAUR6	CSS0004454.1	1242	organism	short_function	Common	Common
CsSAUR6	CSS0004454.1	1893	organism	short_function	Common	Common
CsSAUR18	CSS0004553.1	881	organism	short_function	Common	Common
CsSAUR18	CSS0004553.1	1055	organism	short_function	Common	Common
CsSAUR18	CSS0004553.1	1138	organism	short_function	Common	Common
CsSAUR18	CSS0004553.1	1566	organism	short_function	Common	Common
CsSAUR18	CSS0004553.1	1591	organism	short_function	Common	Common
CsSAUR18	CSS0004553.1	1623	organism	short_function	Common	Common
CsSAUR18	CSS0004553.1	1889	organism	short_function	Common	Common
CsSAUR18	CSS0004553.1	1900	organism	short_function	Common	Common
CsSAUR18	CSS0004553.1	1448	Zea mays	cis-acting regulatory element essential for the anaerobic induction	Environment	Anaerobic
CsSAUR18	CSS0004553.1	1554	Brassica oleracea	auxin-responsive element	Phytohormone	Auxin
CsSAUR18	CSS0004553.1	351	Arabidopsis thaliana	cis-acting element involved in the abscisic acid responsiveness	Phytohormone	Abscisic acid
CsSAUR18	CSS0004553.1	1704	Pisum sativum		NA	NA
CsSAUR18	CSS0004553.1	1707	Pisum sativum		NA	NA
CsSAUR18	CSS0004553.1	1710	Pisum sativum		NA	NA
CsSAUR18	CSS0004553.1	1062	Arabidopsis thaliana		NA	NA
CsSAUR18	CSS0004553.1	40	Nicotiana glutinosa		NA	NA
CsSAUR18	CSS0004553.1	74	Arabidopsis thaliana	common cis-acting element in promoter and enhancer regions	Common	Common
CsSAUR18	CSS0004553.1	208	Pisum sativum	common cis-acting element in promoter and enhancer regions	Common	Common
CsSAUR18	CSS0004553.1	309	Nicotiana glutinosa		NA	NA
CsSAUR18	CSS0004553.1	401	Nicotiana glutinosa		NA	NA
CsSAUR18	CSS0004553.1	421	Pisum sativum	common cis-acting element in promoter and enhancer regions	Common	Common
CsSAUR18	CSS0004553.1	428	Nicotiana glutinosa		NA	NA
CsSAUR18	CSS0004553.1	488	Nicotiana glutinosa		NA	NA
CsSAUR18	CSS0004553.1	516	Arabidopsis thaliana	common cis-acting element in promoter and enhancer regions	Common	Common
CsSAUR18	CSS0004553.1	540	Nicotiana glutinosa		NA	NA
CsSAUR18	CSS0004553.1	559	Nicotiana glutinosa		NA	NA
CsSAUR18	CSS0004553.1	591	Nicotiana glutinosa		NA	NA
CsSAUR18	CSS0004553.1	596	Nicotiana glutinosa		NA	NA
CsSAUR18	CSS0004553.1	618	Pisum sativum	common cis-acting element in promoter and enhancer regions	Common	Common
CsSAUR18	CSS0004553.1	621	Nicotiana glutinosa		NA	NA
CsSAUR18	CSS0004553.1	636	Nicotiana glutinosa		NA	NA
CsSAUR18	CSS0004553.1	732	Nicotiana glutinosa		NA	NA
CsSAUR18	CSS0004553.1	780	Nicotiana glutinosa		NA	NA
CsSAUR18	CSS0004553.1	800	Pisum sativum	common cis-acting element in promoter and enhancer regions	Common	Common
CsSAUR18	CSS0004553.1	831	Nicotiana glutinosa		NA	NA
CsSAUR18	CSS0004553.1	840	Pisum sativum	common cis-acting element in promoter and enhancer regions	Common	Common
CsSAUR18	CSS0004553.1	929	Pisum sativum	common cis-acting element in promoter and enhancer regions	Common	Common
CsSAUR18	CSS0004553.1	966	Nicotiana glutinosa		NA	NA
CsSAUR18	CSS0004553.1	1019	Pisum sativum	common cis-acting element in promoter and enhancer regions	Common	Common
CsSAUR18	CSS0004553.1	1063	Pisum sativum	common cis-acting element in promoter and enhancer regions	Common	Common
CsSAUR18	CSS0004553.1	1374	Pisum sativum	common cis-acting element in promoter and enhancer regions	Common	Common
CsSAUR18	CSS0004553.1	1387	Pisum sativum	common cis-acting element in promoter and enhancer regions	Common	Common
CsSAUR18	CSS0004553.1	1467	Arabidopsis thaliana	common cis-acting element in promoter and enhancer regions	Common	Common
CsSAUR18	CSS0004553.1	1682	Nicotiana glutinosa		NA	NA
CsSAUR18	CSS0004553.1	1693	Nicotiana glutinosa		NA	NA
CsSAUR18	CSS0004553.1	1700	Nicotiana glutinosa		NA	NA
CsSAUR18	CSS0004553.1	1728	Nicotiana glutinosa		NA	NA
CsSAUR18	CSS0004553.1	1748	Nicotiana glutinosa		NA	NA
CsSAUR18	CSS0004553.1	1964	Nicotiana glutinosa		NA	NA
CsSAUR18	CSS0004553.1	1994	Nicotiana glutinosa		NA	NA
CsSAUR18	CSS0004553.1	116	Arabidopsis thaliana	core promoter element around -30 of transcription start	Common	Common
CsSAUR18	CSS0004553.1	117	Arabidopsis thaliana	core promoter element around -30 of transcription start	Common	Common
CsSAUR18	CSS0004553.1	118	Brassica oleracea	core promoter element around -30 of transcription start	Common	Common
CsSAUR18	CSS0004553.1	119	Arabidopsis thaliana	core promoter element around -30 of transcription start	Common	Common
CsSAUR18	CSS0004553.1	202	Brassica oleracea	core promoter element around -30 of transcription start	Common	Common
CsSAUR18	CSS0004553.1	203	Arabidopsis thaliana	core promoter element around -30 of transcription start	Common	Common
CsSAUR18	CSS0004553.1	217	Oryza sativa	core promoter element around -30 of transcription start	Common	Common
CsSAUR18	CSS0004553.1	311	Brassica napus	core promoter element around -30 of transcription start	Common	Common
CsSAUR18	CSS0004553.1	312	Arabidopsis thaliana	core promoter element around -30 of transcription start	Common	Common
CsSAUR18	CSS0004553.1	314	Arabidopsis thaliana	core promoter element around -30 of transcription start	Common	Common
CsSAUR18	CSS0004553.1	338	Pisum sativum	core promoter element around -30 of transcription start	Common	Common
CsSAUR18	CSS0004553.1	339	Helianthus annuus	core promoter element around -30 of transcription start	Common	Common
CsSAUR18	CSS0004553.1	340	Arabidopsis thaliana	core promoter element around -30 of transcription start	Common	Common
CsSAUR18	CSS0004553.1	341	Arabidopsis thaliana	core promoter element around -30 of transcription start	Common	Common
CsSAUR18	CSS0004553.1	610	Brassica napus	core promoter element around -30 of transcription start	Common	Common
CsSAUR18	CSS0004553.1	611	Arabidopsis thaliana	core promoter element around -30 of transcription start	Common	Common
CsSAUR18	CSS0004553.1	612	Brassica oleracea	core promoter element around -30 of transcription start	Common	Common
CsSAUR18	CSS0004553.1	613	Arabidopsis thaliana	core promoter element around -30 of transcription start	Common	Common
CsSAUR18	CSS0004553.1	672	Brassica oleracea	core promoter element around -30 of transcription start	Common	Common
CsSAUR18	CSS0004553.1	673	Arabidopsis thaliana	core promoter element around -30 of transcription start	Common	Common
CsSAUR18	CSS0004553.1	680	Oryza sativa	core promoter element around -30 of transcription start	Common	Common
CsSAUR18	CSS0004553.1	822	Pisum sativum	core promoter element around -30 of transcription start	Common	Common
CsSAUR18	CSS0004553.1	823	Helianthus annuus	core promoter element around -30 of transcription start	Common	Common
CsSAUR18	CSS0004553.1	824	Arabidopsis thaliana	core promoter element around -30 of transcription start	Common	Common
CsSAUR18	CSS0004553.1	825	Arabidopsis thaliana	core promoter element around -30 of transcription start	Common	Common
CsSAUR18	CSS0004553.1	995	Brassica napus	core promoter element around -30 of transcription start	Common	Common
CsSAUR18	CSS0004553.1	996	Arabidopsis thaliana	core promoter element around -30 of transcription start	Common	Common
CsSAUR18	CSS0004553.1	1046	Arabidopsis thaliana	core promoter element around -30 of transcription start	Common	Common
CsSAUR18	CSS0004553.1	1047	Brassica napus	core promoter element around -30 of transcription start	Common	Common
CsSAUR18	CSS0004553.1	1048	Arabidopsis thaliana	core promoter element around -30 of transcription start	Common	Common
CsSAUR18	CSS0004553.1	1109	Brassica napus	core promoter element around -30 of transcription start	Common	Common
CsSAUR18	CSS0004553.1	1110	Arabidopsis thaliana	core promoter element around -30 of transcription start	Common	Common
CsSAUR18	CSS0004553.1	1112	Arabidopsis thaliana	core promoter element around -30 of transcription start	Common	Common
CsSAUR18	CSS0004553.1	1122	Brassica napus	core promoter element around -30 of transcription start	Common	Common
CsSAUR18	CSS0004553.1	1123	Arabidopsis thaliana	core promoter element around -30 of transcription start	Common	Common
CsSAUR18	CSS0004553.1	1124	Arabidopsis thaliana	core promoter element around -30 of transcription start	Common	Common
CsSAUR18	CSS0004553.1	1125	Brassica oleracea	core promoter element around -30 of transcription start	Common	Common
CsSAUR18	CSS0004553.1	1126	Arabidopsis thaliana	core promoter element around -30 of transcription start	Common	Common
CsSAUR18	CSS0004553.1	1132	Arabidopsis thaliana	core promoter element around -30 of transcription start	Common	Common
CsSAUR18	CSS0004553.1	1170	Arabidopsis thaliana	core promoter element around -30 of transcription start	Common	Common
CsSAUR18	CSS0004553.1	1171	Arabidopsis thaliana	core promoter element around -30 of transcription start	Common	Common
CsSAUR18	CSS0004553.1	1245	Brassica napus	core promoter element around -30 of transcription start	Common	Common
CsSAUR18	CSS0004553.1	1246	Arabidopsis thaliana	core promoter element around -30 of transcription start	Common	Common
CsSAUR18	CSS0004553.1	1247	Arabidopsis thaliana	core promoter element around -30 of transcription start	Common	Common
CsSAUR18	CSS0004553.1	1266	Brassica napus	core promoter element around -30 of transcription start	Common	Common
CsSAUR18	CSS0004553.1	1267	Arabidopsis thaliana	core promoter element around -30 of transcription start	Common	Common
CsSAUR18	CSS0004553.1	1268	Arabidopsis thaliana	core promoter element around -30 of transcription start	Common	Common
CsSAUR18	CSS0004553.1	1325	Daucus carota	core promoter element around -30 of transcription start	Common	Common
CsSAUR18	CSS0004553.1	1326	Brassica juncea	core promoter element around -30 of transcription start	Common	Common
CsSAUR18	CSS0004553.1	1327	Helianthus annuus	core promoter element around -30 of transcription start	Common	Common
CsSAUR18	CSS0004553.1	1328	Arabidopsis thaliana	core promoter element around -30 of transcription start	Common	Common
CsSAUR18	CSS0004553.1	1329	Arabidopsis thaliana	core promoter element around -30 of transcription start	Common	Common
CsSAUR18	CSS0004553.1	1341	Arabidopsis thaliana	core promoter element around -30 of transcription start	Common	Common
CsSAUR18	CSS0004553.1	1342	Brassica napus	core promoter element around -30 of transcription start	Common	Common
CsSAUR18	CSS0004553.1	1343	Arabidopsis thaliana	core promoter element around -30 of transcription start	Common	Common
CsSAUR18	CSS0004553.1	1344	Brassica napus	core promoter element around -30 of transcription start	Common	Common
CsSAUR18	CSS0004553.1	1345	Arabidopsis thaliana	core promoter element around -30 of transcription start	Common	Common
CsSAUR18	CSS0004553.1	1346	Brassica napus	core promoter element around -30 of transcription start	Common	Common
CsSAUR18	CSS0004553.1	1347	Arabidopsis thaliana	core promoter element around -30 of transcription start	Common	Common
CsSAUR18	CSS0004553.1	1348	Brassica napus	core promoter element around -30 of transcription start	Common	Common
CsSAUR18	CSS0004553.1	1349	Avena sativa	core promoter element around -30 of transcription start	Common	Common
CsSAUR18	CSS0004553.1	1350	Brassica napus	core promoter element around -30 of transcription start	Common	Common
CsSAUR18	CSS0004553.1	1351	Arabidopsis thaliana	core promoter element around -30 of transcription start	Common	Common
CsSAUR18	CSS0004553.1	1352	Brassica napus	core promoter element around -30 of transcription start	Common	Common
CsSAUR18	CSS0004553.1	1353	Arabidopsis thaliana	core promoter element around -30 of transcription start	Common	Common
CsSAUR18	CSS0004553.1	1354	Brassica napus	core promoter element around -30 of transcription start	Common	Common
CsSAUR18	CSS0004553.1	1355	Arabidopsis thaliana	core promoter element around -30 of transcription start	Common	Common
CsSAUR18	CSS0004553.1	1377	Brassica juncea	core promoter element around -30 of transcription start	Common	Common
CsSAUR18	CSS0004553.1	1378	Helianthus annuus	core promoter element around -30 of transcription start	Common	Common
CsSAUR18	CSS0004553.1	1379	Arabidopsis thaliana	core promoter element around -30 of transcription start	Common	Common
CsSAUR18	CSS0004553.1	1380	Arabidopsis thaliana	core promoter element around -30 of transcription start	Common	Common
CsSAUR18	CSS0004553.1	1427	Helianthus annuus	core promoter element around -30 of transcription start	Common	Common
CsSAUR18	CSS0004553.1	1429	Arabidopsis thaliana	core promoter element around -30 of transcription start	Common	Common
CsSAUR18	CSS0004553.1	1520	Brassica oleracea	core promoter element around -30 of transcription start	Common	Common
CsSAUR18	CSS0004553.1	1521	Arabidopsis thaliana	core promoter element around -30 of transcription start	Common	Common
CsSAUR18	CSS0004553.1	1549	Arabidopsis thaliana	core promoter element around -30 of transcription start	Common	Common
CsSAUR18	CSS0004553.1	1550	Arabidopsis thaliana	core promoter element around -30 of transcription start	Common	Common
CsSAUR18	CSS0004553.1	1641	Arabidopsis thaliana	core promoter element around -30 of transcription start	Common	Common
CsSAUR18	CSS0004553.1	1786	Helianthus annuus	core promoter element around -30 of transcription start	Common	Common
CsSAUR18	CSS0004553.1	1788	Arabidopsis thaliana	core promoter element around -30 of transcription start	Common	Common
CsSAUR18	CSS0004553.1	1865	Arabidopsis thaliana	core promoter element around -30 of transcription start	Common	Common
CsSAUR18	CSS0004553.1	1932	Oryza sativa	core promoter element around -30 of transcription start	Common	Common
CsSAUR18	CSS0004553.1	1538	Arabidopsis thaliana	part of a module for light response	Environment	Light
CsSAUR18	CSS0004553.1	328	Pisum sativum	element for maximal elicitor-mediated activation (2copies)	Environment	Elicitor
CsSAUR18	CSS0004553.1	650	Arabidopsis thaliana	cis-acting regulatory element related to meristem expression	Tissue	Meristem
CsSAUR18	CSS0004553.1	1755	Zea mays		NA	NA
CsSAUR18	CSS0004553.1	117	Arabidopsis thaliana		NA	NA
CsSAUR18	CSS0004553.1	312	Arabidopsis thaliana		NA	NA
CsSAUR18	CSS0004553.1	611	Arabidopsis thaliana		NA	NA
CsSAUR18	CSS0004553.1	1046	Arabidopsis thaliana		NA	NA
CsSAUR18	CSS0004553.1	1110	Arabidopsis thaliana		NA	NA
CsSAUR18	CSS0004553.1	1124	Arabidopsis thaliana		NA	NA
CsSAUR18	CSS0004553.1	1341	Arabidopsis thaliana		NA	NA
CsSAUR18	CSS0004553.1	1343	Arabidopsis thaliana		NA	NA
CsSAUR18	CSS0004553.1	1345	Arabidopsis thaliana		NA	NA
CsSAUR18	CSS0004553.1	1347	Arabidopsis thaliana		NA	NA
CsSAUR18	CSS0004553.1	1349	Arabidopsis thaliana		NA	NA
CsSAUR18	CSS0004553.1	1351	Arabidopsis thaliana		NA	NA
CsSAUR18	CSS0004553.1	1353	Arabidopsis thaliana		NA	NA
CsSAUR18	CSS0004553.1	1029	Nicotiana glutinosa		NA	NA
CsSAUR18	CSS0004553.1	754	Arabidopsis thaliana		NA	NA
CsSAUR18	CSS0004553.1	1600	Arabidopsis thaliana		NA	NA
CsSAUR18	CSS0004553.1	543	Arabidopsis thaliana	part of a light responsive element	Environment	Light
CsSAUR18	CSS0004553.1	624	Arabidopsis thaliana	part of a light responsive element	Environment	Light
CsSAUR18	CSS0004553.1	639	Arabidopsis thaliana	part of a light responsive element	Environment	Light
CsSAUR18	CSS0004553.1	684	Arabidopsis thaliana	part of a light responsive element	Environment	Light
CsSAUR18	CSS0004553.1	874	Oryza sativa	gibberellin-responsive element	Phytohormone	Gibberellin
CsSAUR18	CSS0004553.1	587	Petroselinum crispum	part of a conserved DNA module involved in light responsiveness	Environment	Light
CsSAUR18	CSS0004553.1	668	Petroselinum crispum	part of a conserved DNA module involved in light responsiveness	Environment	Light
CsSAUR18	CSS0004553.1	959	Petroselinum crispum	part of a conserved DNA module involved in light responsiveness	Environment	Light
CsSAUR18	CSS0004553.1	1413	Nicotiana tabacum		NA	NA
CsSAUR18	CSS0004553.1	1573	Nicotiana tabacum		NA	NA
CsSAUR18	CSS0004553.1	277	Zea mays		NA	NA
CsSAUR18	CSS0004553.1	441	Glycine max	60K protein binding site	Common	Common
CsSAUR18	CSS0004553.1	821	Arabidopsis thaliana		NA	NA
CsSAUR18	CSS0004553.1	351	Pisum sativum	cis-acting regulatory element involved in light responsiveness	Environment	Light
CsSAUR18	CSS0004553.1	78	Arabidopsis thaliana	light responsive element	Environment	Light
CsSAUR18	CSS0004553.1	1304	Pisum sativum		NA	NA
CsSAUR18	CSS0004553.1	1167	Arabidopsis thaliana		NA	NA
CsSAUR18	CSS0004553.1	1393	Arabidopsis thaliana		NA	NA
CsSAUR18	CSS0004553.1	407	Nicotiana glutinos		NA	NA
CsSAUR18	CSS0004553.1	1358	Nicotiana glutinos		NA	NA
CsSAUR18	CSS0004553.1	1413	Arabidopsis thaliana		NA	NA
CsSAUR18	CSS0004553.1	1573	Arabidopsis thaliana		NA	NA
CsSAUR18	CSS0004553.1	1717	Oryza sativa	cis-regulatory element involved in endosperm expression	Tissue	Endosperm
CsSAUR18	CSS0004553.1	3	Petroselinum crispum	MYB binding site involved in light responsiveness	TF	MYB Binding Site
CsSAUR18	CSS0004553.1	881	Petroselinum hortense		NA	NA
CsSAUR18	CSS0004553.1	1138	Petroselinum hortense		NA	NA
CsSAUR18	CSS0004553.1	1593	Petroselinum hortense		NA	NA
CsSAUR18	CSS0004553.1	1623	Petroselinum hortense		NA	NA
CsSAUR18	CSS0004553.1	1631	Petroselinum hortense		NA	NA
CsSAUR18	CSS0004553.1	1978	Petroselinum hortense		NA	NA
CsSAUR18	CSS0004553.1	383	Pisum sativum	part of a conserved DNA module involved in light responsiveness	Environment	Light
CsSAUR74	CSS0004746.1	1152	Nicotiana tabacum		NA	NA
CsSAUR74	CSS0004746.1	1451	Nicotiana tabacum		NA	NA
CsSAUR74	CSS0004746.1	17	Petroselinum crispum	part of a conserved DNA module involved in light responsiveness	Environment	Light
CsSAUR74	CSS0004746.1	435	Petroselinum crispum	part of a conserved DNA module involved in light responsiveness	Environment	Light
CsSAUR74	CSS0004746.1	865	Petroselinum crispum	part of a conserved DNA module involved in light responsiveness	Environment	Light
CsSAUR74	CSS0004746.1	692	Arabidopsis thaliana	part of a light responsive element	Environment	Light
CsSAUR74	CSS0004746.1	1905	Arabidopsis thaliana	part of a light responsive element	Environment	Light
CsSAUR74	CSS0004746.1	765	Arabidopsis thaliana		NA	NA
CsSAUR74	CSS0004746.1	116	Arabidopsis thaliana		NA	NA
CsSAUR74	CSS0004746.1	947	Arabidopsis thaliana		NA	NA
CsSAUR74	CSS0004746.1	987	Arabidopsis thaliana		NA	NA
CsSAUR74	CSS0004746.1	1284	Arabidopsis thaliana		NA	NA
CsSAUR74	CSS0004746.1	1662	Arabidopsis thaliana		NA	NA
CsSAUR74	CSS0004746.1	1664	Arabidopsis thaliana		NA	NA
CsSAUR74	CSS0004746.1	722	Oryza sativa	gibberellin-responsive element	Phytohormone	Gibberellin
CsSAUR74	CSS0004746.1	154	Arabidopsis thaliana		NA	NA
CsSAUR74	CSS0004746.1	197	Arabidopsis thaliana		NA	NA
CsSAUR74	CSS0004746.1	1082	Arabidopsis thaliana		NA	NA
CsSAUR74	CSS0004746.1	1152	Arabidopsis thaliana		NA	NA
CsSAUR74	CSS0004746.1	1241	Arabidopsis thaliana		NA	NA
CsSAUR74	CSS0004746.1	1245	Arabidopsis thaliana		NA	NA
CsSAUR74	CSS0004746.1	1451	Arabidopsis thaliana		NA	NA
CsSAUR74	CSS0004746.1	1561	Arabidopsis thaliana		NA	NA
CsSAUR74	CSS0004746.1	1668	Arabidopsis thaliana		NA	NA
CsSAUR74	CSS0004746.1	210	Nicotiana glutinos		NA	NA
CsSAUR74	CSS0004746.1	471	Petroselinum hortense		NA	NA
CsSAUR74	CSS0004746.1	789	Petroselinum hortense		NA	NA
CsSAUR74	CSS0004746.1	840	Petroselinum hortense		NA	NA
CsSAUR74	CSS0004746.1	1188	Petroselinum hortense		NA	NA
CsSAUR74	CSS0004746.1	1299	Petroselinum hortense		NA	NA
CsSAUR74	CSS0004746.1	1370	Petroselinum hortense		NA	NA
CsSAUR74	CSS0004746.1	1863	Petroselinum hortense		NA	NA
CsSAUR74	CSS0004746.1	1151	Brassica oleracea	gibberellin-responsive element	Phytohormone	Gibberellin
CsSAUR74	CSS0004746.1	1187	Spinacia oleracea	part of a light responsive element	Environment	Light
CsSAUR74	CSS0004746.1	1240	Arabidopsis thaliana	light responsive element	Environment	Light
CsSAUR74	CSS0004746.1	1900	Arabidopsis thaliana		NA	NA
CsSAUR74	CSS0004746.1	1534	Pisum sativum		NA	NA
CsSAUR74	CSS0004746.1	790	Arabidopsis thaliana	part of a light responsive element	Environment	Light
CsSAUR74	CSS0004746.1	701	Arabidopsis thaliana		NA	NA
CsSAUR74	CSS0004746.1	1900	Arabidopsis thaliana	MYB binding site involved in drought-inducibility	TF	MYB Binding Site
CsSAUR74	CSS0004746.1	728	Nicotiana tabacum	cis-acting element involved in defense and stress responsiveness	Environment	Mixed stress
CsSAUR74	CSS0004746.1	223	Zea mays	cis-acting regulatory element essential for the anaerobic induction	Environment	Anaerobic
CsSAUR74	CSS0004746.1	482	Zea mays	cis-acting regulatory element essential for the anaerobic induction	Environment	Anaerobic
CsSAUR74	CSS0004746.1	1002	Zea mays	cis-acting regulatory element essential for the anaerobic induction	Environment	Anaerobic
CsSAUR74	CSS0004746.1	1574	Zea mays	cis-acting regulatory element essential for the anaerobic induction	Environment	Anaerobic
CsSAUR74	CSS0004746.1	1588	Zea mays	cis-acting regulatory element essential for the anaerobic induction	Environment	Anaerobic
CsSAUR74	CSS0004746.1	1960	Zea mays	cis-acting regulatory element essential for the anaerobic induction	Environment	Anaerobic
CsSAUR74	CSS0004746.1	183	organism	short_function	Common	Common
CsSAUR74	CSS0004746.1	309	organism	short_function	Common	Common
CsSAUR74	CSS0004746.1	396	organism	short_function	Common	Common
CsSAUR74	CSS0004746.1	638	organism	short_function	Common	Common
CsSAUR74	CSS0004746.1	760	organism	short_function	Common	Common
CsSAUR74	CSS0004746.1	794	organism	short_function	Common	Common
CsSAUR74	CSS0004746.1	1054	organism	short_function	Common	Common
CsSAUR74	CSS0004746.1	1123	organism	short_function	Common	Common
CsSAUR74	CSS0004746.1	1522	organism	short_function	Common	Common
CsSAUR74	CSS0004746.1	1529	organism	short_function	Common	Common
CsSAUR74	CSS0004746.1	1878	organism	short_function	Common	Common
CsSAUR74	CSS0004746.1	1895	organism	short_function	Common	Common
CsSAUR74	CSS0004746.1	1980	organism	short_function	Common	Common
CsSAUR74	CSS0004746.1	772	Zea mays		NA	NA
CsSAUR74	CSS0004746.1	6	Lycopersicon esculentum	cis-acting regulatory element involved in circadian control	Stage	Circadian
CsSAUR74	CSS0004746.1	1806	Arabidopsis thaliana	cis-acting regulatory element related to meristem expression	Tissue	Meristem
CsSAUR74	CSS0004746.1	229	Arabidopsis thaliana		NA	NA
CsSAUR74	CSS0004746.1	686	Arabidopsis thaliana		NA	NA
CsSAUR74	CSS0004746.1	696	Arabidopsis thaliana		NA	NA
CsSAUR74	CSS0004746.1	1122	Arabidopsis thaliana		NA	NA
CsSAUR74	CSS0004746.1	1275	Arabidopsis thaliana		NA	NA
CsSAUR74	CSS0004746.1	1489	Arabidopsis thaliana		NA	NA
CsSAUR74	CSS0004746.1	1612	Arabidopsis thaliana		NA	NA
CsSAUR74	CSS0004746.1	49	Pisum sativum	common cis-acting element in promoter and enhancer regions	Common	Common
CsSAUR74	CSS0004746.1	80	Nicotiana glutinosa		NA	NA
CsSAUR74	CSS0004746.1	89	Pisum sativum	common cis-acting element in promoter and enhancer regions	Common	Common
CsSAUR74	CSS0004746.1	103	Pisum sativum	common cis-acting element in promoter and enhancer regions	Common	Common
CsSAUR74	CSS0004746.1	131	Nicotiana glutinosa		NA	NA
CsSAUR74	CSS0004746.1	230	Pisum sativum	common cis-acting element in promoter and enhancer regions	Common	Common
CsSAUR74	CSS0004746.1	251	Nicotiana glutinosa		NA	NA
CsSAUR74	CSS0004746.1	255	Nicotiana glutinosa		NA	NA
CsSAUR74	CSS0004746.1	306	Nicotiana glutinosa		NA	NA
CsSAUR74	CSS0004746.1	359	Nicotiana glutinosa		NA	NA
CsSAUR74	CSS0004746.1	383	Pisum sativum	common cis-acting element in promoter and enhancer regions	Common	Common
CsSAUR74	CSS0004746.1	439	Pisum sativum	common cis-acting element in promoter and enhancer regions	Common	Common
CsSAUR74	CSS0004746.1	451	Pisum sativum	common cis-acting element in promoter and enhancer regions	Common	Common
CsSAUR74	CSS0004746.1	462	Arabidopsis thaliana	common cis-acting element in promoter and enhancer regions	Common	Common
CsSAUR74	CSS0004746.1	463	Nicotiana glutinosa		NA	NA
CsSAUR74	CSS0004746.1	480	Arabidopsis thaliana	common cis-acting element in promoter and enhancer regions	Common	Common
CsSAUR74	CSS0004746.1	578	Nicotiana glutinosa		NA	NA
CsSAUR74	CSS0004746.1	659	Arabidopsis thaliana	common cis-acting element in promoter and enhancer regions	Common	Common
CsSAUR74	CSS0004746.1	686	Pisum sativum	common cis-acting element in promoter and enhancer regions	Common	Common
CsSAUR74	CSS0004746.1	697	Pisum sativum	common cis-acting element in promoter and enhancer regions	Common	Common
CsSAUR74	CSS0004746.1	734	Nicotiana glutinosa		NA	NA
CsSAUR74	CSS0004746.1	887	Nicotiana glutinosa		NA	NA
CsSAUR74	CSS0004746.1	925	Nicotiana glutinosa		NA	NA
CsSAUR74	CSS0004746.1	972	Nicotiana glutinosa		NA	NA
CsSAUR74	CSS0004746.1	1031	Nicotiana glutinosa		NA	NA
CsSAUR74	CSS0004746.1	1215	Pisum sativum	common cis-acting element in promoter and enhancer regions	Common	Common
CsSAUR74	CSS0004746.1	1231	Nicotiana glutinosa		NA	NA
CsSAUR74	CSS0004746.1	1248	Arabidopsis thaliana	common cis-acting element in promoter and enhancer regions	Common	Common
CsSAUR74	CSS0004746.1	1249	Nicotiana glutinosa		NA	NA
CsSAUR74	CSS0004746.1	1258	Nicotiana glutinosa		NA	NA
CsSAUR74	CSS0004746.1	1267	Nicotiana glutinosa		NA	NA
CsSAUR74	CSS0004746.1	1275	Nicotiana glutinosa		NA	NA
CsSAUR74	CSS0004746.1	1277	Arabidopsis thaliana	common cis-acting element in promoter and enhancer regions	Common	Common
CsSAUR74	CSS0004746.1	1479	Pisum sativum	common cis-acting element in promoter and enhancer regions	Common	Common
CsSAUR74	CSS0004746.1	1490	Pisum sativum	common cis-acting element in promoter and enhancer regions	Common	Common
CsSAUR74	CSS0004746.1	1550	Nicotiana glutinosa		NA	NA
CsSAUR74	CSS0004746.1	1738	Nicotiana glutinosa		NA	NA
CsSAUR74	CSS0004746.1	1774	Nicotiana glutinosa		NA	NA
CsSAUR74	CSS0004746.1	1973	Nicotiana glutinosa		NA	NA
CsSAUR74	CSS0004746.1	1241	Arabidopsis thaliana		NA	NA
CsSAUR74	CSS0004746.1	1561	Arabidopsis thaliana		NA	NA
CsSAUR74	CSS0004746.1	1668	Arabidopsis thaliana		NA	NA
CsSAUR74	CSS0004746.1	11	Brassica oleracea	core promoter element around -30 of transcription start	Common	Common
CsSAUR74	CSS0004746.1	12	Arabidopsis thaliana	core promoter element around -30 of transcription start	Common	Common
CsSAUR74	CSS0004746.1	37	Arabidopsis thaliana	core promoter element around -30 of transcription start	Common	Common
CsSAUR74	CSS0004746.1	46	Arabidopsis thaliana	core promoter element around -30 of transcription start	Common	Common
CsSAUR74	CSS0004746.1	52	Helianthus annuus	core promoter element around -30 of transcription start	Common	Common
CsSAUR74	CSS0004746.1	54	Arabidopsis thaliana	core promoter element around -30 of transcription start	Common	Common
CsSAUR74	CSS0004746.1	84	Helianthus annuus	core promoter element around -30 of transcription start	Common	Common
CsSAUR74	CSS0004746.1	85	Arabidopsis thaliana	core promoter element around -30 of transcription start	Common	Common
CsSAUR74	CSS0004746.1	86	Arabidopsis thaliana	core promoter element around -30 of transcription start	Common	Common
CsSAUR74	CSS0004746.1	390	Helianthus annuus	core promoter element around -30 of transcription start	Common	Common
CsSAUR74	CSS0004746.1	391	Arabidopsis thaliana	core promoter element around -30 of transcription start	Common	Common
CsSAUR74	CSS0004746.1	392	Arabidopsis thaliana	core promoter element around -30 of transcription start	Common	Common
CsSAUR74	CSS0004746.1	448	Arabidopsis thaliana	core promoter element around -30 of transcription start	Common	Common
CsSAUR74	CSS0004746.1	497	Arabidopsis thaliana	core promoter element around -30 of transcription start	Common	Common
CsSAUR74	CSS0004746.1	956	Helianthus annuus	core promoter element around -30 of transcription start	Common	Common
CsSAUR74	CSS0004746.1	958	Arabidopsis thaliana	core promoter element around -30 of transcription start	Common	Common
CsSAUR74	CSS0004746.1	982	Oryza sativa	core promoter element around -30 of transcription start	Common	Common
CsSAUR74	CSS0004746.1	985	Helianthus annuus	core promoter element around -30 of transcription start	Common	Common
CsSAUR74	CSS0004746.1	987	Arabidopsis thaliana	core promoter element around -30 of transcription start	Common	Common
CsSAUR74	CSS0004746.1	988	Brassica napus	core promoter element around -30 of transcription start	Common	Common
CsSAUR74	CSS0004746.1	989	Arabidopsis thaliana	core promoter element around -30 of transcription start	Common	Common
CsSAUR74	CSS0004746.1	1254	Brassica napus	core promoter element around -30 of transcription start	Common	Common
CsSAUR74	CSS0004746.1	1255	Arabidopsis thaliana	core promoter element around -30 of transcription start	Common	Common
CsSAUR74	CSS0004746.1	1284	Arabidopsis thaliana	core promoter element around -30 of transcription start	Common	Common
CsSAUR74	CSS0004746.1	1285	Brassica oleracea	core promoter element around -30 of transcription start	Common	Common
CsSAUR74	CSS0004746.1	1286	Arabidopsis thaliana	core promoter element around -30 of transcription start	Common	Common
CsSAUR74	CSS0004746.1	1661	Brassica napus	core promoter element around -30 of transcription start	Common	Common
CsSAUR74	CSS0004746.1	1662	Arabidopsis thaliana	core promoter element around -30 of transcription start	Common	Common
CsSAUR74	CSS0004746.1	1663	Brassica napus	core promoter element around -30 of transcription start	Common	Common
CsSAUR74	CSS0004746.1	1664	Arabidopsis thaliana	core promoter element around -30 of transcription start	Common	Common
CsSAUR74	CSS0004746.1	1665	Brassica oleracea	core promoter element around -30 of transcription start	Common	Common
CsSAUR74	CSS0004746.1	1666	Arabidopsis thaliana	core promoter element around -30 of transcription start	Common	Common
CsSAUR74	CSS0004746.1	1734	Brassica napus	core promoter element around -30 of transcription start	Common	Common
CsSAUR74	CSS0004746.1	1735	Arabidopsis thaliana	core promoter element around -30 of transcription start	Common	Common
CsSAUR74	CSS0004746.1	216	Nicotiana tabacum	cis-acting element involved in salicylic acid responsiveness	Phytohormone	Salicylic acid
CsSAUR60	CSS0005218.1	367	Zea mays	cis-acting regulatory element involved in light responsiveness	Environment	Light
CsSAUR60	CSS0005218.1	516	Arabidopsis thaliana	cis-acting regulatory element involved in light responsiveness	Environment	Light
CsSAUR60	CSS0005218.1	167	Petroselinum crispum	cis-acting regulatory element	Common	Common
CsSAUR60	CSS0005218.1	1204	Arabidopsis thaliana		NA	NA
CsSAUR60	CSS0005218.1	368	Arabidopsis thaliana	cis-acting element involved in the abscisic acid responsiveness	Phytohormone	Abscisic acid
CsSAUR60	CSS0005218.1	514	Hordeum vulgare	cis-acting element involved in the abscisic acid responsiveness	Phytohormone	Abscisic acid
CsSAUR60	CSS0005218.1	517	Arabidopsis thaliana	cis-acting element involved in the abscisic acid responsiveness	Phytohormone	Abscisic acid
CsSAUR60	CSS0005218.1	1770	Arabidopsis thaliana	MYB binding site involved in drought-inducibility	TF	MYB Binding Site
CsSAUR60	CSS0005218.1	566	Avena sativa		NA	NA
CsSAUR60	CSS0005218.1	500	Zea mays	cis-acting regulatory element essential for the anaerobic induction	Environment	Anaerobic
CsSAUR60	CSS0005218.1	1162	Zea mays	cis-acting regulatory element essential for the anaerobic induction	Environment	Anaerobic
CsSAUR60	CSS0005218.1	1484	Zea mays	cis-acting regulatory element essential for the anaerobic induction	Environment	Anaerobic
CsSAUR60	CSS0005218.1	1754	Zea mays	cis-acting regulatory element essential for the anaerobic induction	Environment	Anaerobic
CsSAUR60	CSS0005218.1	346	Brassica oleracea	auxin-responsive element	Phytohormone	Auxin
CsSAUR60	CSS0005218.1	726	Brassica oleracea	auxin-responsive element	Phytohormone	Auxin
CsSAUR60	CSS0005218.1	957	Brassica oleracea	auxin-responsive element	Phytohormone	Auxin
CsSAUR60	CSS0005218.1	352	organism	short_function	Common	Common
CsSAUR60	CSS0005218.1	402	organism	short_function	Common	Common
CsSAUR60	CSS0005218.1	460	organism	short_function	Common	Common
CsSAUR60	CSS0005218.1	513	organism	short_function	Common	Common
CsSAUR60	CSS0005218.1	1289	organism	short_function	Common	Common
CsSAUR60	CSS0005218.1	1592	organism	short_function	Common	Common
CsSAUR60	CSS0005218.1	1789	organism	short_function	Common	Common
CsSAUR60	CSS0005218.1	1885	organism	short_function	Common	Common
CsSAUR60	CSS0005218.1	1332	Arabidopsis thaliana		NA	NA
CsSAUR60	CSS0005218.1	516	Zea mays		NA	NA
CsSAUR60	CSS0005218.1	167	Nicotiana tabacum		NA	NA
CsSAUR60	CSS0005218.1	654	Lycopersicon esculentum	cis-acting regulatory element involved in circadian control	Stage	Circadian
CsSAUR60	CSS0005218.1	885	Lycopersicon esculentum	cis-acting regulatory element involved in circadian control	Stage	Circadian
CsSAUR60	CSS0005218.1	1	Nicotiana glutinosa		NA	NA
CsSAUR60	CSS0005218.1	75	Nicotiana glutinosa		NA	NA
CsSAUR60	CSS0005218.1	255	Nicotiana glutinosa		NA	NA
CsSAUR60	CSS0005218.1	261	Pisum sativum	common cis-acting element in promoter and enhancer regions	Common	Common
CsSAUR60	CSS0005218.1	281	Nicotiana glutinosa		NA	NA
CsSAUR60	CSS0005218.1	287	Nicotiana glutinosa		NA	NA
CsSAUR60	CSS0005218.1	301	Nicotiana glutinosa		NA	NA
CsSAUR60	CSS0005218.1	329	Nicotiana glutinosa		NA	NA
CsSAUR60	CSS0005218.1	396	Nicotiana glutinosa		NA	NA
CsSAUR60	CSS0005218.1	419	Nicotiana glutinosa		NA	NA
CsSAUR60	CSS0005218.1	453	Nicotiana glutinosa		NA	NA
CsSAUR60	CSS0005218.1	617	Arabidopsis thaliana	common cis-acting element in promoter and enhancer regions	Common	Common
CsSAUR60	CSS0005218.1	618	Nicotiana glutinosa		NA	NA
CsSAUR60	CSS0005218.1	644	Arabidopsis thaliana	common cis-acting element in promoter and enhancer regions	Common	Common
CsSAUR60	CSS0005218.1	645	Nicotiana glutinosa		NA	NA
CsSAUR60	CSS0005218.1	651	Nicotiana glutinosa		NA	NA
CsSAUR60	CSS0005218.1	673	Arabidopsis thaliana	common cis-acting element in promoter and enhancer regions	Common	Common
CsSAUR60	CSS0005218.1	674	Nicotiana glutinosa		NA	NA
CsSAUR60	CSS0005218.1	700	Arabidopsis thaliana	common cis-acting element in promoter and enhancer regions	Common	Common
CsSAUR60	CSS0005218.1	701	Nicotiana glutinosa		NA	NA
CsSAUR60	CSS0005218.1	786	Pisum sativum	common cis-acting element in promoter and enhancer regions	Common	Common
CsSAUR60	CSS0005218.1	848	Arabidopsis thaliana	common cis-acting element in promoter and enhancer regions	Common	Common
CsSAUR60	CSS0005218.1	849	Nicotiana glutinosa		NA	NA
CsSAUR60	CSS0005218.1	875	Arabidopsis thaliana	common cis-acting element in promoter and enhancer regions	Common	Common
CsSAUR60	CSS0005218.1	876	Nicotiana glutinosa		NA	NA
CsSAUR60	CSS0005218.1	882	Nicotiana glutinosa		NA	NA
CsSAUR60	CSS0005218.1	904	Arabidopsis thaliana	common cis-acting element in promoter and enhancer regions	Common	Common
CsSAUR60	CSS0005218.1	905	Nicotiana glutinosa		NA	NA
CsSAUR60	CSS0005218.1	931	Arabidopsis thaliana	common cis-acting element in promoter and enhancer regions	Common	Common
CsSAUR60	CSS0005218.1	932	Nicotiana glutinosa		NA	NA
CsSAUR60	CSS0005218.1	1017	Pisum sativum	common cis-acting element in promoter and enhancer regions	Common	Common
CsSAUR60	CSS0005218.1	1293	Nicotiana glutinosa		NA	NA
CsSAUR60	CSS0005218.1	1305	Nicotiana glutinosa		NA	NA
CsSAUR60	CSS0005218.1	1310	Nicotiana glutinosa		NA	NA
CsSAUR60	CSS0005218.1	1367	Pisum sativum	common cis-acting element in promoter and enhancer regions	Common	Common
CsSAUR60	CSS0005218.1	1478	Arabidopsis thaliana	common cis-acting element in promoter and enhancer regions	Common	Common
CsSAUR60	CSS0005218.1	1479	Nicotiana glutinosa		NA	NA
CsSAUR60	CSS0005218.1	1507	Nicotiana glutinosa		NA	NA
CsSAUR60	CSS0005218.1	1525	Nicotiana glutinosa		NA	NA
CsSAUR60	CSS0005218.1	1531	Nicotiana glutinosa		NA	NA
CsSAUR60	CSS0005218.1	1680	Nicotiana glutinosa		NA	NA
CsSAUR60	CSS0005218.1	1743	Arabidopsis thaliana	common cis-acting element in promoter and enhancer regions	Common	Common
CsSAUR60	CSS0005218.1	1796	Arabidopsis thaliana	common cis-acting element in promoter and enhancer regions	Common	Common
CsSAUR60	CSS0005218.1	1797	Nicotiana glutinosa		NA	NA
CsSAUR60	CSS0005218.1	1940	Nicotiana glutinosa		NA	NA
CsSAUR60	CSS0005218.1	431	Arabidopsis thaliana		NA	NA
CsSAUR60	CSS0005218.1	1111	Arabidopsis thaliana		NA	NA
CsSAUR60	CSS0005218.1	1758	Arabidopsis thaliana		NA	NA
CsSAUR60	CSS0005218.1	1624	Oryza sativa	light responsive element	Environment	Light
CsSAUR60	CSS0005218.1	30	Brassica napus	core promoter element around -30 of transcription start	Common	Common
CsSAUR60	CSS0005218.1	31	Arabidopsis thaliana	core promoter element around -30 of transcription start	Common	Common
CsSAUR60	CSS0005218.1	32	Arabidopsis thaliana	core promoter element around -30 of transcription start	Common	Common
CsSAUR60	CSS0005218.1	112	Brassica napus	core promoter element around -30 of transcription start	Common	Common
CsSAUR60	CSS0005218.1	113	Arabidopsis thaliana	core promoter element around -30 of transcription start	Common	Common
CsSAUR60	CSS0005218.1	114	Arabidopsis thaliana	core promoter element around -30 of transcription start	Common	Common
CsSAUR60	CSS0005218.1	246	Arabidopsis thaliana	core promoter element around -30 of transcription start	Common	Common
CsSAUR60	CSS0005218.1	248	Oryza sativa	core promoter element around -30 of transcription start	Common	Common
CsSAUR60	CSS0005218.1	468	Arabidopsis thaliana	core promoter element around -30 of transcription start	Common	Common
CsSAUR60	CSS0005218.1	469	Arabidopsis thaliana	core promoter element around -30 of transcription start	Common	Common
CsSAUR60	CSS0005218.1	528	Helianthus annuus	core promoter element around -30 of transcription start	Common	Common
CsSAUR60	CSS0005218.1	530	Arabidopsis thaliana	core promoter element around -30 of transcription start	Common	Common
CsSAUR60	CSS0005218.1	733	Arabidopsis thaliana	core promoter element around -30 of transcription start	Common	Common
CsSAUR60	CSS0005218.1	736	Brassica napus	core promoter element around -30 of transcription start	Common	Common
CsSAUR60	CSS0005218.1	737	Arabidopsis thaliana	core promoter element around -30 of transcription start	Common	Common
CsSAUR60	CSS0005218.1	738	Arabidopsis thaliana	core promoter element around -30 of transcription start	Common	Common
CsSAUR60	CSS0005218.1	764	Brassica napus	core promoter element around -30 of transcription start	Common	Common
CsSAUR60	CSS0005218.1	765	Arabidopsis thaliana	core promoter element around -30 of transcription start	Common	Common
CsSAUR60	CSS0005218.1	766	Arabidopsis thaliana	core promoter element around -30 of transcription start	Common	Common
CsSAUR60	CSS0005218.1	792	Brassica napus	core promoter element around -30 of transcription start	Common	Common
CsSAUR60	CSS0005218.1	793	Arabidopsis thaliana	core promoter element around -30 of transcription start	Common	Common
CsSAUR60	CSS0005218.1	794	Arabidopsis thaliana	core promoter element around -30 of transcription start	Common	Common
CsSAUR60	CSS0005218.1	964	Arabidopsis thaliana	core promoter element around -30 of transcription start	Common	Common
CsSAUR60	CSS0005218.1	967	Brassica napus	core promoter element around -30 of transcription start	Common	Common
CsSAUR60	CSS0005218.1	968	Arabidopsis thaliana	core promoter element around -30 of transcription start	Common	Common
CsSAUR60	CSS0005218.1	969	Arabidopsis thaliana	core promoter element around -30 of transcription start	Common	Common
CsSAUR60	CSS0005218.1	995	Brassica napus	core promoter element around -30 of transcription start	Common	Common
CsSAUR60	CSS0005218.1	996	Arabidopsis thaliana	core promoter element around -30 of transcription start	Common	Common
CsSAUR60	CSS0005218.1	997	Arabidopsis thaliana	core promoter element around -30 of transcription start	Common	Common
CsSAUR60	CSS0005218.1	1023	Brassica napus	core promoter element around -30 of transcription start	Common	Common
CsSAUR60	CSS0005218.1	1024	Arabidopsis thaliana	core promoter element around -30 of transcription start	Common	Common
CsSAUR60	CSS0005218.1	1025	Arabidopsis thaliana	core promoter element around -30 of transcription start	Common	Common
CsSAUR60	CSS0005218.1	1053	Arabidopsis thaliana	core promoter element around -30 of transcription start	Common	Common
CsSAUR60	CSS0005218.1	1076	Arabidopsis thaliana	core promoter element around -30 of transcription start	Common	Common
CsSAUR60	CSS0005218.1	1079	Brassica napus	core promoter element around -30 of transcription start	Common	Common
CsSAUR60	CSS0005218.1	1080	Arabidopsis thaliana	core promoter element around -30 of transcription start	Common	Common
CsSAUR60	CSS0005218.1	1081	Arabidopsis thaliana	core promoter element around -30 of transcription start	Common	Common
CsSAUR60	CSS0005218.1	1082	Brassica napus	core promoter element around -30 of transcription start	Common	Common
CsSAUR60	CSS0005218.1	1083	Arabidopsis thaliana	core promoter element around -30 of transcription start	Common	Common
CsSAUR60	CSS0005218.1	1195	Arabidopsis thaliana	core promoter element around -30 of transcription start	Common	Common
CsSAUR60	CSS0005218.1	1260	Oryza sativa	core promoter element around -30 of transcription start	Common	Common
CsSAUR60	CSS0005218.1	1264	Helianthus annuus	core promoter element around -30 of transcription start	Common	Common
CsSAUR60	CSS0005218.1	1266	Arabidopsis thaliana	core promoter element around -30 of transcription start	Common	Common
CsSAUR60	CSS0005218.1	1270	Oryza sativa	core promoter element around -30 of transcription start	Common	Common
CsSAUR60	CSS0005218.1	1383	Brassica oleracea	core promoter element around -30 of transcription start	Common	Common
CsSAUR60	CSS0005218.1	1384	Arabidopsis thaliana	core promoter element around -30 of transcription start	Common	Common
CsSAUR60	CSS0005218.1	1422	Arabidopsis thaliana	core promoter element around -30 of transcription start	Common	Common
CsSAUR60	CSS0005218.1	1437	Brassica napus	core promoter element around -30 of transcription start	Common	Common
CsSAUR60	CSS0005218.1	1438	Arabidopsis thaliana	core promoter element around -30 of transcription start	Common	Common
CsSAUR60	CSS0005218.1	1439	Arabidopsis thaliana	core promoter element around -30 of transcription start	Common	Common
CsSAUR60	CSS0005218.1	1440	Brassica napus	core promoter element around -30 of transcription start	Common	Common
CsSAUR60	CSS0005218.1	1441	Arabidopsis thaliana	core promoter element around -30 of transcription start	Common	Common
CsSAUR60	CSS0005218.1	1442	Brassica napus	core promoter element around -30 of transcription start	Common	Common
CsSAUR60	CSS0005218.1	1443	Arabidopsis thaliana	core promoter element around -30 of transcription start	Common	Common
CsSAUR60	CSS0005218.1	1444	Brassica oleracea	core promoter element around -30 of transcription start	Common	Common
CsSAUR60	CSS0005218.1	1445	Arabidopsis thaliana	core promoter element around -30 of transcription start	Common	Common
CsSAUR60	CSS0005218.1	1461	Arabidopsis thaliana	core promoter element around -30 of transcription start	Common	Common
CsSAUR60	CSS0005218.1	1559	Arabidopsis thaliana	core promoter element around -30 of transcription start	Common	Common
CsSAUR60	CSS0005218.1	1860	Arabidopsis thaliana	core promoter element around -30 of transcription start	Common	Common
CsSAUR60	CSS0005218.1	1864	Arabidopsis thaliana	core promoter element around -30 of transcription start	Common	Common
CsSAUR60	CSS0005218.1	1865	Brassica napus	core promoter element around -30 of transcription start	Common	Common
CsSAUR60	CSS0005218.1	1866	Arabidopsis thaliana	core promoter element around -30 of transcription start	Common	Common
CsSAUR60	CSS0005218.1	1868	Arabidopsis thaliana	core promoter element around -30 of transcription start	Common	Common
CsSAUR60	CSS0005218.1	1877	Brassica napus	core promoter element around -30 of transcription start	Common	Common
CsSAUR60	CSS0005218.1	1878	Arabidopsis thaliana	core promoter element around -30 of transcription start	Common	Common
CsSAUR60	CSS0005218.1	516	Zea mays		NA	NA
CsSAUR60	CSS0005218.1	524	Nicotiana tabacum		NA	NA
CsSAUR60	CSS0005218.1	678	Nicotiana tabacum		NA	NA
CsSAUR60	CSS0005218.1	705	Nicotiana tabacum		NA	NA
CsSAUR60	CSS0005218.1	909	Nicotiana tabacum		NA	NA
CsSAUR60	CSS0005218.1	936	Nicotiana tabacum		NA	NA
CsSAUR60	CSS0005218.1	303	Petroselinum crispum	part of a conserved DNA module involved in light responsiveness	Environment	Light
CsSAUR60	CSS0005218.1	410	Petroselinum crispum	part of a conserved DNA module involved in light responsiveness	Environment	Light
CsSAUR60	CSS0005218.1	167	Petroselinum hortense		NA	NA
CsSAUR60	CSS0005218.1	1622	Arabidopsis thaliana		NA	NA
CsSAUR60	CSS0005218.1	1811	Arabidopsis thaliana		NA	NA
CsSAUR60	CSS0005218.1	335	Nicotiana tabacum	cis-acting regulatory element involved in auxin responsiveness	Phytohormone	Auxin
CsSAUR60	CSS0005218.1	1404	Arabidopsis thaliana	part of a light responsive element	Environment	Light
CsSAUR60	CSS0005218.1	1081	Arabidopsis thaliana		NA	NA
CsSAUR60	CSS0005218.1	1439	Arabidopsis thaliana		NA	NA
CsSAUR60	CSS0005218.1	1441	Arabidopsis thaliana		NA	NA
CsSAUR60	CSS0005218.1	1443	Arabidopsis thaliana		NA	NA
CsSAUR60	CSS0005218.1	1864	Arabidopsis thaliana		NA	NA
CsSAUR60	CSS0005218.1	1866	Arabidopsis thaliana		NA	NA
CsSAUR60	CSS0005218.1	86	Arabidopsis thaliana		NA	NA
CsSAUR60	CSS0005218.1	524	Arabidopsis thaliana		NA	NA
CsSAUR60	CSS0005218.1	678	Arabidopsis thaliana		NA	NA
CsSAUR60	CSS0005218.1	705	Arabidopsis thaliana		NA	NA
CsSAUR60	CSS0005218.1	909	Arabidopsis thaliana		NA	NA
CsSAUR60	CSS0005218.1	936	Arabidopsis thaliana		NA	NA
CsSAUR60	CSS0005218.1	1130	Nicotiana glutinos		NA	NA
CsSAUR60	CSS0005218.1	9	Petroselinum hortense		NA	NA
CsSAUR60	CSS0005218.1	184	Petroselinum hortense		NA	NA
CsSAUR60	CSS0005218.1	1213	Petroselinum hortense		NA	NA
CsSAUR60	CSS0005218.1	1249	Petroselinum hortense		NA	NA
CsSAUR60	CSS0005218.1	1289	Petroselinum hortense		NA	NA
CsSAUR60	CSS0005218.1	1349	Petroselinum hortense		NA	NA
CsSAUR60	CSS0005218.1	1377	Petroselinum hortense		NA	NA
CsSAUR60	CSS0005218.1	677	Brassica oleracea	gibberellin-responsive element	Phytohormone	Gibberellin
CsSAUR60	CSS0005218.1	704	Brassica oleracea	gibberellin-responsive element	Phytohormone	Gibberellin
CsSAUR60	CSS0005218.1	908	Brassica oleracea	gibberellin-responsive element	Phytohormone	Gibberellin
CsSAUR60	CSS0005218.1	935	Brassica oleracea	gibberellin-responsive element	Phytohormone	Gibberellin
CsSAUR60	CSS0005218.1	1847	Zea mays	cis-acting regulatory element involved in zein metabolism regulation	Phytohormone	Zein
CsSAUR60	CSS0005218.1	1770	Arabidopsis thaliana		NA	NA
CsSAUR60	CSS0005218.1	1334	Pisum sativum		NA	NA
CsSAUR21	CSS0006086.1	947	Arabidopsis thaliana	MYB binding site involved in drought-inducibility	TF	MYB Binding Site
CsSAUR21	CSS0006086.1	1456	Brassica oleracea	auxin-responsive element	Phytohormone	Auxin
CsSAUR21	CSS0006086.1	61	organism	short_function	Common	Common
CsSAUR21	CSS0006086.1	171	organism	short_function	Common	Common
CsSAUR21	CSS0006086.1	239	organism	short_function	Common	Common
CsSAUR21	CSS0006086.1	298	organism	short_function	Common	Common
CsSAUR21	CSS0006086.1	747	organism	short_function	Common	Common
CsSAUR21	CSS0006086.1	754	organism	short_function	Common	Common
CsSAUR21	CSS0006086.1	801	organism	short_function	Common	Common
CsSAUR21	CSS0006086.1	912	organism	short_function	Common	Common
CsSAUR21	CSS0006086.1	1311	organism	short_function	Common	Common
CsSAUR21	CSS0006086.1	1399	organism	short_function	Common	Common
CsSAUR21	CSS0006086.1	1414	organism	short_function	Common	Common
CsSAUR21	CSS0006086.1	1813	organism	short_function	Common	Common
CsSAUR21	CSS0006086.1	1848	organism	short_function	Common	Common
CsSAUR21	CSS0006086.1	1982	organism	short_function	Common	Common
CsSAUR21	CSS0006086.1	1994	organism	short_function	Common	Common
CsSAUR21	CSS0006086.1	82	Arabidopsis thaliana	cis-acting regulatory element involved in light responsiveness	Environment	Light
CsSAUR21	CSS0006086.1	84	Arabidopsis thaliana	cis-acting regulatory element involved in light responsiveness	Environment	Light
CsSAUR21	CSS0006086.1	1232	Arabidopsis thaliana	cis-acting regulatory element involved in light responsiveness	Environment	Light
CsSAUR21	CSS0006086.1	902	Arabidopsis thaliana	part of a light responsive element	Environment	Light
CsSAUR21	CSS0006086.1	82	Oryza sativa	cis-acting element involved in the abscisic acid responsiveness	Phytohormone	Abscisic acid
CsSAUR21	CSS0006086.1	84	Arabidopsis thaliana	cis-acting element involved in the abscisic acid responsiveness	Phytohormone	Abscisic acid
CsSAUR21	CSS0006086.1	85	Arabidopsis thaliana	cis-acting element involved in the abscisic acid responsiveness	Phytohormone	Abscisic acid
CsSAUR21	CSS0006086.1	771	Arabidopsis thaliana	cis-acting element involved in the abscisic acid responsiveness	Phytohormone	Abscisic acid
CsSAUR21	CSS0006086.1	938	Arabidopsis thaliana	cis-acting element involved in the abscisic acid responsiveness	Phytohormone	Abscisic acid
CsSAUR21	CSS0006086.1	1209	Arabidopsis thaliana	cis-acting element involved in the abscisic acid responsiveness	Phytohormone	Abscisic acid
CsSAUR21	CSS0006086.1	1233	Arabidopsis thaliana	cis-acting element involved in the abscisic acid responsiveness	Phytohormone	Abscisic acid
CsSAUR21	CSS0006086.1	25	Arabidopsis thaliana		NA	NA
CsSAUR21	CSS0006086.1	262	Arabidopsis thaliana		NA	NA
CsSAUR21	CSS0006086.1	140	Arabidopsis thaliana		NA	NA
CsSAUR21	CSS0006086.1	275	Arabidopsis thaliana		NA	NA
CsSAUR21	CSS0006086.1	1027	Arabidopsis thaliana		NA	NA
CsSAUR21	CSS0006086.1	1656	Arabidopsis thaliana		NA	NA
CsSAUR21	CSS0006086.1	23	Arabidopsis thaliana	common cis-acting element in promoter and enhancer regions	Common	Common
CsSAUR21	CSS0006086.1	69	Arabidopsis thaliana	common cis-acting element in promoter and enhancer regions	Common	Common
CsSAUR21	CSS0006086.1	70	Nicotiana glutinosa		NA	NA
CsSAUR21	CSS0006086.1	140	Pisum sativum	common cis-acting element in promoter and enhancer regions	Common	Common
CsSAUR21	CSS0006086.1	210	Nicotiana glutinosa		NA	NA
CsSAUR21	CSS0006086.1	265	Arabidopsis thaliana	common cis-acting element in promoter and enhancer regions	Common	Common
CsSAUR21	CSS0006086.1	266	Nicotiana glutinosa		NA	NA
CsSAUR21	CSS0006086.1	364	Arabidopsis thaliana	common cis-acting element in promoter and enhancer regions	Common	Common
CsSAUR21	CSS0006086.1	377	Pisum sativum	common cis-acting element in promoter and enhancer regions	Common	Common
CsSAUR21	CSS0006086.1	421	Nicotiana glutinosa		NA	NA
CsSAUR21	CSS0006086.1	574	Nicotiana glutinosa		NA	NA
CsSAUR21	CSS0006086.1	833	Nicotiana glutinosa		NA	NA
CsSAUR21	CSS0006086.1	893	Nicotiana glutinosa		NA	NA
CsSAUR21	CSS0006086.1	931	Nicotiana glutinosa		NA	NA
CsSAUR21	CSS0006086.1	1033	Nicotiana glutinosa		NA	NA
CsSAUR21	CSS0006086.1	1046	Nicotiana glutinosa		NA	NA
CsSAUR21	CSS0006086.1	1100	Arabidopsis thaliana	common cis-acting element in promoter and enhancer regions	Common	Common
CsSAUR21	CSS0006086.1	1170	Nicotiana glutinosa		NA	NA
CsSAUR21	CSS0006086.1	1240	Pisum sativum	common cis-acting element in promoter and enhancer regions	Common	Common
CsSAUR21	CSS0006086.1	1245	Nicotiana glutinosa		NA	NA
CsSAUR21	CSS0006086.1	1305	Nicotiana glutinosa		NA	NA
CsSAUR21	CSS0006086.1	1316	Pisum sativum	common cis-acting element in promoter and enhancer regions	Common	Common
CsSAUR21	CSS0006086.1	1479	Nicotiana glutinosa		NA	NA
CsSAUR21	CSS0006086.1	1491	Nicotiana glutinosa		NA	NA
CsSAUR21	CSS0006086.1	1507	Nicotiana glutinosa		NA	NA
CsSAUR21	CSS0006086.1	1512	Pisum sativum	common cis-acting element in promoter and enhancer regions	Common	Common
CsSAUR21	CSS0006086.1	1515	Nicotiana glutinosa		NA	NA
CsSAUR21	CSS0006086.1	1541	Nicotiana glutinosa		NA	NA
CsSAUR21	CSS0006086.1	1549	Nicotiana glutinosa		NA	NA
CsSAUR21	CSS0006086.1	1566	Pisum sativum	common cis-acting element in promoter and enhancer regions	Common	Common
CsSAUR21	CSS0006086.1	1673	Pisum sativum	common cis-acting element in promoter and enhancer regions	Common	Common
CsSAUR21	CSS0006086.1	1681	Pisum sativum	common cis-acting element in promoter and enhancer regions	Common	Common
CsSAUR21	CSS0006086.1	1778	Nicotiana glutinosa		NA	NA
CsSAUR21	CSS0006086.1	1790	Pisum sativum	common cis-acting element in promoter and enhancer regions	Common	Common
CsSAUR21	CSS0006086.1	1828	Nicotiana glutinosa		NA	NA
CsSAUR21	CSS0006086.1	1842	Nicotiana glutinosa		NA	NA
CsSAUR21	CSS0006086.1	1854	Nicotiana glutinosa		NA	NA
CsSAUR21	CSS0006086.1	1859	Nicotiana glutinosa		NA	NA
CsSAUR21	CSS0006086.1	1948	Nicotiana glutinosa		NA	NA
CsSAUR21	CSS0006086.1	1956	Nicotiana glutinosa		NA	NA
CsSAUR21	CSS0006086.1	1973	Nicotiana glutinosa		NA	NA
CsSAUR21	CSS0006086.1	434	Brassica napus	core promoter element around -30 of transcription start	Common	Common
CsSAUR21	CSS0006086.1	435	Arabidopsis thaliana	core promoter element around -30 of transcription start	Common	Common
CsSAUR21	CSS0006086.1	453	Brassica napus	core promoter element around -30 of transcription start	Common	Common
CsSAUR21	CSS0006086.1	454	Arabidopsis thaliana	core promoter element around -30 of transcription start	Common	Common
CsSAUR21	CSS0006086.1	455	Arabidopsis thaliana	core promoter element around -30 of transcription start	Common	Common
CsSAUR21	CSS0006086.1	456	Brassica oleracea	core promoter element around -30 of transcription start	Common	Common
CsSAUR21	CSS0006086.1	457	Arabidopsis thaliana	core promoter element around -30 of transcription start	Common	Common
CsSAUR21	CSS0006086.1	473	Arabidopsis thaliana	core promoter element around -30 of transcription start	Common	Common
CsSAUR21	CSS0006086.1	854	Brassica napus	core promoter element around -30 of transcription start	Common	Common
CsSAUR21	CSS0006086.1	855	Arabidopsis thaliana	core promoter element around -30 of transcription start	Common	Common
CsSAUR21	CSS0006086.1	856	Arabidopsis thaliana	core promoter element around -30 of transcription start	Common	Common
CsSAUR21	CSS0006086.1	961	Arabidopsis thaliana	core promoter element around -30 of transcription start	Common	Common
CsSAUR21	CSS0006086.1	962	Arabidopsis thaliana	core promoter element around -30 of transcription start	Common	Common
CsSAUR21	CSS0006086.1	1014	Brassica napus	core promoter element around -30 of transcription start	Common	Common
CsSAUR21	CSS0006086.1	1015	Arabidopsis thaliana	core promoter element around -30 of transcription start	Common	Common
CsSAUR21	CSS0006086.1	1052	Brassica napus	core promoter element around -30 of transcription start	Common	Common
CsSAUR21	CSS0006086.1	1053	Arabidopsis thaliana	core promoter element around -30 of transcription start	Common	Common
CsSAUR21	CSS0006086.1	1054	Arabidopsis thaliana	core promoter element around -30 of transcription start	Common	Common
CsSAUR21	CSS0006086.1	1055	Brassica oleracea	core promoter element around -30 of transcription start	Common	Common
CsSAUR21	CSS0006086.1	1056	Arabidopsis thaliana	core promoter element around -30 of transcription start	Common	Common
CsSAUR21	CSS0006086.1	1191	Arabidopsis thaliana	core promoter element around -30 of transcription start	Common	Common
CsSAUR21	CSS0006086.1	1197	Arabidopsis thaliana	core promoter element around -30 of transcription start	Common	Common
CsSAUR21	CSS0006086.1	1248	Pisum sativum	core promoter element around -30 of transcription start	Common	Common
CsSAUR21	CSS0006086.1	1249	Helianthus annuus	core promoter element around -30 of transcription start	Common	Common
CsSAUR21	CSS0006086.1	1250	Arabidopsis thaliana	core promoter element around -30 of transcription start	Common	Common
CsSAUR21	CSS0006086.1	1251	Arabidopsis thaliana	core promoter element around -30 of transcription start	Common	Common
CsSAUR21	CSS0006086.1	1252	Brassica napus	core promoter element around -30 of transcription start	Common	Common
CsSAUR21	CSS0006086.1	1253	Arabidopsis thaliana	core promoter element around -30 of transcription start	Common	Common
CsSAUR21	CSS0006086.1	1254	Brassica napus	core promoter element around -30 of transcription start	Common	Common
CsSAUR21	CSS0006086.1	1255	Arabidopsis thaliana	core promoter element around -30 of transcription start	Common	Common
CsSAUR21	CSS0006086.1	1256	Brassica oleracea	core promoter element around -30 of transcription start	Common	Common
CsSAUR21	CSS0006086.1	1257	Arabidopsis thaliana	core promoter element around -30 of transcription start	Common	Common
CsSAUR21	CSS0006086.1	1341	Brassica napus	core promoter element around -30 of transcription start	Common	Common
CsSAUR21	CSS0006086.1	1342	Arabidopsis thaliana	core promoter element around -30 of transcription start	Common	Common
CsSAUR21	CSS0006086.1	1343	Arabidopsis thaliana	core promoter element around -30 of transcription start	Common	Common
CsSAUR21	CSS0006086.1	1418	Brassica napus	core promoter element around -30 of transcription start	Common	Common
CsSAUR21	CSS0006086.1	1419	Arabidopsis thaliana	core promoter element around -30 of transcription start	Common	Common
CsSAUR21	CSS0006086.1	1428	Arabidopsis thaliana	core promoter element around -30 of transcription start	Common	Common
CsSAUR21	CSS0006086.1	1430	Arabidopsis thaliana	core promoter element around -30 of transcription start	Common	Common
[truncated: 13,563 more rows]
