# Supplementary material for: Genome-wide identification of SMALL AUXIN UP RNA (SAUR) gene family and its expression profiles in response to abiotic stress and auxin in tea plants ( Camellia sinensis )
Source: PeerJ journal article supplement (doi:10.7717/peerj.20681), 2026-01-30
Supplement: Table_S7.xlsx [file Table_S7.xlsx]

## Sheet:  
Table S7. Auxin-responsive cis-elements identified in the promoters of CsSAUR genes
Gene name	Start	End	Cis-acting elements
CsSAUR3	1745	1755	AuxRR-core
CsSAUR3	157	167	TGA-element
CsSAUR3	163	173	TGA-element
CsSAUR3	199	209	TGA-element
CsSAUR3	205	215	TGA-element
CsSAUR30	927	937	TGA-element
CsSAUR4	1728	1738	AuxRR-core
CsSAUR6	139	149	TGA-element
CsSAUR6	563	573	TGA-element
CsSAUR6	1865	1875	TGA-element
CsSAUR10	761	771	AuxRR-core
CsSAUR16	1964	1974	TGA-element
CsSAUR17	1000	1010	AuxRR-core
CsSAUR18	1554	1564	TGA-element
CsSAUR21	1456	1466	TGA-element
CsSAUR22	1135	1145	TGA-element
CsSAUR26	728	738	AuxRE
CsSAUR28	1718	1728	AuxRR-core
CsSAUR29	1726	1736	AuxRR-core
CsSAUR35	610	620	AuxRR-core
CsSAUR36	864	874	AuxRR-core
CsSAUR36	1719	1729	AuxRR-core
CsSAUR37	756	766	AuxRR-core
CsSAUR40	286	296	TGA-element
CsSAUR42	566	576	AuxRR-core
CsSAUR42	1906	1916	AuxRR-core
CsSAUR42	397	407	TGA-element
CsSAUR42	403	413	TGA-element
CsSAUR43	185	195	AuxRR-core
CsSAUR43	1899	1909	AuxRR-core
CsSAUR50	1719	1729	AuxRR-core
CsSAUR55	1215	1225	TGA-element
CsSAUR55	1221	1231	TGA-element
CsSAUR55	1257	1267	TGA-element
CsSAUR55	1263	1273	TGA-element
CsSAUR56	756	766	AuxRR-core
CsSAUR57	1718	1728	AuxRR-core
CsSAUR58	1856	1866	AuxRR-core
CsSAUR60	346	356	TGA-element
CsSAUR60	726	736	TGA-element
CsSAUR60	957	967	TGA-element
CsSAUR60	335	345	AuxRR-core
CsSAUR61	731	741	AuxRE
CsSAUR64	1136	1146	TGA-element
CsSAUR65	1456	1466	TGA-element
CsSAUR67	273	283	TGA-element
CsSAUR68	500	510	AuxRR-core
CsSAUR70	287	297	AuxRR-core
CsSAUR71	1389	1399	TGA-element
CsSAUR71	426	436	AuxRR-core
CsSAUR75	52	62	TGA-element
CsSAUR76	1684	1694	AuxRR-core
CsSAUR76	542	552	TGA-element
CsSAUR76	735	745	TGA-element
CsSAUR79	560	570	TGA-element
CsSAUR79	753	763	TGA-element
CsSAUR79	1684	1694	AuxRR-core
CsSAUR82	476	486	TGA-element
CsSAUR86	1826	1836	TGA-element
CsSAUR88	224	234	AuxRR-core
CsSAUR89	1402	1412	TGA-element
CsSAUR89	1471	1481	AuxRR-core
CsSAUR90	1460	1470	AuxRR-core
CsSAUR90	1388	1398	TGA-element
CsSAUR95	1232	1242	AuxRR-core
CsSAUR97	1362	1372	TGA-element
