# Supplementary material for: Genome-wide identification of SMALL AUXIN UP RNA (SAUR) gene family and its expression profiles in response to abiotic stress and auxin in tea plants ( Camellia sinensis )
Source: PeerJ journal article supplement (doi:10.7717/peerj.20681), 2026-01-30
Supplement: Table_S8.xlsx [file Table_S8.xlsx]

## Sheet:  
Table S8. Stress-responsive cis-elements identified in the promoters of CsSAUR genes
Gene name	Start	End	Cis-acting elements
CsSAUR1	204	249	MeJA-responsiveness
CsSAUR1	159	208	defense and stress responsiveness
CsSAUR1	1632	1681	defense and stress responsiveness
CsSAUR1	204	249	MeJA-responsiveness
CsSAUR10	1092	1138	MYB binding site involved in drought-inducibility
CsSAUR12	1171	1216	MeJA-responsiveness
CsSAUR12	1326	1371	MeJA-responsiveness
CsSAUR12	1329	1374	MeJA-responsiveness
CsSAUR12	1171	1216	MeJA-responsiveness
CsSAUR12	1326	1371	MeJA-responsiveness
CsSAUR12	1329	1374	MeJA-responsiveness
CsSAUR13	809	855	low-temperature responsiveness
CsSAUR13	703	748	MeJA-responsiveness
CsSAUR13	703	748	MeJA-responsiveness
CsSAUR13	36	82	MYB binding site involved in drought-inducibility
CsSAUR13	232	278	MYB binding site involved in drought-inducibility
CsSAUR14	808	854	low-temperature responsiveness
CsSAUR14	232	278	MYB binding site involved in drought-inducibility
CsSAUR14	702	747	MeJA-responsiveness
CsSAUR14	702	747	MeJA-responsiveness
CsSAUR15	810	856	low-temperature responsiveness
CsSAUR15	704	749	MeJA-responsiveness
CsSAUR15	704	749	MeJA-responsiveness
CsSAUR15	235	281	MYB binding site involved in drought-inducibility
CsSAUR16	514	559	MeJA-responsiveness
CsSAUR16	514	559	MeJA-responsiveness
CsSAUR16	1043	1089	low-temperature responsiveness
CsSAUR17	1566	1615	defense and stress responsiveness
CsSAUR19	312	358	MYB binding site involved in drought-inducibility
CsSAUR19	223	268	MeJA-responsiveness
CsSAUR19	223	268	MeJA-responsiveness
CsSAUR2	848	894	low-temperature responsiveness
CsSAUR2	1445	1491	MYB binding site involved in drought-inducibility
CsSAUR2	1858	1904	MYB binding site involved in drought-inducibility
CsSAUR20	1318	1364	MYB binding site involved in drought-inducibility
CsSAUR21	1147	1192	MeJA-responsiveness
CsSAUR21	1270	1315	MeJA-responsiveness
CsSAUR21	1523	1568	MeJA-responsiveness
CsSAUR21	1147	1192	MeJA-responsiveness
CsSAUR21	1270	1315	MeJA-responsiveness
CsSAUR21	1523	1568	MeJA-responsiveness
CsSAUR21	927	973	MYB binding site involved in drought-inducibility
CsSAUR22	4	53	defense and stress responsiveness
CsSAUR22	1782	1827	MeJA-responsiveness
CsSAUR22	1782	1827	MeJA-responsiveness
CsSAUR23	1023	1072	defense and stress responsiveness
CsSAUR23	1312	1358	MYB binding site involved in drought-inducibility
CsSAUR23	1513	1559	MYB binding site involved in drought-inducibility
CsSAUR24	1498	1544	MYB binding site involved in drought-inducibility
CsSAUR24	1544	1590	MYB binding site involved in drought-inducibility
CsSAUR25	432	478	MYB binding site involved in drought-inducibility
CsSAUR25	551	597	MYB binding site involved in drought-inducibility
CsSAUR25	773	818	MeJA-responsiveness
CsSAUR25	773	818	MeJA-responsiveness
CsSAUR26	476	521	MeJA-responsiveness
CsSAUR26	632	677	MeJA-responsiveness
CsSAUR26	653	698	MeJA-responsiveness
CsSAUR26	913	958	MeJA-responsiveness
CsSAUR26	986	1031	MeJA-responsiveness
CsSAUR26	476	521	MeJA-responsiveness
CsSAUR26	632	677	MeJA-responsiveness
CsSAUR26	653	698	MeJA-responsiveness
CsSAUR26	913	958	MeJA-responsiveness
CsSAUR26	986	1031	MeJA-responsiveness
CsSAUR26	1000	1046	MYB binding site involved in drought-inducibility
CsSAUR26	1385	1431	MYB binding site involved in drought-inducibility
CsSAUR26	1468	1514	MYB binding site involved in drought-inducibility
CsSAUR26	1649	1695	MYB binding site involved in drought-inducibility
CsSAUR27	1350	1395	MeJA-responsiveness
CsSAUR27	5	54	defense and stress responsiveness
CsSAUR27	1350	1395	MeJA-responsiveness
CsSAUR27	64	110	MYB binding site involved in drought-inducibility
CsSAUR27	1405	1451	MYB binding site involved in drought-inducibility
CsSAUR27	1451	1497	MYB binding site involved in drought-inducibility
CsSAUR28	181	230	defense and stress responsiveness
CsSAUR29	617	666	defense and stress responsiveness
CsSAUR29	675	721	MYB binding site involved in drought-inducibility
CsSAUR30	963	1008	MeJA-responsiveness
CsSAUR30	1735	1784	defense and stress responsiveness
CsSAUR30	963	1008	MeJA-responsiveness
CsSAUR30	364	410	MYB binding site involved in drought-inducibility
CsSAUR30	1423	1469	MYB binding site involved in drought-inducibility
CsSAUR31	1085	1134	defense and stress responsiveness
CsSAUR31	1212	1258	low-temperature responsiveness
CsSAUR32	1207	1253	low-temperature responsiveness
CsSAUR32	273	318	MeJA-responsiveness
CsSAUR32	1719	1764	MeJA-responsiveness
CsSAUR32	593	642	defense and stress responsiveness
CsSAUR32	1080	1129	defense and stress responsiveness
CsSAUR32	273	318	MeJA-responsiveness
CsSAUR32	1719	1764	MeJA-responsiveness
CsSAUR33	849	895	MYB binding site involved in drought-inducibility
CsSAUR33	1689	1735	MYB binding site involved in drought-inducibility
CsSAUR34	1432	1478	MYB binding site involved in drought-inducibility
CsSAUR34	559	604	MeJA-responsiveness
CsSAUR34	234	283	defense and stress responsiveness
CsSAUR34	559	604	MeJA-responsiveness
CsSAUR35	1971	2017	MYB binding site involved in drought-inducibility
CsSAUR36	240	286	MYB binding site involved in drought-inducibility
CsSAUR36	1440	1486	MYB binding site involved in drought-inducibility
CsSAUR37	1170	1215	MeJA-responsiveness
CsSAUR37	1170	1215	MeJA-responsiveness
CsSAUR37	1470	1516	MYB binding site involved in drought-inducibility
CsSAUR38	1213	1259	low-temperature responsiveness
CsSAUR38	1719	1764	MeJA-responsiveness
CsSAUR38	614	663	defense and stress responsiveness
CsSAUR38	1086	1135	defense and stress responsiveness
CsSAUR38	1719	1764	MeJA-responsiveness
CsSAUR39	1603	1648	MeJA-responsiveness
CsSAUR39	1603	1648	MeJA-responsiveness
CsSAUR39	1689	1735	MYB binding site involved in drought-inducibility
CsSAUR40	560	605	MeJA-responsiveness
CsSAUR40	1520	1565	MeJA-responsiveness
CsSAUR40	560	605	MeJA-responsiveness
CsSAUR40	1520	1565	MeJA-responsiveness
CsSAUR40	360	406	MYB binding site involved in drought-inducibility
CsSAUR40	1433	1479	MYB binding site involved in drought-inducibility
CsSAUR41	1767	1812	MeJA-responsiveness
CsSAUR41	1767	1812	MeJA-responsiveness
CsSAUR43	322	367	MeJA-responsiveness
CsSAUR43	1792	1837	MeJA-responsiveness
CsSAUR43	322	367	MeJA-responsiveness
CsSAUR43	1792	1837	MeJA-responsiveness
CsSAUR43	677	723	low-temperature responsiveness
CsSAUR44	767	813	low-temperature responsiveness
CsSAUR45	1701	1746	MeJA-responsiveness
CsSAUR45	1767	1812	MeJA-responsiveness
CsSAUR45	1701	1746	MeJA-responsiveness
CsSAUR45	1767	1812	MeJA-responsiveness
CsSAUR46	569	614	MeJA-responsiveness
CsSAUR46	569	614	MeJA-responsiveness
CsSAUR46	1433	1479	MYB binding site involved in drought-inducibility
CsSAUR47	477	522	MeJA-responsiveness
CsSAUR47	477	522	MeJA-responsiveness
CsSAUR47	1690	1736	MYB binding site involved in drought-inducibility
CsSAUR48	22	68	MYB binding site involved in drought-inducibility
CsSAUR48	1719	1764	MeJA-responsiveness
CsSAUR48	1719	1764	MeJA-responsiveness
CsSAUR48	593	642	defense and stress responsiveness
CsSAUR48	1082	1131	defense and stress responsiveness
CsSAUR49	37	82	MeJA-responsiveness
CsSAUR49	315	360	MeJA-responsiveness
CsSAUR49	37	82	MeJA-responsiveness
CsSAUR49	315	360	MeJA-responsiveness
CsSAUR49	272	318	MYB binding site involved in drought-inducibility
CsSAUR49	1500	1546	MYB binding site involved in drought-inducibility
CsSAUR5	1908	1953	MeJA-responsiveness
CsSAUR5	1908	1953	MeJA-responsiveness
CsSAUR5	1743	1789	low-temperature responsiveness
CsSAUR50	374	420	MYB binding site involved in drought-inducibility
CsSAUR51	1971	2017	MYB binding site involved in drought-inducibility
CsSAUR51	1388	1433	MeJA-responsiveness
CsSAUR51	1388	1433	MeJA-responsiveness
CsSAUR52	1431	1477	MYB binding site involved in drought-inducibility
CsSAUR52	558	603	MeJA-responsiveness
CsSAUR52	558	603	MeJA-responsiveness
CsSAUR52	233	282	defense and stress responsiveness
CsSAUR53	848	894	MYB binding site involved in drought-inducibility
CsSAUR53	1689	1735	MYB binding site involved in drought-inducibility
CsSAUR54	274	319	MeJA-responsiveness
CsSAUR54	861	906	MeJA-responsiveness
CsSAUR54	594	643	defense and stress responsiveness
CsSAUR54	1081	1130	defense and stress responsiveness
CsSAUR54	274	319	MeJA-responsiveness
CsSAUR54	861	906	MeJA-responsiveness
CsSAUR54	1208	1254	low-temperature responsiveness
CsSAUR55	1039	1085	low-temperature responsiveness
CsSAUR55	1719	1764	MeJA-responsiveness
CsSAUR55	912	961	defense and stress responsiveness
CsSAUR55	1719	1764	MeJA-responsiveness
CsSAUR56	688	734	low-temperature responsiveness
CsSAUR56	1735	1784	defense and stress responsiveness
CsSAUR56	1424	1470	MYB binding site involved in drought-inducibility
CsSAUR56	1470	1516	MYB binding site involved in drought-inducibility
CsSAUR57	192	241	defense and stress responsiveness
CsSAUR58	745	794	defense and stress responsiveness
CsSAUR58	803	849	MYB binding site involved in drought-inducibility
CsSAUR59	72	117	MeJA-responsiveness
CsSAUR59	1349	1394	MeJA-responsiveness
CsSAUR59	72	117	MeJA-responsiveness
CsSAUR59	1349	1394	MeJA-responsiveness
CsSAUR59	442	488	MYB binding site involved in drought-inducibility
CsSAUR59	1404	1450	MYB binding site involved in drought-inducibility
CsSAUR59	1450	1496	MYB binding site involved in drought-inducibility
CsSAUR6	1396	1442	low-temperature responsiveness
CsSAUR60	1750	1796	MYB binding site involved in drought-inducibility
CsSAUR61	1002	1048	MYB binding site involved in drought-inducibility
CsSAUR61	1387	1433	MYB binding site involved in drought-inducibility
CsSAUR61	1471	1517	MYB binding site involved in drought-inducibility
CsSAUR61	1652	1698	MYB binding site involved in drought-inducibility
CsSAUR61	635	680	MeJA-responsiveness
CsSAUR61	915	960	MeJA-responsiveness
CsSAUR61	988	1033	MeJA-responsiveness
CsSAUR61	635	680	MeJA-responsiveness
CsSAUR61	915	960	MeJA-responsiveness
CsSAUR61	988	1033	MeJA-responsiveness
CsSAUR62	772	817	MeJA-responsiveness
CsSAUR62	772	817	MeJA-responsiveness
CsSAUR62	431	477	MYB binding site involved in drought-inducibility
CsSAUR62	550	596	MYB binding site involved in drought-inducibility
CsSAUR63	1497	1543	MYB binding site involved in drought-inducibility
CsSAUR63	1543	1589	MYB binding site involved in drought-inducibility
CsSAUR64	1785	1830	MeJA-responsiveness
CsSAUR64	1785	1830	MeJA-responsiveness
CsSAUR65	1147	1192	MeJA-responsiveness
CsSAUR65	1523	1568	MeJA-responsiveness
CsSAUR65	1147	1192	MeJA-responsiveness
CsSAUR65	1523	1568	MeJA-responsiveness
CsSAUR65	929	975	MYB binding site involved in drought-inducibility
CsSAUR66	1361	1406	MeJA-responsiveness
CsSAUR66	1361	1406	MeJA-responsiveness
CsSAUR66	1552	1598	MYB binding site involved in drought-inducibility
CsSAUR67	842	887	MeJA-responsiveness
CsSAUR67	842	887	MeJA-responsiveness
CsSAUR68	659	704	MeJA-responsiveness
CsSAUR68	1034	1079	MeJA-responsiveness
CsSAUR68	9	58	defense and stress responsiveness
CsSAUR68	659	704	MeJA-responsiveness
CsSAUR68	1034	1079	MeJA-responsiveness
CsSAUR68	176	222	MYB binding site involved in drought-inducibility
CsSAUR68	1493	1539	MYB binding site involved in drought-inducibility
CsSAUR69	807	852	MeJA-responsiveness
CsSAUR69	807	852	MeJA-responsiveness
CsSAUR69	425	471	MYB binding site involved in drought-inducibility
CsSAUR7	117	163	MYB binding site involved in drought-inducibility
CsSAUR7	1236	1282	MYB binding site involved in drought-inducibility
CsSAUR7	1973	2018	MeJA-responsiveness
CsSAUR7	220	269	defense and stress responsiveness
CsSAUR7	1411	1460	defense and stress responsiveness
CsSAUR7	1973	2018	MeJA-responsiveness
CsSAUR73	109	155	MYB binding site involved in drought-inducibility
CsSAUR73	1706	1755	defense and stress responsiveness
CsSAUR73	1917	1962	MeJA-responsiveness
CsSAUR73	1917	1962	MeJA-responsiveness
CsSAUR74	708	757	defense and stress responsiveness
CsSAUR74	1880	1926	MYB binding site involved in drought-inducibility
CsSAUR75	52	97	MeJA-responsiveness
CsSAUR75	124	169	MeJA-responsiveness
CsSAUR75	1963	2008	MeJA-responsiveness
CsSAUR75	52	97	MeJA-responsiveness
CsSAUR75	124	169	MeJA-responsiveness
CsSAUR75	1963	2008	MeJA-responsiveness
CsSAUR76	969	1015	low-temperature responsiveness
CsSAUR76	311	356	MeJA-responsiveness
CsSAUR76	695	740	MeJA-responsiveness
CsSAUR76	1935	1980	MeJA-responsiveness
CsSAUR76	311	356	MeJA-responsiveness
CsSAUR76	695	740	MeJA-responsiveness
CsSAUR76	1935	1980	MeJA-responsiveness
CsSAUR77	197	246	defense and stress responsiveness
CsSAUR77	624	669	MeJA-responsiveness
CsSAUR77	1144	1189	MeJA-responsiveness
CsSAUR77	624	669	MeJA-responsiveness
CsSAUR77	1144	1189	MeJA-responsiveness
CsSAUR77	1359	1405	low-temperature responsiveness
CsSAUR78	381	427	drought-inducibility
CsSAUR78	1167	1212	MeJA-responsiveness
CsSAUR78	1167	1212	MeJA-responsiveness
CsSAUR78	1380	1426	low-temperature responsiveness
CsSAUR79	713	758	MeJA-responsiveness
CsSAUR79	713	758	MeJA-responsiveness
CsSAUR79	987	1033	low-temperature responsiveness
CsSAUR8	1526	1572	MYB binding site involved in drought-inducibility
CsSAUR80	1685	1734	defense and stress responsiveness
CsSAUR80	1267	1312	MeJA-responsiveness
CsSAUR80	1479	1524	MeJA-responsiveness
CsSAUR80	1267	1312	MeJA-responsiveness
CsSAUR80	1479	1524	MeJA-responsiveness
CsSAUR81	703	748	MeJA-responsiveness
CsSAUR81	703	748	MeJA-responsiveness
CsSAUR81	233	279	MYB binding site involved in drought-inducibility
CsSAUR81	558	604	MYB binding site involved in drought-inducibility
CsSAUR81	809	855	low-temperature responsiveness
CsSAUR82	1787	1836	defense and stress responsiveness
CsSAUR82	1146	1191	MeJA-responsiveness
CsSAUR82	1146	1191	MeJA-responsiveness
CsSAUR82	1397	1443	MYB binding site involved in drought-inducibility
CsSAUR84	316	362	low-temperature responsiveness
CsSAUR84	1343	1389	low-temperature responsiveness
CsSAUR84	69	118	defense and stress responsiveness
CsSAUR85	325	371	low-temperature responsiveness
CsSAUR85	1345	1391	low-temperature responsiveness
CsSAUR85	78	127	defense and stress responsiveness
CsSAUR86	1923	1969	MYB binding site involved in drought-inducibility
CsSAUR86	219	264	MeJA-responsiveness
CsSAUR86	260	305	MeJA-responsiveness
CsSAUR86	219	264	MeJA-responsiveness
CsSAUR86	260	305	MeJA-responsiveness
CsSAUR86	885	931	low-temperature responsiveness
CsSAUR87	1933	1979	low-temperature responsiveness
CsSAUR88	1553	1599	MYB binding site involved in drought-inducibility
CsSAUR88	753	802	defense and stress responsiveness
CsSAUR88	1606	1652	low-temperature responsiveness
CsSAUR89	32	77	MeJA-responsiveness
CsSAUR89	359	404	MeJA-responsiveness
CsSAUR89	574	619	MeJA-responsiveness
CsSAUR89	623	668	MeJA-responsiveness
CsSAUR89	32	77	MeJA-responsiveness
CsSAUR89	359	404	MeJA-responsiveness
CsSAUR89	574	619	MeJA-responsiveness
CsSAUR89	623	668	MeJA-responsiveness
CsSAUR9	186	231	MeJA-responsiveness
CsSAUR9	498	543	MeJA-responsiveness
CsSAUR9	186	231	MeJA-responsiveness
CsSAUR9	498	543	MeJA-responsiveness
CsSAUR9	819	865	MYB binding site involved in drought-inducibility
CsSAUR90	369	414	MeJA-responsiveness
CsSAUR90	684	729	MeJA-responsiveness
CsSAUR90	803	848	MeJA-responsiveness
CsSAUR90	848	893	MeJA-responsiveness
CsSAUR90	369	414	MeJA-responsiveness
CsSAUR90	684	729	MeJA-responsiveness
CsSAUR90	803	848	MeJA-responsiveness
CsSAUR90	848	893	MeJA-responsiveness
CsSAUR91	808	854	low-temperature responsiveness
CsSAUR91	233	279	MYB binding site involved in drought-inducibility
CsSAUR91	702	747	MeJA-responsiveness
CsSAUR91	702	747	MeJA-responsiveness
CsSAUR92	969	1015	MYB binding site involved in drought-inducibility
CsSAUR93	1515	1560	MeJA-responsiveness
CsSAUR93	1515	1560	MeJA-responsiveness
CsSAUR93	798	844	MYB binding site involved in drought-inducibility
CsSAUR94	734	780	low-temperature responsiveness
CsSAUR95	1352	1398	low-temperature responsiveness
CsSAUR96	1534	1580	MYB binding site involved in drought-inducibility
