# Supplementary material for: Genome-wide identification of SMALL AUXIN UP RNA (SAUR) gene family and its expression profiles in response to abiotic stress and auxin in tea plants ( Camellia sinensis )
Source: PeerJ journal article supplement (doi:10.7717/peerj.20681), 2026-01-30
Supplement: Table_S10.xlsx [file Table_S10.xlsx]

## Sheet: CsSAURs
Table S10. The RNA-seq data (FPKM）of CsSAURs in different abiotic and hormone treatments
Gene name	Gene ID	Cold Acclimation and Deacclimation						PEG				NaCl			MeJA
		CK	CA1-6h	CA1-7d1	CA2-7d1	DA-7d1	N-0h	PEG-N-24h	PEG-N-48h	PEG-N-72h	N-0h	NaCl-N-24h	NaCl-N-48h	NaCl-N-72h	CK	12h_MeJA	24h_MeJA	48h_MeJA
CsSAUR1	CSS0030699.1	13.595	16.48	11.88	9.99	19.205	25.33	49.68	29.85	46.94	25.33	14.61	25.95	48.89	38.555	31.145	43.475	48.56
CsSAUR2	CSS0046137.1	0	0	0	0	0	0	6.87	0	0	0	1.7	2.09	1.7	1.11	2.21	1.99	0
CsSAUR3	CSS0023839.1	0.42	0	0.98	0	3.38	0.55	0	0	0	0.55	0	0	0	0.99	2.89	2.74	1.375
CsSAUR4	CSS0008211.1	56.53	0.44	0	0.41	38.17	0	0	0	0	0	0	0.44	0.75	14.515	23.67	36.72	10.89
CsSAUR5	CSS0018638.1	0	0	0	0	0	0	0	0	0	0	0	0	0	0	0	0	0
CsSAUR6	CSS0004454.1	0.42	1.01	0	0	3.38	0	0	0	0	0	0	0	0	0.505	0	0	0.46
CsSAUR7	CSS0012504.1	2.215	0.545	0	0.175	2.02	1.06	3.33	4.19	9.62	1.06	1.93	1.18	10.21	2.67	2.115	1.435	1.895
CsSAUR8	CSS0028750.1	10.015	29.635	32.125	28.245	0	0	0	0	0	0	0	0	0	0	0	0	0
CsSAUR9	CSS0030334.1	106.58	108.38	113.77	85.805	130.63	36.5	6.66	9.19	21.17	36.49	11.82	22.14	54.1	11.55	18.635	26.54	10.705
CsSAUR10	CSS0035781.1	0	0	0	0	0	0.79	21.7	10.5	17.31	0.79	1.15	1.42	31.44	0.38	0	0	0
CsSAUR11	CSS0002448.1	0	0	0	0	0	0	0	0	0	0	0	0	0	0	0	0	0
CsSAUR12	CSS0016597.1	0	0.485	0.235	0.225	1.37	4.21	3.18	11.67	2.42	4.21	3.53	4.31	2.48	7.92	0.785	1.75	10.47
CsSAUR13	CSS0023406.1	0.795	0.185	0	0	0	0	0	0	0	0	0	0	0	0.77	1.01	0.225	0
CsSAUR14	CSS0002906.1	0	0	0	0	0	0	0	0	0	0	0	0	0	0.37	0.185	0.335	0.215
CsSAUR15	CSS0015549.1	0	0	0	0	0	0	0	0	0	0	0	0	0	0.37	0.185	0.335	0.215
CsSAUR16	CSS0047292.1	11.005	4.98	6.245	5.045	11.31	0.54	4.58	2.9	5.79	0.54	2.72	5.27	12.17	6.41	9.4	13.455	6.24
CsSAUR17	CSS0019778.1	0	0	0	0	0	0	0	0	0	0	0	0.57	0	0	0	0	0
CsSAUR18	CSS0004553.1	0	0	0	0	0	0	0	0	0	0	1.8	0	0	0	0	0	0
CsSAUR19	CSS0035933.1	0	0	0	0	0	0	0	0	0	0	0	0	0	0	0	0	0
CsSAUR20	CSS0012602.1	0.9	1.92	1.085	0	0.8	0.29	0	0	0	0.29	0	0	0	0.8	2.485	1.725	0.465
CsSAUR21	CSS0006086.1	0	0	0	0	0	0	0	0	0	0	0.2	0	0	0	0	0	0
CsSAUR22	CSS0033994.1	0.53	0	0	0	0	0	0	0	0	0	0	0	0	0	0.145	0	0
CsSAUR23	CSS0013747.1	5.715	0	0	0	20	0	0	0	0	0	0	0	0	7.16	9.885	7.955	2.045
CsSAUR24	CSS0002210.1	0	0	0	0	0.59	0	0	0	0	0	0	0	0	0	0	0	0
CsSAUR25	CSS0000800.1	5.845	0	0	1.16	66.225	0	0.88	0	1.34	0	1.35	0	0	24.73	19.91	19.195	14.19
CsSAUR26	CSS0049538.1	0	0	0	0	0	0	0	0	0	0	0	0	0	0	0.755	1.515	0
CsSAUR27	CSS0026510.1	1.32	0	0	0	0	0	0	0	0	0	0	0	0	0.33	2.445	1.52	0.685
CsSAUR28	CSS0023368.1	9.57	3.485	3.385	2.64	60.64	0.3	0	0	0	0.3	0	0	0	12.83	22.055	27.13	3.69
CsSAUR29	CSS0010104.1	0	0	0	0	0.425	0	0	0	0	0	0	0	0	1.09	3.2	2.62	0
CsSAUR30	CSS0023158.1	0	0	0	0	0.42	0	0	0	0	0	0	0	0	0.68	1.28	3.3	0.71
CsSAUR31	CSS0030522.1	6.085	0.61	0	0	0	0	0	0	0	0	0	0	0	0	0	0	0
CsSAUR32	CSS0043473.1	0	0	0	0	0	0	0	0	0	0	0	0	0	0	0.76	0	0
CsSAUR33	CSS0040578.1	0.485	0	0	0	0	0	0	0	0	0	0	0	0	0.83	0.415	0.33	0
CsSAUR34	CSS0028728.1	1.46	0	0	0	0	0	0	0	0	0	0	0	0	1.385	0.74	0.9	0
CsSAUR35	CSS0007415.1	0	0	0	0	0	0	0	0	0	0	0	0	0	0	0	0	0
CsSAUR36	CSS0006588.1	0	0	0	0	0	0	0	0	0	0	0	0	0	0	0	0	0
CsSAUR37	CSS0029989.1	2.69	0	0	0	0	0	0	0	0	0	0	0	0	0	0	0	0
CsSAUR38	CSS0044939.1	0	0	0	0	0	0	0	0	0	0	0	0	0	0	0	0	0
CsSAUR39	CSS0035953.1	0.52	0	0	0	0	0	0	0	0	0	0	0	0	0	0	0	0
CsSAUR40	CSS0010653.1	5.43	0	0	0	4.545	0	0	0	0	0	0	0	0	0	0	0	0
CsSAUR41	CSS0033227.1	0	0	0	0	0	0	0	0	0	0	0	0	0	0	0	0	0
CsSAUR42	CSS0040677.1	4.75	9.1	0.47	0.22	36.625	0	0	0	0	0	0	0	0	3.385	15.82	4.84	0
CsSAUR43	CSS0043205.1	21.645	5.265	0.47	0.22	96.305	0	0	0	0	0	0	0	0	107.395	115.335	57.925	71.885
CsSAUR44	CSS0003919.1	6.96	7.125	3.295	1.38	10.91	2.62	0.36	1.65	0.84	2.62	2.09	2.09	2.22	20.205	9.14	4.605	28.995
CsSAUR45	CSS0044119.1	0	0	0	0	0	0	0	0	0	0	0	0	0	0	0	0	0
CsSAUR46	CSS0045189.1	5.39	0	0	0	35.15	0.6	0.86	0	0	0.6	0	0	0	7.56	16.9	17.755	1.48
CsSAUR47	CSS0045411.1	3.825	0	0	0	25.89	0	0	0	0	0	0	0	0	4.12	7.145	6.71	0.475
CsSAUR48	CSS0047162.1	0	0	0	0	0	0	0	0	0	0	0	0	0	0.53	0	0.175	0
CsSAUR49	CSS0031693.1	2.285	0	0	0.725	14.835	0	0	0	0	0	0	0	0	1.66	5.565	7.78	0
CsSAUR50	CSS0035350.1	1.94	0.585	0.58	0	0	0	0	0	0	0	0	0	0	1.33	1.38	2.345	0.51
CsSAUR51	CSS0016944.1	0	0	0	0	0	0	0	0	0	0	0	0	0	0	0	0	0
CsSAUR52	CSS0035196.1	2.925	0	0	0	4.625	0.6	0	0	0	0.6	0	0.54	0	2.205	6.655	7.02	0
CsSAUR53	CSS0024467.1	1.46	0	0	0	3.125	0	0	0	0	0	0	0	0	0.895	2.735	1.56	0
CsSAUR54	CSS0038463.1	0	0	0	0	3.965	0.62	0	0	0	0.62	0	0	0	15.02	13.445	8.42	6.8
CsSAUR55	CSS0045796.1	6.59	0	0	0	0	0.62	0	0	0	0.62	0	0	0	1.865	2.29	0.75	0.685
CsSAUR56	CSS0040593.1	3.62	0	0	0	13.695	0	0	0	0	0	0	0	0	4.29	9.195	8.595	0.93
CsSAUR57	CSS0031673.1	14.43	1.735	6.185	3.745	0	0.3	0	0	0	0.3	0	0	0	1.585	4.555	3.095	1.67
CsSAUR58	CSS0012779.1	1.015	0	0	0	0	0	0	0	0	0	0	0	0	0	0	0	1.04
CsSAUR59	CSS0030565.1	7.935	2.395	0	2.17	40.555	0.73	0	0	0.79	0.73	0	0	0	13.665	17.09	8.89	3.14
CsSAUR60	CSS0005218.1	0.485	0	0	0	0	0	0	0	0	0	0	0	0	0.575	0.445	0.38	0
CsSAUR61	CSS0049156.1	0	0	0	0	11.305	0	0	0	0	0	0	0	0	0	1.47	2.03	0
CsSAUR62	CSS0011227.1	17.515	0	0	0	12.64	0	0	0	0	0	0	0	0	0	17.81	12.44	0
CsSAUR63	CSS0014035.1	0	0	0	0	0.59	0	0	0	0	0	0	0	0	0	0	0	0
CsSAUR64	CSS0032455.1	0	0	0	0	0	0	0	1.38	0	0	0	0	0	0	0.88	0.315	0
CsSAUR65	CSS0021275.1	0	0	0	0	0	0	0	0	0	0	0.2	0	0	0	0	0	0
CsSAUR66	CSS0029652.1	0.9	1.92	1.085	0	0.8	0.29	0	0	0	0.29	0	0	0	0.8	2.485	1.725	0.465
CsSAUR67	CSS0001989.1	0	0	0	0	0	0	0	0	0	0	0	0	0	0	0	0	0
CsSAUR68	CSS0044533.1	0	0	0	0	0	0	0	0	0	0	0	0	0	0	0	0	0
CsSAUR69	CSS0038136.1	0	0	0	0	0	0	0	0	0	0	1.35	0	0	0	0	0	0
CsSAUR70	CSS0047497.1	0.32	1.005	0.6	0	0.61	0.67	1.87	0	0.36	0.67	2.66	0.3	0.26	4.265	6.22	1.205	3.165
CsSAUR71	CSS0015721.1	0.32	0	0.355	0	2.015	0	0	0	0	0	0	0.3	0	0	0	0	0
CsSAUR72	CSS0001227.1	3.765	3.84	1.395	2.075	6.365	2.63	1.38	1.05	0	2.63	0.48	0.58	0	10.47	12.915	5.32	21.8
CsSAUR73	CSS0024285.1	9.665	16.415	9.34	4.69	29.745	142.06	662.81	492.37	548.64	142.03	158.94	307.11	569.3	117	12.68	71.09	248.435
CsSAUR74	CSS0004746.1	0	0	0	0	0	0	0	0	0	0	0	0	0	3.46	3.165	3.11	2.03
CsSAUR75	CSS0048307.1	1.66	0.43	2.02	1.01	6.895	2.08	0.83	6.29	2.23	2.08	6.7	7.66	3.88	3.5	1.585	4.02	7.265
CsSAUR76	CSS0037855.1	0	0	0	0	0	0	0	0	0	0	0	0	0	0	0	0	0
CsSAUR77	CSS0042595.1	0	0	0	0	0	0	0	0	0	0	0	0	0	0	0	0	0
CsSAUR78	CSS0043296.1	0	0	0	0	0	0	0	0	0	0	0	0	0	0	0	0	0
CsSAUR79	CSS0011505.1	0	0	0	0	0	0	0	0	0	0	0	0	0	0	0	0	0
CsSAUR80	CSS0000549.1	0	0	0	0	0	0.69	0	0	0	0.69	0	0	0	0	0.15	0.105	0
CsSAUR81	CSS0009432.1	0	0	0	0	0	0	0	0	0	0	0	0	0	0.825	0.225	0.755	0
CsSAUR82	CSS0036444.1	0.2	0	0	0	1.79	0	0.46	0.35	0	0	0	0.29	0	8.535	0.24	0.1	14.6
CsSAUR83	CSS0007979.1	3.55	11.435	4.645	2.135	15.02	239.36	265.57	384.86	86.94	239.96	277.9	201.73	301.45	22.82	3.205	9.805	63.145
CsSAUR84	CSS0047069.1	0	0	0	0	0	0	0	0	0	0	0	0	0	0	0	0	0
CsSAUR85	CSS0032131.1	0	0	0	0	0	0	0	0	0	0	0.31	0.38	0.33	0.205	0	0.21	0.32
CsSAUR86	CSS0042117.1	1.21	3.775	3.635	2.12	1.365	30.44	95.82	44.84	2.27	30.44	55.79	96.89	9.12	1.705	1.585	2.475	5.41
CsSAUR87	CSS0031836.1	0	0	0	0	0	0	0	0	0	0	0	0	0	0	0	0	0
CsSAUR88	CSS0043539.1	0	0.305	0.095	0.295	0	0.16	0	0	0	0.16	0	0	0	0.295	0.12	0	0
CsSAUR89	CSS0017690.1	4.185	1.055	8.17	2.32	2.47	7.3	0.91	1.61	1.84	7.3	57.84	6.49	0.98	8.485	4.085	3.695	6.705
CsSAUR90	CSS0034956.1	4.185	1.055	8.17	2.32	2.47	7.3	0.91	1.61	1.84	7.3	57.84	6.49	0.98	8.485	4.085	3.695	6.705
CsSAUR91	CSS0010550.1	0	0	0	0	0	0	0	0	0	0	0	0	0	1.11	0.53	0.265	0.165
CsSAUR92	CSS0024575.1	1.64	0	0	0	6.435	0	0.78	0.88	0.59	0	0	0.25	0.86	4.025	4.98	4.33	3.06
CsSAUR93	CSS0045769.1	14.475	4.79	3.185	3.495	32.535	0	0	0.61	0	0	0	0	0.42	13.565	33.855	27.48	7.655
CsSAUR94	CSS0012756.1	0	0	0.45	0	0	0	0	0	0	0	0	0	0	0	0	0.46	0.205
CsSAUR95	CSS0021458.1	0.23	0	0	0	0	0	0	0	0	0	0	0	0	0.33	0.26	0.175	0
CsSAUR96	CSS0019390.1	30.54	69.91	99.91	113.385	8.41	304.15	400.09	410.61	195.72	304.31	198.8	136.86	338.91	2.35	2.46	2.415	2.98
CsSAUR97	CSS0034397.1	4.2	8.53	5.525	1.515	0.41	21.17	21.57	68.27	7.96	21.22	33.84	18.42	27.14	2.53	0.495	1.375	3.875
