# Supplementary material for: Genome-wide identification of SMALL AUXIN UP RNA (SAUR) gene family and its expression profiles in response to abiotic stress and auxin in tea plants ( Camellia sinensis )
Source: PeerJ journal article supplement (doi:10.7717/peerj.20681), 2026-01-30
Supplement: Table_S11.xlsx [file Table_S11.xlsx]

## Sheet: IAA
Table S11. Raw data of qRT-PCR
		Ct value								Ct value
IAA treatment	Biological replicate	Actin	GAPDH	SAUR10	SAUR12	SAUR16	SAUR70/71	IAA treatment	Biological replicate	GADPH	SAUR73
0 h	1	15.591	15.3053	27.4983	25.9553	23.4987	25.6924	0 h	1	14.113	24.4394
	2	15.7568	15.3029	27.8462	25.995	23.467	25.6596		2	14.4123	24.3201
	3	15.579	15.0254	27.3985	25.9248	23.2165	25.5604		3	14.1332	24.2913
	4	15.4444	15.1914	27.6947	25.7035	23.5029			4	13.8504	23.9034
3 h	1	15.1906	15.0825	26.9838	23.9671	23.563	24.6693	3 h	1	14.6768	23.348
	2	15.337	15.1514	26.4019	24.0185	23.571	24.9544		2	14.6086	23.2236
	3	15.1361	15.0904	26.367	23.8042	23.5274	24.3617		3	14.1708	23.0994
	4	15.2763	15.2711	26.5492	24.0088	23.6254	24.7208		4	14.2207	22.9948
6 h	1	15.2331	15.5085	27.0546	24.0562	24.203	23.3686	6 h	1	13.9612	22.9718
	2	15.3288	15.7572	26.7716	24.1288	24.2548	23.457		2	14.0408	23.2004
	3	15.0459	15.4204	26.7208	24.261	24.004	23.1833		3	14.0158	22.7008
	4	15.2689	15.4972	26.7106	24.0779	24.4036	23.5022		4	13.9537	23.1645
12 h	1	15.5191	15.5181	26.8661	23.532	23.0531	22.761	12 h	1	14.2682	23.2064
	2	15.5943	15.492	27.0578	23.3327	22.8184	23.0403		2	14.0693	22.9427
	3	15.1531	15.3069	26.989	23.1253	22.759	22.8468		3	14.134	23.0474
	4	15.393	15.2934	27.0494	23.2664	22.9752	23.1582		4	14.5671	23.1445

## Sheet: Temprature
Table S11. Raw data of qRT-PCR
		Ct value
Cold	Biological replicate	GAPDH	SAUR16	SAUR42/43	SAUR73
CK	1	17.0823	24.3903	21.2129	26.2875
	2	16.7137	24.2434	21.0881	26.1446
	3	16.722	23.9771	21.013	25.8259
	4	16.6415	24.3064	21.0595	25.8334
CA	1	17.0527	24.7064	24.5486	25.5255
	2	16.7097	24.4848	24.6184	25.5397
	3	16.9983	24.4049	24.2081	25.6116
	4	16.9358	24.374	24.1334	25.5478
DA	1	16.6567	23.3059	18.4021	23.2279
	2	16.5241	23.242	18.4782	23.2623
	3	16.2618	23.2755	18.3779	23.0605
	4	16.3053	23.3	18.6047	23.0301

## Sheet: PEG
Table S11. Raw data of qRT-PCR
		Ct value
PEG	Biological replicate	GAPDH	SAUR7	SAUR16	SAUR73	PEG	Biological replicate	GAPDH	SAUR10
0	1	17.0823	25.8012	24.3903	26.2875	0	1	17.3126	29.739
	2	16.7137	25.8496	24.2434	26.1446		2	17.757	30.0235
	3	16.722	25.6165	23.9771	25.8259		3	17.405	29.9638
	4	16.6415	25.3475	24.3064	25.8334		4	17.2192	29.9836
24 h	1	16.8725	25.4368	23.6222	23.3622	24 h	1	17.2274	25.3055
	2	16.8969	25.3568	23.7293	23.2888		2	17.3684	25.8378
	3	16.6676	25.2729	23.3721	23.1277		3	17.3659	25.435
	4	16.6433	25.4402	23.4172	23.1765		4	17.2036	25.537
48 h	1	16.8	25.0607	22.1958	25.2863	48 h	1	17.1268	25.9098
	2	17.1129	25.5614	22.2967	25.4146		2	17.2647	25.6174
	3	16.6919	25.6176	21.8689	24.926		3	17.1713	25.6307
	4	16.6744	25.2497	21.889	25.1978		4	17.2246	25.5095
72 h	1	16.7966	22.8796	21.115	25.246	72 h	1	17.2624	25.6377
	2	17.1416	22.4701	21.4144	25.1181		2	17.4089	25.7926
	3	17.089	22.5846	20.9768	24.8026		3	17.1832	25.5504
	4	16.863	22.4685	21.361	25.2565		4	17.3683	25.4508

## Sheet: NaCl
Table S11. Raw data of qRT-PCR
		Ct value
NaCl	Biological replicate	GAPDH	SAUR7	SAUR16	SAUR73	NaCl	Biological replicate	GAPDH	SAUR10
0	1	17.0823	25.8012	24.3903	26.2875	0	1	17.4646	29.3409
	2	16.7137	25.8496	24.2434	26.1446		2	17.3458	29.7462
	3	16.722	25.6165	23.9771	25.8259		3	17.1052	29.527
	4	16.6415	25.3475	24.3064	25.8334		4	17.411	29.3756
24 h	1	16.8725	25.6974	24.0052	25.5195	24 h	1	17.2875	28.3876
	2	16.8969	26.0136	23.7196	25.6533		2	17.4455	28.6684
	3	16.6676	25.5734	23.4377	25.312		3	17.2436	28.4413
	4	16.6433	26.0152	23.5874	25.5671		4	17.2948	28.2858
48 h	1	16.8	25.7374	22.5624	24.7739	48 h	1	17.3529	28.5039
	2	17.1129	25.98	22.5847	24.6249		2	17.3909	28.6456
	3	16.6919	25.3309	22.5956	24.4171		3	17.1677	28.7441
	4	16.6744	25.7344	22.2242	24.41		4	16.9821	28.5565
72 h	1	16.7966	22.3513	21.0865	23.5158	72 h	1	17.1046	25.66
	2	17.1416	22.1526	21.5697	23.5832		2	17.4959	25.5724
	3	17.089	22.4994	21.3224	23.344		3	17.3795	25.632
	4	16.863	22.3154	21.4943	23.2993		4	17.1381	25.9889

## Sheet: MeJA
Table S11. Raw data of qRT-PCR
		Ct value
MeJA	Biological replicate	GAPDH	SAUR73	SAUR82	MeJA	Biological replicate	GAPDH	SAUR16
0	1	17.0823	26.2875	25.1888	0	1	17.1947	25.3561
	2	16.7137	26.1446	25.2041		2	17.3825	25.4273
	3	16.722	25.8259	25.1315		3	17.2836	25.6332
	4	16.6415	25.8334	25.0943		4
6 h	1	16.0727	26.5195	25.9388	6 h	1	17.1338	25.0377
	2	16.4115	26.3779	25.7242		2	17.4466	24.5242
	3	16.0153	26.1204	25.4823		3	17.1647	24.3381
	4	16.1358	26.4075	26.1198		4	17.4614	24.6654
12 h	1	16.2185	26.0083	28.6175	12 h	1	17.2065	24.3704
	2	16.077	25.7923	28.7613		2	17.2999	24.3776
	3	16.2981	25.5816	28.0937		3	17.1856	24.1113
	4	16.3032	26.058	28.8418		4	17.0773	24.5435
24 h	1	16.162	23.1881	28.539	24 h	1	17.2495	23.933
	2	16.5011	23.3133	28.8034		2	17.3371	24.1575
	3	15.936	23.063	28.3072		3	17.1894	23.886
	4	16.5218	23.3015	28.7941		4	17.4307	23.6565
