# Supplementary material for: Genome-wide identification of SMALL AUXIN UP RNA (SAUR) gene family and its expression profiles in response to abiotic stress and auxin in tea plants ( Camellia sinensis )
Source: PeerJ journal article supplement (doi:10.7717/peerj.20681), 2026-01-30
Supplement: Untreated_Tempreature_MeJA.xlsx [file Untreated_Tempreature_MeJA.xlsx]

## Sheet: Melt Curve Derivative Results
	Temperature	A1	A2	A3	A4	A5	A6	A7	A8	A9	A10	A11	B1	B2	B3	B4	B5	B6	B7	B8	B9	B10	B11	C1	C2	C3	C4	C5	C6	C7	C8	C9	C10	C11	D1	D2	D3	D4	D5	D6	D7	D8	D9	D10	D11	E1	E2	E3	E5
	65	0.684492	0.882293	0.440583	0.454925	1.03691	0.480224	0.829028	0.559268	0.730489	2.45963	2.83859	1.26109	1.43717	0.387586	0.607314	1.10881	0.987668	1.13968	0.827655	1.49956	2.12097	2.68061	1.7401	1.42517	0.663584	1.00421	1.56593	1.18168	1.27148	0.408059	1.62889	1.76504	2.91973	0.101125	1.80427	1.02421	1.30611	1.11123	0.720203	0.643366	-0.00358917	1.14486	2.06304	1.77718	0.92789	0.518858	0.761364	1.63144
	65.5	1.48307	1.91164	0.954596	0.985671	2.24663	1.04048	1.79623	1.21175	1.58273	5.3292	6.15028	2.73236	3.11386	0.839769	1.31585	2.40243	2.13995	2.46931	1.79325	3.24904	4.59544	5.80799	3.77022	3.08786	1.43776	2.17578	3.39284	2.56031	2.75488	0.884127	3.52925	3.82425	6.32609	0.219105	3.90925	2.21912	2.82991	2.40766	1.56044	1.39396	-0.00777653	2.48054	4.46991	3.85055	2.01043	1.12419	1.64962	3.53478
	66	1.36898	1.76459	0.881166	0.90985	2.07381	0.960447	1.65806	1.11854	1.46098	4.91926	5.67718	2.52217	2.87434	0.775171	1.21463	2.21763	1.97534	2.27936	1.65531	2.99911	4.24195	5.36122	3.4802	2.85033	1.32717	2.00841	3.13185	2.36336	2.54296	0.816117	3.25777	3.53008	5.83947	0.202251	3.60854	2.04842	2.61222	2.22246	1.44041	1.28673	-0.00717834	2.28973	4.12607	3.55435	1.85578	1.03772	1.52273	3.26288
	66.5	1.36898	1.76459	0.881166	0.90985	2.07381	0.960447	1.65806	1.11854	1.46098	4.91926	5.67718	2.52217	2.87434	0.775171	1.21463	2.21763	1.97534	2.27936	1.65531	2.99911	4.24195	5.36122	3.4802	2.85033	1.32717	2.00841	3.13185	2.36336	2.54296	0.816117	3.25777	3.53008	5.83947	0.202251	3.60854	2.04842	2.61222	2.22246	1.44041	1.28673	-0.00717834	2.28973	4.12607	3.55435	1.85578	1.03772	1.52273	3.26288
	67	1.36898	1.76459	0.881166	0.90985	2.07381	0.960447	1.65806	1.11854	1.46098	4.91926	5.67718	2.52217	2.87434	0.775171	1.21463	2.21763	1.97534	2.27936	1.65531	2.99911	4.24195	5.36122	3.4802	2.85033	1.32717	2.00841	3.13185	2.36336	2.54296	0.816117	3.25777	3.53008	5.83947	0.202251	3.60854	2.04842	2.61222	2.22246	1.44041	1.28673	-0.00717834	2.28973	4.12607	3.55435	1.85578	1.03772	1.52273	3.26288
	67.5	1.51292	1.79072	0.945251	0.903541	2.14666	0.946081	1.71093	1.23785	1.48877	5.04752	5.73916	2.60213	2.93562	0.798946	1.27285	2.28961	2.01723	2.3083	1.79215	3.02989	4.25546	5.3963	3.51957	2.88234	1.3014	2.0491	3.19472	2.32997	2.63501	0.925169	3.27478	3.56989	5.99035	0.303326	3.69621	2.05815	2.65834	2.32652	1.41823	1.32076	0.0832042	2.31402	4.2112	3.61458	1.94678	1.10188	1.62643	3.31714
	68	0.588333	1.65864	0.490887	1.06212	1.76173	1.08164	1.4774	0.454329	1.41591	4.26851	5.38023	2.13204	2.6229	0.593186	0.9385	1.84941	1.73562	2.18042	0.808694	2.9109	4.22068	5.20671	3.40435	2.6839	1.51149	1.7838	2.88072	2.59974	2.15031	0.171731	3.21481	3.31443	4.98722	-0.324513	3.14585	2.05656	2.32995	1.71554	1.59874	1.15693	-0.490728	2.25135	3.67216	3.31328	1.38091	0.7261	0.954441	3.07879
	68.5	-0.897577	1.21421	0.0532745	0.349326	0.44744	0.951387	0.209219	-0.649396	0.384382	2.57281	4.48662	1.07024	1.43583	0.679954	0.0521838	0.960006	1.40848	1.53805	0.0866359	2.02294	3.72772	4.71687	2.15557	2.44331	1.47397	1.42057	1.68535	2.63088	0.479627	-0.583092	2.77468	2.93453	3.61463	-1.47478	2.24095	1.62678	2.18128	0.223838	1.64839	0.402812	-1.44567	1.44447	2.76897	1.98773	0.340962	-0.124521	-0.102554	1.83284
	69	-1.92456	0.35475	0.334298	-0.722705	-0.745377	0.632434	-1.02752	-1.43606	-0.524104	1.66311	3.59563	-0.190696	0.341479	1.14105	-0.603273	0.215533	1.11375	0.569336	0.0928858	1.43636	3.23498	3.48091	0.176395	1.34319	1.35253	1.03283	0.082127	2.11956	-1.23199	-1.04373	1.79722	2.44337	3.18099	-2.72077	0.888831	0.435021	1.39467	-0.849195	1.02101	-0.10512	-2.39589	-0.0325033	1.87438	1.67903	-0.728993	-1.31988	-0.639422	0.145822
	69.5	-3.40743	-1.1725	0.831701	-1.14823	-1.76109	0.364469	-1.76853	-2.70079	-0.62333	1.40865	3.11716	-2.0069	-0.209339	1.28932	-0.956727	-0.442151	0.325466	-0.64576	-0.873752	1.00749	2.85636	1.55531	-1.6002	-0.979976	1.16997	-0.0987633	-1.41049	0.988571	-1.33649	-1.83057	0.794865	1.63593	1.75524	-3.47791	-0.512322	-0.12747	0.0581747	-1.4538	0.114887	-0.122301	-2.94209	-1.12869	0.984369	2.08656	-1.21875	-2.27623	-1.32881	-1.37792
	70	-4.39694	-1.92396	0.306229	-1.76665	-3.03781	-0.340151	-2.40027	-3.86583	-0.882405	0.74489	2.34184	-3.75172	-0.842671	0.727	-1.46482	-1.07035	-0.830929	-1.49683	-1.94543	0.408917	2.02606	-0.152743	-3.32901	-2.67695	0.704412	-1.02957	-2.03779	-0.0224817	-1.25736	-2.49228	0.0947778	1.07956	-0.108762	-4.06988	-1.26909	-0.355508	-1.13963	-2.49118	-0.659046	-0.232598	-2.65366	-1.32276	0.441649	0.908627	-1.82358	-2.6643	-1.77708	-2.36303
	70.5	-4.21328	-2.32438	-0.121727	-2.86442	-3.79868	-1.10934	-3.13257	-4.57753	-1.27412	0.169843	1.46368	-4.54816	-1.48713	-0.237939	-2.04723	-1.41626	-1.54143	-2.2844	-2.17721	-0.162924	0.841896	-0.924232	-5.13135	-3.6671	0.112914	-1.93267	-2.56932	-0.524014	-1.38159	-3.38318	-1.00299	0.347648	-0.845387	-4.56008	-2.03284	-0.988755	-2.29733	-3.41827	-1.22099	-0.689616	-2.0834	-1.03721	0.272635	-0.695337	-2.75045	-2.92757	-2.1232	-2.93955
	71	-3.3949	-2.95865	0.200231	-3.07751	-3.71239	-1.09052	-3.44442	-5.41384	-0.51532	0.0378732	1.62043	-4.74811	-1.57117	-0.528055	-2.31456	-2.07859	-2.18174	-3.43137	-2.88298	-0.685755	0.344753	-0.59527	-5.61471	-4.51381	-0.502534	-3.20195	-3.37284	-0.912586	-0.652809	-4.30697	-2.07327	-0.15668	-1.20555	-4.40988	-2.94018	-0.981707	-3.12506	-3.2728	-1.28073	-0.950035	-2.06254	-0.600823	-0.405944	-0.7994	-2.58293	-2.62341	-3.06227	-2.73882
	71.5	-2.36184	-3.11246	0.388892	-2.69684	-3.23947	-0.790324	-3.01369	-5.7009	0.376401	-0.325014	1.8399	-4.27827	-1.39479	-0.395397	-2.10145	-2.20615	-2.7773	-4.06992	-3.76728	-0.81796	-0.222842	-0.31941	-4.62434	-4.46601	-0.946643	-3.6913	-3.70779	-1.26265	-0.3842	-4.18244	-2.23696	-0.478867	-1.95329	-3.39369	-2.51517	-0.455785	-3.14821	-2.80627	-0.407675	-1.12342	-1.93522	0.0184724	-1.28915	-1.3086	-1.29344	-1.59351	-3.39473	-1.67824
	72	-0.642619	-2.32545	0.820754	-2.71014	-2.541	-0.717321	-2.68796	-4.35462	0.519707	-0.947399	1.36435	-2.17332	-1.06819	-0.198903	-1.61721	-1.50423	-2.1166	-3.96946	-3.71653	-0.993868	-0.995646	-0.158627	-2.75265	-3.0562	-0.785869	-2.82394	-3.27798	-0.607372	-0.981613	-3.18773	-2.27278	-0.751548	-2.082	-1.67745	-1.07324	-0.244789	-2.32817	-1.51215	0.850977	-1.13237	-1.02554	1.63713	-0.765029	-2.0823	0.0796649	-0.659202	-2.86071	-0.387352
	72.5	2.27219	-0.846413	1.74949	-1.95382	-1.31195	0.434449	-2.38561	-2.40355	2.12716	-0.815949	1.0203	0.592427	-0.242884	0.661546	-0.493514	-0.408153	-0.473709	-3.60305	-2.64888	-0.293848	-0.646653	0.639051	0.370752	-1.38507	0.360978	-1.8939	-2.23878	0.854164	-0.896861	-1.58163	-1.96088	-0.357218	-1.43596	0.832579	0.739258	0.622763	-1.06354	0.599734	2.36505	-0.627423	-0.263908	3.61572	0.403539	-0.66038	2.12574	0.315638	-1.59816	1.95506
	73	5.54402	0.633044	3.46429	-0.195417	0.672823	2.53306	-1.34732	-0.132496	4.29134	0.400206	1.70676	3.54964	1.13761	2.83932	1.35582	1.21217	1.54585	-2.91793	-0.945932	1.82995	0.834554	1.49202	4.07947	0.617537	2.16206	-0.592193	-0.717867	2.40782	-0.336213	1.29258	-0.429459	1.04914	-0.273228	3.84148	3.36308	2.68166	1.05508	3.17071	4.13404	0.239948	0.816041	4.70028	1.41433	1.73913	5.51641	1.64413	0.462306	4.89586
	73.5	8.29373	2.80572	4.94139	1.84662	3.4985	4.32223	0.253147	3.28762	5.49479	2.12818	2.1337	6.98672	3.2218	4.90602	3.75651	4.0637	3.83921	-1.50919	1.19981	4.40626	2.66276	1.88192	7.44905	3.68167	4.87726	1.94278	2.47639	4.84544	0.286688	4.53328	1.82349	3.07496	1.6181	7.17931	6.53606	4.86792	3.8196	6.27951	6.00004	1.73607	3.41412	6.41848	4.20905	3.60571	8.62859	2.58393	3.42599	7.48541
	74	10.7604	5.49671	6.22395	3.66354	6.46764	6.11963	1.94621	6.50205	6.96631	4.34425	3.15097	9.4333	5.69547	6.79587	6.08028	6.77515	6.26761	0.292769	4.19438	6.89209	5.09103	3.07535	10.9078	6.96478	8.20789	4.68342	6.57	7.63704	2.2839	7.52021	4.51807	5.89144	4.09522	10.4521	9.51149	7.38757	6.76353	8.98754	7.55629	3.97666	6.53435	8.96269	7.79936	5.78755	11.2355	3.59888	6.65931	9.96407
	74.5	13.2338	8.0264	7.48992	6.11258	9.18884	8.30375	4.01305	8.51053	9.09768	6.88714	5.90711	10.9159	8.02593	9.35521	7.85378	8.75428	8.47058	2.53417	7.21568	9.61492	8.4384	5.37798	14.2884	9.5835	11.1986	7.40742	9.69531	9.98918	5.01563	10.4618	7.48682	9.16272	7.3402	12.963	11.7403	10.1752	9.31727	10.5672	9.06276	6.13476	8.59332	10.6121	10.2668	8.69686	13.982	5.38886	9.64431	12.5571
	75	14.4912	10.0722	8.89718	8.49695	11.8234	9.73453	6.28142	10.2863	10.0212	9.54027	8.89152	12.699	10.289	11.4275	9.79506	11.1733	10.4651	4.71769	9.13749	12.0265	11.1933	7.7205	16.3865	12.1066	13.5293	10.2064	11.8246	12.2497	7.1388	13.0728	10.1637	12.0072	10.354	14.9165	13.5964	12.3406	11.2599	12.6973	10.9308	8.01152	10.6707	11.8512	12.5353	10.482	16.1441	7.4005	11.8964	14.3415
	75.5	15.4135	11.6143	9.5238	9.91061	13.7232	10.7426	8.43521	12.1766	10.2235	11.557	11.1409	13.6504	12.134	12.3112	11.2192	13.0049	11.7484	6.94346	10.6086	12.9996	13.119	9.9157	18.2226	14.2308	15.3681	12.4871	14.0288	14.2228	9.40621	15.2368	12.0146	14.2141	12.8077	16.1484	14.873	13.7607	12.7919	14.6979	12.1115	9.9086	13.1801	13.8193	14.9181	11.7118	17.3621	9.51001	14.0399	15.3547
	76	16.5513	12.3293	9.90543	10.8067	13.9485	11.8866	10.5625	13.405	10.78	13.0407	13.3129	13.6636	13.0584	12.8588	11.4488	13.7014	12.6151	9.20751	12.0466	13.2812	14.3642	12.0698	20.054	15.2479	16.2408	13.8532	15.0677	15.0449	11.6269	16.5555	12.9198	15.6588	14.6574	16.5506	15.7031	15.0136	13.5041	15.1336	12.8735	11.2683	14.4266	15.0964	15.5274	12.9911	18.0511	12.0396	15.6421	15.7842
	76.5	17.0691	12.7757	10.228	11.6447	13.3671	12.4652	12.3525	14.5296	11.094	14.3415	14.6903	14.5201	13.7867	13.2427	11.7997	14.1204	13.4045	10.6835	12.3093	13.7947	15.0529	13.8078	20.7806	15.9852	15.9997	14.5231	14.981	15.8643	12.8231	16.9548	13.2499	16.0371	15.9773	16.3726	15.62	15.5639	13.4641	16.0178	14.0886	11.9045	14.3631	15.2011	15.1776	13.8672	18.0446	13.7325	15.6789	16.1202
	77	17.0357	13.0566	10.0324	11.9706	13.4062	12.7419	13.6698	15.3292	10.8875	15.3646	14.403	15.0492	14.3056	12.9344	12.5429	14.3098	13.5484	11.508	12.5043	14.1025	15.2215	14.748	19.9987	16.7621	15.6523	14.2697	15.644	16.4235	13.1954	17.2918	13.4031	16.1326	16.807	16.1359	15.3612	15.3485	13.2404	16.9193	14.5071	12.502	14.8941	15.1312	15.557	14.8205	17.5333	14.4467	15.6574	16.9085
	77.5	16.988	13.0454	9.8936	11.9073	13.3988	13.323	14.7521	15.4107	10.8587	15.7562	14.3267	14.4335	14.3803	12.6063	12.2794	13.8266	12.9966	12.231	13.2145	13.9882	15.4428	15.1664	18.9641	16.8527	15.4492	13.7372	16.2207	16.0521	13.8361	17.1951	13.6009	16.4233	17.3718	15.776	15.2062	15.2228	13.0721	16.2907	13.9012	13.0032	15.1304	14.7974	15.5891	15.5618	17.1801	15.0337	16.2265	17.3137
	78	16.2372	13.7742	9.84826	11.9128	13.0146	13.1812	14.6935	15.4583	11.6461	16.3247	14.6323	14.1038	14.3803	12.7115	12.2146	13.2423	12.9658	12.5739	13.4899	14.2278	15.5377	15.5715	18.0605	16.5271	15.2858	13.8225	15.7346	15.3706	14.5967	16.2605	14.1956	16.2799	17.616	15.6235	15.0054	14.8956	12.9179	15.6294	14.0815	13.0763	14.1177	14.0388	15.2338	15.7817	17.1078	14.882	16.7857	17.3015
	78.5	14.8888	14.6919	10.0024	11.6963	13.4262	12.4177	14.0029	15.1515	12.2277	16.8022	14.8862	14.3031	14.3726	13.0168	12.8603	12.7562	13.1143	12.3822	13.7316	14.7478	16.2167	16.0597	16.4145	16.4751	15.0597	14.1007	15.3024	15.2014	14.9518	15.6165	15.1974	15.952	17.5356	15.5006	14.8978	14.4499	12.6122	15.3844	14.1489	13.2589	13.2871	13.8577	15.5351	16.0639	17.6067	13.8677	20.474	17.9988
	79	14.2933	14.813	11.1963	11.5469	14.1613	12.7321	13.4203	14.4687	12.1436	16.3511	14.9939	14.0705	14.1031	14.0136	12.7227	12.8046	13.5763	12.8053	14.259	14.7752	17.3568	15.9571	15.3438	16.2099	16.19	14.76	15.5844	16.1905	15.1695	15.4776	15.9848	16.198	17.2849	15.3357	15.7205	15.6308	12.3485	14.3417	14.4848	13.2307	13.5825	14.6932	16.6177	16.6378	18.6626	13.7004	31.4701	18.2889
	79.5	14.1021	14.938	16.1413	11.1134	13.7155	17.6167	12.8267	14.0242	12.5542	16.4841	15.7331	13.8642	14.0436	19.4265	12.3125	13.3248	19.2475	13.5002	13.4546	14.7557	17.6245	16.0922	15.5108	15.9774	22.3702	15.6766	15.3705	22.74	15.8437	14.6226	16.469	16.8012	16.9055	15.0297	16.669	22.1892	12.4796	14.1838	21.1355	13.4243	13.6175	15.725	17.4038	16.6013	20.744	14.3082	49.0042	17.8518
	80	14.0038	15.8646	26.1299	10.6375	13.7369	28.8484	13.2859	13.9055	13.6353	17.6597	17.3545	13.7567	14.551	31.5971	12.1533	14.233	32.4237	14.7235	12.2856	15.9203	18.3466	17.2401	16.0103	16.7065	36.2476	15.8	15.6386	37.9418	17.5213	14.1583	17.3372	17.6017	17.4632	15.0924	17.5492	35.7379	12.8245	15.5649	35.5903	15.1872	13.4048	17.1065	18.9687	17.3501	24.628	15.3849	70.1203	18.7114
	80.5	13.9117	17.1914	38.6323	10.4955	15.6817	43.8443	18.8287	13.4676	15.4781	19.6075	20.0117	13.5652	16.5315	46.5978	11.8076	16.379	47.8636	20.1974	12.1679	19.0924	20.9786	19.5418	16.2567	19.81	53.797	15.486	18.4334	56.7538	23.3591	14.7625	19.7122	20.7666	20.2936	15.3896	20.1415	52.7635	13.1008	17.7286	52.2508	21.5445	14.2492	20.6073	22.3633	20.4392	30.995	21.9491	91.1344	21.5663
	81	14.3364	22.3006	50.9174	11.6086	21.1774	59.1829	31.5268	15.2009	21.1083	26.7935	27.2155	13.3852	23.4287	60.654	13.3167	22.3236	62.6908	32.6055	13.6108	26.8648	28.4174	26.137	17.4417	27.7111	70.807	17.5022	25.9612	74.2768	37.314	18.0285	27.5659	30.0638	28.3867	15.6991	27.514	69.0537	15.9182	24.914	68.6196	34.9788	17.5567	29.2658	30.5897	28.3579	40.9912	37.3572	105.743	29.7341
	81.5	14.8006	34.6556	61.3914	18.6507	33.0143	72.1605	50.1313	24.794	33.3727	41.9426	41.7918	12.9556	36.6591	72.4021	21.8133	33.2698	76.0504	50.003	22.0933	40.9425	42.0906	40.0235	18.3312	42.7176	85.1951	26.9133	39.486	88.9631	57.8837	30.7208	42.2518	46.0768	44.0365	16.1824	41.2126	81.6862	26.4047	39.5068	82.5176	54.7297	28.1491	43.5403	45.5329	43.024	55.3466	57.8798	106.844	45.3261
	82	15.0821	50.7076	64.1469	33.6377	49.8755	75.4087	71.105	43.5853	48.2087	59.8779	59.7538	13.212	53.0214	75.1347	37.9648	47.0497	79.1373	68.8162	39.5719	58.4677	59.8027	57.7213	18.818	62.0157	89.0773	44.9359	56.7285	92.3785	79.6255	52.9125	59.5999	64.4715	63.9478	16.9346	58.652	83.848	44.5232	56.5576	84.8992	75.6532	46.7739	60.5094	63.2495	61.2434	70.482	79.4414	93.2688	64.3326
	82.5	16.6038	65.7663	55.3968	51.4968	66.1727	65.1544	89.5248	65.7294	62.3373	76.4294	76.1062	15.2447	68.9308	64.2801	57.389	60.4242	67.2358	85.794	59.282	74.558	77.0592	74.2822	21.1933	80.6292	76.7224	67.0891	73.9906	78.7102	98.7387	76.8091	75.9512	82.0872	82.2065	18.3998	75.6888	71.5982	64.4737	72.217	71.9339	93.478	67.9538	77.2837	79.2139	78.5209	81.704	99.6424	70.8761	82.0571
	83	25.6114	78.2403	41.4971	68.853	79.0375	48.1306	99.1935	87.1419	73.3461	90.0352	89.2314	23.3535	81.4771	47.0442	76.0401	71.0928	49.3791	93.9332	77.5523	86.1178	90.0464	87.0632	30.7946	94.5846	56.2852	88.3751	87.3544	57.6699	108.522	98.9509	88.3266	95.3138	96.1843	25.8571	88.7555	52.0157	83.3818	85.0799	52.5856	102.431	87.6407	89.3929	91.5873	91.8995	86.8222	109.749	46.681	95.7601
	83.5	43.8603	82.6176	27.3956	83.4022	83.9519	30.4776	94.9069	103.443	75.7785	93.0939	92.4661	39.6272	83.9695	30.3641	90.3017	73.8502	31.9925	88.1808	91.7744	87.4993	91.7839	90.0207	49.9782	97.7699	36.7749	104.27	90.5975	37.7295	101.574	114.77	89.3171	96.203	99.3559	42.4628	91.6122	32.8764	97.6403	88.0726	33.7202	96.3049	101.761	89.3091	92.7047	94.6139	82.7178	102.572	25.115	97.809
	84	65.2103	73.3177	13.6149	85.6483	75.682	15.2424	77.5554	104.243	66.4219	81.0242	81.0876	59.661	73.1781	15.0871	90.9427	65.3012	15.165	71.4221	91.5412	75.4475	79.4756	78.9206	73.0906	86.0604	18.8612	104.202	80.0052	18.8936	81.3124	111.599	76.4913	82.0762	86.5115	63.1652	80.1496	16.6261	96.164	76.9285	16.5528	77.8494	99.9149	75.8314	78.8952	82.1918	68.4896	82.8648	10.5026	84.3975
	84.5	85.9679	55.4932	3.83712	72.2944	58.1642	5.75264	54.81	86.9259	50.0132	60.7398	61.3829	78.4196	54.9836	4.45846	75.512	49.8444	3.6719	50.3196	75.1837	55.6507	59.5006	58.8891	95.7561	64.823	6.01907	86.258	61.0094	5.79706	57.4667	89.6572	57.1105	60.8747	64.3521	83.5691	60.6677	5.65053	78.0055	58.4887	4.94272	55.3003	81.4832	56.3042	58.6594	61.8938	49.4232	58.9566	3.87144	63.125
	85	103.229	36.9303	0.367591	52.5977	39.2446	2.47308	33.331	62.3726	32.9469	40.0535	40.7843	93.2663	35.9155	0.749557	54.1248	33.2752	0.41861	30.2019	53.9471	35.0022	38.4366	38.3414	114.127	42.3818	1.69007	61.5693	40.4336	1.33869	34.392	62.7528	36.8949	38.8313	41.7163	100.831	40.2944	1.40492	55.4091	39.3963	1.39639	33.5885	57.5104	35.8709	38.1803	41.0051	31.5127	35.0279	1.53105	41.3166
	85.5	105.925	19.9508	-0.189624	33.1527	22.0135	2.53026	16.0351	38.3656	17.7907	21.4064	21.8899	95.5957	18.7298	0.507259	33.5417	18.6172	0.74447	15.0069	33.2386	17.3422	20.1132	20.7278	117.102	22.2786	1.72081	37.8859	21.8101	0.760621	15.2534	37.3098	18.9476	19.0018	21.6308	104.838	21.9802	1.05413	33.6597	21.8273	1.80904	15.6653	34.3535	17.9639	19.104	21.4081	16.7657	15.7479	0.519942	21.6523
	86	89.4124	7.29801	-0.437634	15.7099	8.67895	3.42725	5.72221	17.8136	7.30061	7.83375	7.93132	80.7041	6.94876	0.642392	15.2877	7.89245	1.07367	6.4198	14.8345	5.6255	7.72809	7.96053	99.2884	7.99757	1.58654	17.596	8.38266	0.803088	4.96669	15.98	6.84507	6.02335	7.58415	90.1262	9.04711	1.2944	14.2713	8.84623	2.18954	5.62412	14.6906	6.9245	6.93421	7.47201	7.21631	5.67048	0.368063	7.66483
	86.5	65.156	1.4683	0.153117	4.09799	2.20579	2.92128	2.37027	4.95887	1.94659	1.99694	1.62029	58.3179	1.85213	0.822615	4.0624	2.44207	1.50812	3.03924	3.95019	1.10067	2.53254	2.32801	73.0609	1.60394	1.29642	4.86684	1.96203	0.695093	1.82078	3.48775	1.67342	1.11788	1.83589	66.4453	3.63618	0.818724	3.12707	3.02563	2.18791	1.99647	3.08458	2.74839	2.14134	2.04595	2.82989	2.49126	0.233006	2.46503
	87	41.0394	0.251107	1.1079	0.418109	0.563294	1.14317	1.7667	0.479287	0.853438	1.58393	0.417423	36.7307	0.625946	1.06759	1.35913	1.34078	1.823	2.42155	0.74485	0.787086	1.59777	2.29866	47.0425	0.200229	0.998442	1.19104	0.579464	0.296329	1.00973	0.481613	0.552684	0.452678	1.18448	42.466	1.85573	0.52736	0.82221	1.41791	1.94082	0.670847	0.00850965	1.55381	0.199869	0.447216	1.45763	1.62771	0.188004	1.7929
	87.5	19.5003	0.388757	1.57646	0.801531	0.438503	0.513389	1.12431	0.441515	0.67301	1.81233	0.505269	17.6178	0.479932	1.28476	1.63334	1.48147	1.47329	1.73506	0.418786	1.97458	1.74971	2.54137	23.3482	0.110404	0.642682	0.969738	0.832218	0.591047	0.900985	0.912935	0.885209	1.16695	1.79401	20.8727	1.22775	1.10279	0.768153	0.571061	1.47255	0.366677	0.52532	1.32609	0.248379	-0.229532	0.860311	1.24537	0.653168	1.34836
	88	5.60627	0.536635	1.38262	1.09511	0.290988	0.318759	0.687547	0.850124	0.595548	1.58374	0.501588	4.73895	0.318318	1.30979	1.66965	0.789662	0.890804	0.696096	0.688701	2.11877	1.29667	1.47062	7.67059	0.579533	0.310743	0.369826	0.777455	1.26156	1.62076	0.619681	0.971195	1.72668	1.57866	6.25885	1.09668	1.72622	0.354651	0.127021	0.805965	0.897401	1.38805	1.12758	0.740172	0.342617	0.480192	1.14891	1.33257	1.31159
	88.5	1.2586	0.616523	1.30519	0.940966	0.443508	-0.458071	0.480153	0.217653	0.797447	1.82433	0.475186	0.693647	-0.00363894	0.992492	1.16286	0.758355	0.448539	0.642884	0.724149	1.29304	0.694031	0.893636	2.91969	1.07072	-0.0735782	-0.471288	1.08504	0.959305	2.19042	-0.278208	0.558367	1.56673	1.02037	1.41185	0.544202	1.67678	-0.108874	0.503897	0.222122	0.94849	1.466	0.662327	0.0106044	0.628605	-0.102003	0.778528	1.64393	1.68132
	89	0.956341	0.909382	0.966671	0.982621	0.575455	-0.443228	0.190796	0.0766626	1.46524	1.71129	0.489518	0.722944	0.0334028	1.01239	0.728934	1.77921	0.461605	1.35838	0.512845	0.689975	0.31232	0.620084	2.69072	1.02046	-0.391327	0.0649194	1.42719	1.36154	2.13864	-0.207997	0.347254	1.35229	1.01517	1.15543	0.188483	1.59766	-0.0968786	0.403152	-0.0383653	0.506789	1.40502	0.755094	0.101715	0.0964651	-0.162072	0.436959	1.69515	1.37771
	89.5	1.13034	1.37816	0.213942	0.86559	0.356827	0.738052	0.275015	1.32355	2.06817	0.771475	0.295961	0.740661	0.505805	1.30212	0.25522	1.78111	0.662933	1.89458	1.00454	0.26095	0.152042	-0.341429	2.36068	1.17553	0.154345	0.797393	1.36047	2.10746	1.85375	0.192185	0.351981	1.08202	0.941619	1.07724	1.01526	1.59751	-0.203324	-0.0443247	0.0773283	0.79051	1.322	1.08197	1.31314	0.46277	0.474062	0.665528	1.86427	1.11561
	90	1.03515	1.59166	0.136303	0.279536	0.0713244	1.5865	0.9017	1.77227	2.24935	0.521635	-0.0906611	0.918271	0.765199	0.944278	-0.352023	1.34472	1.32391	2.45849	1.16871	-0.568802	-0.340834	-0.645665	2.09854	1.6661	0.815214	1.22531	1.19024	2.32478	1.27789	-0.0395481	0.154568	0.658042	0.736466	0.958604	1.40651	1.28822	-0.385448	0.482013	0.563081	0.913109	1.11974	0.921912	1.28306	0.829254	0.790266	1.38301	1.97111	1.19929
	90.5	0.509312	1.69648	0.661008	-0.00108624	0.220311	1.33732	1.26454	1.571	2.00415	0.668193	0.00670232	1.04764	1.02494	0.809504	-0.715059	1.44857	1.88033	2.80307	0.777705	-0.528588	-0.206136	0.295915	2.03808	1.48075	1.21363	2.15832	1.2217	2.10327	0.194162	0.394884	0.278242	0.690247	1.12403	1.00168	1.1153	0.782814	0.644804	0.865295	0.636083	0.586028	0.564036	0.836905	1.26791	0.352025	1.14305	2.18772	1.79125	0.810193
	91	0.277115	1.71369	0.64184	0.00156776	0.42445	1.79464	1.21595	2.31154	1.19329	0.402893	1.02884	0.986705	1.23201	1.20512	-0.202397	1.34708	1.76121	2.60104	0.890407	0.247692	0.537854	1.13511	1.61054	1.05189	1.42752	2.34618	1.04314	1.64366	-0.874478	1.01757	0.91875	1.29855	1.56918	0.815314	1.48132	0.752427	1.88056	0.36492	0.202265	0.826914	0.381057	1.14104	1.96079	0.526632	1.73797	2.27537	1.45154	0.61603
	91.5	0.694265	1.60903	0.54575	0.359155	0.524065	2.14498	1.4329	2.36664	0.54727	0.673465	2.03324	1.24014	1.52871	1.06572	0.425184	0.632079	1.59959	2.2369	1.06433	0.461956	0.995095	1.31605	1.0763	1.23471	1.86583	1.87095	1.28699	1.20177	-1.10369	0.874704	1.51231	1.71574	1.82013	1.16814	1.55837	1.35459	1.9632	0.581078	0.590988	1.41539	0.920017	1.0415	2.02232	1.3131	1.90321	2.15813	1.23054	0.466843
	92	1.07486	1.16163	0.90231	0.877018	1.0588	1.42691	1.72916	1.24164	-0.141322	1.17849	2.33546	1.31025	1.67694	0.58911	1.11104	0.0723931	1.17263	1.97303	0.970618	0.587636	0.835176	1.56704	1.27954	1.37114	1.80455	1.41487	1.48304	0.931183	-0.955675	0.921661	1.57339	1.721	1.75639	1.91231	0.642582	1.38656	1.95996	1.23366	1.47761	1.49845	1.28055	0.837372	1.34445	1.25847	1.25497	2.10544	0.720576	-0.0951338
	92.5	1.08486	0.607309	0.775394	1.34511	1.70504	0.577309	1.32689	0.658096	-0.679912	1.04899	2.63482	1.02739	1.48694	1.20418	1.62107	0.100666	0.869267	1.94624	1.30576	1.36779	1.07091	1.78886	1.54492	0.990054	1.51204	1.01061	1.12938	0.595878	-0.698442	1.54339	1.27691	1.82617	1.75877	1.97218	0.18185	1.38687	2.19647	1.01777	1.2999	1.20874	0.963158	1.4197	1.15382	1.30886	1.06626	1.67166	0.163669	-0.197839
	93	1.71104	0.37633	0.857896	1.56752	1.92456	0.236697	1.29385	0.474936	-0.600192	0.454099	2.63452	1.23992	1.44146	1.83087	1.80705	-0.0942511	1.03917	2.29165	1.94956	1.8872	1.30765	1.12352	1.60357	0.916824	1.60259	0.640906	0.991007	0.458655	0.414008	1.44191	0.926267	1.4007	1.72267	1.85109	0.357307	1.78115	1.11177	0.816269	2.03072	1.34855	0.917867	1.59394	0.928348	1.7038	0.936754	1.31969	0.0551678	0.106635
	93.5	1.60986	0.793945	1.27243	1.89026	2.19726	-0.513183	0.926061	0.391888	-0.107808	0.0861962	1.79474	1.64902	0.837736	1.90795	1.24018	-0.346548	2.90107	2.35017	1.60491	1.81986	0.867678	0.783726	1.54282	1.96619	2.27891	1.246	0.744522	1.40717	0.405281	1.23563	0.461825	0.830635	1.90785	1.68577	0.726194	1.89101	-0.945287	1.3947	1.97554	0.949895	0.490495	1.39067	0.00519528	2.18365	0.43936	2.01953	0.170228	0.0877919
	94	1.30195	0.780461	1.43212	2.11933	2.56168	-1.20903	0.594643	0.379743	-0.0454162	-0.47834	1.09613	1.48122	0.310708	2.53928	0.647789	-0.312717	3.81234	2.44102	1.86186	2.5047	0.911122	0.745972	1.86455	2.07042	2.64062	1.59855	0.526626	1.64716	0.505868	1.71376	-0.000651027	0.660751	2.00607	1.2974	0.939726	1.67057	-1.50687	1.43664	1.28655	0.55072	-0.267583	1.71528	-0.306132	2.29757	0.461757	2.45439	0.269913	0.265023
	94.5	-0.0908153	2.21325	1.45655	2.87956	3.24637	-1.58564	-0.954986	1.73405	0.303621	-1.23026	0.448431	1.78883	-1.51867	3.14291	-0.83533	0.156071	7.62655	2.12716	0.867457	2.68823	0.891195	1.21438	1.28516	4.13942	4.02932	2.94375	0.201447	2.98284	-1.59318	1.76618	-0.385762	1.01389	2.99865	0.570995	2.66475	1.93467	-4.03574	2.08297	-1.78935	-0.418031	-1.56366	2.12379	-1.3786	3.87548	0.267836	3.67382	0.436548	0.692331
	95	-0.798542	1.78611	0.567349	1.74395	1.7025	-0.826705	-1.17244	1.37247	0.292644	-0.817909	-0.0581785	0.921137	-1.58799	1.45201	-1.12784	0.257447	5.24554	0.623945	-0.369066	1.02556	0.322688	0.758411	0.179922	2.98717	2.57168	2.10392	0.0933857	2.06601	-1.96482	0.675152	-0.226118	0.67087	1.87168	0.0529893	2.07472	1.03093	-3.06472	1.37113	-2.37957	-0.716202	-1.23328	1.03025	-1.22985	2.527	-0.0673521	2.2698	0.233755	0.39227
[truncated: 36 more columns]

## Sheet: Melt Curve Plate View Results
		1	2	3	4	5	6	7	8	9	10	11	12
A	Content	Unkn	Unkn	Unkn	Unkn	Unkn	Unkn	Unkn	Unkn	Unkn	Unkn	Unkn
A	Sample
A	Peak 1	85.5	83.5	82	84	83.5	82	83	84	83.5	83.5	83.5
A	Peak 2	None	None	None	None	None	None	None	None	None	None	None
B	Content	Unkn	Unkn	Unkn	Unkn	Unkn	Unkn	Unkn	Unkn	Unkn	Unkn	Unkn
B	Sample
B	Peak 1	85.5	83.5	82	84	83.5	82	83	83.5	83.5	83.5	83.5
B	Peak 2	None	None	None	None	None	None	None	None	None	None	None
C	Content	Unkn	Unkn	Unkn	Unkn	Unkn	Unkn	Unkn	Unkn	Unkn	Unkn	Unkn
C	Sample
C	Peak 1	85.5	83.5	82	84	83.5	82	83	83.5	83.5	83.5	83.5
C	Peak 2	None	None	None	None	None	None	None	None	None	None	None
D	Content	Unkn	Unkn	Unkn	Unkn	Unkn	Unkn	Unkn	Unkn	Unkn	Unkn	Unkn
D	Sample
D	Peak 1	85.5	83.5	82	83.5	83.5	82	83	83.5	83	83.5	83.5
D	Peak 2	None	None	None	None	None	None	None	None	None	None	None
E	Content	Unkn	Unkn	Unkn		Unkn	Unkn	Unkn	Unkn	Unkn	Unkn	Unkn
E	Sample
E	Peak 1	83	83	81.5		83.5	82	83	83.5	82	82	82
E	Peak 2	None	None	None		None	None	None	None	None	None	None
F	Content	Unkn	Unkn	Unkn		Unkn	Unkn	Unkn	Unkn	Unkn	Unkn	Unkn
F	Sample
F	Peak 1	83	83	81.5		83.5	81.5	83	83.5	82	82	81.5
F	Peak 2	None	None	None		None	None	None	None	None	None	None
G	Content	Unkn	Unkn	Unkn		Unkn	Unkn	Unkn	Unkn	Unkn	Unkn	Unkn
G	Sample
G	Peak 1	83	83	81.5		83.5	81.5	83	83.5	82	82	81.5
G	Peak 2	None	None	None		None	None	None	None	None	None	None
H	Content	Unkn	Unkn	Unkn		Unkn	Unkn	Unkn	Unkn	Unkn	Unkn	Unkn
H	Sample
H	Peak 1	83	83	81.5		83.5	82	83	84	82	82	82
H	Peak 2	None	None	None		None	None	None	None	None	None	None

## Sheet: Quantification Amplification
	Cycle	A1	A2	A3	A4	A5	A6	A7	A8	A9	A10	A11	B1	B2	B3	B4	B5	B6	B7	B8	B9	B10	B11	C1	C2	C3	C4	C5	C6	C7	C8	C9	C10	C11	D1	D2	D3	D4	D5	D6	D7	D8	D9	D10	D11	E1	E2	E3	E5
	1	-3.38968	-0.946964	1.35196	3.72003	8.46715	6.50514	-1.11074	6.72107	-1.55465	-4.20413	-0.564642	0.337792	-5.00161	2.26595	2.4075	7.09445	-2.75177	2.03631	-2.7085	-4.44061	-0.121163	1.6614	-3.04274	-1.08356	1.15163	-1.03391	-2.57234	-0.139359	-4.16246	1.08239	-3.72516	-3.09907	-1.94483	-5.3131	-0.520551	-4.7043	0.0235532	-2.60544	-4.78202	-1.49658	-2.34514	2.34064	-1.42846	0.220183	-5.40145	-5.1515	-3.35323	-4.20183
	2	-1.07094	-3.53247	-0.600023	-1.09174	2.37878	-1.38042	1.17842	3.11837	-2.38462	3.12571	-1.27769	0.734966	-7.54159	2.26082	2.20782	0.019863	-5.90799	2.21794	0.188338	-1.8315	1.44046	0.247206	1.72823	-1.21508	-3.19058	0.653139	4.99765	-1.10836	1.07161	0.0855301	-1.36713	0.993534	3.95998	-2.28665	-3.17368	1.0044	0.727569	-2.97805	-2.10887	-0.573365	-2.77483	1.03493	2.74716	3.79059	-0.720984	0.297117	5.98202	-3.2342
	3	-1.10842	-1.75172	-2.2107	-1.9589	2.24786	4.18746	0.141167	2.78852	1.4667	-3.18274	-2.00422	-1.30095	0.93911	-1.01997	3.04854	5.0047	-1.88329	2.2282	-0.466211	3.36773	4.56711	-3.37705	-2.78643	4.05818	3.00157	1.20743	-2.60768	-0.66924	-4.60945	2.96837	0.358607	-1.7123	0.985914	-0.299996	3.11637	-2.30828	-1.58005	0.988772	3.52357	-0.885636	3.20094	2.24028	4.67342	-0.975689	-6.12724	-1.13323	-4.7629	-6.18445
	4	-1.13138	-1.73235	-1.41482	2.11991	-0.880841	0.103164	0.445851	0.960076	-1.49269	3.92462	-1.96736	1.24041	-0.39027	1.31478	-1.72627	1.17965	0.549608	-0.364507	1.95609	-1.2031	-2.15535	-2.43598	-1.60528	2.03295	1.46115	2.55196	0.320065	0.612081	-5.23986	-2.09096	0.244137	5.02446	2.80019	0.477956	-1.96899	-3.49159	1.62391	1.0103	-0.800217	0.445864	0.391719	-1.40494	1.40629	4.7389	-3.11647	0.882224	-0.568405	2.93831
	5	3.17214	4.00778	2.93281	-0.404026	0.606827	0.686959	-2.26233	5.40508	0.583748	2.19314	0.0952058	-0.689059	0.00227179	2.33498	-0.596581	0.719454	-2.76449	4.09194	0.644245	-0.552898	-0.97414	4.39543	0.246349	-2.36021	-4.03815	3.66022	0.474085	0.550798	1.94044	0.397384	0.839923	-1.77093	-1.29089	3.2804	-2.05732	-0.754211	0.00128847	-2.79553	-1.36119	-0.274091	-2.66743	0.129632	-1.78233	-4.23698	-0.446652	0.306954	5.24285	2.89378
	6	0.387408	0.554812	-0.991998	3.85822	-0.760183	4.78304	0.777653	-0.591363	-1.0617	1.89619	0.908198	1.16827	3.10528	-1.89299	-1.03197	-4.18418	-0.18671	-0.487081	1.34524	2.77971	0.193898	3.21817	2.36175	2.26867	0.707809	-1.17733	-0.240573	-0.877921	6.46517	1.07053	4.98704	3.2694	0.195135	-1.28212	-2.25058	-1.91075	4.83518	-2.07668	-3.33058	-1.12581	2.9009	-2.17554	1.9465	4.79267	2.24806	-0.0186926	-0.122801	4.96702
	7	0.127449	1.21855	2.23709	-1.42718	-0.12826	1.47389	0.161378	-0.867959	0.160455	-2.22904	0.984768	1.57838	1.28782	1.44189	0.00572386	1.29948	1.8135	-0.989173	0.375246	-3.55342	0.967127	2.52674	3.76538	-1.6638	1.70479	-0.109083	2.99066	-0.570505	0.0475024	-0.373113	-1.71626	2.48375	7.47909	-0.636485	-0.510784	1.19338	1.71214	0.43004	2.34121	-2.29352	-3.02585	4.34441	6.58257	2.35334	2.60198	-0.975839	-0.492335	2.70054
	8	1.11811	-0.0253306	-0.911951	-1.21545	2.5029	2.15	1.04485	0.354953	-1.7736	3.0502	4.65177	3.54095	0.222461	-1.81218	0.54302	-3.31519	2.82626	-4.27951	-3.04016	4.90761	5.92227	1.53476	-1.33918	-2.1769	1.97957	-2.27563	0.395477	-0.131751	4.37465	-1.43555	0.129159	2.07905	-1.74005	0.654133	3.52985	2.91867	-3.64525	2.70159	1.55655	2.91799	1.24148	-3.61565	-6.37641	0.0192378	0.760351	-0.446652	2.7027	0.460225
	9	2.18599	2.05824	1.92325	2.5858	-0.310419	-8.27359	2.0324	-2.03874	2.24852	-0.680285	1.51856	-2.22882	-0.0160674	-1.37107	0.77908	-0.908078	7.79747	2.54329	-2.47246	-4.91103	-1.99719	-2.48431	0.840827	-1.83485	1.76718	-2.93065	3.48147	1.41176	-1.18758	2.34183	-2.45774	-0.192933	2.4532	-2.15987	-1.76597	3.4189	-2.46767	-1.23655	-2.56996	4.24864	-1.23943	4.02157	-3.54243	-1.8277	2.33743	0.924729	2.09617	-1.22777
	10	1.21645	3.10288	1.48242	-3.34428	1.84657	1.80636	1.53423	-1.96055	-2.34239	1.07343	3.27832	1.89025	-0.00442549	2.67364	2.85529	-1.49907	-2.42115	0.857742	-0.233222	5.97078	4.87776	3.08484	3.07311	-1.03303	0.370422	-1.50761	-1.71664	-2.94923	2.19275	-0.641028	-0.296631	2.34874	-4.22732	2.36577	0.407431	3.49877	0.565183	0.744565	0.0114344	1.41189	0.383009	4.78068	1.68536	-3.1885	6.12335	3.62335	1.21421	-0.495853
	11	-0.503604	-2.07201	1.02994	0.392673	2.45293	-1.77845	-2.85683	3.14238	2.07515	5.57598	2.60535	3.458	-3.42571	-0.369606	-0.789269	1.36934	-1.32811	-1.32698	-1.2949	-1.30979	-0.56926	-0.274781	0.322523	-1.25722	-1.22173	0.297602	0.988326	5.84103	0.983782	2.01843	-5.11977	-3.05329	3.89829	-2.49828	1.70075	4.80216	1.49327	4.13344	3.9474	-2.12193	-1.87328	-2.0479	2.35022	3.35475	-2.20065	3.78506	-0.206458	0.289562
	12	2.40565	-1.04031	2.29913	2.90487	-1.41274	2.2376	1.28754	-3.14395	3.08746	0.570363	1.32668	-3.16696	-3.71591	3.17415	-1.3025	3.13208	0.670879	-2.73679	2.86421	-3.39519	-5.14816	-0.465501	0.609802	2.60913	-3.60502	-2.75086	-1.83019	0.809249	1.06265	-0.174819	2.68335	-1.93176	0.492151	-0.49839	0.677857	-1.28583	1.23783	2.32752	-3.37412	1.18209	2.94423	1.63055	-2.98228	-3.7791	2.16407	-0.156583	0.765578	0.54761
	13	0.476655	1.39836	-1.80966	-0.986493	-3.52813	-13.8797	-0.394083	-2.30201	-0.662095	-3.06685	-3.51527	0.492393	-0.903757	0.696219	1.11556	1.42376	-0.854133	5.5455	1.1717	-4.58605	-2.7708	-1.28796	0.988096	0.346669	-4.64479	2.02659	5.9106	3.62729	2.89082	0.604473	0.661637	-2.51953	-3.53305	2.57979	4.39048	-1.27209	0.942382	-0.952475	2.53436	1.53944	1.33231	-2.10794	-1.35755	1.05357	1.61051	1.22682	6.14298	-0.772358
	14	0.624194	0.759815	-1.15806	2.4344	-1.29209	-2.84026	-0.260757	-4.77543	2.74274	-2.24672	-1.79456	-3.92378	2.85589	1.08492	1.99539	1.93814	-1.60368	-0.729396	6.39519	-1.81906	1.59353	-3.47762	-0.842392	0.00530029	1.52058	5.4876	-0.444845	2.19979	-2.96099	3.31682	0.310906	-4.00281	-1.5224	0.188226	4.31508	2.58286	6.05323	-1.0352	2.43311	0.490806	2.61265	-4.20229	2.95008	0.627326	0.597237	-0.939643	-2.76082	-2.50007
	15	1.00891	-0.286475	0.520103	7.01166	1.56277	2.25407	4.09444	13.0316	-0.519771	0.69045	-1.14041	0.472235	-3.58899	2.22298	9.06893	0.741275	-2.19535	-2.57281	13.0271	1.78928	-2.99952	0.0786864	2.11338	0.0577643	-1.15162	7.84422	0.628362	-0.821097	-0.921986	16.3784	1.15656	0.130053	-4.75774	0.648902	-0.665661	-0.230993	8.19154	-1.36876	-1.27218	-0.268922	14.7034	0.541505	-5.10508	0.278923	-1.09975	-0.725538	-0.381576	-0.965356
	16	-4.05202	0.744679	-1.0774	18.8877	-2.3952	0.522865	-0.244035	10.7687	-1.24512	-2.4344	-0.406544	-1.8665	1.65662	-1.46555	18.8387	-3.0712	0.106388	-2.23362	25.0238	2.66196	-1.92354	0.361282	2.04459	1.79286	1.20054	21.2876	-0.757142	-3.77519	2.57589	23.1271	0.567612	-0.44606	0.172186	3.01719	-0.293361	-0.965941	19.3106	-0.98011	0.165478	-0.752245	26.2553	-0.632745	-1.3507	-0.660538	0.240391	-0.840426	-0.0806297	0.896513
	17	-1.86497	-0.59119	-2.26654	34.1573	2.3669	3.3958	-3.10978	35.3871	2.51481	-1.66691	0.0121921	3.27943	0.340171	2.77736	44.7446	-0.887486	-0.0782122	0.301793	42.3602	-1.19807	-2.39934	2.98431	-0.640117	-0.351438	-0.800568	43.5031	0.791459	3.8448	1.48479	51.6277	1.25569	-0.862467	-5.82553	-1.53087	-3.39272	2.32346	47.3953	0.751445	-1.31681	-1.44579	46.9196	1.37601	-0.607022	-4.49384	2.48863	-0.522063	-3.0393	-4.36807
	18	-0.297357	-2.41325	1.58008	72.6903	1.60425	0.560199	2.53446	72.2225	-1.60253	-1.30778	-4.88302	1.74324	2.19257	-4.75117	77.1202	-2.25449	-1.18286	-1.51485	81.1575	-0.101632	-2.94187	0.0979431	-1.20865	0.253405	0.0133479	87.4422	-5.21072	-0.385711	-0.158388	99.1718	3.9421	1.98049	-2.70982	-1.89916	1.8837	-3.9498	85.0935	3.00921	3.63094	-0.0890276	84.9313	-2.07291	-3.743	-0.055062	2.50038	0.980106	-3.40889	-0.269111
	19	-1.22755	-1.63135	0.745718	115.3	-1.28752	-0.735546	-1.25169	133.44	-2.76112	-4.27414	2.16402	-1.55433	1.46785	-2.65335	131.713	-1.41186	2.22486	-1.59571	137.311	3.90207	-2.58901	0.498037	-0.475254	1.72631	2.18116	152.257	1.34814	-0.340789	-2.80165	166.524	-0.288093	-4.59059	4.15474	-3.40905	-0.926992	1.61548	146.818	-1.71672	-3.32133	0.493849	148.389	-1.89229	-2.23679	3.84458	-0.682572	2.57489	-2.18693	2.97495
	20	-1.92167	-2.38806	-0.614846	165.63	-0.879662	-4.7685	2.0376	194.065	1.66996	-3.90183	4.1072	0.907358	1.40012	-0.766001	182.509	-3.85714	2.11871	-1.92731	187.963	1.36836	1.85285	1.71422	2.33625	1.29167	2.24425	212.027	2.02746	3.17457	-0.697064	227.473	-2.20421	2.92102	6.83562	1.74681	-0.89655	-2.28989	201.656	-0.104851	3.44137	0.522216	206.683	5.73077	6.18722	3.06201	0.709546	13.9539	-0.280638	4.19215
	21	-0.800525	0.550339	1.01012	200.841	3.67229	1.27332	-0.591514	237.384	2.39117	3.4019	4.93337	-5.28399	5.6207	-2.79715	221.803	0.19417	-0.89257	0.306199	226.656	8.05416	11.0166	7.33656	-2.03292	6.67015	1.36138	258.741	-0.988951	-2.63267	-0.092357	274.828	2.00756	7.43552	4.26985	2.61645	-1.06394	0.683203	242.155	0.718927	-1.52643	1.84146	252.791	0.887888	6.98256	1.95205	-0.6185	29.9354	-1.70259	7.26485
	22	2.04413	5.92207	-0.744647	224.391	0.529432	6.81597	5.48719	264.575	10.3081	10.1933	11.4407	-0.374759	12.8517	0.840127	248.436	8.71777	-0.0896597	7.40535	252.698	13.5312	11.4215	12.6561	-0.943763	7.8932	-0.349843	288.947	6.68749	-0.418007	5.16935	307.037	10.8895	13.3307	9.97683	2.47277	5.79135	-1.03767	268.841	7.67182	3.44902	8.23618	279.685	8.18386	14.8933	16.0701	-2.02627	64.6576	3.4394	11.6272
	23	5.42541	8.75494	5.69233	243.066	14.4569	1.90206	12.0506	286.589	26.2444	19.4165	25.2463	6.38633	18.5177	5.92346	267.661	7.19258	5.26312	10.5845	272.515	24.2272	28.4613	27.6537	4.03766	20.1095	3.23841	311.386	11.8641	1.33505	10.9416	331.864	27.634	28.2731	24.8103	5.6294	14.8684	0.987324	289.053	13.0716	1.71594	16.1951	300.487	22.6979	25.263	31.8304	0.641711	105.56	4.19976	27.5345
	24	8.82177	26.8696	6.08119	261.259	23.1507	10.5868	24.7954	306.771	40.5907	48.2081	51.2174	6.79772	30.9571	5.23395	287.807	25.3678	12.5096	25.7326	292.898	47.7734	46.5815	50.2661	13.3063	37.7317	10.1276	333.219	30.6794	15.5565	32.6674	355.359	48.1924	49.5809	53.8469	13.4165	28.2473	10.9973	309.305	28.9927	11.7146	33.5307	321.266	45.9193	54.0835	51.5776	-3.19885	182.272	8.5392	59.552
	25	21.7531	53.6638	19.3846	276.037	43.2208	26.9657	47.64	323.061	77.939	84.4308	91.3908	20.7671	57.126	18.8269	303.367	50.0395	26.8314	44.4835	308.56	87.9817	93.7644	89.6596	21.3649	66.3613	20.6469	351.589	47.1009	23.9261	55.0638	374.777	87.1633	98.5581	94.3244	26.3321	57.8805	18.5864	326.29	51.2792	27.4343	61.9928	339.204	84.9874	95.6614	99.7956	0.955355	258.217	32.4073	108.903
	26	41.1936	96.0423	30.0967	286.704	90.104	46.6844	94.2098	335.146	135.986	150.445	155.354	40.26	104.14	33.5626	316.64	83.5753	46.2811	90.5615	321.85	156.415	160.801	157.323	47.2564	124.518	40.8436	364.533	98.9893	45.8399	105.485	389.597	154.127	168.914	166.833	57.9741	105.385	41.0752	340.601	93.594	45.4933	101.961	353.658	155.419	165.28	168.67	7.04425	325.202	58.4719	180.597
	27	81.7274	155.963	55.2479	295.183	149.499	74.2793	160.11	345.303	195.326	222.424	224.678	76.2168	169.423	59.5953	326.795	142.939	83.1432	156.489	330.603	224.91	232.418	226.884	89.6781	193.306	73.2327	374.596	169.658	89.7158	179.306	400.633	223.883	242.453	241.472	99.4665	179.73	69.7584	350.406	164.67	82.4508	171.344	363.241	228.179	239.261	240.897	14.4461	373.636	107.155	257.113
	28	148.879	216.713	96.6671	302.527	210.581	120.256	227.812	353.557	248.511	289.507	293.704	138.494	233.624	98.8974	333.816	201.062	127.195	224.179	339.496	286.597	299.568	291.987	165.696	268.906	125.51	382.871	239.774	142.482	255.712	408.526	287.085	309.767	311.745	169.628	253.445	119.11	356.774	234.496	132.047	242.914	371.951	295.079	308.253	308.596	26.505	401.598	182.947	328.917
	29	223.163	269.927	119.128	307.517	265.829	150.711	290.224	359.58	286.857	342.063	346.924	207.048	287.87	134.964	340.246	252.619	161.41	285.836	345.045	334.603	349.455	341.458	251.446	331.552	167.705	389.309	298.703	183.645	324.071	415.241	332.732	361.698	364.926	245.913	314.096	158.744	360.661	297.116	169.32	308.383	377.787	346.806	359.904	358.59	55.4754	417.294	256.99	382.029
	30	298.328	310.034	140.418	310.792	303.858	174.445	333.33	366.028	313.127	375.906	383.503	272.889	326.839	164.978	342.48	290.056	188.15	329.197	351.26	366.395	382.075	373.684	338.358	376.773	202.281	393.468	344.823	214.664	371.875	421.012	359.971	394.316	400.967	319.296	360.523	191.096	366.092	341.767	199.409	356.308	383.364	378.961	392.902	390.667	99.2145	426.284	324.677	416.725
	31	360.622	334.413	159.024	312.876	329.533	196.096	359.936	369.692	329.082	397.491	403.187	327.792	352.306	187.771	344.991	315.618	210.231	356.171	354.853	385.833	404.929	392.365	411.347	404.459	229.79	397.407	372.55	240.948	399.913	425.066	377.918	417.557	421.973	377.915	389.493	216.702	370.146	371.773	222.777	383.73	387.42	399.434	414.252	409.761	174.117	434.388	371.524	438.113
	32	402.923	350.617	179.621	315.305	345.718	223.473	374.105	372.809	340.032	413.018	420.43	363.807	367.841	212.261	347.068	330.712	233.451	371.262	359.179	397.494	422.224	406.469	462.01	422.752	258.567	401.329	393.057	268.18	415.466	429.238	392.602	432.842	438.174	416.4	412.23	244.749	374.87	391.245	248.109	398.594	390.69	412.577	430.847	424.47	252.267	440.455	402.204	454.284
	33	429.412	360.367	198.39	320.01	359.554	242.871	384.277	372.927	345.378	424.407	429.931	389.288	379.942	234.34	351.02	342.119	254.641	381.372	362.496	406.389	434.232	416.338	493.653	433.172	287.207	404.286	404.503	294.395	428.425	432.993	402.531	444.229	448.382	440.612	423.938	270.066	376.75	406.039	269.553	407.807	393.303	422.173	438.819	434.13	325.696	447.559	419.071	464.252
	34	445.573	366.826	213.797	321.822	366.232	258.912	391.543	374.506	350.51	434.363	437.665	404.125	387.414	253.512	355.315	349.357	271.444	389.024	364.84	412.668	442.374	422.196	513.806	440.317	308.646	404.916	412.924	313.964	435.18	436.196	409.351	450.514	456.859	456.171	431.706	291.476	378.879	413.482	290.813	414.903	395.745	429.061	445.261	440.971	380.359	449.298	431.919	471.976
	35	456.706	371.36	225.632	322.603	370.599	272.844	395.288	375.272	353.99	438.116	441.867	414.276	391.906	268.928	357.549	354.93	284.481	394.733	366.045	418.363	446.694	426.402	526.748	445.318	327.244	407.878	416.479	330.28	440.432	440.096	412.897	455.541	458.757	466.378	435.164	307.969	380.556	418.764	306.594	419.93	399.411	431.696	448.302	444.397	415.449	451.314	439.264	475.565
	36	466.13	374.732	234.507	323.227	374.549	284.479	399.353	375.623	356.531	438.984	444.648	421.481	395.714	282.901	358.28	359.095	295.529	398.909	367.53	420.722	449.436	427.684	537.064	451.166	341.107	409.652	420.63	343.239	443.264	443.667	415.566	459.547	462.495	474.524	439.323	324.084	383.908	421.152	322.207	424.601	401.31	433.766	452.101	446.601	437.327	449.844	443.108	478.331
	37	472.498	379.275	243.803	324.793	377.36	293.449	401.687	377.521	357.043	437.788	447.188	427.24	398.444	293.069	359.247	359.631	307.347	401.843	370.764	424.072	450.608	427.94	543.904	453.993	354.05	413.236	424.606	353.874	447.109	444.652	416.438	462.82	465.391	479.614	442.825	333.887	386.752	424.817	330.277	429.541	402.897	436.73	452.511	448.374	448.728	453.249	445.426	479.835
	38	476.197	381.039	251.459	328.095	379.149	299.631	406.331	378.371	357.835	439.113	446.076	432.67	401.918	301.809	361.376	361.403	316.325	405.247	372.875	423.412	449.618	428.38	548.176	457	363.437	412.59	427.381	362.69	451.406	443.677	415.916	462.868	466.644	484.074	445.226	345.076	387.571	426.333	338.601	431.648	403.03	438.922	451.724	448.491	456.737	453.963	447.801	479.44
	39	476.985	379.852	257.784	328.754	377.892	307.409	408.055	378.875	358.215	439.718	445.832	435.82	402.206	307.177	363.216	360.764	322.835	408.611	372.721	425.933	448.332	429.505	550.084	457.863	372.426	414.088	427.456	370.55	453.321	444.535	415.205	461.802	467.042	485.118	447.356	352.073	386.439	426.762	343.089	432.51	405.582	439.918	451.648	449.177	461.396	455.816	450.391	479.436
	40	477.176	375.133	262.442	328.738	377.411	313.289	409.63	376.674	359.572	440.486	445.216	437.55	401.591	313.199	363.293	361.322	327.136	410.766	369.853	430.169	446.865	431.847	551.62	459.778	381.7	414.7	424.137	378.862	455.263	449.983	413.811	460.008	469.399	484.646	449.819	358.96	385.482	427.31	350.751	431.278	408.805	437.719	451.681	450.36	465.34	455.995	452.117	480.728
[truncated: 36 more columns]

## Sheet: Quantification Cq Results
	Well	Fluor	Target	Content	Sample	Biological Set Name	Cq	Cq Mean	Cq Std. Dev	Starting Quantity (SQ)	Log Starting Quantity	SQ Mean	SQ Std. Dev	Set Point	Well Note
	A01	SYBR	7	Unkn	Untreated		25.8012	25.8012	0				0	60
	A02	SYBR	16	Unkn	Untreated		24.3903	24.3903	0				0	60
	A03	SYBR	73	Unkn	Untreated		26.2875	26.2875	0				0	60
	A04	SYBR	G	Unkn	Untreated		17.0823	17.0823	0				0	60
	A05	SYBR	16	Unkn	CA		24.7064	24.7064	0				0	60
	A06	SYBR	73	Unkn	CA		25.5255	25.5255	0				0	60
	A07	SYBR	42	Unkn	CA		24.5486	24.5486	0				0	60
	A08	SYBR	G	Unkn	CA		17.0527	17.0527	0				0	60
	A09	SYBR	16	Unkn	MeJA-6h		23.7726	23.7726	0				0	60
	A10	SYBR	16	Unkn	MeJA-12h		23.6221	23.6221	0				0	60
	A11	SYBR	16	Unkn	MeJA-24h		23.4652	23.4652	0				0	60
	B01	SYBR	7	Unkn	Untreated		25.8496	25.8496	0				0	60
	B02	SYBR	16	Unkn	Untreated		24.2434	24.2434	0				0	60
	B03	SYBR	73	Unkn	Untreated		26.1446	26.1446	0				0	60
	B04	SYBR	G	Unkn	Untreated		16.7137	16.7137	0				0	60
	B05	SYBR	16	Unkn	CA		24.4848	24.4848	0				0	60
	B06	SYBR	73	Unkn	CA		25.5397	25.5397	0				0	60
	B07	SYBR	42	Unkn	CA		24.6184	24.6184	0				0	60
	B08	SYBR	G	Unkn	CA		16.7097	16.7097	0				0	60
	B09	SYBR	16	Unkn	MeJA-6h		23.5564	23.5564	0				0	60
	B10	SYBR	16	Unkn	MeJA-12h		23.4893	23.4893	0				0	60
	B11	SYBR	16	Unkn	MeJA-24h		23.4278	23.4278	0				0	60
	C01	SYBR	7	Unkn	Untreated		25.6165	25.6165	0				0	60
	C02	SYBR	16	Unkn	Untreated		23.9771	23.9771	0				0	60
	C03	SYBR	73	Unkn	Untreated		25.8259	25.8259	0				0	60
	C04	SYBR	G	Unkn	Untreated		16.722	16.722	0				0	60
	C05	SYBR	16	Unkn	CA		24.4049	24.4049	0				0	60
	C06	SYBR	73	Unkn	CA		25.6116	25.6116	0				0	60
	C07	SYBR	42	Unkn	CA		24.2081	24.2081	0				0	60
	C08	SYBR	G	Unkn	CA		16.9983	16.9983	0				0	60
	C09	SYBR	16	Unkn	MeJA-6h		23.4715	23.4715	0				0	60
	C10	SYBR	16	Unkn	MeJA-12h		23.4249	23.4249	0				0	60
	C11	SYBR	16	Unkn	MeJA-24h		23.4311	23.4311	0				0	60
	D01	SYBR	7	Unkn	Untreated		25.3475	25.3475	0				0	60
	D02	SYBR	16	Unkn	Untreated		24.3064	24.3064	0				0	60
	D03	SYBR	73	Unkn	Untreated		25.8334	25.8334	0				0	60
	D04	SYBR	G	Unkn	Untreated		16.6415	16.6415	0				0	60
	D05	SYBR	16	Unkn	CA		24.374	24.374	0				0	60
	D06	SYBR	73	Unkn	CA		25.5478	25.5478	0				0	60
	D07	SYBR	42	Unkn	CA		24.1334	24.1334	0				0	60
	D08	SYBR	G	Unkn	CA		16.9358	16.9358	0				0	60
	D09	SYBR	16	Unkn	MeJA-6h		23.63	23.63	0				0	60
	D10	SYBR	16	Unkn	MeJA-12h		23.4186	23.4186	0				0	60
	D11	SYBR	16	Unkn	MeJA-24h		23.2784	23.2784	0				0	60
	E01	SYBR	10	Unkn	Untreated		28.3736	28.3736	0				0	60
	E02	SYBR	42	Unkn	Untreated		21.2129	21.2129	0				0	60
	E03	SYBR	82	Unkn	Untreated		25.1888	25.1888	0				0	60
	E05	SYBR	16	Unkn	DA		23.3059	23.3059	0				0	60
	E06	SYBR	73	Unkn	DA		23.2279	23.2279	0				0	60
	E07	SYBR	42	Unkn	DA		18.4021	18.4021	0				0	60
	E08	SYBR	G	Unkn	DA		16.6567	16.6567	0				0	60
	E09	SYBR	73	Unkn	MeJA-6h		26.5195	26.5195	0				0	60
	E10	SYBR	73	Unkn	MeJA-12h		26.0083	26.0083	0				0	60
	E11	SYBR	73	Unkn	MeJA-24h		23.1881	23.1881	0				0	60
	F01	SYBR	10	Unkn	Untreated		28.4567	28.4567	0				0	60
	F02	SYBR	42	Unkn	Untreated		21.0881	21.0881	0				0	60
	F03	SYBR	82	Unkn	Untreated		25.2041	25.2041	0				0	60
	F05	SYBR	16	Unkn	DA		23.242	23.242	0				0	60
	F06	SYBR	73	Unkn	DA		23.2623	23.2623	0				0	60
	F07	SYBR	42	Unkn	DA		18.4782	18.4782	0				0	60
	F08	SYBR	G	Unkn	DA		16.5241	16.5241	0				0	60
	F09	SYBR	73	Unkn	MeJA-6h		26.3779	26.3779	0				0	60
	F10	SYBR	73	Unkn	MeJA-12h		25.7923	25.7923	0				0	60
	F11	SYBR	73	Unkn	MeJA-24h		23.3133	23.3133	0				0	60
	G01	SYBR	10	Unkn	Untreated		27.8649	27.8649	0				0	60
	G02	SYBR	42	Unkn	Untreated		21.013	21.013	0				0	60
	G03	SYBR	82	Unkn	Untreated		25.1315	25.1315	0				0	60
	G05	SYBR	16	Unkn	DA		23.2755	23.2755	0				0	60
	G06	SYBR	73	Unkn	DA		23.0605	23.0605	0				0	60
	G07	SYBR	42	Unkn	DA		18.3779	18.3779	0				0	60
	G08	SYBR	G	Unkn	DA		16.2618	16.2618	0				0	60
	G09	SYBR	73	Unkn	MeJA-6h		26.1204	26.1204	0				0	60
	G10	SYBR	73	Unkn	MeJA-12h		25.5816	25.5816	0				0	60
	G11	SYBR	73	Unkn	MeJA-24h		23.063	23.063	0				0	60
	H01	SYBR	10	Unkn	Untreated		28.3232	28.3232	0				0	60
	H02	SYBR	42	Unkn	Untreated		21.0595	21.0595	0				0	60
	H03	SYBR	82	Unkn	Untreated		25.0943	25.0943	0				0	60
	H05	SYBR	16	Unkn	DA		23.3	23.3	0				0	60
	H06	SYBR	73	Unkn	DA		23.0301	23.0301	0				0	60
	H07	SYBR	42	Unkn	DA		18.6047	18.6047	0				0	60
	H08	SYBR	G	Unkn	DA		16.3053	16.3053	0				0	60
	H09	SYBR	73	Unkn	MeJA-6h		26.4075	26.4075	0				0	60
	H10	SYBR	73	Unkn	MeJA-12h		26.058	26.058	0				0	60
	H11	SYBR	73	Unkn	MeJA-24h		23.3015	23.3015	0				0	60

## Sheet: Melt Curve Peak Results
	Well	Fluor	Target	Content	Sample	Melt Temperature	Peak Height	Begin Temperature	End Temperature	Well Note
	A01	SYBR	7	Unkn	Untreated	85.5	105.925	80.5	89
	A02	SYBR	16	Unkn	Untreated	83.5	82.6176	73	87
	A03	SYBR	73	Unkn	Untreated	82	64.1469	78	85
	A04	SYBR	G	Unkn	Untreated	84	85.6483	80.5	87
	A05	SYBR	16	Unkn	CA	83.5	83.9519	80	87
	A06	SYBR	73	Unkn	CA	82	75.4087	78.5	85
	A07	SYBR	42	Unkn	CA	83	99.1935	79.5	89
	A08	SYBR	G	Unkn	CA	84	104.243	80.5	87
	A09	SYBR	16	Unkn	MeJA-6h	83.5	75.7785	77.5	87.5
	A10	SYBR	16	Unkn	MeJA-12h	83.5	93.0939	79.5	87
	A11	SYBR	16	Unkn	MeJA-24h	83.5	92.4661	77.5	87
	B01	SYBR	7	Unkn	Untreated	85.5	95.5957	81.5	88.5
	B02	SYBR	16	Unkn	Untreated	83.5	83.9695	79.5	88.5
	B03	SYBR	73	Unkn	Untreated	82	75.1347	78	85.5
	B04	SYBR	G	Unkn	Untreated	84	90.9427	80.5	87
	B05	SYBR	16	Unkn	CA	83.5	73.8502	79	87
	B06	SYBR	73	Unkn	CA	82	79.1373	78.5	85
	B07	SYBR	42	Unkn	CA	83	93.9332	74	88
	B08	SYBR	G	Unkn	CA	83.5	91.7744	80.5	87.5
	B09	SYBR	16	Unkn	MeJA-6h	83.5	87.4993	72.5	87
	B10	SYBR	16	Unkn	MeJA-12h	83.5	91.7839	72.5	87
	B11	SYBR	16	Unkn	MeJA-24h	83.5	90.0207	72	86.5
	C01	SYBR	7	Unkn	Untreated	85.5	117.102	79	91.5
	C02	SYBR	16	Unkn	Untreated	83.5	97.7699	79.5	87
	C03	SYBR	73	Unkn	Untreated	82	89.0773	78.5	88.5
	C04	SYBR	G	Unkn	Untreated	84	104.202	78	88
	C05	SYBR	16	Unkn	CA	83.5	90.5975	79.5	87
	C06	SYBR	73	Unkn	CA	82	92.3785	78.5	85.5
	C07	SYBR	42	Unkn	CA	83	108.522	73.5	87
	C08	SYBR	G	Unkn	CA	83.5	114.77	80	87
	C09	SYBR	16	Unkn	MeJA-6h	83.5	89.3171	73	87
	C10	SYBR	16	Unkn	MeJA-12h	83.5	96.203	78.5	87
	C11	SYBR	16	Unkn	MeJA-24h	83.5	99.3559	79.5	87
	D01	SYBR	7	Unkn	Untreated	85.5	104.838	80	89
	D02	SYBR	16	Unkn	Untreated	83.5	91.6122	78.5	89
	D03	SYBR	73	Unkn	Untreated	82	83.848	78.5	85.5
	D04	SYBR	G	Unkn	Untreated	83.5	97.6403	79.5	88.5
	D05	SYBR	16	Unkn	CA	83.5	88.0726	79.5	88
	D06	SYBR	73	Unkn	CA	82	84.8992	77.5	85
	D07	SYBR	42	Unkn	CA	83	102.431	73	87.5
	D08	SYBR	G	Unkn	CA	83.5	101.761	78.5	87
	D09	SYBR	16	Unkn	MeJA-6h	83	89.3929	78.5	88.5
	D10	SYBR	16	Unkn	MeJA-12h	83.5	92.7047	78	87
	D11	SYBR	16	Unkn	MeJA-24h	83.5	94.6139	72.5	87.5
	E01	SYBR	10	Unkn	Untreated	83	86.8222	78	88.5
	E02	SYBR	42	Unkn	Untreated	83	109.749	79	89
	E03	SYBR	82	Unkn	Untreated	81.5	106.844	73	86
	E05	SYBR	16	Unkn	DA	83.5	97.809	72	87.5
	E06	SYBR	73	Unkn	DA	82	94.8911	77.5	85
	E07	SYBR	42	Unkn	DA	83	113.262	79	89
	E08	SYBR	G	Unkn	DA	83.5	115.246	80	87
	E09	SYBR	73	Unkn	MeJA-6h	82	89.275	78	86.5
	E10	SYBR	73	Unkn	MeJA-12h	82	92.1814	78.5	85
	E11	SYBR	73	Unkn	MeJA-24h	82	96.9315	72	85
	F01	SYBR	10	Unkn	Untreated	83	80.8564	77.5	88
	F02	SYBR	42	Unkn	Untreated	83	111.43	79	87.5
	F03	SYBR	82	Unkn	Untreated	81.5	103.819	77.5	86
	F05	SYBR	16	Unkn	DA	83.5	91.0435	79	87.5
	F06	SYBR	73	Unkn	DA	81.5	95.6578	77	85
	F07	SYBR	42	Unkn	DA	83	106.357	79.5	88.5
	F08	SYBR	G	Unkn	DA	83.5	104.031	80	87
	F09	SYBR	73	Unkn	MeJA-6h	82	90.2894	77	85.5
	F10	SYBR	73	Unkn	MeJA-12h	82	83.0339	78.5	85
	F11	SYBR	73	Unkn	MeJA-24h	81.5	86.1546	78	86
	G01	SYBR	10	Unkn	Untreated	83	99.216	77	87
	G02	SYBR	42	Unkn	Untreated	83	123.151	79.5	87.5
	G03	SYBR	82	Unkn	Untreated	81.5	117.897	72	85.5
	G05	SYBR	16	Unkn	DA	83.5	102.289	73	87.5
	G06	SYBR	73	Unkn	DA	81.5	102.117	78.5	85.5
	G07	SYBR	42	Unkn	DA	83	120.219	78.5	87.5
	G08	SYBR	G	Unkn	DA	83.5	123.406	80	87
	G09	SYBR	73	Unkn	MeJA-6h	82	102.825	71.5	85
	G10	SYBR	73	Unkn	MeJA-12h	82	99.2969	71.5	85
	G11	SYBR	73	Unkn	MeJA-24h	81.5	98.6059	71.5	87
	H01	SYBR	10	Unkn	Untreated	83	86.7231	77.5	87.5
	H02	SYBR	42	Unkn	Untreated	83	112.251	79	88.5
	H03	SYBR	82	Unkn	Untreated	81.5	108.626	77.5	86.5
	H05	SYBR	16	Unkn	DA	83.5	96.0458	71.5	87
	H06	SYBR	73	Unkn	DA	82	102.78	77.5	85
	H07	SYBR	42	Unkn	DA	83	111.812	79	89
	H08	SYBR	G	Unkn	DA	84	108.134	80	87.5
	H09	SYBR	73	Unkn	MeJA-6h	82	97.5921	78.5	85.5
	H10	SYBR	73	Unkn	MeJA-12h	82	91.1513	78	85
	H11	SYBR	73	Unkn	MeJA-24h	82	95.5969	78.5	85

## Sheet: Melt Curve RFU Results
	Temperature	A1	A2	A3	A4	A5	A6	A7	A8	A9	A10	A11	B1	B2	B3	B4	B5	B6	B7	B8	B9	B10	B11	C1	C2	C3	C4	C5	C6	C7	C8	C9	C10	C11	D1	D2	D3	D4	D5	D6	D7	D8	D9	D10	D11	E1	E2	E3	E5
	65	2775.91	2658.3	2552.05	2628.84	2659.84	2689.75	2702.48	2715.22	2622.5	2718.06	2749.32	2726.19	2661.89	2626.46	2671.36	2635.43	2624.88	2737.1	2669.52	2695.84	2734.54	2732.25	2840.6	2726.57	2666.54	2710.06	2709.11	2673.29	2710.75	2740.9	2692.04	2742.55	2762.49	2765	2720.89	2651.31	2705.69	2679.14	2651.15	2692.05	2696.88	2732.41	2780.19	2740.93	2764.77	2781.38	2723.22	2745.37
	65.5	2775.22	2657.42	2551.61	2628.38	2658.8	2689.27	2701.66	2714.66	2621.77	2715.6	2746.48	2724.93	2660.45	2626.08	2670.75	2634.33	2623.89	2735.96	2668.69	2694.34	2732.42	2729.57	2838.86	2725.15	2665.87	2709.05	2707.54	2672.11	2709.48	2740.49	2690.41	2740.78	2759.58	2764.9	2719.09	2650.29	2704.39	2678.03	2650.43	2691.41	2696.89	2731.27	2778.13	2739.15	2763.84	2780.86	2722.46	2743.73
	66	2774.54	2656.54	2551.17	2627.93	2657.77	2688.79	2700.83	2714.1	2621.04	2713.14	2743.64	2723.67	2659.01	2625.69	2670.14	2633.22	2622.91	2734.82	2667.86	2692.84	2730.29	2726.89	2837.12	2723.72	2665.21	2708.05	2705.98	2670.93	2708.21	2740.08	2688.78	2739.02	2756.66	2764.8	2717.29	2649.26	2703.08	2676.92	2649.71	2690.77	2696.89	2730.12	2776.07	2737.38	2762.92	2780.34	2721.7	2742.1
	66.5	2773.86	2655.65	2550.73	2627.47	2656.73	2688.31	2700	2713.55	2620.3	2710.68	2740.8	2722.41	2657.58	2625.3	2669.54	2632.11	2621.92	2733.68	2667.03	2691.34	2728.17	2724.21	2835.38	2722.3	2664.55	2707.05	2704.41	2669.75	2706.94	2739.67	2687.16	2737.25	2753.74	2764.7	2715.48	2648.24	2701.77	2675.81	2648.99	2690.12	2696.89	2728.98	2774.01	2735.6	2761.99	2779.82	2720.94	2740.47
	67	2773.17	2654.77	2550.29	2627.02	2655.69	2687.83	2699.17	2712.99	2619.57	2708.22	2737.96	2721.15	2656.14	2624.91	2668.93	2631	2620.93	2732.54	2666.21	2689.84	2726.05	2721.53	2833.64	2720.87	2663.88	2706.04	2702.84	2668.57	2705.66	2739.27	2685.53	2735.49	2750.82	2764.6	2713.68	2647.21	2700.47	2674.7	2648.27	2689.48	2696.9	2727.83	2771.94	2733.82	2761.06	2779.3	2720.18	2738.84
	67.5	2772.49	2653.89	2549.85	2626.56	2654.65	2687.35	2698.34	2712.43	2618.84	2705.76	2735.12	2719.89	2654.7	2624.52	2668.32	2629.89	2619.94	2731.4	2665.38	2688.34	2723.93	2718.85	2831.9	2719.45	2663.22	2705.04	2701.28	2667.39	2704.39	2738.86	2683.9	2733.72	2747.9	2764.5	2711.87	2646.19	2699.16	2673.59	2647.55	2688.84	2696.9	2726.69	2769.88	2732.04	2760.13	2778.78	2719.41	2737.21
	68	2771.8	2653.01	2549.41	2626.11	2653.62	2686.87	2697.51	2711.87	2618.11	2703.3	2732.29	2718.63	2653.26	2624.14	2667.71	2628.78	2618.96	2730.26	2664.55	2686.84	2721.81	2716.17	2830.16	2718.02	2662.56	2704.03	2699.71	2666.2	2703.12	2738.45	2682.27	2731.96	2744.98	2764.4	2710.07	2645.17	2697.86	2672.48	2646.83	2688.19	2696.9	2725.54	2767.82	2730.27	2759.2	2778.26	2718.65	2735.58
	68.5	2771.98	2652.28	2549.35	2625.61	2653.02	2686.3	2697	2712.02	2617.55	2701.61	2729.82	2717.84	2652.2	2623.89	2667.46	2628.11	2618.22	2729.29	2664.54	2685.53	2719.77	2713.7	2828.65	2716.79	2661.74	2703.27	2698.52	2664.82	2702.4	2738.7	2680.74	2730.43	2742.96	2764.9	2708.79	2644.2	2696.83	2671.99	2645.98	2687.75	2697.45	2724.55	2766.26	2728.85	2758.82	2778.13	2718.51	2734.27
	69	2772.66	2651.86	2549.26	2625.81	2653.17	2685.94	2697.31	2712.49	2617.72	2700.63	2727.8	2717.6	2651.82	2623.41	2667.64	2627.81	2617.55	2728.78	2664.38	2684.79	2718.09	2711.56	2828.11	2715.71	2661.1	2702.63	2698.09	2663.66	2702.64	2739	2679.57	2729.04	2741.27	2765.89	2707.89	2643.63	2695.76	2672.21	2645.27	2687.76	2698.35	2724.19	2765.05	2728.16	2758.87	2778.44	2718.7	2733.81
	69.5	2773.95	2652.01	2548.99	2626.26	2653.74	2685.67	2697.96	2713.52	2617.97	2699.86	2726.18	2718.11	2651.79	2622.8	2668.02	2627.88	2617.17	2728.76	2664.56	2684.07	2716.53	2710.31	2828.46	2715.61	2660.4	2702.33	2698.42	2662.79	2703.43	2739.78	2678.95	2728.03	2739.9	2767.56	2707.91	2643.69	2695.51	2672.78	2645	2687.79	2699.78	2724.53	2764.38	2727.09	2759.48	2779.42	2719.16	2734.1
	70	2775.99	2652.94	2548.55	2626.98	2654.95	2685.63	2699.05	2715.18	2618.35	2699.26	2724.72	2719.59	2652.03	2622.22	2668.61	2628.24	2617.28	2729.38	2665.27	2683.8	2715.29	2709.98	2829.7	2716.62	2659.97	2702.72	2699.39	2662.66	2703.93	2740.82	2678.74	2727.38	2739.56	2769.33	2708.32	2643.71	2695.7	2673.71	2645.14	2687.89	2701.17	2725.19	2764.02	2726.27	2760.09	2780.63	2720	2735.11
	70.5	2778.17	2653.88	2548.68	2628.08	2656.7	2686.01	2700.36	2717.32	2618.85	2699.1	2723.83	2721.73	2652.62	2622.12	2669.49	2628.91	2617.95	2730.25	2666.41	2683.66	2714.55	2710.33	2831.78	2718.18	2659.72	2703.36	2700.44	2662.74	2704.69	2742.29	2678.9	2726.96	2739.87	2771.6	2709.16	2644.08	2696.64	2675.25	2645.62	2688.07	2702.39	2725.77	2763.9	2726.24	2761.33	2782.04	2720.93	2736.39
	71	2780.09	2655.28	2548.58	2629.73	2658.62	2686.64	2702.12	2719.75	2619.47	2699.04	2723.12	2724.03	2653.44	2622.37	2670.61	2629.68	2618.8	2731.7	2667.5	2683.95	2714.37	2710.74	2834.64	2720.24	2659.86	2704.68	2701.98	2663.15	2705.21	2744.2	2679.73	2727.01	2740.35	2773.79	2710.35	2644.62	2697.94	2676.98	2646.28	2688.56	2703.32	2726.19	2763.8	2726.78	2762.69	2783.47	2722.18	2737.93
	71.5	2781.52	2656.76	2548.48	2631.07	2660.35	2687.06	2703.71	2722.64	2619.34	2699.09	2722.2	2726.35	2654.14	2622.58	2671.73	2630.91	2620.1	2733.6	2669.31	2684.29	2714.2	2710.91	2837.16	2722.55	2660.19	2706.45	2703.74	2663.63	2705.4	2746.45	2680.86	2727.09	2741.1	2775.87	2711.92	2644.99	2699.64	2678.44	2646.76	2689	2704.44	2726.32	2764.31	2727.07	2763.74	2784.57	2723.91	2739
	72	2782.34	2658.25	2548.15	2632.45	2661.82	2687.43	2705.13	2725.22	2619.16	2699.38	2721.36	2728.08	2654.8	2622.74	2672.65	2631.77	2621.39	2735.66	2671.13	2684.75	2714.6	2711.07	2839.1	2724.51	2660.7	2708.18	2705.57	2664.27	2705.7	2748.24	2681.93	2727.46	2742.21	2777.06	2712.7	2645.09	2700.95	2679.65	2646.62	2689.65	2705.15	2726.04	2764.91	2728.09	2763.94	2785.06	2725.44	2739.54
	72.5	2781.99	2658.98	2547.58	2633.67	2662.8	2687.62	2706.39	2726.88	2618.64	2699.92	2720.81	2728.4	2655.13	2622.67	2673.25	2632.34	2622.07	2737.52	2672.87	2685.15	2715.03	2710.99	2839.73	2725.54	2660.82	2709.23	2706.91	2664.11	2706.3	2749.52	2683.06	2727.74	2743.06	2777.43	2712.91	2645.13	2701.88	2679.83	2645.87	2690.06	2705.46	2724.64	2764.97	2728.86	2763.55	2785.21	2726.64	2739.23
	73	2780.01	2659.07	2546.29	2634.26	2663.01	2686.86	2707.42	2727.55	2616.96	2700.04	2720.21	2727.44	2654.95	2621.9	2673.03	2632.08	2621.8	2739.2	2673.67	2684.84	2715.07	2710.42	2838.63	2725.82	2660.23	2710	2707.71	2663.38	2706.52	2749.64	2683.72	2727.66	2743.55	2776.15	2711.84	2644.3	2701.88	2678.97	2644.21	2690.21	2705.35	2722.52	2764.48	2728.6	2761.63	2784.71	2726.91	2737.5
	73.5	2776.51	2658.24	2544.13	2633.81	2662	2685.11	2707.65	2726.86	2614.45	2699.43	2719.11	2724.81	2653.89	2619.83	2671.81	2630.96	2620.47	2740.33	2673.73	2683.24	2714.12	2709.54	2835.68	2724.78	2658.52	2709.65	2707.39	2661.58	2706.6	2748.16	2683.37	2726.57	2743.22	2773.54	2709.47	2642.41	2700.72	2676.59	2641.72	2689.72	2704.43	2719.86	2763.32	2727.16	2758.06	2783.61	2726.05	2734.37
	74	2771.76	2656.19	2541.38	2632.42	2659.48	2682.54	2707.13	2724.29	2611.43	2697.83	2717.98	2720.59	2651.67	2617.01	2669.28	2628.02	2617.94	2740.64	2672.35	2680.43	2712.31	2708.42	2831.18	2722.11	2655.26	2708.01	2705.1	2658.48	2706.05	2745.13	2681.82	2724.47	2741.83	2768.98	2705.33	2639.38	2698.04	2672.75	2638.25	2688.37	2701.86	2716	2760.16	2724.95	2753.07	2782.11	2723.44	2730.03
	74.5	2765.77	2652.77	2537.91	2630.07	2655.57	2678.95	2705.65	2720.52	2607.42	2695.03	2715.72	2715.51	2648.21	2612.96	2665.8	2624.28	2614.24	2739.97	2669.53	2676.32	2708.91	2706.31	2824.8	2717.9	2650.35	2704.97	2700.94	2654	2704.21	2740.66	2678.81	2720.62	2739.02	2763.19	2700.06	2634.99	2694.02	2667.74	2634.17	2685.74	2698.02	2711	2755.65	2721.29	2746.82	2779.91	2719.42	2724.41
	75	2758.69	2648.24	2533.88	2626.32	2650.32	2674.33	2703.09	2715.83	2602.49	2690.93	2712.02	2709.67	2643.67	2607.72	2661.43	2619.24	2609.51	2738.11	2665.29	2670.88	2703.95	2703.02	2817.07	2712.55	2644.16	2700.61	2695.55	2648.51	2701.09	2734.72	2674.38	2715.36	2734.52	2756.12	2693.67	2629.3	2688.81	2662.14	2629.15	2682.27	2693.28	2705.44	2749.93	2716.39	2739.18	2776.67	2713.89	2717.59
	75.5	2751.34	2642.78	2529.12	2621.71	2643.87	2669.28	2699.38	2710.24	2597.51	2685.58	2706.92	2702.93	2637.99	2601.7	2656.09	2613.19	2603.88	2735.25	2660.48	2664.5	2697.85	2698.6	2808.47	2705.86	2636.92	2694.84	2689.15	2641.81	2697.06	2727.67	2668.77	2708.71	2728.75	2748.4	2686.56	2622.76	2682.83	2655.08	2623.33	2677.74	2687.32	2699.08	2743.13	2710.9	2730.82	2772.48	2707.57	2710.19
	76	2743.27	2636.74	2524.41	2616.5	2636.84	2663.59	2694.67	2703.74	2592.24	2679.46	2700.92	2696.14	2631.66	2595.48	2650.37	2606.39	2597.83	2731.17	2654.71	2657.99	2690.94	2693.12	2798.87	2698.48	2628.94	2688.26	2681.69	2634.44	2691.71	2719.62	2662.51	2701.28	2721.81	2740.1	2678.88	2615.58	2676.15	2647.64	2617.1	2672.44	2680.27	2691.72	2735.26	2704.69	2721.91	2767.12	2699.95	2702.33
	76.5	2734.88	2630.51	2519.23	2610.93	2630.04	2657.47	2688.87	2696.86	2586.76	2672.58	2693.74	2689.18	2624.98	2588.88	2644.64	2599.55	2591.29	2726.16	2648.58	2651.2	2683.58	2686.6	2788.59	2690.67	2620.84	2681.11	2674.23	2626.79	2685.58	2711.25	2655.95	2693.21	2714.18	2731.94	2670.98	2607.86	2669.44	2639.92	2610.42	2666.58	2673.08	2684.15	2727.75	2697.96	2712.88	2760.56	2692.14	2694.43
	77	2726.28	2624	2514.25	2604.93	2623.41	2651.17	2682.39	2689.27	2581.21	2665.17	2686.45	2681.67	2617.91	2582.33	2638.54	2592.32	2584.52	2720.59	2642.42	2644.22	2675.97	2679.43	2778.31	2682.51	2612.98	2673.87	2666.64	2618.63	2679.01	2702.7	2649.29	2685.29	2705.91	2723.75	2663.29	2600.13	2662.72	2631.64	2603.12	2660.56	2665.86	2676.57	2720.01	2690.83	2703.94	2753.53	2684.3	2686.16
	77.5	2717.87	2617.48	2509.2	2599.02	2616.64	2644.71	2675.25	2681.63	2575.85	2657.3	2679.33	2674.28	2610.73	2575.95	2632.22	2585.33	2577.83	2714.68	2636.02	2637.15	2668.36	2671.94	2768.65	2674	2605.17	2666.88	2658.61	2610.49	2672.36	2694.03	2642.54	2677.07	2697.43	2715.82	2655.61	2592.51	2656.2	2623.19	2596.04	2654.1	2658.23	2669.06	2712.23	2683.17	2695.33	2746.16	2676.4	2677.57
	78	2709.4	2610.86	2504.33	2593.02	2610.04	2637.94	2667.8	2673.88	2570.25	2649.4	2672.08	2667.21	2603.55	2569.66	2626.24	2578.52	2571.47	2708.42	2629.26	2630.19	2660.53	2664.28	2759.35	2665.71	2597.52	2660.06	2650.55	2602.62	2665.16	2685.61	2635.63	2668.93	2688.59	2707.95	2648.09	2584.93	2649.65	2615.37	2589.14	2647.61	2650.89	2661.82	2704.47	2675.34	2686.72	2738.61	2667.99	2668.89
	78.5	2701.7	2603.68	2499.3	2587.13	2603.53	2631.59	2660.66	2666.23	2564.22	2641	2664.7	2660.11	2596.36	2563.18	2619.92	2572.07	2564.82	2702.17	2622.54	2622.89	2652.74	2656.36	2750.67	2657.45	2589.86	2653.02	2642.87	2595.03	2657.82	2677.74	2628.29	2660.81	2679.86	2700.19	2640.58	2577.6	2643.3	2607.52	2581.95	2641.02	2644.1	2654.94	2696.91	2667.39	2678.13	2731.39	2659.07	2660.19
	79	2694.42	2596.26	2494.12	2581.33	2596.58	2625.31	2653.79	2658.78	2558.1	2632.71	2657.2	2652.95	2589.21	2556.46	2613.47	2565.68	2558.21	2695.96	2615.51	2615.5	2644.26	2648.28	2742.85	2649.26	2582.18	2645.9	2635.16	2587.15	2650.22	2669.94	2620.46	2652.9	2671.08	2692.45	2633.07	2570.17	2637.03	2600.07	2574.84	2634.37	2637.46	2647.82	2688.82	2659.24	2669.01	2724.64	2646.41	2650.94
	79.5	2687.35	2588.86	2487.51	2575.62	2589.5	2618.14	2647.21	2651.73	2552.01	2624.57	2649.61	2646.04	2582.22	2548.47	2607.24	2559.19	2550.44	2689.3	2608.45	2608.1	2635.48	2640.37	2735.15	2641.22	2572.86	2638.23	2627.33	2577.95	2642.57	2662.33	2612.33	2644.55	2662.57	2684.86	2624.82	2561.12	2630.9	2593.05	2566.51	2627.72	2630.53	2640.19	2680.3	2650.81	2659.29	2717.56	2626.58	2641.97
	80	2680.29	2581.21	2477.23	2570.21	2582.78	2606.73	2640.73	2644.71	2545.43	2616.06	2641.31	2639.07	2575.05	2536.05	2601.13	2552.27	2537.87	2682.3	2602.1	2600.55	2626.55	2632.03	2727.27	2633.11	2558.68	2630.32	2619.68	2563.15	2634.15	2655.25	2603.91	2636.01	2654.01	2677.37	2616.36	2546.93	2624.51	2585.64	2552.55	2620.65	2623.86	2631.99	2671.28	2642.5	2647.96	2710.14	2596.84	2632.89
	80.5	2673.33	2572.86	2460.98	2564.91	2575.43	2588.7	2633.12	2637.81	2538.19	2606.68	2632.02	2632.29	2567.37	2516.41	2595.06	2544.71	2517.6	2673.9	2596	2591.82	2616.78	2622.87	2719.15	2624.1	2536.02	2622.45	2611.27	2539.42	2624.34	2647.97	2594.69	2626.52	2644.7	2669.73	2606.96	2524.83	2618.02	2577.26	2530.51	2611.79	2616.93	2622.71	2660.98	2633.05	2634.24	2701.3	2556.53	2622.88
	81	2666.31	2563.39	2438.62	2559.44	2566.5	2562.83	2620.79	2630.82	2529.34	2595.62	2620.57	2625.51	2557.75	2489.57	2588.95	2535.29	2490.08	2661.05	2589.58	2580.72	2604.8	2611.78	2710.9	2612.51	2504.94	2614.4	2600.49	2506.56	2609.57	2639.95	2583.35	2614.3	2632.87	2661.97	2595.46	2494.28	2610.94	2567.13	2500.36	2598.01	2609.14	2610.59	2648.14	2621.28	2616.38	2686.88	2506.78	2610.48
	81.5	2658.98	2549.5	2410.44	2552.38	2553.3	2529.99	2600.67	2621.4	2516.12	2578.73	2603.72	2618.92	2543	2456.24	2580.68	2521.64	2455.31	2640.51	2581.3	2564.01	2587.42	2595.66	2701.73	2595.32	2465.76	2603.8	2584.39	2465.74	2586.02	2628.52	2566.11	2595.45	2615.18	2654	2578.49	2456.46	2600.94	2551.27	2462.43	2575.86	2598.26	2592.58	2629.4	2603.68	2592.62	2663.11	2452.9	2592.04
	82	2651.5	2528.16	2378.45	2539.61	2532.74	2492.2	2570.3	2604.65	2495.54	2553.21	2578.24	2612.43	2520.59	2418.61	2565.98	2501.58	2415.64	2610.82	2566.18	2539.25	2562.1	2571.17	2692.58	2569.14	2421.43	2586.19	2560.43	2419.39	2551.47	2607.82	2540.66	2567.82	2588.18	2645.73	2553.67	2414.25	2583.39	2527.2	2419.63	2543.08	2579.79	2566.61	2602.17	2577.7	2560.93	2628.81	2402.21	2564.61
	82.5	2643.6	2498.91	2348	2518.24	2503.47	2456.6	2530.02	2577.24	2468.02	2519.05	2544.18	2605.35	2490.05	2383.12	2542.18	2474.64	2378.37	2572.07	2541.31	2505.75	2527.69	2538.1	2682.54	2533.41	2379.09	2558.21	2527.67	2375.88	2506.89	2575.25	2506.67	2531.12	2551.46	2636.85	2519.9	2374.77	2556.07	2494.91	2379.81	2500.75	2551.05	2532.15	2566.41	2542.58	2522.74	2584.02	2361.06	2527.9
	83	2633.75	2462.9	2323.93	2488.19	2467.17	2428.17	2482.2	2539.06	2433.78	2477.38	2502.77	2596.23	2452.29	2355.38	2508.73	2441.66	2349.43	2526.44	2507.12	2465.49	2485.8	2497.58	2670.26	2489.32	2346.02	2519.25	2487.13	2341.92	2454.28	2531.34	2465.44	2486.54	2506.76	2626.38	2478.69	2343.85	2519.12	2455.55	2348.78	2451.07	2512.1	2490.16	2523.66	2499.9	2480.25	2530.8	2331.69	2483.31
	83.5	2616.62	2422	2306.62	2449.99	2425.75	2408.64	2433	2491.05	2396.04	2430.69	2456.54	2580.79	2410.16	2336.1	2466.97	2404.82	2329.04	2480.27	2464.57	2421.26	2439.41	2452.61	2650.32	2440.55	2322.81	2470.83	2441.93	2318.19	2400.91	2477.49	2420.12	2437.74	2457.02	2609.65	2432.78	2322.79	2473.59	2411.4	2327.26	2400.63	2464.44	2444.64	2476.59	2452.38	2437.39	2476.89	2313.96	2433.98
	84	2589.34	2382.32	2296.43	2406.69	2385.21	2397.3	2389.31	2438.02	2359.78	2386.56	2412.49	2556	2370.33	2324.75	2420.53	2369.52	2317.27	2440	2417.56	2380.03	2396.15	2409.69	2619.62	2393.82	2308.94	2417.44	2398.63	2303.93	2354.77	2419.44	2378.21	2392.6	2409.81	2583.25	2389.24	2310.51	2423.87	2369.59	2314.74	2356.69	2412.77	2402.89	2433.18	2407.55	2399.08	2430.21	2305.5	2387.82
	84.5	2551.51	2350.03	2292.38	2366.67	2351.52	2392.51	2356.36	2389.53	2330.75	2350.99	2376.8	2521.3	2338.18	2320.27	2378.43	2340.62	2313.04	2409.59	2375.44	2347.06	2361.19	2375.1	2577.31	2356	2303.12	2369.32	2363.28	2298.39	2320.3	2368.72	2344.73	2356.85	2372	2546.52	2353.93	2305.32	2379.92	2335.67	2309.82	2323.52	2367.03	2369.84	2398.79	2371.48	2369.69	2394.8	2302.23	2350.88
	85	2504.11	2327.06	2291.66	2335.49	2327.37	2390.59	2334.37	2352.34	2309.95	2325.99	2351.36	2478.34	2315.56	2319.26	2346.06	2319.91	2312.38	2389.55	2343.28	2324.59	2336.89	2350.98	2524.71	2329.29	2301.66	2332.35	2337.95	2296.86	2297.21	2330.74	2321.3	2331.93	2345.65	2500.33	2328.8	2303.83	2346.72	2311.3	2308.6	2301.29	2332.29	2346.77	2374.65	2345.86	2349.55	2371.26	2300.9	2324.88
	85.5	2450.55	2312.84	2291.51	2314.13	2312.02	2389.48	2322.35	2327.17	2297.49	2310.61	2335.73	2430.02	2301.95	2318.94	2324.28	2307.06	2312.01	2378.63	2321.48	2311.59	2322.32	2336.31	2465.6	2313.25	2300.72	2307.7	2322.54	2296.39	2285.23	2305.82	2307.47	2317.64	2329.87	2447.78	2313.3	2303.28	2324.46	2296.01	2307.77	2289.3	2309.47	2333.55	2360.33	2330.23	2337.66	2359.01	2300.43	2309.2
	86	2401.03	2306.41	2291.73	2301.98	2304.71	2387.9	2317.25	2313.39	2291.44	2303.76	2328.67	2385.3	2295.99	2318.63	2312.09	2300.67	2311.56	2373.52	2309.61	2306.3	2315.85	2329.46	2410.69	2306.08	2299.88	2293.89	2315.32	2295.94	2280.63	2292.72	2301.44	2311.87	2323.06	2398.28	2305.97	2302.63	2312.6	2288.74	2306.72	2284.44	2297.34	2327.77	2354.51	2323.56	2331.97	2354.13	2300.24	2302.31
	86.5	2362.47	2304.51	2291.83	2297.5	2302.31	2386.23	2315.56	2308.16	2289.38	2301.6	2326.64	2350.57	2293.98	2318.28	2307.9	2298.35	2310.92	2371.37	2305.51	2304.86	2313.49	2327.25	2367.76	2304.05	2299.15	2288.91	2313.08	2295.59	2279.15	2288.46	2299.56	2310.38	2321.02	2359.14	2303.13	2302.05	2308.93	2286.09	2305.62	2282.67	2293.53	2325.57	2352.27	2321.5	2329.64	2352.25	2300.04	2300.23
	87	2335.97	2304.2	2291.53	2296.69	2301.73	2385.15	2314.39	2307.14	2288.83	2300.92	2326.23	2326.98	2293.5	2317.8	2306.76	2297.55	2310.08	2370.03	2304.5	2304.51	2312.62	2326.27	2337.73	2303.67	2298.58	2287.66	2312.55	2295.27	2278.36	2287.8	2299.09	2310.04	2320.39	2332.01	2301.71	2301.78	2308.16	2285.03	2304.57	2282	2292.95	2324.49	2351.83	2320.85	2328.64	2351.2	2299.98	2299.1
	87.5	2320.97	2303.99	2290.78	2296.41	2301.45	2384.96	2313.73	2306.95	2288.32	2299.83	2325.96	2313.4	2293.14	2317.22	2306.01	2296.77	2309.19	2368.91	2304.24	2303.82	2311.68	2324.83	2320.28	2303.57	2298.15	2287.12	2312.19	2295.2	2277.98	2287.38	2298.74	2309.67	2319.59	2316.26	2301.04	2301.41	2307.66	2284.48	2303.72	2281.8	2292.9	2323.82	2351.75	2320.83	2328.01	2350.51	2299.78	2298.31
	88	2315.28	2303.78	2290.04	2295.82	2301.26	2384.57	2313.23	2306.57	2288.12	2299.13	2325.7	2308.37	2293	2316.55	2305.1	2296.13	2308.64	2368.31	2303.94	2302.65	2310.92	2323.88	2313.13	2303.46	2297.94	2286.67	2311.72	2294.63	2277.34	2286.91	2298.21	2308.87	2318.68	2310.03	2300.39	2300.67	2307.38	2284.37	2303.13	2281.52	2292.32	2323.14	2351.5	2320.9	2327.73	2349.91	2299.3	2297.68
	88.5	2313.93	2303.46	2289.4	2295.36	2301.12	2384.69	2313.01	2306.21	2287.68	2298.2	2325.46	2307.35	2292.83	2315.95	2304.4	2295.89	2308.27	2368.07	2303.57	2301.83	2310.4	2323.31	2310.99	2302.98	2297.85	2286.75	2311.37	2294.05	2276.38	2286.82	2297.83	2308.03	2318.05	2308.55	2299.98	2299.77	2307.31	2284.25	2302.9	2280.95	2291.6	2322.72	2351.14	2320.51	2327.54	2349.38	2298.49	2296.94
	89	2313.32	2303.13	2288.78	2294.87	2300.82	2384.92	2312.75	2306.28	2287.26	2297.36	2325.23	2306.99	2292.95	2315.51	2303.93	2295.24	2308.13	2367.56	2303.24	2301.34	2310.19	2322.95	2309.43	2302.45	2297.99	2286.96	2310.63	2293.59	2275.23	2287.07	2297.64	2307.32	2317.59	2307.85	2299.81	2299.01	2307.43	2283.92	2302.86	2280.63	2290.88	2322.4	2351.39	2320.36	2327.76	2349.12	2297.69	2296.08
	89.5	2312.83	2302.53	2288.48	2294.41	2300.59	2384.98	2312.77	2305.96	2286.22	2296.59	2324.99	2306.54	2292.74	2314.91	2303.68	2294.23	2307.77	2366.73	2302.97	2301.12	2310.06	2322.76	2308.21	2301.94	2298.12	2286.64	2309.99	2292.64	2274.28	2286.98	2297.45	2306.69	2317.04	2307.27	2299.65	2298.17	2307.41	2283.88	2302.88	2280.36	2290.2	2321.93	2350.9	2320.32	2327.61	2348.86	2296.79	2295.57
	90	2312.21	2301.78	2288.47	2294.06	2300.47	2384.22	2312.4	2305.05	2285.25	2296.51	2324.95	2306.22	2292.46	2314.28	2303.69	2293.53	2307.4	2365.67	2302.27	2301.11	2310.07	2323.19	2307.04	2301.24	2297.81	2286.19	2309.28	2291.55	2273.43	2286.94	2297.3	2306.25	2316.66	2306.76	2298.84	2297.45	2307.62	2283.84	2302.73	2279.85	2289.58	2321.38	2350.21	2319.9	2327.31	2348.38	2295.84	2294.92
	90.5	2311.85	2300.96	2288.27	2294.09	2300.46	2383.53	2311.9	2304.27	2284.04	2296.01	2325.01	2305.63	2291.98	2313.94	2303.99	2292.83	2306.47	2364.3	2301.87	2301.57	2310.32	2323.24	2306.09	2300.36	2297.34	2285.37	2308.78	2290.38	2273.08	2286.94	2297.25	2305.97	2316.23	2306.29	2298.33	2296.9	2307.64	2283.42	2302.37	2279.5	2289.12	2321	2349.62	2319.58	2326.82	2347.47	2294.86	2294.42
	91	2311.66	2300.1	2287.87	2294.01	2300.23	2382.81	2311.19	2303.38	2283.32	2295.88	2324.82	2305.19	2291.44	2313.41	2304.29	2292.11	2305.61	2362.94	2301.44	2301.54	2310.19	2322.9	2305.05	2299.79	2296.62	2284.13	2308.08	2289.49	2273.23	2286.53	2296.95	2305.48	2315.52	2305.77	2297.66	2296.6	2306.95	2283.08	2302.15	2279.19	2288.96	2320.5	2348.87	2319.47	2326.15	2346.29	2294.07	2294.1
	91.5	2311.49	2299.27	2287.63	2294.03	2300.04	2381.76	2310.65	2302.05	2282.84	2295.54	2323.98	2304.61	2290.74	2312.8	2304.16	2291.56	2304.72	2361.73	2300.97	2301.39	2309.82	2322.19	2304.49	2299.23	2295.9	2283.12	2307.69	2288.74	2273.84	2286.01	2296.34	2304.69	2314.69	2305.41	2296.89	2296.07	2305.9	2282.97	2302.06	2278.63	2288.65	2319.91	2347.74	2318.98	2325.14	2345.24	2293.4	2293.8
	92	2310.96	2298.54	2287.28	2293.63	2299.65	2380.81	2309.75	2301.16	2282.78	2295.18	2322.87	2303.98	2289.94	2312.38	2303.85	2291.46	2304.05	2360.69	2300.4	2301.09	2309.27	2321.59	2303.88	2298.56	2294.82	2282.27	2306.8	2288.27	2274.26	2285.63	2295.51	2303.82	2313.74	2304.56	2296.22	2295.31	2305.02	2282.45	2301.5	2277.84	2288.06	2319.46	2346.94	2318.25	2324.35	2344.13	2292.88	2293.67
	92.5	2310.45	2298.12	2286.78	2293.16	2298.97	2380.36	2309.01	2300.75	2282.95	2294.45	2321.66	2303.34	2289.11	2312.07	2303.08	2291.42	2303.53	2359.72	2299.94	2300.72	2308.94	2320.64	2303.19	2297.92	2294.12	2281.7	2306.27	2287.81	2274.76	2285.03	2294.82	2302.97	2312.93	2303.58	2296.19	2294.69	2303.94	2281.84	2300.7	2277.18	2287.45	2318.98	2346.35	2317.72	2323.84	2343.18	2292.68	2293.84
	93	2309.82	2297.88	2286.48	2292.31	2298	2380.17	2308.4	2300.45	2283.37	2294.19	2320.29	2302.89	2288.45	2311.17	2302.29	2291.37	2303.09	2358.7	2299.06	2299.75	2308.21	2319.91	2302.36	2297.52	2293.26	2281.24	2305.65	2287.63	2274.87	2284.17	2294.25	2302.07	2311.99	2302.62	2295.95	2293.88	2303	2281.43	2300.12	2276.59	2287.08	2318.09	2345.8	2316.89	2323.27	2342.44	2292.66	2293.82
	93.5	2308.83	2297.66	2285.88	2291.59	2297.04	2380.16	2307.75	2300.25	2283.49	2293.97	2319.14	2302.07	2287.74	2310.3	2301.37	2291.52	2302.28	2357.46	2298.11	2298.9	2307.71	2319.48	2301.6	2296.87	2292.44	2280.93	2305.3	2287.22	2274.48	2283.6	2293.91	2301.59	2311.18	2301.74	2295.8	2292.95	2302.95	2280.93	2298.77	2275.9	2286.59	2317.43	2345.5	2316	2322.95	2341.72	2292.59	2293.76
	94	2308.26	2297.12	2285.24	2290.43	2295.79	2380.68	2307.49	2300.02	2283.52	2294.13	2318.49	2301.3	2287.63	2309.2	2301.08	2291.68	2300.25	2356.35	2297.42	2297.86	2307.29	2319.08	2300.79	2295.63	2291	2280	2304.91	2286.28	2274.5	2282.86	2293.79	2301.18	2310.08	2300.97	2295.22	2292.03	2303.79	2280.08	2298.27	2275.66	2286.65	2316.64	2345.74	2314.74	2322.78	2340.43	2292.48	2293.71
	94.5	2307.66	2296.73	2284.49	2289.43	2294.48	2381.31	2307.29	2299.72	2283.52	2294.46	2318.03	2300.56	2287.56	2307.8	2300.82	2291.77	2298.21	2355.09	2296.4	2296.48	2306.81	2318.68	2299.86	2294.62	2289.72	2279.25	2304.78	2285.48	2274.22	2281.95	2293.89	2300.87	2309.09	2300.49	2294.71	2291.24	2304.63	2279.45	2297.76	2275.41	2286.9	2315.72	2345.88	2313.57	2322.5	2339.21	2292.32	2293.47
	95	2308.26	2295.14	2283.89	2287.8	2292.83	2382.11	2308.27	2298.5	2283.26	2295.21	2318.02	2299.66	2288.91	2306.35	2301.75	2291.57	2293.42	2354.37	2296.57	2295.4	2306.47	2317.98	2299.57	2291.91	2287.34	2277.34	2304.68	2283.59	2275.87	2281.24	2294.1	2300.25	2307.35	2300.37	2292.85	2290.24	2307.37	2278.18	2299.73	2275.99	2287.99	2314.71	2346.95	2311.24	2322.52	2337.09	2292.09	2293.1
[truncated: 36 more columns]

## Sheet: Run Information
File Name	Untreated Tempreature MeJA.pcrd
Created By User	admin
Notes
ID
Run Started	08/04/2025 06:55:22 UTC
Run Ended	08/04/2025 08:01:40 UTC
Sample Vol	10
Lid Temp	105
Protocol File Name	Mei5Bio-2step.prcl
Plate Setup File Name	Untreated Tempreature MeJA.pltd
Base Serial Number	CT022697
Optical Head Serial Number	785BR15045
CFX Maestro Version	5.2.008.0222.
